# Supplementary material for: Screening out unfeasible hypothetical zeolite structures via the closest non-adjacent O⋯O pairs
Source: Royal Society of Chemistry journal article supplement (doi:10.1039/c6cp06217b), 2016-12-06
Supplement: c6cp06217b1.pdf [file c6cp06217b1.pdf]

## Electronic Supplementary Information

### Screening out unfeasible hypothetical zeolite structures via the closest non-adjacent O...O pairs

Junran Lu,<sup>a</sup> Lin Li,<sup>a</sup> Hongxiao Cao,<sup>a</sup> Yi Li<sup>a\*</sup>, Jihong Yu<sup>a\*</sup>

<sup>a</sup> The State Key Laboratory of Inorganic Synthesis and Preparative Chemistry, College of Chemistry, Jilin University, Qianjin Street 2699, Changchun 130012, China.

Corresponding authors' Email: yili@jlu.edu.cn, jihong@jlu.edu.cn

#### Table of contents

Table S1. Framework densities, framework energies relative to  $\alpha$ -quartz, and local interatomic distances for all existing non-interrupted zeolite frameworks.

Table S2. Framework densities, framework energies relative to  $\alpha$ -quartz, FD- $\Delta E$  offsets, and local interatomic distances for 941 hypothetical zeolites selected from Deem\_PCOD database.

Table S3. 153 unfeasible hypothetical frameworks detected by the TTT criteria.

Table S4. Shortest non-adjacent O...O distances for different sizes of rings among 231 existing zeolites.

Table S5. Shortest non-adjacent O...O distances for different sizes of rings among 941 hypothetical zeolites.

**Table S1.** Framework densities, framework energies relative to  $\alpha$ -quartz, and local interatomic distances for all existing non-interrupted zeolite frameworks

| Zeolite | FD<br>(T nm <sup>-3</sup> ) | $\Delta E$<br>(kJ mol <sup>-1</sup> ) | $\langle D_{TO} \rangle$<br>(Å) | $\sigma_{TO}$<br>(Å) | $R_{TO}$<br>(Å) | $\langle D_{OO} \rangle$<br>(Å) | $\sigma_{OO}$<br>(Å) | $R_{OO}$<br>(Å) | $\langle D_{TT} \rangle$<br>(Å) | $\sigma_{TT}$<br>(Å) | $R_{TT}$<br>(Å) | $\epsilon_{OO}$<br>(Å) | $\epsilon_{TT}$<br>(Å) |
|---------|-----------------------------|---------------------------------------|---------------------------------|----------------------|-----------------|---------------------------------|----------------------|-----------------|---------------------------------|----------------------|-----------------|------------------------|------------------------|
| ABW     | 18.89                       | 11.69                                 | 1.5993                          | 0.0081               | 0.0197          | 2.6115                          | 0.0266               | 0.0803          | 3.0870                          | 0.0236               | 0.0578          | 0.0001                 | 0.0005                 |
| ACO     | 16.99                       | 18.47                                 | 1.5978                          | 0.0112               | 0.0259          | 2.6091                          | 0.0196               | 0.0392          | 3.0981                          | 0.0339               | 0.0784          | 0.0003                 | 0.0030                 |
| AEI     | 15.57                       | 16.55                                 | 1.6028                          | 0.0032               | 0.0101          | 2.6171                          | 0.0307               | 0.0784          | 3.0730                          | 0.0141               | 0.0440          | 0.0000                 | 0.0025                 |
| AEL     | 19.68                       | 9.97                                  | 1.5998                          | 0.0063               | 0.0256          | 2.6123                          | 0.0198               | 0.0885          | 3.0832                          | 0.0298               | 0.1251          | 0.0001                 | 0.0021                 |
| AEN     | 20.69                       | 10.42                                 | 1.6029                          | 0.0080               | 0.0322          | 2.6171                          | 0.0397               | 0.1540          | 3.0674                          | 0.0540               | 0.1775          | 0.0002                 | 0.0025                 |
| AET     | 18.18                       | 13.29                                 | 1.6027                          | 0.0099               | 0.0390          | 2.6168                          | 0.0308               | 0.1864          | 3.0695                          | 0.0580               | 0.1991          | 0.0001                 | 0.0016                 |
| AFG     | 17.95                       | 13.07                                 | 1.5991                          | 0.0062               | 0.0208          | 2.6111                          | 0.0238               | 0.0730          | 3.0892                          | 0.0177               | 0.0566          | 0.0001                 | 0.0004                 |
| AFI     | 18.03                       | 10.78                                 | 1.6016                          | 0.0053               | 0.0137          | 2.6152                          | 0.0201               | 0.0658          | 3.0748                          | 0.0215               | 0.0555          | 0.0002                 | 0.0017                 |
| AFN     | 17.96                       | 18.08                                 | 1.6064                          | 0.0085               | 0.0346          | 2.6231                          | 0.0311               | 0.1141          | 3.0531                          | 0.0492               | 0.1680          | 0.0001                 | 0.0003                 |
| AFO     | 19.79                       | 9.86                                  | 1.6005                          | 0.0061               | 0.0248          | 2.6135                          | 0.0221               | 0.1211          | 3.0793                          | 0.0267               | 0.0957          | 0.0001                 | 0.0022                 |
| AFR     | 15.48                       | 16.73                                 | 1.6052                          | 0.0058               | 0.0232          | 2.6212                          | 0.0227               | 0.0768          | 3.0595                          | 0.0326               | 0.1039          | 0.0001                 | 0.0010                 |
| AFS     | 14.85                       | 18.97                                 | 1.6064                          | 0.0076               | 0.0370          | 2.6231                          | 0.0280               | 0.0925          | 3.0540                          | 0.0489               | 0.1714          | 0.0001                 | 0.0012                 |
| AFT     | 15.60                       | 16.33                                 | 1.6027                          | 0.0030               | 0.0093          | 2.6169                          | 0.0294               | 0.0704          | 3.0735                          | 0.0185               | 0.0531          | 0.0000                 | 0.0026                 |
| AFV     | 16.13                       | 17.42                                 | 1.6025                          | 0.0089               | 0.0312          | 2.6164                          | 0.0397               | 0.1416          | 3.0745                          | 0.0304               | 0.1185          | 0.0001                 | 0.0025                 |
| AFX     | 15.60                       | 16.37                                 | 1.6027                          | 0.0029               | 0.0090          | 2.6169                          | 0.0291               | 0.0697          | 3.0736                          | 0.0196               | 0.0534          | 0.0000                 | 0.0026                 |
| AFY     | 14.12                       | 27.23                                 | 1.6093                          | 0.0135               | 0.0456          | 2.6275                          | 0.0405               | 0.1258          | 3.0415                          | 0.0873               | 0.2583          | 0.0001                 | 0.0027                 |
| AHT     | 19.67                       | 18.48                                 | 1.6060                          | 0.0135               | 0.0486          | 2.6219                          | 0.0368               | 0.1904          | 3.0548                          | 0.0835               | 0.2500          | 0.0003                 | 0.0002                 |
| ANA     | 19.90                       | 13.66                                 | 1.6036                          | 0.0032               | 0.0066          | 2.6184                          | 0.0326               | 0.0817          | 3.0666                          | 0.0000               | 0.0002          | 0.0001                 | 0.0001                 |
| APC     | 18.38                       | 14.94                                 | 1.6001                          | 0.0083               | 0.0245          | 2.6125                          | 0.0345               | 0.1256          | 3.0848                          | 0.0497               | 0.1647          | 0.0002                 | 0.0013                 |
| APD     | 19.34                       | 12.29                                 | 1.6010                          | 0.0048               | 0.0166          | 2.6143                          | 0.0211               | 0.0714          | 3.0787                          | 0.0275               | 0.1007          | 0.0002                 | 0.0004                 |
| AST     | 17.53                       | 15.97                                 | 1.6013                          | 0.0048               | 0.0134          | 2.6148                          | 0.0179               | 0.0521          | 3.0786                          | 0.0021               | 0.0052          | 0.0002                 | 0.0008                 |
| ASV     | 20.10                       | 21.68                                 | 1.6104                          | 0.0083               | 0.0247          | 2.6294                          | 0.0249               | 0.1095          | 3.0335                          | 0.0613               | 0.1345          | 0.0000                 | 0.0003                 |
| ATN     | 18.70                       | 12.30                                 | 1.6002                          | 0.0048               | 0.0129          | 2.6128                          | 0.0321               | 0.0927          | 3.0828                          | 0.0082               | 0.0265          | 0.0000                 | 0.0004                 |
| ATO     | 20.00                       | 10.05                                 | 1.6020                          | 0.0057               | 0.0166          | 2.6158                          | 0.0250               | 0.0693          | 3.0718                          | 0.0606               | 0.1633          | 0.0001                 | 0.0028                 |
| ATS     | 16.97                       | 12.78                                 | 1.6032                          | 0.0055               | 0.0158          | 2.6177                          | 0.0265               | 0.0779          | 3.0678                          | 0.0256               | 0.0744          | 0.0000                 | 0.0009                 |
| ATT     | 18.16                       | 15.11                                 | 1.6035                          | 0.0066               | 0.0266          | 2.6182                          | 0.0338               | 0.1130          | 3.0674                          | 0.0213               | 0.0628          | 0.0000                 | 0.0004                 |
| ATV     | 21.07                       | 8.85                                  | 1.5994                          | 0.0061               | 0.0209          | 2.6117                          | 0.0204               | 0.0816          | 3.0840                          | 0.0320               | 0.1247          | 0.0001                 | 0.0030                 |
| AVL     | 15.98                       | 17.84                                 | 1.6026                          | 0.0082               | 0.0281          | 2.6165                          | 0.0396               | 0.1274          | 3.0746                          | 0.0327               | 0.1341          | 0.0002                 | 0.0029                 |
| AWO     | 18.55                       | 14.00                                 | 1.6021                          | 0.0081               | 0.0261          | 2.6157                          | 0.0395               | 0.1538          | 3.0742                          | 0.0367               | 0.1435          | 0.0002                 | 0.0002                 |

| Zeolite     | FD<br>(T nm <sup>-3</sup> ) | $\Delta E$<br>(kJ mol <sup>-1</sup> ) | $\langle D_{TO} \rangle$<br>(Å) | $\sigma_{TO}$<br>(Å) | $R_{TO}$<br>(Å) | $\langle D_{OO} \rangle$<br>(Å) | $\sigma_{OO}$<br>(Å) | $R_{OO}$<br>(Å) | $\langle D_{TT} \rangle$<br>(Å) | $\sigma_{TT}$<br>(Å) | $R_{TT}$<br>(Å) | $\epsilon_{OO}$<br>(Å) | $\epsilon_{TT}$<br>(Å) |
|-------------|-----------------------------|---------------------------------------|---------------------------------|----------------------|-----------------|---------------------------------|----------------------|-----------------|---------------------------------|----------------------|-----------------|------------------------|------------------------|
| <b>AWW</b>  | 17.25                       | 15.00                                 | 1.6015                          | 0.0039               | 0.0101          | 2.6151                          | 0.0261               | 0.0755          | 3.0775                          | 0.0206               | 0.0615          | 0.0001                 | 0.0008                 |
| <b>BCT</b>  | 21.06                       | 7.57                                  | 1.5992                          | 0.0015               | 0.0044          | 2.6113                          | 0.0127               | 0.0373          | 3.0843                          | 0.0119               | 0.0256          | 0.0002                 | 0.0039                 |
| <b>BEA</b>  | 15.71                       | 14.34                                 | 1.6006                          | 0.0038               | 0.0172          | 2.6134                          | 0.0283               | 0.1125          | 3.0830                          | 0.0410               | 0.1429          | 0.0001                 | 0.0016                 |
| <b>BEC</b>  | 15.43                       | 15.93                                 | 1.6021                          | 0.0076               | 0.0314          | 2.6158                          | 0.0315               | 0.1138          | 3.0759                          | 0.0310               | 0.0999          | 0.0001                 | 0.0019                 |
| <b>BIK</b>  | 20.81                       | 6.78                                  | 1.6019                          | 0.0040               | 0.0131          | 2.6158                          | 0.0206               | 0.0760          | 3.0705                          | 0.0141               | 0.0311          | 0.0002                 | 0.0044                 |
| <b>BOF</b>  | 18.54                       | 11.91                                 | 1.6029                          | 0.0050               | 0.0183          | 2.6173                          | 0.0305               | 0.1124          | 3.0684                          | 0.0238               | 0.0665          | 0.0001                 | 0.0016                 |
| <b>BOG</b>  | 16.17                       | 13.90                                 | 1.6026                          | 0.0051               | 0.0238          | 2.6167                          | 0.0310               | 0.1273          | 3.0717                          | 0.0400               | 0.1532          | 0.0000                 | 0.0001                 |
| <b>BOZ</b>  | 12.66                       | 45.62                                 | 1.6236                          | 0.0077               | 0.0326          | 2.6513                          | 0.0165               | 0.0813          | 2.9682                          | 0.0338               | 0.1407          | 0.0003                 | 0.0002                 |
| <b>BPH</b>  | 14.84                       | 19.11                                 | 1.6064                          | 0.0075               | 0.0360          | 2.6231                          | 0.0278               | 0.0914          | 3.0539                          | 0.0484               | 0.1724          | 0.0001                 | 0.0012                 |
| <b>BRE</b>  | 18.43                       | 13.65                                 | 1.6033                          | 0.0082               | 0.0351          | 2.6180                          | 0.0234               | 0.0927          | 3.0676                          | 0.0373               | 0.1458          | 0.0001                 | 0.0005                 |
| <b>BSV</b>  | 18.25                       | 38.91                                 | 1.6247                          | 0.0061               | 0.0151          | 2.6529                          | 0.0168               | 0.0431          | 2.9626                          | 0.0136               | 0.0274          | 0.0002                 | 0.0005                 |
| <b>CAN</b>  | 18.10                       | 12.86                                 | 1.6002                          | 0.0078               | 0.0269          | 2.6129                          | 0.0213               | 0.0861          | 3.0830                          | 0.0226               | 0.0758          | 0.0002                 | 0.0004                 |
| <b>CAS</b>  | 20.84                       | 7.54                                  | 1.6001                          | 0.0046               | 0.0193          | 2.6126                          | 0.0284               | 0.1248          | 3.0801                          | 0.0341               | 0.1048          | 0.0000                 | 0.0036                 |
| <b>CDO</b>  | 19.61                       | 13.33                                 | 1.6033                          | 0.0089               | 0.0371          | 2.6173                          | 0.0528               | 0.2189          | 3.0664                          | 0.0502               | 0.1905          | 0.0006                 | 0.0017                 |
| <b>CFI</b>  | 18.11                       | 10.63                                 | 1.6015                          | 0.0073               | 0.0285          | 2.6151                          | 0.0230               | 0.0982          | 3.0743                          | 0.0413               | 0.1633          | 0.0000                 | 0.0023                 |
| <b>CGF</b>  | 18.76                       | 17.19                                 | 1.6076                          | 0.0091               | 0.0330          | 2.6249                          | 0.0320               | 0.1184          | 3.0462                          | 0.0481               | 0.1782          | 0.0000                 | 0.0008                 |
| <b>CGS</b>  | 17.11                       | 19.17                                 | 1.6093                          | 0.0054               | 0.0239          | 2.6279                          | 0.0237               | 0.0857          | 3.0387                          | 0.0252               | 0.0881          | 0.0002                 | 0.0002                 |
| <b>CHA</b>  | 15.59                       | 16.26                                 | 1.6027                          | 0.0031               | 0.0087          | 2.6170                          | 0.0300               | 0.0694          | 3.0734                          | 0.0160               | 0.0405          | 0.0000                 | 0.0026                 |
| <b>CON-</b> | 16.06                       | 14.61                                 | 1.6026                          | 0.0069               | 0.0306          | 2.6167                          | 0.0253               | 0.1082          | 3.0720                          | 0.0478               | 0.1559          | 0.0000                 | 0.0004                 |
| <b>CSV</b>  | 16.23                       | 16.63                                 | 1.6025                          | 0.0061               | 0.0274          | 2.6164                          | 0.0304               | 0.1428          | 3.0736                          | 0.0434               | 0.1748          | 0.0001                 | 0.0015                 |
| <b>CZP</b>  | 20.58                       | 40.79                                 | 1.6210                          | 0.0085               | 0.0260          | 2.6461                          | 0.0588               | 0.2056          | 2.9837                          | 0.0498               | 0.1298          | 0.0006                 | 0.0022                 |
| <b>DAC</b>  | 18.74                       | 11.25                                 | 1.6004                          | 0.0059               | 0.0285          | 2.6131                          | 0.0326               | 0.1436          | 3.0815                          | 0.0370               | 0.1285          | 0.0001                 | 0.0007                 |
| <b>DDR</b>  | 18.10                       | 11.92                                 | 1.5984                          | 0.0054               | 0.0255          | 2.6098                          | 0.0306               | 0.1521          | 3.0916                          | 0.0372               | 0.1372          | 0.0002                 | 0.0003                 |
| <b>DFO</b>  | 15.09                       | 19.15                                 | 1.6061                          | 0.0065               | 0.0271          | 2.6225                          | 0.0220               | 0.1175          | 3.0559                          | 0.0449               | 0.1640          | 0.0001                 | 0.0014                 |
| <b>DFT</b>  | 19.06                       | 13.89                                 | 1.6035                          | 0.0031               | 0.0086          | 2.6184                          | 0.0226               | 0.0615          | 3.0672                          | 0.0297               | 0.0765          | 0.0001                 | 0.0001                 |
| <b>DOH</b>  | 18.80                       | 10.55                                 | 1.5967                          | 0.0039               | 0.0177          | 2.6070                          | 0.0210               | 0.0904          | 3.0998                          | 0.0320               | 0.1170          | 0.0000                 | 0.0008                 |
| <b>DON</b>  | 17.37                       | 10.17                                 | 1.5999                          | 0.0048               | 0.0154          | 2.6123                          | 0.0199               | 0.0714          | 3.0833                          | 0.0343               | 0.1132          | 0.0000                 | 0.0014                 |
| <b>EAB</b>  | 16.49                       | 16.37                                 | 1.6018                          | 0.0057               | 0.0164          | 2.6155                          | 0.0337               | 0.0952          | 3.0773                          | 0.0259               | 0.0723          | 0.0001                 | 0.0019                 |
| <b>EDI</b>  | 16.64                       | 22.79                                 | 1.6046                          | 0.0134               | 0.0359          | 2.6202                          | 0.0191               | 0.0742          | 3.0665                          | 0.0456               | 0.1182          | 0.0003                 | 0.0046                 |
| <b>EEI</b>  | 19.11                       | 10.44                                 | 1.5989                          | 0.0071               | 0.0415          | 2.6104                          | 0.0331               | 0.1777          | 3.0882                          | 0.0464               | 0.2360          | 0.0003                 | 0.0015                 |
| <b>EMT</b>  | 13.50                       | 20.08                                 | 1.6072                          | 0.0055               | 0.0162          | 2.6245                          | 0.0289               | 0.0858          | 3.0499                          | 0.0319               | 0.0739          | 0.0002                 | 0.0012                 |

| Zeolite | FD<br>(T nm <sup>-3</sup> ) | $\Delta E$<br>(kJ mol <sup>-1</sup> ) | $\langle D_{TO} \rangle$<br>(Å) | $\sigma_{TO}$<br>(Å) | $R_{TO}$<br>(Å) | $\langle D_{OO} \rangle$<br>(Å) | $\sigma_{OO}$<br>(Å) | $R_{OO}$<br>(Å) | $\langle D_{TT} \rangle$<br>(Å) | $\sigma_{TT}$<br>(Å) | $R_{TT}$<br>(Å) | $\epsilon_{OO}$<br>(Å) | $\epsilon_{TT}$<br>(Å) |
|---------|-----------------------------|---------------------------------------|---------------------------------|----------------------|-----------------|---------------------------------|----------------------|-----------------|---------------------------------|----------------------|-----------------|------------------------|------------------------|
| EON     | 17.42                       | 14.99                                 | 1.6028                          | 0.0080               | 0.0397          | 2.6170                          | 0.0315               | 0.1089          | 3.0707                          | 0.0412               | 0.1760          | 0.0000                 | 0.0000                 |
| EPI     | 18.80                       | 12.03                                 | 1.6023                          | 0.0058               | 0.0206          | 2.6163                          | 0.0290               | 0.1133          | 3.0717                          | 0.0417               | 0.1323          | 0.0000                 | 0.0010                 |
| ERI     | 16.51                       | 16.35                                 | 1.6021                          | 0.0082               | 0.0303          | 2.6159                          | 0.0301               | 0.0832          | 3.0756                          | 0.0265               | 0.1018          | 0.0001                 | 0.0015                 |
| ESV     | 17.77                       | 13.17                                 | 1.5994                          | 0.0049               | 0.0245          | 2.6114                          | 0.0355               | 0.1540          | 3.0879                          | 0.0241               | 0.0851          | 0.0001                 | 0.0006                 |
| ETR     | 15.66                       | 21.09                                 | 1.6106                          | 0.0060               | 0.0255          | 2.6299                          | 0.0258               | 0.0910          | 3.0322                          | 0.0287               | 0.0939          | 0.0001                 | 0.0000                 |
| EUO     | 18.27                       | 11.35                                 | 1.5996                          | 0.0084               | 0.0416          | 2.6116                          | 0.0342               | 0.1706          | 3.0851                          | 0.0456               | 0.2058          | 0.0002                 | 0.0012                 |
| EZT     | 17.41                       | 16.61                                 | 1.6059                          | 0.0055               | 0.0237          | 2.6221                          | 0.0273               | 0.0886          | 3.0550                          | 0.0480               | 0.1583          | 0.0000                 | 0.0003                 |
| FAR     | 17.89                       | 13.10                                 | 1.5983                          | 0.0048               | 0.0212          | 2.6098                          | 0.0273               | 0.0742          | 3.0935                          | 0.0146               | 0.0594          | 0.0001                 | 0.0009                 |
| FAU     | 13.50                       | 19.84                                 | 1.6074                          | 0.0054               | 0.0153          | 2.6247                          | 0.0292               | 0.0748          | 3.0490                          | 0.0308               | 0.0715          | 0.0002                 | 0.0011                 |
| FER     | 18.72                       | 11.34                                 | 1.5996                          | 0.0074               | 0.0303          | 2.6118                          | 0.0320               | 0.1291          | 3.0855                          | 0.0427               | 0.1577          | 0.0000                 | 0.0007                 |
| FRA     | 18.50                       | 12.85                                 | 1.6003                          | 0.0044               | 0.0219          | 2.6130                          | 0.0322               | 0.1233          | 3.0826                          | 0.0258               | 0.1017          | 0.0001                 | 0.0000                 |
| GIS     | 17.13                       | 14.95                                 | 1.6026                          | 0.0020               | 0.0040          | 2.6166                          | 0.0313               | 0.0695          | 3.0737                          | 0.0193               | 0.0386          | 0.0001                 | 0.0021                 |
| GIU     | 17.94                       | 13.25                                 | 1.5980                          | 0.0069               | 0.0308          | 2.6092                          | 0.0297               | 0.1376          | 3.0950                          | 0.0260               | 0.1049          | 0.0000                 | 0.0009                 |
| GME     | 15.62                       | 16.47                                 | 1.6027                          | 0.0027               | 0.0076          | 2.6169                          | 0.0283               | 0.0620          | 3.0736                          | 0.0226               | 0.0599          | 0.0000                 | 0.0026                 |
| GON     | 19.35                       | 8.97                                  | 1.5999                          | 0.0035               | 0.0135          | 2.6123                          | 0.0294               | 0.1028          | 3.0822                          | 0.0383               | 0.1203          | 0.0000                 | 0.0026                 |
| GOO     | 18.82                       | 19.12                                 | 1.6059                          | 0.0103               | 0.0371          | 2.6214                          | 0.0559               | 0.2101          | 3.0560                          | 0.0375               | 0.1314          | 0.0007                 | 0.0008                 |
| HEU     | 17.83                       | 12.48                                 | 1.6012                          | 0.0068               | 0.0272          | 2.6144                          | 0.0312               | 0.1212          | 3.0792                          | 0.0348               | 0.1118          | 0.0001                 | 0.0007                 |
| IFO     | 17.34                       | 15.27                                 | 1.6066                          | 0.0102               | 0.0301          | 2.6232                          | 0.0273               | 0.1028          | 3.0504                          | 0.0704               | 0.2172          | 0.0001                 | 0.0018                 |
| IFR     | 17.17                       | 14.95                                 | 1.6044                          | 0.0062               | 0.0237          | 2.6198                          | 0.0213               | 0.0892          | 3.0619                          | 0.0312               | 0.0973          | 0.0001                 | 0.0008                 |
| IFW     | 16.45                       | 13.61                                 | 1.6010                          | 0.0067               | 0.0298          | 2.6141                          | 0.0305               | 0.1259          | 3.0792                          | 0.0405               | 0.1485          | 0.0001                 | 0.0001                 |
| IFY     | 17.47                       | 19.28                                 | 1.6068                          | 0.0089               | 0.0376          | 2.6236                          | 0.0334               | 0.1272          | 3.0511                          | 0.0466               | 0.1806          | 0.0000                 | 0.0002                 |
| IHW     | 18.97                       | 10.90                                 | 1.6007                          | 0.0078               | 0.0380          | 2.6134                          | 0.0309               | 0.1546          | 3.0790                          | 0.0484               | 0.2156          | 0.0002                 | 0.0019                 |
| IMF     | 18.14                       | 11.27                                 | 1.6006                          | 0.0055               | 0.0335          | 2.6135                          | 0.0273               | 0.1303          | 3.0801                          | 0.0407               | 0.1906          | 0.0000                 | 0.0010                 |
| IRN     | 15.90                       | 17.44                                 | 1.6008                          | 0.0067               | 0.0344          | 2.6138                          | 0.0237               | 0.1160          | 3.0825                          | 0.0306               | 0.1302          | 0.0001                 | 0.0021                 |
| IRR     | 11.75                       | 24.78                                 | 1.6088                          | 0.0120               | 0.0463          | 2.6269                          | 0.0276               | 0.1028          | 3.0424                          | 0.0726               | 0.2424          | 0.0001                 | 0.0013                 |
| ISV     | 15.37                       | 16.39                                 | 1.6017                          | 0.0089               | 0.0433          | 2.6152                          | 0.0312               | 0.1116          | 3.0783                          | 0.0286               | 0.0944          | 0.0000                 | 0.0025                 |
| ITE     | 16.41                       | 14.08                                 | 1.6011                          | 0.0053               | 0.0176          | 2.6142                          | 0.0277               | 0.0977          | 3.0797                          | 0.0395               | 0.1355          | 0.0000                 | 0.0008                 |
| ITG     | 16.74                       | 13.97                                 | 1.6018                          | 0.0069               | 0.0329          | 2.6154                          | 0.0297               | 0.1423          | 3.0757                          | 0.0316               | 0.1515          | 0.0000                 | 0.0005                 |
| ITH     | 17.69                       | 12.47                                 | 1.5989                          | 0.0074               | 0.0336          | 2.6108                          | 0.0265               | 0.1313          | 3.0893                          | 0.0315               | 0.1233          | 0.0000                 | 0.0001                 |
| ITR     | 17.68                       | 12.49                                 | 1.5989                          | 0.0074               | 0.0344          | 2.6107                          | 0.0267               | 0.1348          | 3.0897                          | 0.0315               | 0.1061          | 0.0000                 | 0.0000                 |
| ITT     | 12.95                       | 19.71                                 | 1.6055                          | 0.0113               | 0.0569          | 2.6215                          | 0.0326               | 0.2133          | 3.0582                          | 0.0612               | 0.1830          | 0.0000                 | 0.0010                 |

| Zeolite | FD<br>(T nm <sup>-3</sup> ) | $\Delta E$<br>(kJ mol <sup>-1</sup> ) | $\langle D_{TO} \rangle$<br>(Å) | $\sigma_{TO}$<br>(Å) | $R_{TO}$<br>(Å) | $\langle D_{OO} \rangle$<br>(Å) | $\sigma_{OO}$<br>(Å) | $R_{OO}$<br>(Å) | $\langle D_{TT} \rangle$<br>(Å) | $\sigma_{TT}$<br>(Å) | $R_{TT}$<br>(Å) | $\epsilon_{OO}$<br>(Å) | $\epsilon_{TT}$<br>(Å) |
|---------|-----------------------------|---------------------------------------|---------------------------------|----------------------|-----------------|---------------------------------|----------------------|-----------------|---------------------------------|----------------------|-----------------|------------------------|------------------------|
| ITW     | 18.39                       | 14.75                                 | 1.6014                          | 0.0068               | 0.0221          | 2.6148                          | 0.0268               | 0.1205          | 3.0779                          | 0.0261               | 0.0867          | 0.0001                 | 0.0004                 |
| IWR     | 15.89                       | 15.53                                 | 1.6029                          | 0.0081               | 0.0368          | 2.6173                          | 0.0251               | 0.1044          | 3.0707                          | 0.0352               | 0.1404          | 0.0001                 | 0.0006                 |
| IWS     | 14.98                       | 17.44                                 | 1.6025                          | 0.0091               | 0.0415          | 2.6166                          | 0.0318               | 0.1535          | 3.0737                          | 0.0456               | 0.1683          | 0.0000                 | 0.0019                 |
| IWV     | 15.80                       | 14.55                                 | 1.6026                          | 0.0084               | 0.0382          | 2.6167                          | 0.0287               | 0.1521          | 3.0710                          | 0.0516               | 0.2122          | 0.0001                 | 0.0002                 |
| IWW     | 16.77                       | 13.84                                 | 1.6017                          | 0.0077               | 0.0343          | 2.6152                          | 0.0313               | 0.1601          | 3.0763                          | 0.0300               | 0.1451          | 0.0000                 | 0.0004                 |
| JBW     | 20.19                       | 9.52                                  | 1.6000                          | 0.0051               | 0.0164          | 2.6126                          | 0.0297               | 0.0961          | 3.0817                          | 0.0085               | 0.0191          | 0.0001                 | 0.0023                 |
| JNT     | 19.94                       | 18.81                                 | 1.6064                          | 0.0111               | 0.0462          | 2.6227                          | 0.0475               | 0.1874          | 3.0511                          | 0.0490               | 0.1606          | 0.0003                 | 0.0016                 |
| JOZ     | 16.40                       | 33.52                                 | 1.6164                          | 0.0185               | 0.0551          | 2.6395                          | 0.0157               | 0.0610          | 3.0017                          | 0.0715               | 0.1984          | 0.0003                 | 0.0020                 |
| JRY     | 19.11                       | 12.96                                 | 1.6009                          | 0.0135               | 0.0475          | 2.6141                          | 0.0275               | 0.1120          | 3.0789                          | 0.0476               | 0.1422          | 0.0002                 | 0.0010                 |
| JSN     | 17.94                       | 16.30                                 | 1.6048                          | 0.0085               | 0.0356          | 2.6205                          | 0.0293               | 0.1180          | 3.0603                          | 0.0346               | 0.1218          | 0.0001                 | 0.0003                 |
| JSR     | 11.99                       | 49.64                                 | 1.6268                          | 0.0038               | 0.0141          | 2.6559                          | 0.0269               | 0.1077          | 2.9516                          | 0.0142               | 0.0480          | 0.0002                 | 0.0014                 |
| JST     | 13.64                       | 54.02                                 | 1.6280                          | 0.0037               | 0.0096          | 2.6581                          | 0.0269               | 0.1021          | 2.9455                          | 0.0093               | 0.0225          | 0.0001                 | 0.0017                 |
| JSW     | 18.66                       | 16.52                                 | 1.6045                          | 0.0091               | 0.0369          | 2.6197                          | 0.0329               | 0.1324          | 3.0624                          | 0.0487               | 0.1464          | 0.0000                 | 0.0000                 |
| KFI     | 15.47                       | 17.21                                 | 1.6026                          | 0.0028               | 0.0065          | 2.6169                          | 0.0312               | 0.0736          | 3.0738                          | 0.0077               | 0.0203          | 0.0001                 | 0.0026                 |
| LAU     | 18.28                       | 14.16                                 | 1.6047                          | 0.0041               | 0.0167          | 2.6203                          | 0.0289               | 0.0964          | 3.0605                          | 0.0245               | 0.0915          | 0.0001                 | 0.0006                 |
| LEV     | 16.48                       | 15.96                                 | 1.6018                          | 0.0062               | 0.0182          | 2.6155                          | 0.0345               | 0.0953          | 3.0770                          | 0.0247               | 0.0769          | 0.0001                 | 0.0018                 |
| LIO     | 17.93                       | 13.12                                 | 1.5988                          | 0.0058               | 0.0206          | 2.6107                          | 0.0246               | 0.0762          | 3.0905                          | 0.0175               | 0.0557          | 0.0001                 | 0.0005                 |
| LOS     | 17.90                       | 13.21                                 | 1.5983                          | 0.0049               | 0.0177          | 2.6099                          | 0.0262               | 0.0754          | 3.0932                          | 0.0170               | 0.0471          | 0.0001                 | 0.0009                 |
| LOV     | 17.38                       | 24.70                                 | 1.6083                          | 0.0128               | 0.0406          | 2.6261                          | 0.0256               | 0.0875          | 3.0440                          | 0.0642               | 0.2058          | 0.0001                 | 0.0005                 |
| LTA     | 14.50                       | 19.21                                 | 1.6004                          | 0.0069               | 0.0168          | 2.6133                          | 0.0213               | 0.0629          | 3.0857                          | 0.0125               | 0.0308          | 0.0002                 | 0.0034                 |
| LTF     | 17.35                       | 16.86                                 | 1.6044                          | 0.0088               | 0.0394          | 2.6197                          | 0.0312               | 0.1001          | 3.0630                          | 0.0341               | 0.1512          | 0.0001                 | 0.0002                 |
| LTJ     | 19.00                       | 14.72                                 | 1.6026                          | 0.0034               | 0.0105          | 2.6167                          | 0.0380               | 0.1239          | 3.0721                          | 0.0352               | 0.1169          | 0.0001                 | 0.0007                 |
| LTL     | 17.06                       | 18.06                                 | 1.6052                          | 0.0060               | 0.0189          | 2.6210                          | 0.0247               | 0.0700          | 3.0584                          | 0.0277               | 0.1073          | 0.0001                 | 0.0004                 |
| LTN     | 17.11                       | 14.85                                 | 1.5991                          | 0.0064               | 0.0185          | 2.6111                          | 0.0316               | 0.1033          | 3.0901                          | 0.0331               | 0.0883          | 0.0001                 | 0.0014                 |
| MAR     | 17.90                       | 13.10                                 | 1.5985                          | 0.0052               | 0.0213          | 2.6101                          | 0.0266               | 0.0739          | 3.0925                          | 0.0155               | 0.0593          | 0.0001                 | 0.0007                 |
| MAZ     | 17.18                       | 17.07                                 | 1.6055                          | 0.0088               | 0.0359          | 2.6215                          | 0.0308               | 0.0846          | 3.0572                          | 0.0373               | 0.1360          | 0.0001                 | 0.0003                 |
| MEI     | 14.82                       | 18.80                                 | 1.6063                          | 0.0093               | 0.0404          | 2.6228                          | 0.0290               | 0.1090          | 3.0545                          | 0.0454               | 0.2087          | 0.0001                 | 0.0009                 |
| MEL     | 18.09                       | 10.39                                 | 1.6004                          | 0.0053               | 0.0220          | 2.6130                          | 0.0337               | 0.1475          | 3.0811                          | 0.0357               | 0.1266          | 0.0002                 | 0.0010                 |
| MEP     | 19.77                       | 9.19                                  | 1.5975                          | 0.0057               | 0.0251          | 2.6084                          | 0.0236               | 0.1089          | 3.0942                          | 0.0306               | 0.1208          | 0.0000                 | 0.0022                 |
| MER     | 16.96                       | 16.22                                 | 1.6044                          | 0.0031               | 0.0077          | 2.6197                          | 0.0320               | 0.0747          | 3.0642                          | 0.0169               | 0.0443          | 0.0000                 | 0.0016                 |
| MFI     | 18.27                       | 9.64                                  | 1.6006                          | 0.0046               | 0.0222          | 2.6134                          | 0.0303               | 0.1398          | 3.0796                          | 0.0341               | 0.1536          | 0.0001                 | 0.0016                 |

| <b>Zeolite</b> | <b>FD</b><br>(T nm <sup>-3</sup> ) | <b><math>\Delta E</math></b><br>(kJ mol <sup>-1</sup> ) | <b><math>\langle D_{TO} \rangle</math></b><br>(Å) | <b><math>\sigma_{TO}</math></b><br>(Å) | <b><math>R_{TO}</math></b><br>(Å) | <b><math>\langle D_{OO} \rangle</math></b><br>(Å) | <b><math>\sigma_{OO}</math></b><br>(Å) | <b><math>R_{OO}</math></b><br>(Å) | <b><math>\langle D_{TT} \rangle</math></b><br>(Å) | <b><math>\sigma_{TT}</math></b><br>(Å) | <b><math>R_{TT}</math></b><br>(Å) | <b><math>\epsilon_{OO}</math></b><br>(Å) | <b><math>\epsilon_{TT}</math></b><br>(Å) |
|----------------|------------------------------------|---------------------------------------------------------|---------------------------------------------------|----------------------------------------|-----------------------------------|---------------------------------------------------|----------------------------------------|-----------------------------------|---------------------------------------------------|----------------------------------------|-----------------------------------|------------------------------------------|------------------------------------------|
| <b>MFS</b>     | 18.41                              | 12.50                                                   | 1.6000                                            | 0.0074                                 | 0.0336                            | 2.6124                                            | 0.0288                                 | 0.1392                            | 3.0840                                            | 0.0443                                 | 0.1772                            | 0.0001                                   | 0.0002                                   |
| <b>MON</b>     | 18.95                              | 13.38                                                   | 1.6034                                            | 0.0070                                 | 0.0165                            | 2.6180                                            | 0.0255                                 | 0.0712                            | 3.0678                                            | 0.0306                                 | 0.0673                            | 0.0000                                   | 0.0001                                   |
| <b>MOR</b>     | 17.75                              | 12.24                                                   | 1.5988                                            | 0.0043                                 | 0.0150                            | 2.6105                                            | 0.0303                                 | 0.1128                            | 3.0906                                            | 0.0407                                 | 0.1292                            | 0.0000                                   | 0.0004                                   |
| <b>MOZ</b>     | 17.30                              | 17.65                                                   | 1.6042                                            | 0.0070                                 | 0.0354                            | 2.6194                                            | 0.0269                                 | 0.0868                            | 3.0638                                            | 0.0272                                 | 0.1749                            | 0.0000                                   | 0.0002                                   |
| <b>MRE</b>     | 20.18                              | 7.66                                                    | 1.6005                                            | 0.0060                                 | 0.0237                            | 2.6134                                            | 0.0203                                 | 0.0919                            | 3.0777                                            | 0.0383                                 | 0.1369                            | 0.0001                                   | 0.0039                                   |
| <b>MSE</b>     | 16.83                              | 13.45                                                   | 1.6008                                            | 0.0082                                 | 0.0401                            | 2.6137                                            | 0.0339                                 | 0.1583                            | 3.0809                                            | 0.0410                                 | 0.1694                            | 0.0001                                   | 0.0007                                   |
| <b>MSO</b>     | 18.71                              | 11.95                                                   | 1.6003                                            | 0.0043                                 | 0.0191                            | 2.6130                                            | 0.0321                                 | 0.1102                            | 3.0819                                            | 0.0091                                 | 0.0319                            | 0.0000                                   | 0.0009                                   |
| <b>MTF</b>     | 21.37                              | 8.50                                                    | 1.6009                                            | 0.0067                                 | 0.0357                            | 2.6138                                            | 0.0353                                 | 0.1360                            | 3.0774                                            | 0.0394                                 | 0.1586                            | 0.0002                                   | 0.0024                                   |
| <b>MTN</b>     | 19.31                              | 10.20                                                   | 1.5970                                            | 0.0053                                 | 0.0265                            | 2.6076                                            | 0.0250                                 | 0.1274                            | 3.0974                                            | 0.0379                                 | 0.1610                            | 0.0001                                   | 0.0014                                   |
| <b>MTT</b>     | 19.77                              | 8.71                                                    | 1.6002                                            | 0.0047                                 | 0.0205                            | 2.6129                                            | 0.0262                                 | 0.1096                            | 3.0802                                            | 0.0291                                 | 0.0919                            | 0.0000                                   | 0.0031                                   |
| <b>MTW</b>     | 19.03                              | 9.18                                                    | 1.5999                                            | 0.0046                                 | 0.0233                            | 2.6123                                            | 0.0287                                 | 0.1291                            | 3.0822                                            | 0.0404                                 | 0.1666                            | 0.0000                                   | 0.0025                                   |
| <b>MVY</b>     | 21.04                              | 18.89                                                   | 1.6104                                            | 0.0087                                 | 0.0309                            | 2.6289                                            | 0.0381                                 | 0.1519                            | 3.0307                                            | 0.0727                                 | 0.2416                            | 0.0004                                   | 0.0028                                   |
| <b>MWF</b>     | 16.65                              | 16.27                                                   | 1.6039                                            | 0.0050                                 | 0.0187                            | 2.6187                                            | 0.0337                                 | 0.1073                            | 3.0673                                            | 0.0111                                 | 0.0493                            | 0.0001                                   | 0.0019                                   |
| <b>MWW</b>     | 16.62                              | 14.33                                                   | 1.6011                                            | 0.0081                                 | 0.0455                            | 2.6142                                            | 0.0280                                 | 0.1045                            | 3.0804                                            | 0.0512                                 | 0.1824                            | 0.0001                                   | 0.0015                                   |
| <b>NAB</b>     | 16.23                              | 32.74                                                   | 1.6141                                            | 0.0140                                 | 0.0304                            | 2.6355                                            | 0.0146                                 | 0.0369                            | 3.0153                                            | 0.0660                                 | 0.1368                            | 0.0001                                   | 0.0001                                   |
| <b>NAT</b>     | 17.61                              | 21.41                                                   | 1.6076                                            | 0.0091                                 | 0.0261                            | 2.6251                                            | 0.0227                                 | 0.0711                            | 3.0500                                            | 0.0116                                 | 0.0310                            | 0.0002                                   | 0.0031                                   |
| <b>NES</b>     | 17.78                              | 12.74                                                   | 1.6014                                            | 0.0097                                 | 0.0411                            | 2.6145                                            | 0.0368                                 | 0.1806                            | 3.0766                                            | 0.0512                                 | 0.2506                            | 0.0003                                   | 0.0006                                   |
| <b>NON</b>     | 19.50                              | 9.79                                                    | 1.5979                                            | 0.0076                                 | 0.0405                            | 2.6091                                            | 0.0254                                 | 0.1257                            | 3.0924                                            | 0.0377                                 | 0.1832                            | 0.0000                                   | 0.0020                                   |
| <b>NPO</b>     | 17.44                              | 24.18                                                   | 1.6128                                            | 0.0140                                 | 0.0309                            | 2.6335                                            | 0.0188                                 | 0.0585                            | 3.0172                                            | 0.0527                                 | 0.1124                            | 0.0001                                   | 0.0041                                   |
| <b>NPT</b>     | 13.42                              | 41.65                                                   | 1.6198                                            | 0.0127                                 | 0.0366                            | 2.6450                                            | 0.0172                                 | 0.0487                            | 2.9873                                            | 0.0600                                 | 0.1621                            | 0.0002                                   | 0.0002                                   |
| <b>NSI</b>     | 20.96                              | 6.94                                                    | 1.6004                                            | 0.0055                                 | 0.0184                            | 2.6131                                            | 0.0281                                 | 0.1180                            | 3.0781                                            | 0.0321                                 | 0.0909                            | 0.0001                                   | 0.0040                                   |
| <b>OBW</b>     | 12.53                              | 46.51                                                   | 1.6239                                            | 0.0073                                 | 0.0360                            | 2.6517                                            | 0.0152                                 | 0.0525                            | 2.9671                                            | 0.0384                                 | 0.1806                            | 0.0003                                   | 0.0000                                   |
| <b>OFF</b>     | 16.50                              | 16.73                                                   | 1.6020                                            | 0.0080                                 | 0.0292                            | 2.6158                                            | 0.0298                                 | 0.0762                            | 3.0761                                            | 0.0284                                 | 0.0986                            | 0.0000                                   | 0.0016                                   |
| <b>OKO</b>     | 17.76                              | 13.84                                                   | 1.6022                                            | 0.0081                                 | 0.0402                            | 2.6156                                            | 0.0412                                 | 0.2095                            | 3.0729                                            | 0.0590                                 | 0.2268                            | 0.0005                                   | 0.0003                                   |
| <b>OSI</b>     | 19.07                              | 9.70                                                    | 1.6018                                            | 0.0062                                 | 0.0242                            | 2.6156                                            | 0.0210                                 | 0.0717                            | 3.0721                                            | 0.0094                                 | 0.0318                            | 0.0001                                   | 0.0032                                   |
| <b>OSO</b>     | 12.80                              | 55.42                                                   | 1.6284                                            | 0.0015                                 | 0.0035                            | 2.6588                                            | 0.0407                                 | 0.1197                            | 2.9435                                            | 0.0011                                 | 0.0023                            | 0.0000                                   | 0.0015                                   |
| <b>OWE</b>     | 17.72                              | 15.94                                                   | 1.6028                                            | 0.0093                                 | 0.0349                            | 2.6171                                            | 0.0300                                 | 0.1003                            | 3.0723                                            | 0.0312                                 | 0.1116                            | 0.0001                                   | 0.0016                                   |
| <b>PAU</b>     | 16.50                              | 16.51                                                   | 1.6041                                            | 0.0047                                 | 0.0169                            | 2.6192                                            | 0.0339                                 | 0.1031                            | 3.0659                                            | 0.0106                                 | 0.0381                            | 0.0000                                   | 0.0020                                   |
| <b>PCR</b>     | 19.31                              | 10.35                                                   | 1.5981                                            | 0.0061                                 | 0.0269                            | 2.6093                                            | 0.0333                                 | 0.1689                            | 3.0926                                            | 0.0401                                 | 0.1540                            | 0.0001                                   | 0.0009                                   |
| <b>PHI</b>     | 17.00                              | 15.69                                                   | 1.6038                                            | 0.0031                                 | 0.0087                            | 2.6186                                            | 0.0319                                 | 0.0874                            | 3.0674                                            | 0.0169                                 | 0.0528                            | 0.0000                                   | 0.0018                                   |
| <b>PON</b>     | 18.39                              | 15.49                                                   | 1.6031                                            | 0.0101                                 | 0.0391                            | 2.6175                                            | 0.0334                                 | 0.1283                            | 3.0696                                            | 0.0571                                 | 0.1777                            | 0.0001                                   | 0.0005                                   |

| <b>Zeolite</b> | <b>FD</b><br>(T nm <sup>-3</sup> ) | <b><math>\Delta E</math></b><br>(kJ mol <sup>-1</sup> ) | <b><math>\langle D_{TO} \rangle</math></b><br>(Å) | <b><math>\sigma_{TO}</math></b><br>(Å) | <b><math>R_{TO}</math></b><br>(Å) | <b><math>\langle D_{OO} \rangle</math></b><br>(Å) | <b><math>\sigma_{OO}</math></b><br>(Å) | <b><math>R_{OO}</math></b><br>(Å) | <b><math>\langle D_{TT} \rangle</math></b><br>(Å) | <b><math>\sigma_{TT}</math></b><br>(Å) | <b><math>R_{TT}</math></b><br>(Å) | <b><math>\epsilon_{OO}</math></b><br>(Å) | <b><math>\epsilon_{TT}</math></b><br>(Å) |
|----------------|------------------------------------|---------------------------------------------------------|---------------------------------------------------|----------------------------------------|-----------------------------------|---------------------------------------------------|----------------------------------------|-----------------------------------|---------------------------------------------------|----------------------------------------|-----------------------------------|------------------------------------------|------------------------------------------|
| <b>POS</b>     | 15.83                              | 16.61                                                   | 1.6017                                            | 0.0103                                 | 0.0418                            | 2.6154                                            | 0.0258                                 | 0.1047                            | 3.0767                                            | 0.0476                                 | 0.1942                            | 0.0001                                   | 0.0009                                   |
| <b>PSI</b>     | 20.52                              | 9.27                                                    | 1.6004                                            | 0.0070                                 | 0.0300                            | 2.6132                                            | 0.0225                                 | 0.1322                            | 3.0793                                            | 0.0320                                 | 0.1313                            | 0.0001                                   | 0.0031                                   |
| <b>PUN</b>     | 15.12                              | 30.67                                                   | 1.6158                                            | 0.0114                                 | 0.0358                            | 2.6381                                            | 0.0256                                 | 0.1023                            | 3.0071                                            | 0.0538                                 | 0.1759                            | 0.0001                                   | 0.0001                                   |
| <b>RHO</b>     | 14.89                              | 18.24                                                   | 1.6055                                            | 0.0023                                 | 0.0049                            | 2.6215                                            | 0.0363                                 | 0.0826                            | 3.0594                                            | 0.0017                                 | 0.0037                            | 0.0001                                   | 0.0022                                   |
| <b>RRO</b>     | 18.04                              | 15.32                                                   | 1.6008                                            | 0.0109                                 | 0.0380                            | 2.6134                                            | 0.0467                                 | 0.2747                            | 3.0817                                            | 0.0569                                 | 0.1753                            | 0.0003                                   | 0.0012                                   |
| <b>RSN</b>     | 17.41                              | 24.67                                                   | 1.6086                                            | 0.0129                                 | 0.0418                            | 2.6266                                            | 0.0254                                 | 0.0919                            | 3.0427                                            | 0.0626                                 | 0.2029                            | 0.0001                                   | 0.0004                                   |
| <b>RTE</b>     | 17.58                              | 12.64                                                   | 1.6001                                            | 0.0064                                 | 0.0224                            | 2.6126                                            | 0.0305                                 | 0.1018                            | 3.0840                                            | 0.0216                                 | 0.0705                            | 0.0000                                   | 0.0001                                   |
| <b>RTH</b>     | 16.43                              | 13.95                                                   | 1.6009                                            | 0.0052                                 | 0.0159                            | 2.6139                                            | 0.0281                                 | 0.1069                            | 3.0807                                            | 0.0387                                 | 0.1303                            | 0.0001                                   | 0.0008                                   |
| <b>RUT</b>     | 18.28                              | 12.35                                                   | 1.5992                                            | 0.0048                                 | 0.0174                            | 2.6112                                            | 0.0301                                 | 0.1043                            | 3.0882                                            | 0.0203                                 | 0.0632                            | 0.0000                                   | 0.0002                                   |
| <b>RWR</b>     | 20.19                              | 13.47                                                   | 1.6025                                            | 0.0098                                 | 0.0298                            | 2.6164                                            | 0.0292                                 | 0.1064                            | 3.0694                                            | 0.0506                                 | 0.1375                            | 0.0002                                   | 0.0024                                   |
| <b>SAF</b>     | 19.31                              | 10.06                                                   | 1.6014                                            | 0.0070                                 | 0.0239                            | 2.6148                                            | 0.0207                                 | 0.0836                            | 3.0747                                            | 0.0394                                 | 0.1286                            | 0.0001                                   | 0.0028                                   |
| <b>SAO</b>     | 14.16                              | 20.42                                                   | 1.6070                                            | 0.0079                                 | 0.0277                            | 2.6240                                            | 0.0333                                 | 0.1327                            | 3.0516                                            | 0.0331                                 | 0.1298                            | 0.0000                                   | 0.0018                                   |
| <b>SAS</b>     | 16.00                              | 15.85                                                   | 1.6003                                            | 0.0036                                 | 0.0091                            | 2.6131                                            | 0.0301                                 | 0.0826                            | 3.0848                                            | 0.0161                                 | 0.0572                            | 0.0000                                   | 0.0022                                   |
| <b>SAT</b>     | 16.90                              | 15.68                                                   | 1.6012                                            | 0.0087                                 | 0.0287                            | 2.6145                                            | 0.0288                                 | 0.0863                            | 3.0795                                            | 0.0323                                 | 0.0967                            | 0.0001                                   | 0.0011                                   |
| <b>SAV</b>     | 15.54                              | 17.20                                                   | 1.6028                                            | 0.0049                                 | 0.0150                            | 2.6170                                            | 0.0328                                 | 0.1002                            | 3.0732                                            | 0.0141                                 | 0.0650                            | 0.0000                                   | 0.0026                                   |
| <b>SBE</b>     | 13.97                              | 18.87                                                   | 1.6067                                            | 0.0047                                 | 0.0194                            | 2.6236                                            | 0.0261                                 | 0.1114                            | 3.0526                                            | 0.0336                                 | 0.0986                            | 0.0001                                   | 0.0015                                   |
| <b>SBN</b>     | 16.38                              | 28.28                                                   | 1.6102                                            | 0.0135                                 | 0.0483                            | 2.6293                                            | 0.0161                                 | 0.0526                            | 3.0373                                            | 0.0574                                 | 0.1930                            | 0.0002                                   | 0.0028                                   |
| <b>SBS</b>     | 13.90                              | 20.09                                                   | 1.6074                                            | 0.0055                                 | 0.0214                            | 2.6247                                            | 0.0203                                 | 0.0833                            | 3.0500                                            | 0.0425                                 | 0.1251                            | 0.0002                                   | 0.0019                                   |
| <b>SBT</b>     | 13.90                              | 19.93                                                   | 1.6075                                            | 0.0052                                 | 0.0193                            | 2.6249                                            | 0.0199                                 | 0.0739                            | 3.0491                                            | 0.0407                                 | 0.1171                            | 0.0002                                   | 0.0017                                   |
| <b>SEW</b>     | 16.68                              | 13.86                                                   | 1.6015                                            | 0.0089                                 | 0.0436                            | 2.6149                                            | 0.0328                                 | 0.1424                            | 3.0768                                            | 0.0479                                 | 0.1662                            | 0.0001                                   | 0.0001                                   |
| <b>SFE</b>     | 18.40                              | 11.31                                                   | 1.6035                                            | 0.0073                                 | 0.0329                            | 2.6183                                            | 0.0268                                 | 0.0958                            | 3.0645                                            | 0.0465                                 | 0.2075                            | 0.0000                                   | 0.0024                                   |
| <b>SFF</b>     | 17.65                              | 13.49                                                   | 1.6032                                            | 0.0055                                 | 0.0281                            | 2.6176                                            | 0.0351                                 | 0.1516                            | 3.0676                                            | 0.0407                                 | 0.1764                            | 0.0002                                   | 0.0006                                   |
| <b>SFG</b>     | 18.23                              | 10.49                                                   | 1.5994                                            | 0.0055                                 | 0.0283                            | 2.6115                                            | 0.0257                                 | 0.1461                            | 3.0859                                            | 0.0351                                 | 0.1350                            | 0.0000                                   | 0.0013                                   |
| <b>SFH</b>     | 17.56                              | 12.05                                                   | 1.6027                                            | 0.0071                                 | 0.0286                            | 2.6170                                            | 0.0241                                 | 0.1008                            | 3.0693                                            | 0.0493                                 | 0.2038                            | 0.0001                                   | 0.0017                                   |
| <b>SFN</b>     | 17.62                              | 11.46                                                   | 1.6035                                            | 0.0069                                 | 0.0296                            | 2.6182                                            | 0.0247                                 | 0.1170                            | 3.0650                                            | 0.0510                                 | 0.1950                            | 0.0001                                   | 0.0022                                   |
| <b>SFO</b>     | 15.49                              | 16.58                                                   | 1.6053                                            | 0.0057                                 | 0.0231                            | 2.6212                                            | 0.0226                                 | 0.0742                            | 3.0595                                            | 0.0309                                 | 0.1021                            | 0.0001                                   | 0.0011                                   |
| <b>SFS</b>     | 16.94                              | 12.10                                                   | 1.6007                                            | 0.0048                                 | 0.0210                            | 2.6135                                            | 0.0320                                 | 0.1323                            | 3.0805                                            | 0.0430                                 | 0.1754                            | 0.0001                                   | 0.0004                                   |
| <b>SFV</b>     | 17.93                              | 10.86                                                   | 1.5997                                            | 0.0048                                 | 0.0245                            | 2.6118                                            | 0.0320                                 | 0.1596                            | 3.0851                                            | 0.0376                                 | 0.1653                            | 0.0002                                   | 0.0006                                   |
| <b>SFW</b>     | 15.61                              | 16.40                                                   | 1.6027                                            | 0.0028                                 | 0.0089                            | 2.6169                                            | 0.0289                                 | 0.0692                            | 3.0736                                            | 0.0206                                 | 0.0592                            | 0.0000                                   | 0.0026                                   |
| <b>SGT</b>     | 18.08                              | 12.88                                                   | 1.5993                                            | 0.0073                                 | 0.0267                            | 2.6116                                            | 0.0162                                 | 0.0572                            | 3.0869                                            | 0.0494                                 | 0.1706                            | 0.0002                                   | 0.0008                                   |
| <b>SIV</b>     | 17.06                              | 15.33                                                   | 1.6032                                            | 0.0028                                 | 0.0100                            | 2.6176                                            | 0.0318                                 | 0.0847                            | 3.0706                                            | 0.0183                                 | 0.0574                            | 0.0001                                   | 0.0020                                   |

| Zeolite | FD<br>(T nm <sup>-3</sup> ) | $\Delta E$<br>(kJ mol <sup>-1</sup> ) | $\langle D_{TO} \rangle$<br>(Å) | $\sigma_{TO}$<br>(Å) | $R_{TO}$<br>(Å) | $\langle D_{OO} \rangle$<br>(Å) | $\sigma_{OO}$<br>(Å) | $R_{OO}$<br>(Å) | $\langle D_{TT} \rangle$<br>(Å) | $\sigma_{TT}$<br>(Å) | $R_{TT}$<br>(Å) | $\epsilon_{OO}$<br>(Å) | $\epsilon_{TT}$<br>(Å) |
|---------|-----------------------------|---------------------------------------|---------------------------------|----------------------|-----------------|---------------------------------|----------------------|-----------------|---------------------------------|----------------------|-----------------|------------------------|------------------------|
| SOD     | 17.81                       | 13.05                                 | 1.5972                          | 0.0000               | 0.0001          | 2.6080                          | 0.0310               | 0.0660          | 3.0996                          | 0.0000               | 0.0001          | 0.0001                 | 0.0015                 |
| SOF     | 16.98                       | 18.65                                 | 1.6055                          | 0.0070               | 0.0302          | 2.6215                          | 0.0234               | 0.1284          | 3.0581                          | 0.0367               | 0.1110          | 0.0001                 | 0.0007                 |
| SOS     | 17.20                       | 45.77                                 | 1.6241                          | 0.0196               | 0.0636          | 2.6508                          | 0.0440               | 0.1748          | 2.9636                          | 0.0889               | 0.3334          | 0.0010                 | 0.0024                 |
| SSF     | 17.31                       | 12.34                                 | 1.6001                          | 0.0041               | 0.0173          | 2.6126                          | 0.0301               | 0.1027          | 3.0830                          | 0.0413               | 0.1332          | 0.0001                 | 0.0005                 |
| SSY     | 18.45                       | 11.30                                 | 1.6038                          | 0.0071               | 0.0334          | 2.6187                          | 0.0277               | 0.1266          | 3.0634                          | 0.0451               | 0.1924          | 0.0000                 | 0.0024                 |
| STF     | 17.75                       | 13.17                                 | 1.6039                          | 0.0056               | 0.0247          | 2.6187                          | 0.0329               | 0.1348          | 3.0641                          | 0.0392               | 0.1605          | 0.0001                 | 0.0010                 |
| STI     | 17.17                       | 14.70                                 | 1.6029                          | 0.0073               | 0.0323          | 2.6174                          | 0.0294               | 0.1404          | 3.0714                          | 0.0322               | 0.1305          | 0.0001                 | 0.0015                 |
| STO     | 18.72                       | 9.65                                  | 1.6000                          | 0.0054               | 0.0237          | 2.6126                          | 0.0226               | 0.1152          | 3.0820                          | 0.0316               | 0.1591          | 0.0000                 | 0.0020                 |
| STT     | 16.91                       | 14.66                                 | 1.6008                          | 0.0074               | 0.0377          | 2.6135                          | 0.0334               | 0.1650          | 3.0815                          | 0.0475               | 0.1997          | 0.0002                 | 0.0011                 |
| STW     | 16.46                       | 19.94                                 | 1.6040                          | 0.0064               | 0.0287          | 2.6189                          | 0.0310               | 0.1207          | 3.0670                          | 0.0513               | 0.1649          | 0.0001                 | 0.0021                 |
| SVV     | 17.99                       | 13.72                                 | 1.5999                          | 0.0053               | 0.0177          | 2.6123                          | 0.0267               | 0.1096          | 3.0851                          | 0.0187               | 0.0641          | 0.0001                 | 0.0002                 |
| SZR     | 18.44                       | 12.64                                 | 1.5999                          | 0.0051               | 0.0177          | 2.6123                          | 0.0317               | 0.1123          | 3.0845                          | 0.0310               | 0.1369          | 0.0001                 | 0.0001                 |
| TER     | 17.93                       | 12.27                                 | 1.6008                          | 0.0060               | 0.0252          | 2.6138                          | 0.0290               | 0.1471          | 3.0800                          | 0.0438               | 0.1913          | 0.0001                 | 0.0002                 |
| THO     | 16.64                       | 22.54                                 | 1.6045                          | 0.0135               | 0.0369          | 2.6202                          | 0.0192               | 0.0752          | 3.0664                          | 0.0453               | 0.1182          | 0.0003                 | 0.0044                 |
| TOL     | 17.87                       | 13.44                                 | 1.5973                          | 0.0073               | 0.0336          | 2.6081                          | 0.0298               | 0.1503          | 3.0985                          | 0.0257               | 0.1035          | 0.0000                 | 0.0011                 |
| TON     | 19.79                       | 8.32                                  | 1.6002                          | 0.0033               | 0.0160          | 2.6128                          | 0.0240               | 0.0847          | 3.0803                          | 0.0241               | 0.0721          | 0.0001                 | 0.0031                 |
| TSC     | 13.55                       | 19.42                                 | 1.6051                          | 0.0048               | 0.0135          | 2.6209                          | 0.0279               | 0.0760          | 3.0615                          | 0.0287               | 0.1020          | 0.0001                 | 0.0021                 |
| TUN     | 17.79                       | 11.90                                 | 1.6011                          | 0.0057               | 0.0257          | 2.6142                          | 0.0310               | 0.1397          | 3.0782                          | 0.0424               | 0.2263          | 0.0001                 | 0.0007                 |
| UEI     | 18.54                       | 14.18                                 | 1.6022                          | 0.0079               | 0.0255          | 2.6159                          | 0.0389               | 0.1498          | 3.0735                          | 0.0366               | 0.1407          | 0.0002                 | 0.0001                 |
| UFI     | 15.67                       | 16.93                                 | 1.6004                          | 0.0065               | 0.0202          | 2.6133                          | 0.0273               | 0.0959          | 3.0840                          | 0.0373               | 0.0949          | 0.0001                 | 0.0020                 |
| UOS     | 17.98                       | 15.48                                 | 1.6007                          | 0.0085               | 0.0258          | 2.6136                          | 0.0228               | 0.0928          | 3.0818                          | 0.0319               | 0.1234          | 0.0001                 | 0.0008                 |
| UOV     | 16.54                       | 14.74                                 | 1.6023                          | 0.0082               | 0.0429          | 2.6162                          | 0.0313               | 0.1821          | 3.0734                          | 0.0390               | 0.1920          | 0.0000                 | 0.0005                 |
| UOZ     | 19.56                       | 20.55                                 | 1.6088                          | 0.0080               | 0.0292          | 2.6270                          | 0.0197               | 0.0864          | 3.0407                          | 0.0516               | 0.1327          | 0.0001                 | 0.0004                 |
| USI     | 16.03                       | 20.20                                 | 1.6093                          | 0.0073               | 0.0244          | 2.6277                          | 0.0293               | 0.1333          | 3.0391                          | 0.0491               | 0.1668          | 0.0001                 | 0.0003                 |
| UTL     | 15.80                       | 15.26                                 | 1.6030                          | 0.0083               | 0.0356          | 2.6171                          | 0.0346               | 0.1534          | 3.0697                          | 0.0590               | 0.2567          | 0.0002                 | 0.0001                 |
| UWY     | 16.81                       | 13.93                                 | 1.6005                          | 0.0069               | 0.0334          | 2.6133                          | 0.0268               | 0.1651          | 3.0820                          | 0.0394               | 0.1735          | 0.0000                 | 0.0004                 |
| VET     | 20.22                       | 7.91                                  | 1.6035                          | 0.0069               | 0.0239          | 2.6181                          | 0.0284               | 0.1135          | 3.0622                          | 0.0440               | 0.1447          | 0.0000                 | 0.0051                 |
| VFI     | 14.93                       | 19.27                                 | 1.6057                          | 0.0126               | 0.0410          | 2.6214                          | 0.0422               | 0.1746          | 3.0569                          | 0.0742               | 0.1894          | 0.0004                 | 0.0007                 |
| VNI     | 17.99                       | 22.68                                 | 1.6074                          | 0.0146               | 0.0511          | 2.6246                          | 0.0273               | 0.1232          | 3.0476                          | 0.0610               | 0.2144          | 0.0001                 | 0.0005                 |
| VSV     | 17.54                       | 24.49                                 | 1.6095                          | 0.0121               | 0.0371          | 2.6281                          | 0.0248               | 0.1009          | 3.0376                          | 0.0588               | 0.1551          | 0.0001                 | 0.0001                 |
| WEI     | 16.21                       | 34.54                                 | 1.6181                          | 0.0098               | 0.0255          | 2.6422                          | 0.0156               | 0.0647          | 2.9941                          | 0.0404               | 0.0978          | 0.0002                 | 0.0016                 |



| <b>Zeolite</b> | FD<br>(T nm <sup>-3</sup> ) | $\Delta E$<br>(kJ mol <sup>-1</sup> ) | $\langle D_{TO} \rangle$<br>(Å) | $\sigma_{TO}$<br>(Å) | $R_{TO}$<br>(Å) | $\langle D_{OO} \rangle$<br>(Å) | $\sigma_{OO}$<br>(Å) | $R_{OO}$<br>(Å) | $\langle D_{TT} \rangle$<br>(Å) | $\sigma_{TT}$<br>(Å) | $R_{TT}$<br>(Å) | $\epsilon_{OO}$<br>(Å) | $\epsilon_{TT}$<br>(Å) |
|----------------|-----------------------------|---------------------------------------|---------------------------------|----------------------|-----------------|---------------------------------|----------------------|-----------------|---------------------------------|----------------------|-----------------|------------------------|------------------------|
| <b>YUG</b>     | 18.91                       | 11.66                                 | 1.6005                          | 0.0049               | 0.0198          | 2.6133                          | 0.0319               | 0.1063          | 3.0810                          | 0.0310               | 0.1017          | 0.0000                 | 0.0007                 |
| <b>ZON</b>     | 17.92                       | 16.52                                 | 1.6047                          | 0.0084               | 0.0354          | 2.6203                          | 0.0288               | 0.1187          | 3.0610                          | 0.0347               | 0.1279          | 0.0001                 | 0.0001                 |

**Table S2.** Framework densities, framework energies relative to  $\alpha$ -quartz, FD– $\Delta E$  offsets, and local interatomic distances for 941 hypothetical zeolites selected from Deem\_PCOD database. Unfeasible structures detected by the LID criteria are underlined.

| Structure code            | FD<br>(T nm <sup>-3</sup> ) | $\Delta E$<br>(kJ mol <sup>-1</sup> ) | $\nu$<br>(T nm <sup>-3</sup> ) | $\langle D_{TO} \rangle$<br>(Å) | $\sigma_{TO}$<br>(Å) | $\langle D_{OO} \rangle$<br>(Å) | $\sigma_{OO}$<br>(Å) | $\langle D_{TT} \rangle$<br>(Å) | $\sigma_{TT}$<br>(Å) | $R_{TO}$<br>(Å) | $R_{OO}$<br>(Å) | $R_{TT}$<br>(Å) | $\epsilon_{OO}$<br>(Å) | $\epsilon_{TT}$<br>(Å) |
|---------------------------|-----------------------------|---------------------------------------|--------------------------------|---------------------------------|----------------------|---------------------------------|----------------------|---------------------------------|----------------------|-----------------|-----------------|-----------------|------------------------|------------------------|
| <b>PCOD8312971</b>        | 10.06                       | 27.68                                 | 1.35                           | 1.6098                          | 0.0099               | 2.6287                          | 0.0232               | 3.0391                          | 0.0748               | 0.0320          | 0.1005          | 0.2065          | 0.0002                 | 0.0029                 |
| <b>PCOD8329332</b>        | 10.19                       | 19.61                                 | 4.03                           | 1.6042                          | 0.0057               | 2.6195                          | 0.0209               | 3.0667                          | 0.0597               | 0.0182          | 0.0728          | 0.1745          | 0.0001                 | 0.0030                 |
| <b>PCOD8322921</b>        | 10.20                       | 22.95                                 | 1.74                           | 1.6060                          | 0.0106               | 2.6224                          | 0.0274               | 3.0569                          | 0.0720               | 0.0376          | 0.0957          | 0.2196          | 0.0001                 | 0.0021                 |
| <b>PCOD8321585</b>        | 10.21                       | 19.33                                 | 4.21                           | 1.6022                          | 0.0081               | 2.6163                          | 0.0187               | 3.0763                          | 0.0688               | 0.0251          | 0.0900          | 0.1771          | 0.0002                 | 0.0030                 |
| <b>PCOD8326122</b>        | 10.27                       | 23.01                                 | 1.63                           | 1.6097                          | 0.0115               | 2.6284                          | 0.0283               | 3.0405                          | 0.0865               | 0.0327          | 0.1268          | 0.2336          | 0.0001                 | 0.0036                 |
| <b>PCOD8330856</b>        | 10.27                       | 29.47                                 | 2.79                           | 1.6105                          | 0.0150               | 2.6295                          | 0.0402               | 3.0337                          | 0.0884               | 0.0443          | 0.1548          | 0.2635          | 0.0000                 | 0.0007                 |
| <b>PCOD8200794</b>        | 10.29                       | 27.04                                 | 1.15                           | 1.6087                          | 0.0110               | 2.6268                          | 0.0305               | 3.0444                          | 0.0773               | 0.0377          | 0.1398          | 0.2546          | 0.0001                 | 0.0029                 |
| <b>PCOD8329851</b>        | 10.38                       | 23.90                                 | 0.91                           | 1.6070                          | 0.0140               | 2.6236                          | 0.0374               | 3.0514                          | 0.0758               | 0.0469          | 0.1249          | 0.2515          | 0.0002                 | 0.0013                 |
| <u><b>PCOD8327563</b></u> | 10.40                       | 23.78                                 | 0.97                           | 1.6051                          | 0.0100               | 2.6204                          | 0.0426               | 3.0633                          | <u>0.0896</u>        | 0.0444          | 0.1992          | 0.2763          | 0.0004                 | 0.0041                 |
| <b>PCOD8292630</b>        | 10.42                       | 27.62                                 | 1.68                           | 1.6092                          | 0.0137               | 2.6273                          | 0.0442               | 3.0425                          | 0.0802               | 0.0579          | 0.2187          | 0.2396          | 0.0002                 | 0.0033                 |
| <b>PCOD8196363</b>        | 10.47                       | 27.18                                 | 1.43                           | 1.6082                          | 0.0115               | 2.6261                          | 0.0255               | 3.0467                          | 0.0828               | 0.0363          | 0.1294          | 0.2500          | 0.0002                 | 0.0029                 |
| <b>PCOD8200851</b>        | 10.53                       | 23.18                                 | 1.25                           | 1.6070                          | 0.0083               | 2.6241                          | 0.0211               | 3.0525                          | 0.0709               | 0.0324          | 0.0855          | 0.2366          | 0.0002                 | 0.0026                 |
| <b>PCOD8200684</b>        | 10.55                       | 29.85                                 | 3.33                           | 1.6105                          | 0.0121               | 2.6295                          | 0.0353               | 3.0360                          | 0.0868               | 0.0542          | 0.2537          | 0.3268          | 0.0000                 | 0.0030                 |
| <b>PCOD8313092</b>        | 10.56                       | 28.92                                 | 2.71                           | 1.6090                          | 0.0104               | 2.6273                          | 0.0277               | 3.0433                          | 0.0783               | 0.0326          | 0.1216          | 0.2099          | 0.0001                 | 0.0032                 |
| <u><b>PCOD8321996</b></u> | 10.61                       | 26.92                                 | 1.39                           | 1.6039                          | 0.0112               | 2.6173                          | <u>0.0676</u>        | 3.0704                          | 0.0888               | 0.0378          | <u>0.3186</u>   | 0.2591          | <u>0.0015</u>          | <u>0.0053</u>          |
| <b>PCOD8320054</b>        | 10.64                       | 29.32                                 | 3.07                           | 1.6088                          | 0.0133               | 2.6268                          | 0.0365               | 3.0433                          | 0.0861               | 0.0452          | 0.1625          | 0.2581          | 0.0001                 | 0.0024                 |
| <b>PCOD8315654</b>        | 10.66                       | 29.47                                 | 3.18                           | 1.6118                          | 0.0138               | 2.6317                          | 0.0405               | 3.0265                          | 0.0884               | 0.0554          | 0.2714          | 0.3301          | 0.0001                 | 0.0002                 |
| <b>PCOD8261270</b>        | 10.68                       | 25.31                                 | 0.35                           | 1.6074                          | 0.0099               | 2.6247                          | 0.0265               | 3.0512                          | 0.0712               | 0.0319          | 0.0968          | 0.2098          | 0.0001                 | 0.0033                 |
| <b>PCOD8319194</b>        | 10.69                       | 19.04                                 | 3.93                           | 1.6033                          | 0.0059               | 2.6180                          | 0.0153               | 3.0708                          | 0.0701               | 0.0181          | 0.0858          | 0.1811          | 0.0002                 | 0.0026                 |
| <b>PCOD8274922</b>        | 10.71                       | 27.37                                 | 1.80                           | 1.6091                          | 0.0103               | 2.6275                          | 0.0277               | 3.0428                          | 0.0830               | 0.0361          | 0.1266          | 0.2535          | 0.0001                 | 0.0033                 |
| <u><b>PCOD8320524</b></u> | 10.75                       | 28.38                                 | 2.53                           | 1.6078                          | 0.0126               | 2.6251                          | 0.0341               | 3.0494                          | <u>0.0897</u>        | 0.0411          | 0.1575          | 0.2549          | 0.0001                 | 0.0033                 |
| <b>PCOD8292620</b>        | 10.76                       | 28.73                                 | 2.78                           | 1.6108                          | 0.0106               | 2.6303                          | 0.0271               | 3.0341                          | 0.0875               | 0.0367          | 0.0999          | 0.2476          | 0.0001                 | 0.0029                 |
| <b>PCOD8327293</b>        | 10.77                       | 22.72                                 | 1.33                           | 1.6074                          | 0.0096               | 2.6246                          | 0.0285               | 3.0497                          | 0.0724               | 0.0306          | 0.1082          | 0.2334          | 0.0001                 | 0.0017                 |
| <u><b>PCOD8322015</b></u> | 10.81                       | 29.31                                 | 3.22                           | 1.6124                          | 0.0164               | 2.6319                          | 0.0537               | 3.0267                          | <u>0.1155</u>        | 0.0519          | 0.2001          | 0.3295          | 0.0008                 | 0.0034                 |
| <u><b>PCOD8327476</b></u> | 10.87                       | 28.17                                 | 2.51                           | 1.6111                          | 0.0135               | 2.6305                          | 0.0321               | 3.0317                          | <u>0.0930</u>        | 0.0508          | 0.1338          | 0.2934          | 0.0001                 | 0.0019                 |
| <b>PCOD8323834</b>        | 10.91                       | 27.63                                 | 2.17                           | 1.6103                          | 0.0122               | 2.6294                          | 0.0330               | 3.0358                          | 0.0825               | 0.0552          | 0.1669          | 0.2834          | 0.0000                 | 0.0023                 |
| <b>PCOD8308288</b>        | 10.92                       | 24.83                                 | 0.27                           | 1.6087                          | 0.0092               | 2.6269                          | 0.0251               | 3.0436                          | 0.0695               | 0.0334          | 0.1031          | 0.2313          | 0.0001                 | 0.0023                 |
| <b>PCOD8307691</b>        | 10.93                       | 22.95                                 | 1.01                           | 1.6079                          | 0.0079               | 2.6255                          | 0.0232               | 3.0479                          | 0.0659               | 0.0288          | 0.0933          | 0.2130          | 0.0002                 | 0.0022                 |

| Structure code            | FD<br>(T nm <sup>-3</sup> ) | $\Delta E$<br>(kJ mol <sup>-1</sup> ) | $\nu$<br>(T nm <sup>-3</sup> ) | $\langle D_{TO} \rangle$<br>(Å) | $\sigma_{TO}$<br>(Å) | $\langle D_{OO} \rangle$<br>(Å) | $\sigma_{OO}$<br>(Å) | $\langle D_{TT} \rangle$<br>(Å) | $\sigma_{TT}$<br>(Å) | $R_{TO}$<br>(Å) | $R_{OO}$<br>(Å) | $R_{TT}$<br>(Å) | $\epsilon_{OO}$<br>(Å) | $\epsilon_{TT}$<br>(Å) |
|---------------------------|-----------------------------|---------------------------------------|--------------------------------|---------------------------------|----------------------|---------------------------------|----------------------|---------------------------------|----------------------|-----------------|-----------------|-----------------|------------------------|------------------------|
| <b>PCOD8318323</b>        | 10.93                       | 29.37                                 | 3.38                           | 1.6100                          | 0.0125               | 2.6283                          | 0.0445               | 3.0372                          | 0.0753               | 0.0429          | 0.1890          | 0.2785          | 0.0005                 | 0.0019                 |
| <b>PCOD8325055</b>        | 10.94                       | 25.84                                 | 0.98                           | 1.6071                          | 0.0120               | 2.6242                          | 0.0280               | 3.0513                          | 0.0843               | 0.0372          | 0.0970          | 0.2345          | 0.0001                 | 0.0019                 |
| <b>PCOD8329781</b>        | 10.95                       | 25.89                                 | 1.02                           | 1.6096                          | 0.0109               | 2.6282                          | 0.0286               | 3.0404                          | 0.0813               | 0.0330          | 0.0891          | 0.2311          | 0.0001                 | 0.0031                 |
| <b>PCOD8307129</b>        | 10.95                       | 24.19                                 | 0.14                           | 1.6079                          | 0.0095               | 2.6254                          | 0.0280               | 3.0480                          | 0.0727               | 0.0344          | 0.1246          | 0.2308          | 0.0001                 | 0.0023                 |
| <b><u>PCOD8316367</u></b> | 10.96                       | 28.86                                 | 3.06                           | 1.6097                          | 0.0175               | 2.6272                          | <u>0.0670</u>        | 3.0388                          | 0.0806               | <u>0.0699</u>   | <u>0.2984</u>   | 0.2876          | 0.0010                 | 0.0020                 |
| <b>PCOD8322022</b>        | 10.97                       | 28.89                                 | 3.09                           | 1.6095                          | 0.0119               | 2.6280                          | 0.0313               | 3.0405                          | 0.0880               | 0.0401          | 0.1370          | 0.2690          | 0.0000                 | 0.0029                 |
| <b>PCOD8200818</b>        | 10.97                       | 23.31                                 | 0.73                           | 1.6070                          | 0.0085               | 2.6241                          | 0.0224               | 3.0527                          | 0.0714               | 0.0334          | 0.0975          | 0.2390          | 0.0002                 | 0.0027                 |
| <b>PCOD8323191</b>        | 10.97                       | 21.31                                 | 2.09                           | 1.6098                          | 0.0124               | 2.6280                          | 0.0449               | 3.0363                          | 0.0652               | 0.0468          | 0.2413          | 0.2219          | 0.0005                 | 0.0003                 |
| <b>PCOD8301757</b>        | 10.97                       | 26.54                                 | 1.48                           | 1.6090                          | 0.0103               | 2.6272                          | 0.0285               | 3.0433                          | 0.0784               | 0.0342          | 0.1105          | 0.2284          | 0.0001                 | 0.0030                 |
| <b>PCOD8320103</b>        | 10.97                       | 22.20                                 | 1.48                           | 1.6070                          | 0.0083               | 2.6240                          | 0.0257               | 3.0522                          | 0.0684               | 0.0284          | 0.1159          | 0.2163          | 0.0001                 | 0.0021                 |
| <b>PCOD8309325</b>        | 10.97                       | 24.05                                 | 0.21                           | 1.6070                          | 0.0088               | 2.6241                          | 0.0198               | 3.0522                          | 0.0749               | 0.0274          | 0.0889          | 0.2093          | 0.0002                 | 0.0025                 |
| <b>PCOD8261275</b>        | 10.99                       | 27.06                                 | 1.86                           | 1.6086                          | 0.0102               | 2.6265                          | 0.0320               | 3.0455                          | 0.0852               | 0.0381          | 0.1426          | 0.2562          | 0.0000                 | 0.0036                 |
| <b>PCOD8326900</b>        | 11.00                       | 29.19                                 | 3.33                           | 1.6028                          | 0.0077               | 2.6173                          | 0.0163               | 3.0734                          | 0.0697               | 0.0245          | 0.0894          | 0.1774          | 0.0002                 | 0.0031                 |
| <b>PCOD8196364</b>        | 11.01                       | 26.74                                 | 1.67                           | 1.6077                          | 0.0119               | 2.6251                          | 0.0286               | 3.0495                          | 0.0827               | 0.0392          | 0.1372          | 0.2559          | 0.0001                 | 0.0028                 |
| <b><u>PCOD8193831</u></b> | 11.01                       | 28.91                                 | 3.15                           | 1.6083                          | 0.0147               | 2.6257                          | 0.0417               | 3.0462                          | <u>0.0936</u>        | 0.0615          | 0.2732          | <u>0.3579</u>   | 0.0002                 | 0.0025                 |
| <b><u>PCOD8196409</u></b> | 11.04                       | 28.78                                 | 3.09                           | 1.6082                          | 0.0141               | 2.6258                          | 0.0386               | 3.0464                          | <u>0.0954</u>        | 0.0590          | 0.2809          | <u>0.3635</u>   | 0.0001                 | 0.0025                 |
| <b><u>PCOD8307109</u></b> | 11.05                       | 25.47                                 | 0.84                           | 1.6072                          | 0.0126               | 2.6231                          | 0.0545               | 3.0517                          | 0.0832               | 0.0636          | <u>0.3412</u>   | 0.3250          | 0.0011                 | 0.0026                 |
| <b>PCOD8196416</b>        | 11.05                       | 25.55                                 | 0.90                           | 1.6068                          | 0.0107               | 2.6236                          | 0.0293               | 3.0542                          | 0.0816               | 0.0426          | 0.1601          | 0.2729          | 0.0001                 | 0.0032                 |
| <b>PCOD8329412</b>        | 11.07                       | 19.96                                 | 2.91                           | 1.6075                          | 0.0119               | 2.6248                          | 0.0306               | 3.0471                          | 0.0555               | 0.0453          | 0.1031          | 0.2164          | 0.0000                 | 0.0002                 |
| <b>PCOD8312657</b>        | 11.07                       | 28.66                                 | 3.04                           | 1.6101                          | 0.0122               | 2.6290                          | 0.0366               | 3.0375                          | 0.0852               | 0.0511          | 0.1453          | 0.2899          | 0.0000                 | 0.0028                 |
| <b>PCOD8316869</b>        | 11.07                       | 26.72                                 | 1.71                           | 1.6090                          | 0.0108               | 2.6273                          | 0.0296               | 3.0428                          | 0.0736               | 0.0345          | 0.1206          | 0.2297          | 0.0001                 | 0.0027                 |
| <b>PCOD8196412</b>        | 11.08                       | 24.23                                 | 0.02                           | 1.6066                          | 0.0101               | 2.6234                          | 0.0209               | 3.0548                          | 0.0784               | 0.0346          | 0.1039          | 0.2322          | 0.0002                 | 0.0028                 |
| <b>PCOD8200870</b>        | 11.09                       | 26.15                                 | 1.34                           | 1.6080                          | 0.0102               | 2.6256                          | 0.0291               | 3.0481                          | 0.0839               | 0.0403          | 0.1497          | 0.2713          | 0.0001                 | 0.0032                 |
| <b>PCOD8200919</b>        | 11.10                       | 25.35                                 | 0.81                           | 1.6080                          | 0.0104               | 2.6256                          | 0.0277               | 3.0479                          | 0.0745               | 0.0373          | 0.1440          | 0.2398          | 0.0002                 | 0.0026                 |
| <b>PCOD8200940</b>        | 11.10                       | 25.01                                 | 0.58                           | 1.6079                          | 0.0097               | 2.6256                          | 0.0218               | 3.0481                          | 0.0804               | 0.0323          | 0.0996          | 0.2388          | 0.0002                 | 0.0028                 |
| <b>PCOD8323349</b>        | 11.14                       | 24.53                                 | 0.28                           | 1.6070                          | 0.0100               | 2.6240                          | 0.0290               | 3.0531                          | 0.0679               | 0.0325          | 0.0961          | 0.2080          | 0.0001                 | 0.0031                 |
| <b>PCOD8320017</b>        | 11.15                       | 22.51                                 | 1.09                           | 1.6069                          | 0.0082               | 2.6238                          | 0.0227               | 3.0532                          | 0.0676               | 0.0293          | 0.0942          | 0.1951          | 0.0002                 | 0.0026                 |
| <b>PCOD8196419</b>        | 11.15                       | 23.50                                 | 0.42                           | 1.6056                          | 0.0099               | 2.6217                          | 0.0277               | 3.0599                          | 0.0763               | 0.0382          | 0.1256          | 0.2570          | 0.0000                 | 0.0032                 |
| <b>PCOD8328225</b>        | 11.15                       | 23.45                                 | 0.44                           | 1.6050                          | 0.0112               | 2.6208                          | 0.0327               | 3.0624                          | 0.0796               | 0.0410          | 0.1315          | 0.2045          | 0.0001                 | 0.0029                 |
| <b><u>PCOD8329775</u></b> | 11.16                       | 24.85                                 | 0.52                           | 1.6063                          | 0.0136               | 2.6213                          | <u>0.0603</u>        | 3.0572                          | 0.0735               | 0.0592          | 0.2449          | <u>0.3429</u>   | <u>0.0014</u>          | 0.0037                 |
| <b><u>PCOD8196708</u></b> | 11.17                       | 27.57                                 | 2.39                           | 1.6072                          | 0.0138               | 2.6241                          | 0.0395               | 3.0515                          | <u>0.0943</u>        | 0.0583          | 0.2817          | <u>0.3723</u>   | 0.0001                 | 0.0025                 |

| Structure code     | FD<br>(T nm <sup>-3</sup> ) | $\Delta E$<br>(kJ mol <sup>-1</sup> ) | $\nu$<br>(T nm <sup>-3</sup> ) | $\langle D_{TO} \rangle$<br>(Å) | $\sigma_{TO}$<br>(Å) | $\langle D_{OO} \rangle$<br>(Å) | $\sigma_{OO}$<br>(Å) | $\langle D_{TT} \rangle$<br>(Å) | $\sigma_{TT}$<br>(Å) | $R_{TO}$<br>(Å) | $R_{OO}$<br>(Å) | $R_{TT}$<br>(Å) | $\epsilon_{OO}$<br>(Å) | $\epsilon_{TT}$<br>(Å) |
|--------------------|-----------------------------|---------------------------------------|--------------------------------|---------------------------------|----------------------|---------------------------------|----------------------|---------------------------------|----------------------|-----------------|-----------------|-----------------|------------------------|------------------------|
| PCOD8315762        | 11.18                       | 24.40                                 | 0.23                           | 1.6064                          | 0.0114               | 2.6230                          | 0.0322               | 3.0552                          | 0.0716               | 0.0372          | 0.1367          | 0.2037          | 0.0001                 | 0.0024                 |
| PCOD8316868        | 11.18                       | 26.43                                 | 1.62                           | 1.6093                          | 0.0096               | 2.6279                          | 0.0183               | 3.0415                          | 0.0860               | 0.0284          | 0.0700          | 0.2341          | 0.0002                 | 0.0029                 |
| PCOD8196446        | 11.20                       | 25.57                                 | 1.05                           | 1.6067                          | 0.0116               | 2.6235                          | 0.0323               | 3.0541                          | 0.0824               | 0.0433          | 0.1664          | 0.2785          | 0.0000                 | 0.0027                 |
| PCOD8315708        | 11.20                       | 27.91                                 | 2.65                           | 1.6082                          | 0.0135               | 2.6256                          | 0.0407               | 3.0463                          | 0.0818               | 0.0498          | 0.2165          | 0.2965          | 0.0003                 | 0.0024                 |
| <u>PCOD8324447</u> | 11.25                       | 28.74                                 | 3.27                           | 1.6143                          | 0.0101               | 2.6354                          | 0.0539               | 3.0177                          | <u>0.1100</u>        | 0.0373          | 0.2138          | <u>0.3492</u>   | 0.0005                 | 0.0037                 |
| PCOD8327278        | 11.28                       | 25.21                                 | 0.89                           | 1.6085                          | 0.0097               | 2.6265                          | 0.0246               | 3.0454                          | 0.0816               | 0.0317          | 0.0901          | 0.2467          | 0.0002                 | 0.0027                 |
| PCOD8196712        | 11.29                       | 22.57                                 | 0.91                           | 1.6056                          | 0.0092               | 2.6218                          | 0.0209               | 3.0593                          | 0.0766               | 0.0342          | 0.1202          | 0.2446          | 0.0002                 | 0.0026                 |
| PCOD8200941        | 11.30                       | 22.04                                 | 1.26                           | 1.6060                          | 0.0080               | 2.6224                          | 0.0239               | 3.0575                          | 0.0685               | 0.0342          | 0.1154          | 0.2455          | 0.0002                 | 0.0028                 |
| PCOD8326718        | 11.30                       | 23.07                                 | 0.56                           | 1.6059                          | 0.0091               | 2.6223                          | 0.0221               | 3.0579                          | 0.0722               | 0.0299          | 0.0810          | 0.2087          | 0.0001                 | 0.0026                 |
| PCOD8292641        | 11.30                       | 24.96                                 | 0.74                           | 1.6084                          | 0.0090               | 2.6263                          | 0.0278               | 3.0458                          | 0.0760               | 0.0343          | 0.1123          | 0.2378          | 0.0000                 | 0.0030                 |
| PCOD8196417        | 11.37                       | 24.45                                 | 0.45                           | 1.6058                          | 0.0104               | 2.6220                          | 0.0307               | 3.0590                          | 0.0793               | 0.0456          | 0.1687          | 0.2782          | 0.0000                 | 0.0032                 |
| PCOD8307383        | 11.38                       | 24.02                                 | 0.17                           | 1.6058                          | 0.0117               | 2.6222                          | 0.0189               | 3.0583                          | 0.0797               | 0.0436          | 0.0737          | 0.2192          | 0.0002                 | 0.0028                 |
| PCOD8298138        | 11.38                       | 25.42                                 | 1.14                           | 1.6066                          | 0.0121               | 2.6234                          | 0.0299               | 3.0540                          | 0.0829               | 0.0422          | 0.1110          | 0.2411          | 0.0001                 | 0.0022                 |
| PCOD8265553        | 11.39                       | 23.47                                 | 0.19                           | 1.6053                          | 0.0115               | 2.6211                          | 0.0326               | 3.0608                          | 0.0802               | 0.0575          | 0.2395          | 0.2955          | 0.0001                 | 0.0028                 |
| PCOD8255421        | 11.39                       | 24.84                                 | 0.75                           | 1.6078                          | 0.0112               | 2.6252                          | 0.0324               | 3.0486                          | 0.0784               | 0.0376          | 0.1267          | 0.2473          | 0.0000                 | 0.0027                 |
| PCOD8310673        | 11.39                       | 25.63                                 | 1.29                           | 1.6080                          | 0.0112               | 2.6254                          | 0.0318               | 3.0483                          | 0.0805               | 0.0406          | 0.1125          | 0.2183          | 0.0001                 | 0.0032                 |
| <u>PCOD8307474</u> | 11.40                       | 22.68                                 | 0.73                           | 1.6058                          | 0.0147               | 2.6212                          | 0.0529               | 3.0573                          | 0.0580               | <u>0.0652</u>   | 0.2110          | 0.2342          | 0.0007                 | 0.0015                 |
| <u>PCOD8255713</u> | 11.40                       | 27.84                                 | 2.81                           | 1.6073                          | 0.0171               | 2.6241                          | 0.0454               | 3.0508                          | <u>0.0956</u>        | <u>0.0785</u>   | <u>0.3404</u>   | 0.3178          | 0.0002                 | 0.0023                 |
| PCOD8312377        | 11.41                       | 23.55                                 | 0.12                           | 1.6073                          | 0.0091               | 2.6245                          | 0.0253               | 3.0506                          | 0.0717               | 0.0350          | 0.1241          | 0.2395          | 0.0001                 | 0.0023                 |
| PCOD8265558        | 11.41                       | 26.14                                 | 1.65                           | 1.6072                          | 0.0124               | 2.6243                          | 0.0282               | 3.0513                          | 0.0841               | 0.0407          | 0.1020          | 0.2396          | 0.0001                 | 0.0021                 |
| <u>PCOD8317669</u> | 11.41                       | 26.96                                 | 2.22                           | 1.6093                          | 0.0128               | 2.6276                          | 0.0364               | 3.0428                          | <u>0.0971</u>        | 0.0582          | 0.1587          | 0.3333          | 0.0000                 | 0.0040                 |
| PCOD8329746        | 11.42                       | 26.37                                 | 1.83                           | 1.6081                          | 0.0115               | 2.6251                          | 0.0457               | 3.0476                          | 0.0762               | 0.0391          | 0.1870          | 0.2597          | 0.0005                 | 0.0029                 |
| <u>PCOD8288252</u> | 11.43                       | 27.75                                 | 2.77                           | 1.6073                          | 0.0158               | 2.6242                          | 0.0428               | 3.0519                          | <u>0.1037</u>        | 0.0578          | 0.2125          | 0.3183          | 0.0001                 | 0.0033                 |
| PCOD8292631        | 11.43                       | 27.27                                 | 2.44                           | 1.6100                          | 0.0101               | 2.6289                          | 0.0257               | 3.0384                          | 0.0826               | 0.0339          | 0.0929          | 0.2311          | 0.0002                 | 0.0030                 |
| <u>PCOD8287200</u> | 11.43                       | 25.09                                 | 0.96                           | 1.6056                          | 0.0147               | 2.6217                          | 0.0347               | 3.0594                          | <u>0.0922</u>        | 0.0595          | 0.1543          | 0.2848          | 0.0000                 | 0.0028                 |
| PCOD8316033        | 11.46                       | 26.21                                 | 1.75                           | 1.6093                          | 0.0141               | 2.6273                          | 0.0443               | 3.0392                          | 0.0779               | 0.0450          | 0.1842          | 0.2452          | 0.0003                 | 0.0003                 |
| <u>PCOD8313111</u> | 11.49                       | 26.01                                 | 1.65                           | 1.6067                          | 0.0147               | 2.6231                          | 0.0454               | 3.0547                          | <u>0.0934</u>        | 0.0682          | 0.2658          | <u>0.3679</u>   | 0.0003                 | 0.0035                 |
| <u>PCOD8196694</u> | 11.50                       | 29.47                                 | 4.02                           | 1.6082                          | 0.0156               | 2.6256                          | 0.0442               | 3.0461                          | <u>0.0995</u>        | 0.0707          | 0.2927          | <u>0.3686</u>   | 0.0002                 | 0.0020                 |
| <u>PCOD8307137</u> | 11.51                       | 26.21                                 | 1.80                           | 1.6099                          | 0.0104               | 2.6281                          | 0.0322               | 3.0386                          | <u>0.1015</u>        | 0.0480          | 0.1346          | <u>0.4175</u>   | 0.0005                 | 0.0030                 |
| PCOD8321916        | 11.51                       | 23.38                                 | 0.13                           | 1.6078                          | 0.0079               | 2.6253                          | 0.0280               | 3.0487                          | 0.0655               | 0.0287          | 0.1185          | 0.2187          | 0.0001                 | 0.0027                 |
| PCOD8196447        | 11.52                       | 24.15                                 | 0.40                           | 1.6067                          | 0.0104               | 2.6236                          | 0.0223               | 3.0536                          | 0.0796               | 0.0364          | 0.1109          | 0.2401          | 0.0002                 | 0.0024                 |

| Structure code            | FD<br>(T nm <sup>-3</sup> ) | $\Delta E$<br>(kJ mol <sup>-1</sup> ) | $\nu$<br>(T nm <sup>-3</sup> ) | $\langle D_{TO} \rangle$<br>(Å) | $\sigma_{TO}$<br>(Å) | $\langle D_{OO} \rangle$<br>(Å) | $\sigma_{OO}$<br>(Å) | $\langle D_{TT} \rangle$<br>(Å) | $\sigma_{TT}$<br>(Å) | $R_{TO}$<br>(Å) | $R_{OO}$<br>(Å) | $R_{TT}$<br>(Å) | $\epsilon_{OO}$<br>(Å) | $\epsilon_{TT}$<br>(Å) |
|---------------------------|-----------------------------|---------------------------------------|--------------------------------|---------------------------------|----------------------|---------------------------------|----------------------|---------------------------------|----------------------|-----------------|-----------------|-----------------|------------------------|------------------------|
| <b>PCOD8316532</b>        | 11.52                       | 22.77                                 | 0.54                           | 1.6064                          | 0.0088               | 2.6227                          | 0.0344               | 3.0553                          | 0.0777               | 0.0329          | 0.1788          | 0.2587          | 0.0003                 | 0.0027                 |
| <b><u>PCOD8297460</u></b> | 11.53                       | 22.35                                 | 0.82                           | 1.6038                          | 0.0127               | 2.6186                          | 0.0366               | 3.0680                          | 0.0781               | <u>0.0767</u>   | <u>0.3208</u>   | 0.3116          | 0.0001                 | 0.0024                 |
| <b>PCOD8316376</b>        | 11.55                       | 26.24                                 | 1.86                           | 1.6094                          | 0.0123               | 2.6279                          | 0.0355               | 3.0389                          | 0.0806               | 0.0416          | 0.1397          | 0.2491          | 0.0000                 | 0.0010                 |
| <b>PCOD8326816</b>        | 11.57                       | 27.70                                 | 2.89                           | 1.6070                          | 0.0139               | 2.6230                          | 0.0508               | 3.0537                          | 0.0787               | 0.0469          | 0.1505          | 0.2612          | 0.0008                 | 0.0036                 |
| <b>PCOD8307682</b>        | 11.57                       | 25.03                                 | 1.05                           | 1.6088                          | 0.0089               | 2.6270                          | 0.0248               | 3.0437                          | 0.0769               | 0.0300          | 0.0894          | 0.2438          | 0.0002                 | 0.0026                 |
| <b>PCOD8303097</b>        | 11.58                       | 22.01                                 | 1.00                           | 1.6057                          | 0.0094               | 2.6219                          | 0.0250               | 3.0595                          | 0.0781               | 0.0403          | 0.1184          | 0.2514          | 0.0001                 | 0.0031                 |
| <b>PCOD8316035</b>        | 11.58                       | 25.97                                 | 1.71                           | 1.6078                          | 0.0115               | 2.6254                          | 0.0257               | 3.0482                          | 0.0821               | 0.0354          | 0.1077          | 0.2396          | 0.0001                 | 0.0024                 |
| <b>PCOD8313398</b>        | 11.60                       | 25.84                                 | 1.63                           | 1.6090                          | 0.0111               | 2.6273                          | 0.0363               | 3.0423                          | 0.0634               | 0.0397          | 0.1429          | 0.2164          | 0.0001                 | 0.0023                 |
| <b><u>PCOD8319437</u></b> | 11.61                       | 25.31                                 | 1.29                           | 1.6081                          | 0.0143               | 2.6255                          | 0.0395               | 3.0457                          | 0.0659               | <u>0.0652</u>   | 0.2037          | 0.2932          | 0.0002                 | 0.0012                 |
| <b>PCOD8196713</b>        | 11.61                       | 20.87                                 | 1.75                           | 1.6044                          | 0.0083               | 2.6199                          | 0.0201               | 3.0651                          | 0.0718               | 0.0341          | 0.1236          | 0.2459          | 0.0002                 | 0.0026                 |
| <b>PCOD8329305</b>        | 11.62                       | 24.06                                 | 0.44                           | 1.6069                          | 0.0111               | 2.6237                          | 0.0331               | 3.0534                          | 0.0659               | 0.0447          | 0.1266          | 0.2045          | 0.0000                 | 0.0028                 |
| <b><u>PCOD8317985</u></b> | 11.62                       | 27.41                                 | 2.74                           | 1.6091                          | 0.0134               | 2.6271                          | 0.0425               | 3.0431                          | <u>0.0922</u>        | 0.0499          | 0.1881          | 0.2928          | 0.0002                 | 0.0033                 |
| <b>PCOD8196411</b>        | 11.66                       | 24.69                                 | 0.91                           | 1.6067                          | 0.0104               | 2.6236                          | 0.0242               | 3.0541                          | 0.0792               | 0.0340          | 0.1092          | 0.2409          | 0.0001                 | 0.0029                 |
| <b>PCOD8316043</b>        | 11.66                       | 26.78                                 | 2.34                           | 1.6071                          | 0.0139               | 2.6235                          | 0.0505               | 3.0535                          | 0.0852               | 0.0498          | 0.2520          | 0.2636          | 0.0005                 | 0.0040                 |
| <b>PCOD8312321</b>        | 11.66                       | 23.18                                 | 0.12                           | 1.6062                          | 0.0094               | 2.6227                          | 0.0238               | 3.0561                          | 0.0704               | 0.0365          | 0.1024          | 0.2108          | 0.0001                 | 0.0023                 |
| <b><u>PCOD8304708</u></b> | 11.67                       | 27.38                                 | 2.77                           | 1.6070                          | 0.0154               | 2.6226                          | <u>0.0698</u>        | 3.0517                          | 0.0582               | 0.0589          | 0.2595          | 0.2220          | <u>0.0012</u>          | 0.0017                 |
| <b>PCOD8193833</b>        | 11.67                       | 22.22                                 | 0.76                           | 1.6055                          | 0.0101               | 2.6215                          | 0.0248               | 3.0599                          | 0.0715               | 0.0399          | 0.0980          | 0.2495          | 0.0001                 | 0.0025                 |
| <b>PCOD8292632</b>        | 11.69                       | 26.23                                 | 1.99                           | 1.6080                          | 0.0103               | 2.6257                          | 0.0262               | 3.0483                          | 0.0756               | 0.0331          | 0.1001          | 0.2100          | 0.0001                 | 0.0032                 |
| <b>PCOD8316036</b>        | 11.70                       | 23.00                                 | 0.21                           | 1.6059                          | 0.0098               | 2.6223                          | 0.0254               | 3.0574                          | 0.0706               | 0.0369          | 0.1124          | 0.2113          | 0.0001                 | 0.0023                 |
| <b>PCOD8328510</b>        | 11.70                       | 19.74                                 | 2.43                           | 1.6072                          | 0.0106               | 2.6244                          | 0.0295               | 3.0494                          | 0.0531               | 0.0449          | 0.1061          | 0.1844          | 0.0001                 | 0.0004                 |
| <b>PCOD8312314</b>        | 11.70                       | 25.92                                 | 1.80                           | 1.6115                          | 0.0118               | 2.6314                          | 0.0311               | 3.0283                          | 0.0595               | 0.0477          | 0.1396          | 0.2253          | 0.0001                 | 0.0006                 |
| <b>PCOD8305122</b>        | 11.73                       | 21.07                                 | 1.49                           | 1.6049                          | 0.0085               | 2.6207                          | 0.0211               | 3.0624                          | 0.0753               | 0.0316          | 0.1041          | 0.2082          | 0.0002                 | 0.0022                 |
| <b><u>PCOD8322944</u></b> | 11.77                       | 25.61                                 | 1.66                           | 1.6037                          | 0.0155               | 2.6169                          | <u>0.0668</u>        | 3.0714                          | 0.0686               | <u>0.0693</u>   | 0.2283          | 0.2984          | <u>0.0016</u>          | <u>0.0051</u>          |
| <b>PCOD8318338</b>        | 11.78                       | 27.80                                 | 3.17                           | 1.6095                          | 0.0121               | 2.6276                          | 0.0345               | 3.0403                          | 0.0794               | 0.0485          | 0.1647          | 0.2736          | 0.0003                 | 0.0026                 |
| <b>PCOD8328255</b>        | 11.79                       | 25.41                                 | 1.53                           | 1.6067                          | 0.0122               | 2.6235                          | 0.0359               | 3.0542                          | 0.0743               | 0.0490          | 0.1624          | 0.2312          | 0.0000                 | 0.0031                 |
| <b><u>PCOD8307972</u></b> | 11.80                       | 24.87                                 | 1.17                           | 1.6092                          | 0.0130               | 2.6273                          | 0.0429               | 3.0407                          | 0.0671               | 0.0585          | <u>0.2757</u>   | 0.2400          | 0.0002                 | 0.0016                 |
| <b>PCOD8313826</b>        | 11.82                       | 25.92                                 | 1.91                           | 1.6073                          | 0.0120               | 2.6242                          | 0.0334               | 3.0513                          | 0.0802               | 0.0438          | 0.1320          | 0.2596          | 0.0001                 | 0.0027                 |
| <b>PCOD8307105</b>        | 11.82                       | 23.79                                 | 0.46                           | 1.6047                          | 0.0136               | 2.6198                          | 0.0417               | 3.0627                          | 0.0821               | 0.0514          | 0.1885          | 0.2872          | 0.0003                 | 0.0015                 |
| <b>PCOD8328256</b>        | 11.82                       | 27.41                                 | 2.93                           | 1.6072                          | 0.0134               | 2.6241                          | 0.0355               | 3.0523                          | 0.0829               | 0.0449          | 0.1498          | 0.2244          | 0.0000                 | 0.0032                 |
| <b>PCOD8297639</b>        | 11.84                       | 19.63                                 | 2.37                           | 1.6031                          | 0.0101               | 2.6175                          | 0.0299               | 3.0714                          | 0.0773               | 0.0506          | 0.1819          | 0.2560          | 0.0001                 | 0.0027                 |

| Structure code     | FD<br>(T nm <sup>-3</sup> ) | $\Delta E$<br>(kJ mol <sup>-1</sup> ) | $\nu$<br>(T nm <sup>-3</sup> ) | $\langle D_{TO} \rangle$<br>(Å) | $\sigma_{TO}$<br>(Å) | $\langle D_{OO} \rangle$<br>(Å) | $\sigma_{OO}$<br>(Å) | $\langle D_{TT} \rangle$<br>(Å) | $\sigma_{TT}$<br>(Å) | $R_{TO}$<br>(Å) | $R_{OO}$<br>(Å) | $R_{TT}$<br>(Å) | $\epsilon_{OO}$<br>(Å) | $\epsilon_{TT}$<br>(Å) |
|--------------------|-----------------------------|---------------------------------------|--------------------------------|---------------------------------|----------------------|---------------------------------|----------------------|---------------------------------|----------------------|-----------------|-----------------|-----------------|------------------------|------------------------|
| PCOD8325006        | 11.86                       | 24.94                                 | 1.29                           | 1.6087                          | 0.0105               | 2.6264                          | 0.0453               | 3.0435                          | 0.0855               | 0.0433          | 0.1508          | 0.2373          | 0.0004                 | 0.0021                 |
| <u>PCOD8116632</u> | 11.87                       | 24.69                                 | 1.13                           | 1.6065                          | 0.0097               | 2.6230                          | 0.0375               | 3.0568                          | <u>0.0921</u>        | 0.0475          | 0.2062          | <u>0.3991</u>   | 0.0001                 | 0.0046                 |
| PCOD8306633        | 11.88                       | 19.96                                 | 2.11                           | 1.6038                          | 0.0068               | 2.6188                          | 0.0213               | 3.0682                          | 0.0654               | 0.0284          | 0.0964          | 0.1902          | 0.0001                 | 0.0028                 |
| PCOD8316365        | 11.88                       | 26.91                                 | 2.65                           | 1.6091                          | 0.0092               | 2.6276                          | 0.0212               | 3.0423                          | 0.0813               | 0.0306          | 0.0735          | 0.2293          | 0.0002                 | 0.0028                 |
| PCOD8288096        | 11.88                       | 23.86                                 | 0.57                           | 1.6065                          | 0.0122               | 2.6232                          | 0.0301               | 3.0547                          | 0.0879               | 0.0405          | 0.1146          | 0.2618          | 0.0001                 | 0.0023                 |
| PCOD8194776        | 11.89                       | 21.55                                 | 1.00                           | 1.6043                          | 0.0107               | 2.6195                          | 0.0278               | 3.0656                          | 0.0751               | 0.0437          | 0.1055          | 0.2476          | 0.0001                 | 0.0025                 |
| PCOD8317687        | 11.90                       | 26.03                                 | 2.07                           | 1.6074                          | 0.0112               | 2.6245                          | 0.0310               | 3.0510                          | 0.0770               | 0.0391          | 0.1106          | 0.2517          | 0.0000                 | 0.0029                 |
| PCOD8324911        | 11.90                       | 21.95                                 | 0.72                           | 1.6050                          | 0.0093               | 2.6206                          | 0.0336               | 3.0629                          | 0.0809               | 0.0405          | 0.1498          | 0.2625          | 0.0001                 | 0.0032                 |
| PCOD8196714        | 11.90                       | 22.72                                 | 0.19                           | 1.6057                          | 0.0095               | 2.6220                          | 0.0220               | 3.0586                          | 0.0772               | 0.0340          | 0.1175          | 0.2449          | 0.0002                 | 0.0023                 |
| PCOD8196690        | 11.91                       | 22.76                                 | 0.16                           | 1.6049                          | 0.0104               | 2.6204                          | 0.0292               | 3.0631                          | 0.0818               | 0.0399          | 0.1296          | 0.2422          | 0.0000                 | 0.0029                 |
| PCOD8275019        | 11.92                       | 23.76                                 | 0.53                           | 1.6062                          | 0.0102               | 2.6227                          | 0.0321               | 3.0568                          | 0.0662               | 0.0364          | 0.1110          | 0.2265          | 0.0001                 | 0.0030                 |
| PCOD8301771        | 11.93                       | 23.78                                 | 0.56                           | 1.6073                          | 0.0085               | 2.6243                          | 0.0322               | 3.0511                          | 0.0675               | 0.0332          | 0.1209          | 0.2120          | 0.0000                 | 0.0025                 |
| PCOD8194775        | 11.95                       | 22.13                                 | 0.55                           | 1.6045                          | 0.0115               | 2.6198                          | 0.0255               | 3.0645                          | 0.0796               | 0.0431          | 0.1179          | 0.2586          | 0.0000                 | 0.0022                 |
| PCOD8201049        | 11.96                       | 24.26                                 | 0.92                           | 1.6058                          | 0.0118               | 2.6221                          | 0.0224               | 3.0587                          | 0.0804               | 0.0451          | 0.0871          | 0.2292          | 0.0002                 | 0.0029                 |
| PCOD8287212        | 11.96                       | 22.90                                 | 0.01                           | 1.6069                          | 0.0130               | 2.6238                          | 0.0326               | 3.0524                          | 0.0796               | 0.0512          | 0.1570          | 0.2768          | 0.0000                 | 0.0019                 |
| PCOD8330297        | 11.97                       | 21.42                                 | 1.01                           | 1.6053                          | 0.0095               | 2.6213                          | 0.0281               | 3.0602                          | 0.0632               | 0.0408          | 0.1119          | 0.2082          | 0.0001                 | 0.0022                 |
| PCOD8287211        | 11.98                       | 22.07                                 | 0.57                           | 1.6062                          | 0.0125               | 2.6226                          | 0.0324               | 3.0553                          | 0.0809               | 0.0493          | 0.1417          | 0.2782          | 0.0000                 | 0.0014                 |
| PCOD8297228        | 11.98                       | 24.17                                 | 0.88                           | 1.6084                          | 0.0124               | 2.6262                          | 0.0350               | 3.0431                          | 0.0726               | 0.0469          | 0.1330          | 0.2730          | 0.0000                 | 0.0002                 |
| PCOD8200993        | 11.99                       | 23.49                                 | 0.42                           | 1.6070                          | 0.0088               | 2.6241                          | 0.0205               | 3.0526                          | 0.0778               | 0.0331          | 0.0900          | 0.2424          | 0.0002                 | 0.0028                 |
| <u>PCOD8315647</u> | 11.99                       | 24.64                                 | 1.20                           | 1.6070                          | 0.0164               | 2.6232                          | 0.0552               | 3.0506                          | 0.0643               | <u>0.0715</u>   | 0.2214          | 0.2613          | 0.0008                 | 0.0009                 |
| PCOD8297227        | 12.00                       | 24.08                                 | 0.83                           | 1.6096                          | 0.0113               | 2.6282                          | 0.0310               | 3.0376                          | 0.0732               | 0.0437          | 0.1216          | 0.2714          | 0.0000                 | 0.0004                 |
| PCOD8301799        | 12.02                       | 23.60                                 | 0.52                           | 1.6085                          | 0.0106               | 2.6265                          | 0.0276               | 3.0434                          | 0.0765               | 0.0384          | 0.0868          | 0.2297          | 0.0001                 | 0.0008                 |
| PCOD8274967        | 12.04                       | 21.78                                 | 0.70                           | 1.6057                          | 0.0074               | 2.6218                          | 0.0239               | 3.0593                          | 0.0681               | 0.0287          | 0.0997          | 0.2221          | 0.0001                 | 0.0028                 |
| <u>PCOD8322792</u> | 12.06                       | 24.56                                 | 1.22                           | 1.6060                          | 0.0106               | 2.6219                          | 0.0440               | 3.0581                          | <u>0.0927</u>        | 0.0387          | 0.2262          | 0.2930          | 0.0004                 | 0.0034                 |
| PCOD8275427        | 12.06                       | 22.82                                 | 0.03                           | 1.6083                          | 0.0113               | 2.6260                          | 0.0345               | 3.0434                          | 0.0652               | 0.0430          | 0.1438          | 0.2719          | 0.0000                 | 0.0001                 |
| <u>PCOD8307101</u> | 12.07                       | 22.48                                 | 0.19                           | 1.6059                          | 0.0125               | 2.6213                          | 0.0412               | 3.0600                          | <u>0.1028</u>        | 0.0439          | 0.1785          | <u>0.4024</u>   | 0.0008                 | 0.0047                 |
| PCOD8255618        | 12.07                       | 24.56                                 | 1.23                           | 1.6073                          | 0.0130               | 2.6245                          | 0.0348               | 3.0507                          | 0.0848               | 0.0507          | 0.1578          | 0.2759          | 0.0000                 | 0.0025                 |
| PCOD8274173        | 12.08                       | 24.31                                 | 1.07                           | 1.6082                          | 0.0129               | 2.6256                          | 0.0412               | 3.0440                          | 0.0677               | 0.0460          | 0.1839          | 0.2775          | 0.0003                 | 0.0001                 |
| PCOD8288100        | 12.08                       | 22.17                                 | 0.39                           | 1.6062                          | 0.0130               | 2.6226                          | 0.0293               | 3.0556                          | 0.0808               | 0.0522          | 0.1440          | 0.2776          | 0.0000                 | 0.0016                 |
| <u>PCOD8312121</u> | 12.09                       | 23.95                                 | 0.83                           | 1.6081                          | 0.0156               | 2.6251                          | 0.0510               | 3.0453                          | 0.0666               | <u>0.0750</u>   | 0.2421          | 0.2715          | 0.0006                 | 0.0008                 |
| PCOD8275276        | 12.09                       | 22.29                                 | 0.30                           | 1.6081                          | 0.0110               | 2.6256                          | 0.0295               | 3.0449                          | 0.0715               | 0.0396          | 0.1239          | 0.2463          | 0.0000                 | 0.0002                 |

| Structure code     | FD<br>(T nm <sup>-3</sup> ) | $\Delta E$<br>(kJ mol <sup>-1</sup> ) | $\nu$<br>(T nm <sup>-3</sup> ) | $\langle D_{TO} \rangle$<br>(Å) | $\sigma_{TO}$<br>(Å) | $\langle D_{OO} \rangle$<br>(Å) | $\sigma_{OO}$<br>(Å) | $\langle D_{TT} \rangle$<br>(Å) | $\sigma_{TT}$<br>(Å) | $R_{TO}$<br>(Å) | $R_{OO}$<br>(Å) | $R_{TT}$<br>(Å) | $\epsilon_{OO}$<br>(Å) | $\epsilon_{TT}$<br>(Å) |
|--------------------|-----------------------------|---------------------------------------|--------------------------------|---------------------------------|----------------------|---------------------------------|----------------------|---------------------------------|----------------------|-----------------|-----------------|-----------------|------------------------|------------------------|
| <b>PCOD8297400</b> | 12.10                       | 22.55                                 | 0.11                           | 1.6083                          | 0.0125               | 2.6260                          | 0.0355               | 3.0431                          | 0.0652               | 0.0471          | 0.1495          | 0.2678          | 0.0001                 | 0.0002                 |
| <b>PCOD8265260</b> | 12.12                       | 23.02                                 | 0.23                           | 1.6085                          | 0.0110               | 2.6264                          | 0.0299               | 3.0424                          | 0.0728               | 0.0334          | 0.1335          | 0.2486          | 0.0000                 | 0.0001                 |
| <b>PCOD8297423</b> | 12.12                       | 24.04                                 | 0.93                           | 1.6075                          | 0.0136               | 2.6247                          | 0.0357               | 3.0490                          | 0.0688               | 0.0488          | 0.1624          | 0.2272          | 0.0000                 | 0.0014                 |
| <b>PCOD8324833</b> | 12.13                       | 22.82                                 | 0.10                           | 1.6061                          | 0.0097               | 2.6224                          | 0.0331               | 3.0567                          | <u>0.0891</u>        | 0.0342          | 0.1429          | 0.2402          | 0.0000                 | 0.0022                 |
| <b>PCOD8196413</b> | 12.14                       | 23.14                                 | 0.33                           | 1.6058                          | 0.0099               | 2.6221                          | 0.0218               | 3.0584                          | 0.0761               | 0.0358          | 0.1044          | 0.2343          | 0.0002                 | 0.0026                 |
| <b>PCOD8288108</b> | 12.14                       | 22.62                                 | 0.02                           | 1.6059                          | 0.0132               | 2.6221                          | 0.0304               | 3.0571                          | 0.0833               | 0.0523          | 0.1464          | 0.2828          | 0.0000                 | 0.0018                 |
| <b>PCOD8298127</b> | 12.14                       | 21.87                                 | 0.54                           | 1.6085                          | 0.0122               | 2.6262                          | 0.0352               | 3.0420                          | 0.0623               | 0.0446          | 0.1530          | 0.2511          | 0.0001                 | 0.0006                 |
| <b>PCOD8275748</b> | 12.14                       | 21.50                                 | 0.79                           | 1.6067                          | 0.0132               | 2.6234                          | 0.0380               | 3.0509                          | 0.0614               | 0.0506          | 0.1760          | 0.2818          | 0.0001                 | 0.0003                 |
| <b>PCOD8299383</b> | 12.16                       | 22.83                                 | 0.14                           | 1.6061                          | 0.0092               | 2.6224                          | 0.0281               | 3.0571                          | 0.0730               | 0.0350          | 0.1013          | 0.2394          | 0.0000                 | 0.0028                 |
| <b>PCOD8275707</b> | 12.16                       | 21.38                                 | 0.85                           | 1.6067                          | 0.0129               | 2.6233                          | 0.0384               | 3.0509                          | 0.0604               | 0.0483          | 0.1713          | 0.2756          | 0.0001                 | 0.0003                 |
| <b>PCOD8196698</b> | 12.17                       | 22.95                                 | 0.23                           | 1.6054                          | 0.0116               | 2.6214                          | 0.0313               | 3.0596                          | 0.0795               | 0.0535          | 0.1875          | 0.2816          | 0.0000                 | 0.0021                 |
| <b>PCOD8316327</b> | 12.17                       | 23.41                                 | 0.55                           | 1.6058                          | 0.0099               | 2.6222                          | 0.0215               | 3.0579                          | 0.0807               | 0.0319          | 0.1220          | 0.2488          | 0.0002                 | 0.0023                 |
| <b>PCOD8321872</b> | 12.17                       | 23.01                                 | 0.27                           | 1.6049                          | 0.0111               | 2.6206                          | 0.0223               | 3.0631                          | 0.0769               | 0.0333          | 0.0834          | 0.1953          | 0.0002                 | 0.0027                 |
| <b>PCOD8318347</b> | 12.20                       | 23.59                                 | 0.70                           | 1.6079                          | 0.0080               | 2.6253                          | 0.0319               | 3.0483                          | 0.0687               | 0.0308          | 0.1585          | 0.2303          | 0.0001                 | 0.0028                 |
| <b>PCOD8276280</b> | 12.22                       | 21.74                                 | 0.55                           | 1.6059                          | 0.0078               | 2.6222                          | 0.0259               | 3.0578                          | 0.0571               | 0.0321          | 0.1155          | 0.2115          | 0.0001                 | 0.0025                 |
| <b>PCOD8292926</b> | 12.23                       | 24.63                                 | 1.44                           | 1.6069                          | 0.0139               | 2.6238                          | 0.0343               | 3.0529                          | 0.0858               | 0.0519          | 0.1547          | 0.2803          | 0.0000                 | 0.0027                 |
| <b>PCOD8196448</b> | 12.23                       | 24.68                                 | 1.48                           | 1.6070                          | 0.0110               | 2.6240                          | 0.0259               | 3.0525                          | 0.0806               | 0.0364          | 0.1216          | 0.2471          | 0.0001                 | 0.0024                 |
| <b>PCOD8287203</b> | 12.24                       | 25.08                                 | 1.76                           | 1.6073                          | 0.0133               | 2.6245                          | 0.0333               | 3.0508                          | 0.0851               | 0.0556          | 0.1533          | 0.2800          | 0.0000                 | 0.0026                 |
| <b>PCOD8323380</b> | 12.26                       | 23.37                                 | 0.60                           | 1.6077                          | 0.0113               | 2.6252                          | 0.0317               | 3.0477                          | 0.0656               | 0.0493          | 0.1310          | 0.2467          | 0.0001                 | 0.0015                 |
| <b>PCOD8277636</b> | 12.27                       | 25.57                                 | 2.12                           | 1.6063                          | 0.0108               | 2.6224                          | 0.0405               | 3.0575                          | 0.0865               | 0.0382          | 0.1478          | 0.2875          | 0.0004                 | 0.0044                 |
| <b>PCOD8255720</b> | 12.30                       | 25.20                                 | 1.90                           | 1.6060                          | 0.0147               | 2.6222                          | 0.0361               | 3.0577                          | <u>0.0920</u>        | 0.0607          | 0.1639          | 0.2882          | 0.0000                 | 0.0027                 |
| <b>PCOD8193832</b> | 12.32                       | 22.34                                 | 0.03                           | 1.6055                          | 0.0105               | 2.6214                          | 0.0270               | 3.0600                          | 0.0716               | 0.0394          | 0.0980          | 0.2359          | 0.0000                 | 0.0025                 |
| <b>PCOD8287166</b> | 12.33                       | 21.95                                 | 0.30                           | 1.6066                          | 0.0096               | 2.6233                          | 0.0315               | 3.0548                          | 0.0767               | 0.0350          | 0.1063          | 0.2565          | 0.0001                 | 0.0028                 |
| <b>PCOD8308290</b> | 12.33                       | 23.49                                 | 0.76                           | 1.6075                          | 0.0085               | 2.6250                          | 0.0228               | 3.0496                          | 0.0693               | 0.0301          | 0.0863          | 0.2207          | 0.0002                 | 0.0024                 |
| <b>PCOD8287156</b> | 12.35                       | 21.41                                 | 0.65                           | 1.6064                          | 0.0121               | 2.6227                          | 0.0388               | 3.0544                          | 0.0609               | 0.0587          | 0.1589          | 0.1848          | 0.0002                 | 0.0013                 |
| <b>PCOD8298160</b> | 12.36                       | 23.55                                 | 0.84                           | 1.6069                          | 0.0094               | 2.6237                          | 0.0302               | 3.0532                          | 0.0701               | 0.0330          | 0.1254          | 0.2126          | 0.0000                 | 0.0027                 |
| <b>PCOD8297421</b> | 12.38                       | 22.83                                 | 0.35                           | 1.6049                          | 0.0106               | 2.6206                          | 0.0273               | 3.0629                          | 0.0771               | 0.0457          | 0.1061          | 0.2281          | 0.0001                 | 0.0028                 |
| <b>PCOD8255661</b> | 12.38                       | 23.58                                 | 0.87                           | 1.6057                          | 0.0134               | 2.6219                          | 0.0326               | 3.0584                          | 0.0856               | 0.0509          | 0.1301          | 0.2778          | 0.0000                 | 0.0024                 |
| <b>PCOD8322639</b> | 12.38                       | 23.62                                 | 0.90                           | 1.6068                          | 0.0121               | 2.6232                          | 0.0453               | 3.0532                          | 0.0743               | 0.0482          | 0.2370          | 0.2555          | 0.0003                 | 0.0023                 |
| <b>PCOD8200852</b> | 12.39                       | 21.85                                 | 0.30                           | 1.6063                          | 0.0076               | 2.6229                          | 0.0225               | 3.0559                          | 0.0667               | 0.0334          | 0.0881          | 0.2413          | 0.0002                 | 0.0026                 |
| <b>PCOD8316048</b> | 12.39                       | 23.10                                 | 0.56                           | 1.6067                          | 0.0101               | 2.6235                          | 0.0256               | 3.0533                          | 0.0783               | 0.0433          | 0.1176          | 0.2248          | 0.0001                 | 0.0019                 |

| Structure code     | FD<br>(T nm <sup>-3</sup> ) | $\Delta E$<br>(kJ mol <sup>-1</sup> ) | $\nu$<br>(T nm <sup>-3</sup> ) | $\langle D_{TO} \rangle$<br>(Å) | $\sigma_{TO}$<br>(Å) | $\langle D_{OO} \rangle$<br>(Å) | $\sigma_{OO}$<br>(Å) | $\langle D_{TT} \rangle$<br>(Å) | $\sigma_{TT}$<br>(Å) | $R_{TO}$<br>(Å) | $R_{OO}$<br>(Å) | $R_{TT}$<br>(Å) | $\epsilon_{OO}$<br>(Å) | $\epsilon_{TT}$<br>(Å) |
|--------------------|-----------------------------|---------------------------------------|--------------------------------|---------------------------------|----------------------|---------------------------------|----------------------|---------------------------------|----------------------|-----------------|-----------------|-----------------|------------------------|------------------------|
| PCOD8195611        | 12.40                       | 22.22                                 | 0.03                           | 1.6055                          | 0.0105               | 2.6215                          | 0.0302               | 3.0598                          | 0.0720               | 0.0393          | 0.1352          | 0.2520          | 0.0001                 | 0.0025                 |
| PCOD8323357        | 12.44                       | 22.78                                 | 0.38                           | 1.6067                          | 0.0114               | 2.6233                          | 0.0383               | 3.0530                          | 0.0702               | 0.0431          | 0.1948          | 0.2523          | 0.0001                 | 0.0016                 |
| PCOD8194009        | 12.45                       | 25.25                                 | 2.08                           | 1.6066                          | 0.0121               | 2.6232                          | 0.0341               | 3.0549                          | 0.0787               | 0.0420          | 0.1340          | 0.2485          | 0.0001                 | 0.0029                 |
| PCOD8288182        | 12.46                       | 21.04                                 | 0.78                           | 1.6047                          | 0.0122               | 2.6202                          | 0.0303               | 3.0624                          | 0.0826               | 0.0501          | 0.1528          | 0.2880          | 0.0000                 | 0.0013                 |
| PCOD8327491        | 12.48                       | 22.81                                 | 0.44                           | 1.6054                          | 0.0110               | 2.6214                          | 0.0283               | 3.0600                          | 0.0727               | 0.0348          | 0.1053          | 0.2139          | 0.0001                 | 0.0022                 |
| PCOD8256582        | 12.48                       | 23.00                                 | 0.57                           | 1.6051                          | 0.0143               | 2.6208                          | 0.0353               | 3.0613                          | 0.0858               | 0.0552          | 0.1674          | 0.2773          | 0.0000                 | 0.0022                 |
| PCOD8274203        | 12.48                       | 21.70                                 | 0.31                           | 1.6061                          | 0.0095               | 2.6225                          | 0.0273               | 3.0570                          | 0.0781               | 0.0362          | 0.1149          | 0.2701          | 0.0001                 | 0.0025                 |
| <u>PCOD8056809</u> | 12.49                       | 24.21                                 | 1.41                           | 1.6080                          | 0.0076               | 2.6251                          | 0.0427               | 3.0496                          | <u>0.1015</u>        | 0.0323          | 0.2304          | <u>0.3851</u>   | 0.0004                 | 0.0047                 |
| PCOD8292736        | 12.50                       | 19.84                                 | 1.57                           | 1.6043                          | 0.0059               | 2.6197                          | 0.0196               | 3.0658                          | 0.0631               | 0.0225          | 0.0802          | 0.1913          | 0.0001                 | 0.0029                 |
| PCOD8323374        | 12.50                       | 23.05                                 | 0.63                           | 1.6048                          | 0.0119               | 2.6204                          | 0.0271               | 3.0633                          | 0.0771               | 0.0461          | 0.1286          | 0.2109          | 0.0002                 | 0.0024                 |
| PCOD8193824        | 12.51                       | 23.14                                 | 0.70                           | 1.6056                          | 0.0113               | 2.6216                          | 0.0297               | 3.0594                          | 0.0747               | 0.0471          | 0.1395          | 0.2545          | 0.0000                 | 0.0026                 |
| PCOD8275094        | 12.51                       | 22.96                                 | 0.59                           | 1.6060                          | 0.0087               | 2.6222                          | 0.0295               | 3.0581                          | 0.0696               | 0.0337          | 0.1098          | 0.2062          | 0.0000                 | 0.0032                 |
| PCOD8275711        | 12.52                       | 21.58                                 | 0.36                           | 1.6055                          | 0.0080               | 2.6215                          | 0.0297               | 3.0602                          | 0.0761               | 0.0336          | 0.1214          | 0.2405          | 0.0000                 | 0.0030                 |
| PCOD8323375        | 12.53                       | 21.87                                 | 0.15                           | 1.6038                          | 0.0113               | 2.6188                          | 0.0244               | 3.0682                          | 0.0747               | 0.0439          | 0.1158          | 0.1909          | 0.0002                 | 0.0024                 |
| PCOD8256588        | 12.53                       | 22.74                                 | 0.45                           | 1.6053                          | 0.0131               | 2.6211                          | 0.0327               | 3.0606                          | 0.0858               | 0.0503          | 0.1544          | 0.2764          | 0.0000                 | 0.0022                 |
| PCOD8193821        | 12.54                       | 23.26                                 | 0.81                           | 1.6060                          | 0.0104               | 2.6224                          | 0.0304               | 3.0573                          | 0.0683               | 0.0372          | 0.1524          | 0.2481          | 0.0000                 | 0.0027                 |
| PCOD8193996        | 12.55                       | 22.91                                 | 0.59                           | 1.6057                          | 0.0114               | 2.6218                          | 0.0284               | 3.0587                          | 0.0731               | 0.0419          | 0.1053          | 0.2388          | 0.0000                 | 0.0024                 |
| <u>PCOD8327934</u> | 12.56                       | 22.47                                 | 0.30                           | 1.6068                          | 0.0144               | 2.6231                          | 0.0427               | 3.0529                          | <u>0.0927</u>        | 0.0494          | 0.1562          | 0.3020          | 0.0004                 | 0.0018                 |
| PCOD8256627        | 12.60                       | 20.97                                 | 0.69                           | 1.6057                          | 0.0115               | 2.6219                          | 0.0300               | 3.0568                          | 0.0837               | 0.0472          | 0.1544          | 0.2965          | 0.0000                 | 0.0007                 |
| PCOD8275789        | 12.61                       | 21.93                                 | 0.03                           | 1.6046                          | 0.0090               | 2.6199                          | 0.0344               | 3.0645                          | 0.0876               | 0.0353          | 0.1507          | 0.2484          | 0.0001                 | 0.0029                 |
| PCOD8317398        | 12.61                       | 22.25                                 | 0.19                           | 1.6057                          | 0.0100               | 2.6219                          | 0.0292               | 3.0594                          | 0.0793               | 0.0414          | 0.1221          | 0.2525          | 0.0001                 | 0.0033                 |
| PCOD8307693        | 12.62                       | 21.91                                 | 0.02                           | 1.6068                          | 0.0069               | 2.6235                          | 0.0305               | 3.0537                          | 0.0634               | 0.0247          | 0.1300          | 0.2129          | 0.0001                 | 0.0028                 |
| PCOD8314888        | 12.65                       | 22.50                                 | 0.40                           | 1.6068                          | 0.0088               | 2.6238                          | 0.0254               | 3.0532                          | 0.0684               | 0.0343          | 0.1095          | 0.2415          | 0.0001                 | 0.0025                 |
| PCOD8288254        | 12.66                       | 21.91                                 | 0.01                           | 1.6044                          | 0.0119               | 2.6197                          | 0.0317               | 3.0652                          | 0.0858               | 0.0408          | 0.1375          | 0.2625          | 0.0000                 | 0.0027                 |
| PCOD8311099        | 12.66                       | 21.47                                 | 0.29                           | 1.6062                          | 0.0067               | 2.6228                          | 0.0221               | 3.0564                          | 0.0678               | 0.0208          | 0.0831          | 0.1842          | 0.0002                 | 0.0027                 |
| <u>PCOD8255716</u> | 12.66                       | 22.44                                 | 0.38                           | 1.6039                          | 0.0135               | 2.6187                          | 0.0391               | 3.0670                          | 0.0785               | <u>0.0752</u>   | <u>0.3188</u>   | 0.3101          | 0.0001                 | 0.0020                 |
| <u>PCOD8167045</u> | 12.69                       | 21.90                                 | 0.03                           | 1.6053                          | 0.0093               | 2.6211                          | 0.0229               | 3.0624                          | <u>0.0965</u>        | 0.0342          | 0.1151          | <u>0.3569</u>   | 0.0000                 | 0.0043                 |
| PCOD8328373        | 12.69                       | 21.99                                 | 0.10                           | 1.6047                          | 0.0107               | 2.6203                          | 0.0304               | 3.0636                          | 0.0628               | 0.0395          | 0.1230          | 0.2317          | 0.0001                 | 0.0026                 |
| PCOD8194777        | 12.69                       | 22.10                                 | 0.17                           | 1.6045                          | 0.0121               | 2.6200                          | 0.0255               | 3.0637                          | 0.0799               | 0.0430          | 0.1098          | 0.2481          | 0.0001                 | 0.0018                 |
| PCOD8316639        | 12.71                       | 21.82                                 | 0.00                           | 1.6047                          | 0.0102               | 2.6204                          | 0.0203               | 3.0637                          | 0.0763               | 0.0456          | 0.1106          | 0.2214          | 0.0002                 | 0.0026                 |
| PCOD8287229        | 12.73                       | 21.77                                 | 0.02                           | 1.6064                          | 0.0114               | 2.6230                          | 0.0323               | 3.0542                          | 0.0810               | 0.0510          | 0.1615          | 0.2410          | 0.0001                 | 0.0015                 |



| Structure code     | FD<br>(T nm <sup>-3</sup> ) | $\Delta E$<br>(kJ mol <sup>-1</sup> ) | $\nu$<br>(T nm <sup>-3</sup> ) | $\langle D_{TO} \rangle$<br>(Å) | $\sigma_{TO}$<br>(Å) | $\langle D_{OO} \rangle$<br>(Å) | $\sigma_{OO}$<br>(Å) | $\langle D_{TT} \rangle$<br>(Å) | $\sigma_{TT}$<br>(Å) | $R_{TO}$<br>(Å) | $R_{OO}$<br>(Å) | $R_{TT}$<br>(Å) | $\epsilon_{OO}$<br>(Å) | $\epsilon_{TT}$<br>(Å) |
|--------------------|-----------------------------|---------------------------------------|--------------------------------|---------------------------------|----------------------|---------------------------------|----------------------|---------------------------------|----------------------|-----------------|-----------------|-----------------|------------------------|------------------------|
| PCOD8317982        | 12.75                       | 21.38                                 | 0.26                           | 1.6047                          | 0.0088               | 2.6203                          | 0.0214               | 3.0639                          | 0.0715               | 0.0341          | 0.1113          | 0.2258          | 0.0001                 | 0.0027                 |
| PCOD8194963        | 12.75                       | 22.61                                 | 0.58                           | 1.6043                          | 0.0125               | 2.6196                          | 0.0324               | 3.0655                          | 0.0800               | 0.0524          | 0.1589          | 0.2647          | 0.0000                 | 0.0024                 |
| PCOD8292723        | 12.76                       | 21.93                                 | 0.13                           | 1.6064                          | 0.0069               | 2.6230                          | 0.0244               | 3.0550                          | 0.0712               | 0.0252          | 0.1031          | 0.2186          | 0.0001                 | 0.0023                 |
| PCOD8309987        | 12.78                       | 20.60                                 | 0.77                           | 1.6069                          | 0.0091               | 2.6232                          | 0.0349               | 3.0512                          | 0.0727               | 0.0349          | 0.1973          | 0.2368          | 0.0005                 | 0.0007                 |
| PCOD8327305        | 12.78                       | 21.49                                 | 0.16                           | 1.6059                          | 0.0090               | 2.6222                          | 0.0344               | 3.0571                          | 0.0664               | 0.0354          | 0.1232          | 0.2159          | 0.0000                 | 0.0021                 |
| PCOD8292725        | 12.78                       | 21.72                                 | 0.00                           | 1.6072                          | 0.0065               | 2.6242                          | 0.0289               | 3.0517                          | 0.0616               | 0.0236          | 0.1127          | 0.2110          | 0.0000                 | 0.0025                 |
| PCOD8325399        | 12.78                       | 21.37                                 | 0.24                           | 1.6061                          | 0.0090               | 2.6224                          | 0.0349               | 3.0564                          | 0.0657               | 0.0355          | 0.1248          | 0.2178          | 0.0000                 | 0.0021                 |
| PCOD8265609        | 12.78                       | 22.24                                 | 0.36                           | 1.6052                          | 0.0116               | 2.6209                          | 0.0347               | 3.0610                          | 0.0699               | 0.0475          | 0.1558          | 0.2267          | 0.0000                 | 0.0021                 |
| PCOD8275720        | 12.81                       | 21.97                                 | 0.20                           | 1.6047                          | 0.0091               | 2.6200                          | 0.0340               | 3.0642                          | 0.0886               | 0.0361          | 0.1408          | 0.2520          | 0.0001                 | 0.0029                 |
| PCOD8255657        | 12.81                       | 21.33                                 | 0.23                           | 1.6073                          | 0.0107               | 2.6245                          | 0.0324               | 3.0501                          | 0.0744               | 0.0412          | 0.1575          | 0.2718          | 0.0001                 | 0.0018                 |
| PCOD8307183        | 12.82                       | 22.85                                 | 0.82                           | 1.6058                          | 0.0099               | 2.6222                          | 0.0231               | 3.0578                          | 0.0778               | 0.0325          | 0.1131          | 0.2328          | 0.0002                 | 0.0022                 |
| PCOD8195612        | 12.83                       | 21.07                                 | 0.40                           | 1.6043                          | 0.0108               | 2.6196                          | 0.0339               | 3.0655                          | 0.0677               | 0.0448          | 0.1678          | 0.2670          | 0.0001                 | 0.0023                 |
| PCOD8289711        | 12.85                       | 22.06                                 | 0.30                           | 1.6061                          | 0.0095               | 2.6226                          | 0.0256               | 3.0571                          | 0.0775               | 0.0395          | 0.1158          | 0.2424          | 0.0001                 | 0.0027                 |
| PCOD8286879        | 12.85                       | 22.87                                 | 0.85                           | 1.6061                          | 0.0107               | 2.6223                          | 0.0333               | 3.0573                          | 0.0714               | 0.0416          | 0.1270          | 0.2286          | 0.0002                 | 0.0031                 |
| PCOD8288147        | 12.85                       | 21.32                                 | 0.20                           | 1.6050                          | 0.0095               | 2.6207                          | 0.0281               | 3.0622                          | 0.0799               | 0.0460          | 0.1467          | 0.2390          | 0.0001                 | 0.0026                 |
| PCOD8322931        | 12.88                       | 22.31                                 | 0.50                           | 1.6040                          | 0.0114               | 2.6192                          | 0.0260               | 3.0670                          | 0.0770               | 0.0377          | 0.1031          | 0.2205          | 0.0002                 | 0.0024                 |
| PCOD8330275        | 12.88                       | 21.12                                 | 0.31                           | 1.6049                          | 0.0084               | 2.6205                          | 0.0332               | 3.0631                          | 0.0625               | 0.0281          | 0.1332          | 0.2123          | 0.0001                 | 0.0031                 |
| PCOD8297402        | 12.88                       | 22.52                                 | 0.65                           | 1.6064                          | 0.0107               | 2.6229                          | 0.0362               | 3.0558                          | 0.0801               | 0.0377          | 0.1528          | 0.2780          | 0.0000                 | 0.0029                 |
| PCOD8196467        | 12.91                       | 22.17                                 | 0.44                           | 1.6050                          | 0.0116               | 2.6207                          | 0.0314               | 3.0614                          | 0.0777               | 0.0468          | 0.1356          | 0.2544          | 0.0000                 | 0.0019                 |
| PCOD8309151        | 12.92                       | 20.84                                 | 0.46                           | 1.6064                          | 0.0093               | 2.6230                          | 0.0238               | 3.0540                          | 0.0623               | 0.0334          | 0.1010          | 0.2351          | 0.0001                 | 0.0011                 |
| PCOD8194964        | 12.93                       | 22.02                                 | 0.36                           | 1.6048                          | 0.0117               | 2.6204                          | 0.0254               | 3.0624                          | 0.0793               | 0.0417          | 0.1018          | 0.2421          | 0.0001                 | 0.0018                 |
| PCOD8196422        | 12.95                       | 21.76                                 | 0.19                           | 1.6045                          | 0.0091               | 2.6199                          | 0.0269               | 3.0652                          | 0.0720               | 0.0358          | 0.1280          | 0.2369          | 0.0001                 | 0.0030                 |
| PCOD8292735        | 12.95                       | 20.81                                 | 0.45                           | 1.6053                          | 0.0057               | 2.6213                          | 0.0193               | 3.0610                          | 0.0658               | 0.0193          | 0.0851          | 0.1817          | 0.0002                 | 0.0027                 |
| PCOD8193988        | 12.95                       | 22.33                                 | 0.59                           | 1.6044                          | 0.0122               | 2.6196                          | 0.0336               | 3.0652                          | 0.0723               | 0.0501          | 0.1606          | 0.2781          | 0.0000                 | 0.0025                 |
| PCOD8195613        | 12.96                       | 20.78                                 | 0.46                           | 1.6046                          | 0.0105               | 2.6200                          | 0.0309               | 3.0640                          | 0.0674               | 0.0464          | 0.1516          | 0.2622          | 0.0001                 | 0.0021                 |
| PCOD8286925        | 12.96                       | 22.79                                 | 0.92                           | 1.6068                          | 0.0106               | 2.6234                          | 0.0335               | 3.0537                          | 0.0686               | 0.0408          | 0.1359          | 0.2225          | 0.0001                 | 0.0028                 |
| <u>PCOD8160775</u> | 13.00                       | 21.14                                 | 0.18                           | 1.6038                          | 0.0103               | 2.6182                          | 0.0335               | 3.0710                          | <u>0.1035</u>        | 0.0376          | 0.1615          | <u>0.3645</u>   | 0.0005                 | <u>0.0054</u>          |
| PCOD8297424        | 13.01                       | 21.91                                 | 0.35                           | 1.6039                          | 0.0092               | 2.6188                          | 0.0341               | 3.0684                          | 0.0703               | 0.0374          | 0.1607          | 0.2416          | 0.0001                 | 0.0034                 |
| PCOD8328266        | 13.01                       | 20.95                                 | 0.30                           | 1.6029                          | 0.0106               | 2.6174                          | 0.0250               | 3.0724                          | 0.0742               | 0.0392          | 0.1046          | 0.2234          | 0.0002                 | 0.0026                 |
| PCOD8307692        | 13.01                       | 21.84                                 | 0.31                           | 1.6076                          | 0.0066               | 2.6249                          | 0.0269               | 3.0493                          | 0.0619               | 0.0237          | 0.0921          | 0.2021          | 0.0001                 | 0.0022                 |
| PCOD8194772        | 13.01                       | 22.63                                 | 0.85                           | 1.6047                          | 0.0108               | 2.6200                          | 0.0320               | 3.0638                          | 0.0783               | 0.0400          | 0.1425          | 0.2521          | 0.0002                 | 0.0027                 |

| Structure code | FD<br>(T nm <sup>-3</sup> ) | $\Delta E$<br>(kJ mol <sup>-1</sup> ) | $\nu$<br>(T nm <sup>-3</sup> ) | $\langle D_{TO} \rangle$<br>(Å) | $\sigma_{TO}$<br>(Å) | $\langle D_{OO} \rangle$<br>(Å) | $\sigma_{OO}$<br>(Å) | $\langle D_{TT} \rangle$<br>(Å) | $\sigma_{TT}$<br>(Å) | $R_{TO}$<br>(Å) | $R_{OO}$<br>(Å) | $R_{TT}$<br>(Å) | $\epsilon_{OO}$<br>(Å) | $\epsilon_{TT}$<br>(Å) |
|----------------|-----------------------------|---------------------------------------|--------------------------------|---------------------------------|----------------------|---------------------------------|----------------------|---------------------------------|----------------------|-----------------|-----------------|-----------------|------------------------|------------------------|
| PCOD8320075    | 13.02                       | 20.90                                 | 0.32                           | 1.6053                          | 0.0101               | 2.6208                          | 0.0369               | 3.0596                          | 0.0725               | 0.0407          | 0.1909          | 0.2567          | 0.0002                 | 0.0012                 |
| PCOD8287165    | 13.05                       | 22.30                                 | 0.66                           | 1.6065                          | 0.0089               | 2.6232                          | 0.0254               | 3.0551                          | 0.0818               | 0.0434          | 0.1149          | 0.2399          | 0.0001                 | 0.0028                 |
| PCOD8330350    | 13.06                       | 21.39                                 | 0.05                           | 1.6060                          | 0.0124               | 2.6221                          | 0.0401               | 3.0562                          | 0.0651               | 0.0494          | 0.1364          | 0.2495          | 0.0003                 | 0.0016                 |
| PCOD8193825    | 13.08                       | 21.41                                 | 0.09                           | 1.6045                          | 0.0111               | 2.6198                          | 0.0292               | 3.0646                          | 0.0706               | 0.0520          | 0.1366          | 0.2735          | 0.0000                 | 0.0024                 |
| PCOD8292652    | 13.09                       | 21.84                                 | 0.39                           | 1.6058                          | 0.0076               | 2.6220                          | 0.0260               | 3.0584                          | 0.0672               | 0.0288          | 0.0996          | 0.2164          | 0.0001                 | 0.0027                 |
| PCOD8331110    | 13.09                       | 21.82                                 | 0.37                           | 1.6054                          | 0.0071               | 2.6212                          | 0.0280               | 3.0607                          | 0.0644               | 0.0300          | 0.1075          | 0.2185          | 0.0000                 | 0.0029                 |
| PCOD8200942    | 13.11                       | 21.99                                 | 0.51                           | 1.6065                          | 0.0080               | 2.6232                          | 0.0253               | 3.0549                          | 0.0657               | 0.0332          | 0.0962          | 0.2389          | 0.0002                 | 0.0025                 |
| PCOD8256583    | 13.13                       | 21.54                                 | 0.23                           | 1.6067                          | 0.0095               | 2.6235                          | 0.0304               | 3.0538                          | 0.0744               | 0.0324          | 0.1125          | 0.2328          | 0.0001                 | 0.0026                 |
| PCOD8265568    | 13.13                       | 23.35                                 | 1.47                           | 1.6054                          | 0.0114               | 2.6214                          | 0.0304               | 3.0602                          | 0.0698               | 0.0370          | 0.1254          | 0.2263          | 0.0001                 | 0.0025                 |
| PCOD8196461    | 13.16                       | 22.84                                 | 1.14                           | 1.6050                          | 0.0111               | 2.6206                          | 0.0311               | 3.0622                          | 0.0817               | 0.0405          | 0.1206          | 0.2483          | 0.0001                 | 0.0025                 |
| PCOD8287111    | 13.16                       | 19.52                                 | 1.13                           | 1.6035                          | 0.0084               | 2.6183                          | 0.0260               | 3.0691                          | 0.0713               | 0.0357          | 0.1057          | 0.2165          | 0.0001                 | 0.0021                 |
| PCOD8207798    | 13.16                       | 20.99                                 | 0.12                           | 1.6042                          | 0.0117               | 2.6193                          | 0.0367               | 3.0658                          | 0.0813               | 0.0535          | 0.2535          | 0.3003          | 0.0002                 | 0.0024                 |
| PCOD8256584    | 13.16                       | 22.27                                 | 0.76                           | 1.6056                          | 0.0125               | 2.6216                          | 0.0336               | 3.0589                          | 0.0723               | 0.0496          | 0.1699          | 0.2545          | 0.0000                 | 0.0021                 |
| PCOD8287218    | 13.18                       | 20.61                                 | 0.36                           | 1.6058                          | 0.0091               | 2.6219                          | 0.0291               | 3.0580                          | 0.0590               | 0.0311          | 0.1148          | 0.2129          | 0.0000                 | 0.0021                 |
| PCOD8313426    | 13.19                       | 18.27                                 | 1.95                           | 1.6052                          | 0.0094               | 2.6203                          | 0.0378               | 3.0597                          | 0.0724               | 0.0535          | 0.1984          | 0.2903          | 0.0007                 | 0.0010                 |
| PCOD8195610    | 13.19                       | 22.87                                 | 1.20                           | 1.6057                          | 0.0111               | 2.6218                          | 0.0361               | 3.0592                          | 0.0727               | 0.0400          | 0.1384          | 0.2316          | 0.0000                 | 0.0029                 |
| PCOD8255656    | 13.23                       | 22.14                                 | 0.73                           | 1.6067                          | 0.0102               | 2.6235                          | 0.0312               | 3.0541                          | 0.0780               | 0.0368          | 0.1176          | 0.2566          | 0.0001                 | 0.0028                 |
| PCOD8265696    | 13.24                       | 20.50                                 | 0.38                           | 1.6032                          | 0.0111               | 2.6177                          | 0.0276               | 3.0709                          | 0.0706               | 0.0427          | 0.0910          | 0.2346          | 0.0001                 | 0.0022                 |
| PCOD8312122    | 13.24                       | 22.37                                 | 0.91                           | 1.6081                          | 0.0121               | 2.6256                          | 0.0378               | 3.0446                          | 0.0565               | 0.0553          | 0.2289          | 0.2516          | 0.0001                 | 0.0002                 |
| PCOD8320052    | 13.27                       | 22.69                                 | 1.15                           | 1.6066                          | 0.0103               | 2.6234                          | 0.0263               | 3.0536                          | 0.0681               | 0.0404          | 0.1243          | 0.2167          | 0.0001                 | 0.0018                 |
| PCOD8323836    | 13.27                       | 21.97                                 | 0.66                           | 1.6069                          | 0.0090               | 2.6238                          | 0.0342               | 3.0518                          | 0.0533               | 0.0370          | 0.1471          | 0.2400          | 0.0000                 | 0.0016                 |
| PCOD8298162    | 13.27                       | 21.84                                 | 0.58                           | 1.6042                          | 0.0137               | 2.6192                          | 0.0352               | 3.0662                          | 0.0852               | 0.0469          | 0.1554          | 0.2727          | 0.0001                 | 0.0024                 |
| PCOD8275115    | 13.28                       | 19.97                                 | 0.70                           | 1.6050                          | 0.0061               | 2.6208                          | 0.0211               | 3.0624                          | 0.0621               | 0.0199          | 0.0959          | 0.1877          | 0.0002                 | 0.0026                 |
| PCOD8194967    | 13.29                       | 20.51                                 | 0.32                           | 1.6027                          | 0.0122               | 2.6169                          | 0.0318               | 3.0732                          | 0.0742               | 0.0556          | 0.1533          | 0.2805          | 0.0000                 | 0.0022                 |
| PCOD8193851    | 13.30                       | 20.75                                 | 0.15                           | 1.6042                          | 0.0093               | 2.6193                          | 0.0298               | 3.0663                          | 0.0681               | 0.0408          | 0.1199          | 0.2428          | 0.0001                 | 0.0027                 |
| PCOD8298141    | 13.33                       | 21.06                                 | 0.09                           | 1.6046                          | 0.0125               | 2.6200                          | 0.0259               | 3.0628                          | 0.0752               | 0.0422          | 0.1018          | 0.2430          | 0.0001                 | 0.0010                 |
| PCOD8329329    | 13.33                       | 21.70                                 | 0.54                           | 1.6063                          | 0.0080               | 2.6229                          | 0.0184               | 3.0555                          | 0.0681               | 0.0325          | 0.1104          | 0.2152          | 0.0002                 | 0.0021                 |
| PCOD8194011    | 13.33                       | 21.03                                 | 0.08                           | 1.6047                          | 0.0102               | 2.6202                          | 0.0283               | 3.0636                          | 0.0687               | 0.0385          | 0.1191          | 0.2263          | 0.0000                 | 0.0023                 |
| PCOD8298135    | 13.34                       | 21.07                                 | 0.12                           | 1.6040                          | 0.0115               | 2.6189                          | 0.0352               | 3.0669                          | 0.0785               | 0.0430          | 0.1476          | 0.2411          | 0.0001                 | 0.0023                 |
| PCOD8329327    | 13.35                       | 21.93                                 | 0.71                           | 1.6072                          | 0.0090               | 2.6242                          | 0.0313               | 3.0507                          | 0.0559               | 0.0361          | 0.1325          | 0.2191          | 0.0000                 | 0.0016                 |
| PCOD8308133    | 13.36                       | 21.43                                 | 0.38                           | 1.6049                          | 0.0102               | 2.6202                          | 0.0436               | 3.0621                          | 0.0677               | 0.0391          | 0.1643          | 0.2089          | 0.0002                 | 0.0018                 |

| Structure code     | FD<br>(T nm <sup>-3</sup> ) | $\Delta E$<br>(kJ mol <sup>-1</sup> ) | $\nu$<br>(T nm <sup>-3</sup> ) | $\langle D_{TO} \rangle$<br>(Å) | $\sigma_{TO}$<br>(Å) | $\langle D_{OO} \rangle$<br>(Å) | $\sigma_{OO}$<br>(Å) | $\langle D_{TT} \rangle$<br>(Å) | $\sigma_{TT}$<br>(Å) | $R_{TO}$<br>(Å) | $R_{OO}$<br>(Å) | $R_{TT}$<br>(Å) | $\epsilon_{OO}$<br>(Å) | $\epsilon_{TT}$<br>(Å) |
|--------------------|-----------------------------|---------------------------------------|--------------------------------|---------------------------------|----------------------|---------------------------------|----------------------|---------------------------------|----------------------|-----------------|-----------------|-----------------|------------------------|------------------------|
| PCOD8328231        | 13.37                       | 20.64                                 | 0.15                           | 1.6070                          | 0.0098               | 2.6238                          | 0.0293               | 3.0505                          | 0.0642               | 0.0374          | 0.1150          | 0.2229          | 0.0000                 | 0.0003                 |
| PCOD8274923        | 13.39                       | 21.81                                 | 0.67                           | 1.6064                          | 0.0076               | 2.6231                          | 0.0226               | 3.0552                          | 0.0660               | 0.0333          | 0.0866          | 0.2387          | 0.0002                 | 0.0024                 |
| PCOD8314793        | 13.39                       | 21.16                                 | 0.23                           | 1.6072                          | 0.0092               | 2.6242                          | 0.0253               | 3.0504                          | 0.0692               | 0.0383          | 0.1524          | 0.2266          | 0.0000                 | 0.0013                 |
| PCOD8314890        | 13.39                       | 20.46                                 | 0.25                           | 1.6056                          | 0.0075               | 2.6216                          | 0.0282               | 3.0594                          | 0.0574               | 0.0272          | 0.1218          | 0.2076          | 0.0000                 | 0.0026                 |
| PCOD8269770        | 13.39                       | 21.38                                 | 0.38                           | 1.6047                          | 0.0086               | 2.6203                          | 0.0207               | 3.0639                          | 0.0716               | 0.0343          | 0.1112          | 0.2262          | 0.0002                 | 0.0027                 |
| PCOD8311295        | 13.42                       | 20.82                                 | 0.02                           | 1.6069                          | 0.0099               | 2.6239                          | 0.0213               | 3.0516                          | 0.0677               | 0.0405          | 0.0832          | 0.2136          | 0.0002                 | 0.0013                 |
| PCOD8288263        | 13.42                       | 19.71                                 | 0.73                           | 1.6047                          | 0.0091               | 2.6202                          | 0.0314               | 3.0629                          | 0.0806               | 0.0374          | 0.1434          | 0.2487          | 0.0000                 | 0.0020                 |
| PCOD8303095        | 13.44                       | 22.06                                 | 0.89                           | 1.6076                          | 0.0120               | 2.6247                          | 0.0330               | 3.0472                          | 0.0754               | 0.0361          | 0.1338          | 0.2575          | 0.0001                 | 0.0002                 |
| PCOD8288101        | 13.44                       | 20.89                                 | 0.09                           | 1.6060                          | 0.0084               | 2.6223                          | 0.0281               | 3.0571                          | 0.0732               | 0.0332          | 0.1135          | 0.2254          | 0.0001                 | 0.0022                 |
| PCOD8287396        | 13.45                       | 21.61                                 | 0.60                           | 1.6059                          | 0.0120               | 2.6221                          | 0.0334               | 3.0570                          | 0.0887               | 0.0433          | 0.1507          | 0.3012          | 0.0001                 | 0.0016                 |
| <u>PCOD8060369</u> | 13.49                       | 21.47                                 | 0.53                           | 1.6036                          | 0.0091               | 2.6177                          | 0.0524               | 3.0692                          | 0.0827               | 0.0461          | <u>0.2793</u>   | 0.2708          | 0.0006                 | 0.0027                 |
| PCOD8328754        | 13.49                       | 20.99                                 | 0.21                           | 1.6079                          | 0.0122               | 2.6249                          | 0.0442               | 3.0467                          | 0.0742               | 0.0445          | 0.2042          | 0.2415          | 0.0004                 | 0.0012                 |
| PCOD8196703        | 13.51                       | 21.10                                 | 0.30                           | 1.6042                          | 0.0117               | 2.6194                          | 0.0331               | 3.0650                          | 0.0751               | 0.0566          | 0.1910          | 0.2845          | 0.0000                 | 0.0016                 |
| PCOD8197313        | 13.52                       | 20.46                                 | 0.12                           | 1.6037                          | 0.0101               | 2.6185                          | 0.0301               | 3.0685                          | 0.0733               | 0.0488          | 0.1538          | 0.2594          | 0.0000                 | 0.0024                 |
| PCOD8265550        | 13.52                       | 20.97                                 | 0.22                           | 1.6059                          | 0.0118               | 2.6218                          | 0.0421               | 3.0564                          | 0.0594               | 0.0511          | 0.2255          | 0.2201          | 0.0004                 | 0.0012                 |
| PCOD8303406        | 13.52                       | 21.77                                 | 0.78                           | 1.6078                          | 0.0146               | 2.6246                          | 0.0490               | 3.0462                          | 0.0569               | 0.0609          | 0.1892          | 0.2148          | 0.0005                 | 0.0000                 |
| PCOD8301801        | 13.53                       | 20.89                                 | 0.18                           | 1.6060                          | 0.0065               | 2.6222                          | 0.0320               | 3.0570                          | 0.0603               | 0.0256          | 0.1257          | 0.1999          | 0.0001                 | 0.0020                 |
| PCOD8256590        | 13.53                       | 20.56                                 | 0.05                           | 1.6041                          | 0.0095               | 2.6193                          | 0.0322               | 3.0663                          | 0.0774               | 0.0358          | 0.1271          | 0.2267          | 0.0000                 | 0.0024                 |
| PCOD8195289        | 13.54                       | 20.00                                 | 0.41                           | 1.6025                          | 0.0107               | 2.6165                          | 0.0340               | 3.0748                          | 0.0721               | 0.0456          | 0.1358          | 0.2561          | 0.0001                 | 0.0027                 |
| PCOD8325423        | 13.54                       | 20.41                                 | 0.13                           | 1.6077                          | 0.0127               | 2.6252                          | 0.0348               | 3.0467                          | 0.0506               | 0.0476          | 0.1322          | 0.2193          | 0.0001                 | 0.0004                 |
| PCOD8265317        | 13.55                       | 20.22                                 | 0.25                           | 1.6037                          | 0.0085               | 2.6185                          | 0.0290               | 3.0683                          | 0.0482               | 0.0375          | 0.1399          | 0.1879          | 0.0001                 | 0.0021                 |
| PCOD8196488        | 13.56                       | 20.75                                 | 0.11                           | 1.6045                          | 0.0090               | 2.6199                          | 0.0217               | 3.0646                          | 0.0706               | 0.0387          | 0.1187          | 0.2491          | 0.0002                 | 0.0023                 |
| PCOD8292270        | 13.58                       | 21.74                                 | 0.81                           | 1.6062                          | 0.0100               | 2.6228                          | 0.0290               | 3.0559                          | 0.0793               | 0.0366          | 0.1156          | 0.2579          | 0.0001                 | 0.0023                 |
| PCOD8196716        | 13.60                       | 20.72                                 | 0.13                           | 1.6043                          | 0.0089               | 2.6197                          | 0.0232               | 3.0652                          | 0.0719               | 0.0342          | 0.1225          | 0.2463          | 0.0002                 | 0.0023                 |
| PCOD8197302        | 13.60                       | 20.82                                 | 0.20                           | 1.6034                          | 0.0095               | 2.6180                          | 0.0289               | 3.0702                          | 0.0775               | 0.0384          | 0.1227          | 0.2298          | 0.0001                 | 0.0029                 |
| PCOD8265707        | 13.60                       | 20.76                                 | 0.16                           | 1.6054                          | 0.0122               | 2.6211                          | 0.0372               | 3.0586                          | 0.0635               | 0.0529          | 0.1563          | 0.2341          | 0.0002                 | 0.0009                 |
| PCOD8326837        | 13.61                       | 19.88                                 | 0.43                           | 1.6082                          | 0.0091               | 2.6259                          | 0.0308               | 3.0443                          | 0.0442               | 0.0447          | 0.1088          | 0.2008          | 0.0000                 | 0.0003                 |
| PCOD8328645        | 13.63                       | 21.31                                 | 0.57                           | 1.6071                          | 0.0105               | 2.6241                          | 0.0281               | 3.0504                          | 0.0524               | 0.0419          | 0.1014          | 0.2253          | 0.0001                 | 0.0008                 |
| PCOD8317699        | 13.63                       | 20.48                                 | 0.00                           | 1.6040                          | 0.0115               | 2.6187                          | 0.0387               | 3.0677                          | 0.0647               | 0.0403          | 0.1499          | 0.2340          | 0.0004                 | 0.0032                 |
| PCOD8275237        | 13.64                       | 21.35                                 | 0.61                           | 1.6085                          | 0.0075               | 2.6264                          | 0.0334               | 3.0432                          | 0.0556               | 0.0342          | 0.1753          | 0.2058          | 0.0000                 | 0.0007                 |
| PCOD8293227        | 13.64                       | 21.51                                 | 0.72                           | 1.6057                          | 0.0082               | 2.6218                          | 0.0308               | 3.0591                          | 0.0766               | 0.0329          | 0.1191          | 0.2244          | 0.0001                 | 0.0027                 |

| Structure code     | FD<br>(T nm <sup>-3</sup> ) | $\Delta E$<br>(kJ mol <sup>-1</sup> ) | $\nu$<br>(T nm <sup>-3</sup> ) | $\langle D_{TO} \rangle$<br>(Å) | $\sigma_{TO}$<br>(Å) | $\langle D_{OO} \rangle$<br>(Å) | $\sigma_{OO}$<br>(Å) | $\langle D_{TT} \rangle$<br>(Å) | $\sigma_{TT}$<br>(Å) | $R_{TO}$<br>(Å) | $R_{OO}$<br>(Å) | $R_{TT}$<br>(Å) | $\epsilon_{OO}$<br>(Å) | $\epsilon_{TT}$<br>(Å) |
|--------------------|-----------------------------|---------------------------------------|--------------------------------|---------------------------------|----------------------|---------------------------------|----------------------|---------------------------------|----------------------|-----------------|-----------------|-----------------|------------------------|------------------------|
| PCOD8265151        | 13.65                       | 21.66                                 | 0.83                           | 1.6058                          | 0.0100               | 2.6221                          | 0.0262               | 3.0580                          | 0.0703               | 0.0338          | 0.1174          | 0.2180          | 0.0001                 | 0.0024                 |
| PCOD8275122        | 13.67                       | 20.69                                 | 0.19                           | 1.6054                          | 0.0056               | 2.6214                          | 0.0281               | 3.0606                          | 0.0645               | 0.0194          | 0.0862          | 0.1819          | 0.0001                 | 0.0026                 |
| PCOD8196700        | 13.70                       | 20.05                                 | 0.22                           | 1.6036                          | 0.0107               | 2.6184                          | 0.0305               | 3.0681                          | 0.0729               | 0.0454          | 0.1521          | 0.2420          | 0.0000                 | 0.0017                 |
| PCOD8195290        | 13.70                       | 19.82                                 | 0.38                           | 1.6035                          | 0.0105               | 2.6183                          | 0.0245               | 3.0686                          | 0.0741               | 0.0405          | 0.1141          | 0.2451          | 0.0001                 | 0.0016                 |
| PCOD8323838        | 13.70                       | 19.89                                 | 0.33                           | 1.6075                          | 0.0053               | 2.6249                          | 0.0251               | 3.0488                          | 0.0360               | 0.0193          | 0.0821          | 0.1164          | 0.0002                 | 0.0015                 |
| PCOD8298125        | 13.71                       | 21.76                                 | 0.96                           | 1.6045                          | 0.0120               | 2.6198                          | 0.0287               | 3.0640                          | 0.0767               | 0.0432          | 0.1173          | 0.2310          | 0.0001                 | 0.0016                 |
| PCOD8267100        | 13.74                       | 21.40                                 | 0.74                           | 1.6041                          | 0.0107               | 2.6193                          | 0.0296               | 3.0667                          | 0.0835               | 0.0447          | 0.1267          | 0.2410          | 0.0001                 | 0.0027                 |
| PCOD8315812        | 13.75                       | 20.52                                 | 0.14                           | 1.6047                          | 0.0119               | 2.6198                          | 0.0408               | 3.0630                          | 0.0618               | 0.0509          | 0.1849          | 0.2170          | 0.0004                 | 0.0017                 |
| PCOD8256706        | 13.76                       | 20.80                                 | 0.35                           | 1.6049                          | 0.0094               | 2.6205                          | 0.0310               | 3.0620                          | 0.0848               | 0.0344          | 0.1272          | 0.2388          | 0.0000                 | 0.0019                 |
| PCOD8275117        | 13.78                       | 19.70                                 | 0.38                           | 1.6050                          | 0.0060               | 2.6209                          | 0.0225               | 3.0620                          | 0.0600               | 0.0198          | 0.0931          | 0.1870          | 0.0002                 | 0.0025                 |
| PCOD8297293        | 13.79                       | 20.34                                 | 0.06                           | 1.6065                          | 0.0086               | 2.6229                          | 0.0357               | 3.0539                          | 0.0490               | 0.0392          | 0.1165          | 0.1716          | 0.0002                 | 0.0015                 |
| PCOD8287179        | 13.79                       | 20.30                                 | 0.04                           | 1.6060                          | 0.0110               | 2.6222                          | 0.0310               | 3.0558                          | 0.0677               | 0.0479          | 0.1640          | 0.2604          | 0.0000                 | 0.0010                 |
| PCOD8299421        | 13.80                       | 20.00                                 | 0.15                           | 1.6044                          | 0.0069               | 2.6198                          | 0.0190               | 3.0652                          | 0.0615               | 0.0344          | 0.0780          | 0.1826          | 0.0002                 | 0.0025                 |
| PCOD8265367        | 13.81                       | 20.82                                 | 0.41                           | 1.6045                          | 0.0133               | 2.6194                          | 0.0467               | 3.0634                          | 0.0633               | 0.0506          | 0.1645          | 0.1800          | 0.0005                 | 0.0014                 |
| PCOD8275293        | 13.84                       | 19.31                                 | 0.59                           | 1.6040                          | 0.0124               | 2.6189                          | 0.0350               | 3.0662                          | 0.0789               | 0.0473          | 0.1913          | 0.2687          | 0.0001                 | 0.0016                 |
| PCOD8328391        | 13.84                       | 19.97                                 | 0.14                           | 1.6069                          | 0.0089               | 2.6238                          | 0.0225               | 3.0510                          | 0.0531               | 0.0301          | 0.1024          | 0.2117          | 0.0001                 | 0.0005                 |
| PCOD8266160        | 13.86                       | 20.48                                 | 0.23                           | 1.6069                          | 0.0110               | 2.6232                          | 0.0458               | 3.0513                          | 0.0632               | 0.0417          | 0.1959          | 0.2217          | 0.0005                 | 0.0007                 |
| PCOD8269892        | 13.86                       | 20.84                                 | 0.48                           | 1.6044                          | 0.0087               | 2.6198                          | 0.0228               | 3.0651                          | 0.0723               | 0.0350          | 0.1230          | 0.2510          | 0.0001                 | 0.0024                 |
| PCOD8319324        | 13.87                       | 20.81                                 | 0.46                           | 1.6054                          | 0.0087               | 2.6214                          | 0.0261               | 3.0595                          | 0.0660               | 0.0360          | 0.0903          | 0.2153          | 0.0001                 | 0.0018                 |
| PCOD8200214        | 13.87                       | 20.70                                 | 0.39                           | 1.6046                          | 0.0090               | 2.6201                          | 0.0199               | 3.0641                          | 0.0692               | 0.0333          | 0.1141          | 0.2333          | 0.0001                 | 0.0023                 |
| PCOD8328215        | 13.90                       | 20.09                                 | 0.00                           | 1.6074                          | 0.0055               | 2.6247                          | 0.0203               | 3.0500                          | 0.0425               | 0.0215          | 0.0832          | 0.1253          | 0.0002                 | 0.0019                 |
| PCOD8256619        | 13.90                       | 20.61                                 | 0.36                           | 1.6047                          | 0.0092               | 2.6202                          | 0.0319               | 3.0630                          | 0.0838               | 0.0346          | 0.1316          | 0.2371          | 0.0000                 | 0.0019                 |
| PCOD8328398        | 13.91                       | 20.86                                 | 0.54                           | 1.6051                          | 0.0093               | 2.6207                          | 0.0324               | 3.0618                          | 0.0627               | 0.0340          | 0.1468          | 0.2197          | 0.0000                 | 0.0024                 |
| PCOD8197948        | 13.91                       | 20.47                                 | 0.27                           | 1.6029                          | 0.0102               | 2.6172                          | 0.0308               | 3.0724                          | 0.0779               | 0.0399          | 0.1464          | 0.2268          | 0.0001                 | 0.0026                 |
| <u>PCOD8224235</u> | 13.92                       | 19.81                                 | 0.17                           | 1.6041                          | 0.0092               | 2.6190                          | 0.0263               | 3.0679                          | <u>0.1021</u>        | 0.0379          | 0.1239          | <u>0.3681</u>   | 0.0001                 | 0.0038                 |
| PCOD8329311        | 13.93                       | 20.68                                 | 0.44                           | 1.6050                          | 0.0084               | 2.6206                          | 0.0300               | 3.0627                          | 0.0565               | 0.0365          | 0.1217          | 0.2250          | 0.0000                 | 0.0028                 |
| PCOD8255636        | 13.95                       | 20.43                                 | 0.29                           | 1.6044                          | 0.0119               | 2.6195                          | 0.0358               | 3.0641                          | 0.0738               | 0.0496          | 0.1964          | 0.2662          | 0.0002                 | 0.0015                 |
| PCOD8207198        | 13.95                       | 20.98                                 | 0.66                           | 1.6038                          | 0.0102               | 2.6184                          | 0.0404               | 3.0689                          | 0.0855               | 0.0462          | 0.1566          | 0.2723          | 0.0004                 | 0.0035                 |
| PCOD8287889        | 13.95                       | 20.61                                 | 0.41                           | 1.6063                          | 0.0133               | 2.6226                          | 0.0365               | 3.0542                          | 0.0596               | 0.0493          | 0.1452          | 0.2273          | 0.0001                 | 0.0007                 |
| PCOD8275434        | 13.95                       | 20.87                                 | 0.59                           | 1.6081                          | 0.0100               | 2.6257                          | 0.0375               | 3.0453                          | 0.0741               | 0.0376          | 0.1638          | 0.2964          | 0.0001                 | 0.0010                 |
| PCOD8328938        | 13.96                       | 20.89                                 | 0.62                           | 1.6053                          | 0.0114               | 2.6212                          | 0.0290               | 3.0599                          | 0.0588               | 0.0381          | 0.1354          | 0.2207          | 0.0001                 | 0.0016                 |

| Structure code     | FD<br>(T nm <sup>-3</sup> ) | $\Delta E$<br>(kJ mol <sup>-1</sup> ) | $\nu$<br>(T nm <sup>-3</sup> ) | $\langle D_{TO} \rangle$<br>(Å) | $\sigma_{TO}$<br>(Å) | $\langle D_{OO} \rangle$<br>(Å) | $\sigma_{OO}$<br>(Å) | $\langle D_{TT} \rangle$<br>(Å) | $\sigma_{TT}$<br>(Å) | $R_{TO}$<br>(Å) | $R_{OO}$<br>(Å) | $R_{TT}$<br>(Å) | $\epsilon_{OO}$<br>(Å) | $\epsilon_{TT}$<br>(Å) |
|--------------------|-----------------------------|---------------------------------------|--------------------------------|---------------------------------|----------------------|---------------------------------|----------------------|---------------------------------|----------------------|-----------------|-----------------|-----------------|------------------------|------------------------|
| PCOD8256599        | 13.96                       | 20.01                                 | 0.01                           | 1.6062                          | 0.0111               | 2.6225                          | 0.0324               | 3.0547                          | 0.0660               | 0.0469          | 0.1630          | 0.2411          | 0.0001                 | 0.0009                 |
| PCOD8266000        | 13.99                       | 20.34                                 | 0.26                           | 1.6043                          | 0.0082               | 2.6196                          | 0.0252               | 3.0655                          | 0.0670               | 0.0365          | 0.1091          | 0.2457          | 0.0000                 | 0.0026                 |
| PCOD8267108        | 13.99                       | 19.58                                 | 0.25                           | 1.6028                          | 0.0122               | 2.6171                          | 0.0250               | 3.0720                          | 0.0728               | 0.0458          | 0.1138          | 0.2501          | 0.0001                 | 0.0014                 |
| PCOD8297653        | 14.03                       | 19.57                                 | 0.21                           | 1.6060                          | 0.0108               | 2.6219                          | 0.0376               | 3.0550                          | 0.0625               | 0.0437          | 0.2090          | 0.2414          | 0.0003                 | 0.0000                 |
| PCOD8298176        | 14.05                       | 19.47                                 | 0.27                           | 1.6049                          | 0.0068               | 2.6205                          | 0.0272               | 3.0621                          | 0.0603               | 0.0251          | 0.1067          | 0.1988          | 0.0001                 | 0.0019                 |
| PCOD8297464        | 14.06                       | 20.09                                 | 0.16                           | 1.6034                          | 0.0121               | 2.6179                          | 0.0381               | 3.0703                          | 0.0800               | 0.0460          | 0.1665          | 0.2599          | 0.0002                 | 0.0029                 |
| PCOD8330346        | 14.06                       | 20.41                                 | 0.38                           | 1.6033                          | 0.0120               | 2.6177                          | 0.0390               | 3.0709                          | 0.0819               | 0.0474          | 0.1634          | 0.2612          | 0.0002                 | 0.0031                 |
| PCOD8195614        | 14.09                       | 20.34                                 | 0.37                           | 1.6045                          | 0.0102               | 2.6199                          | 0.0333               | 3.0643                          | 0.0660               | 0.0418          | 0.1468          | 0.2495          | 0.0000                 | 0.0021                 |
| PCOD8275569        | 14.10                       | 20.31                                 | 0.35                           | 1.6082                          | 0.0128               | 2.6256                          | 0.0379               | 3.0427                          | 0.0644               | 0.0529          | 0.2012          | 0.2473          | 0.0003                 | 0.0012                 |
| PCOD8172248        | 14.10                       | 19.87                                 | 0.06                           | 1.6067                          | 0.0087               | 2.6235                          | 0.0242               | 3.0518                          | 0.0531               | 0.0268          | 0.1094          | 0.2077          | 0.0001                 | 0.0005                 |
| <u>PCOD8217478</u> | 14.10                       | 20.26                                 | 0.32                           | 1.6046                          | 0.0074               | 2.6195                          | 0.0342               | 3.0672                          | <u>0.1082</u>        | 0.0275          | 0.1629          | <u>0.3693</u>   | 0.0004                 | <u>0.0055</u>          |
| PCOD8265628        | 14.10                       | 19.48                                 | 0.21                           | 1.6087                          | 0.0089               | 2.6267                          | 0.0254               | 3.0398                          | 0.0526               | 0.0333          | 0.1136          | 0.2161          | 0.0001                 | 0.0018                 |
| PCOD8299431        | 14.10                       | 19.58                                 | 0.15                           | 1.6064                          | 0.0090               | 2.6230                          | 0.0332               | 3.0537                          | 0.0650               | 0.0358          | 0.1157          | 0.2502          | 0.0000                 | 0.0011                 |
| PCOD8255669        | 14.11                       | 20.09                                 | 0.22                           | 1.6060                          | 0.0117               | 2.6221                          | 0.0359               | 3.0561                          | 0.0649               | 0.0500          | 0.1841          | 0.2193          | 0.0001                 | 0.0010                 |
| PCOD8307695        | 14.12                       | 20.21                                 | 0.31                           | 1.6069                          | 0.0086               | 2.6236                          | 0.0345               | 3.0520                          | 0.0386               | 0.0455          | 0.1379          | 0.1434          | 0.0000                 | 0.0014                 |
| PCOD8200326        | 14.13                       | 20.14                                 | 0.27                           | 1.6039                          | 0.0087               | 2.6190                          | 0.0250               | 3.0676                          | 0.0699               | 0.0386          | 0.1002          | 0.2450          | 0.0001                 | 0.0026                 |
| PCOD8059486        | 14.14                       | 19.93                                 | 0.13                           | 1.6038                          | 0.0068               | 2.6188                          | 0.0207               | 3.0682                          | 0.0655               | 0.0313          | 0.0967          | 0.2064          | 0.0001                 | 0.0027                 |
| PCOD8293232        | 14.16                       | 20.25                                 | 0.38                           | 1.6045                          | 0.0123               | 2.6195                          | 0.0381               | 3.0637                          | 0.0737               | 0.0496          | 0.1937          | 0.2523          | 0.0002                 | 0.0014                 |
| PCOD8309154        | 14.16                       | 20.42                                 | 0.50                           | 1.6070                          | 0.0080               | 2.6240                          | 0.0333               | 3.0516                          | 0.0331               | 0.0276          | 0.1325          | 0.1296          | 0.0000                 | 0.0019                 |
| PCOD8275433        | 14.18                       | 20.42                                 | 0.52                           | 1.6055                          | 0.0102               | 2.6214                          | 0.0334               | 3.0589                          | 0.0734               | 0.0402          | 0.1392          | 0.2360          | 0.0000                 | 0.0016                 |
| PCOD8267700        | 14.19                       | 19.26                                 | 0.28                           | 1.6048                          | 0.0123               | 2.6202                          | 0.0381               | 3.0614                          | 0.0761               | 0.0480          | 0.1635          | 0.2467          | 0.0001                 | 0.0007                 |
| PCOD8325760        | 14.20                       | 19.44                                 | 0.13                           | 1.6038                          | 0.0095               | 2.6185                          | 0.0378               | 3.0671                          | 0.0598               | 0.0335          | 0.1744          | 0.2234          | 0.0002                 | 0.0016                 |
| PCOD8297555        | 14.21                       | 19.85                                 | 0.15                           | 1.6066                          | 0.0092               | 2.6233                          | 0.0325               | 3.0534                          | 0.0678               | 0.0336          | 0.1418          | 0.2262          | 0.0001                 | 0.0014                 |
| PCOD8328689        | 14.22                       | 20.33                                 | 0.49                           | 1.6025                          | 0.0110               | 2.6164                          | 0.0387               | 3.0751                          | 0.0630               | 0.0523          | 0.1672          | 0.1954          | 0.0002                 | 0.0032                 |
| PCOD8312182        | 14.22                       | 20.02                                 | 0.28                           | 1.6059                          | 0.0083               | 2.6222                          | 0.0298               | 3.0556                          | 0.0456               | 0.0337          | 0.1194          | 0.1872          | 0.0001                 | 0.0004                 |
| PCOD8255541        | 14.24                       | 19.38                                 | 0.14                           | 1.6068                          | 0.0109               | 2.6234                          | 0.0392               | 3.0509                          | 0.0583               | 0.0415          | 0.1501          | 0.2177          | 0.0002                 | 0.0002                 |
| PCOD8271001        | 14.25                       | 19.72                                 | 0.10                           | 1.6028                          | 0.0096               | 2.6170                          | 0.0315               | 3.0734                          | 0.0713               | 0.0429          | 0.1292          | 0.2546          | 0.0000                 | 0.0028                 |
| PCOD8292946        | 14.29                       | 20.23                                 | 0.49                           | 1.6052                          | 0.0134               | 2.6208                          | 0.0370               | 3.0595                          | 0.0731               | 0.0539          | 0.1859          | 0.2588          | 0.0002                 | 0.0009                 |
| PCOD8268839        | 14.31                       | 20.01                                 | 0.35                           | 1.6046                          | 0.0094               | 2.6201                          | 0.0288               | 3.0636                          | 0.0655               | 0.0371          | 0.1129          | 0.2259          | 0.0001                 | 0.0021                 |
| PCOD8316520        | 14.32                       | 20.04                                 | 0.39                           | 1.6016                          | 0.0108               | 2.6150                          | 0.0361               | 3.0789                          | 0.0448               | 0.0483          | 0.1939          | 0.1660          | 0.0000                 | 0.0024                 |
| PCOD8256296        | 14.32                       | 19.71                                 | 0.17                           | 1.6064                          | 0.0144               | 2.6229                          | 0.0355               | 3.0524                          | 0.0573               | 0.0543          | 0.1394          | 0.1839          | 0.0000                 | 0.0006                 |

| Structure code     | FD<br>(T nm <sup>-3</sup> ) | $\Delta E$<br>(kJ mol <sup>-1</sup> ) | $\nu$<br>(T nm <sup>-3</sup> ) | $\langle D_{TO} \rangle$<br>(Å) | $\sigma_{TO}$<br>(Å) | $\langle D_{OO} \rangle$<br>(Å) | $\sigma_{OO}$<br>(Å) | $\langle D_{TT} \rangle$<br>(Å) | $\sigma_{TT}$<br>(Å) | $R_{TO}$<br>(Å) | $R_{OO}$<br>(Å) | $R_{TT}$<br>(Å) | $\epsilon_{OO}$<br>(Å) | $\epsilon_{TT}$<br>(Å) |
|--------------------|-----------------------------|---------------------------------------|--------------------------------|---------------------------------|----------------------|---------------------------------|----------------------|---------------------------------|----------------------|-----------------|-----------------|-----------------|------------------------|------------------------|
| PCOD8325449        | 14.32                       | 19.83                                 | 0.24                           | 1.6071                          | 0.0125               | 2.6240                          | 0.0343               | 3.0492                          | 0.0742               | 0.0398          | 0.1386          | 0.2462          | 0.0001                 | 0.0001                 |
| PCOD8319320        | 14.32                       | 20.16                                 | 0.48                           | 1.6050                          | 0.0101               | 2.6208                          | 0.0306               | 3.0610                          | 0.0627               | 0.0451          | 0.1192          | 0.2458          | 0.0001                 | 0.0014                 |
| PCOD8287561        | 14.33                       | 19.90                                 | 0.30                           | 1.6066                          | 0.0133               | 2.6232                          | 0.0339               | 3.0524                          | 0.0550               | 0.0519          | 0.1458          | 0.2220          | 0.0001                 | 0.0005                 |
| PCOD8327295        | 14.33                       | 19.99                                 | 0.37                           | 1.6074                          | 0.0053               | 2.6248                          | 0.0284               | 3.0486                          | 0.0275               | 0.0192          | 0.1012          | 0.0740          | 0.0002                 | 0.0008                 |
| PCOD8266162        | 14.34                       | 19.00                                 | 0.30                           | 1.6036                          | 0.0072               | 2.6185                          | 0.0221               | 3.0688                          | 0.0650               | 0.0313          | 0.1064          | 0.1901          | 0.0001                 | 0.0023                 |
| PCOD8314904        | 14.34                       | 19.65                                 | 0.15                           | 1.6054                          | 0.0098               | 2.6214                          | 0.0307               | 3.0589                          | 0.0641               | 0.0465          | 0.1134          | 0.2686          | 0.0001                 | 0.0013                 |
| PCOD8297297        | 14.37                       | 20.16                                 | 0.52                           | 1.6056                          | 0.0090               | 2.6217                          | 0.0260               | 3.0580                          | 0.0748               | 0.0327          | 0.1027          | 0.2254          | 0.0001                 | 0.0012                 |
| PCOD8275449        | 14.37                       | 19.82                                 | 0.29                           | 1.6051                          | 0.0102               | 2.6207                          | 0.0351               | 3.0610                          | 0.0758               | 0.0381          | 0.1417          | 0.2394          | 0.0000                 | 0.0017                 |
| PCOD8287401        | 14.38                       | 19.43                                 | 0.03                           | 1.6056                          | 0.0125               | 2.6217                          | 0.0304               | 3.0573                          | 0.0585               | 0.0452          | 0.1128          | 0.2278          | 0.0000                 | 0.0005                 |
| PCOD8297441        | 14.39                       | 20.11                                 | 0.51                           | 1.6052                          | 0.0116               | 2.6210                          | 0.0263               | 3.0593                          | 0.0719               | 0.0448          | 0.1214          | 0.2773          | 0.0000                 | 0.0005                 |
| PCOD8307496        | 14.40                       | 18.78                                 | 0.39                           | 1.6041                          | 0.0084               | 2.6192                          | 0.0294               | 3.0661                          | 0.0463               | 0.0282          | 0.0990          | 0.1750          | 0.0000                 | 0.0023                 |
| PCOD8323479        | 14.41                       | 19.31                                 | 0.01                           | 1.6067                          | 0.0063               | 2.6235                          | 0.0273               | 3.0524                          | 0.0457               | 0.0272          | 0.0903          | 0.1984          | 0.0001                 | 0.0009                 |
| PCOD8297785        | 14.45                       | 19.70                                 | 0.28                           | 1.6034                          | 0.0076               | 2.6181                          | 0.0249               | 3.0703                          | 0.0714               | 0.0300          | 0.1066          | 0.1980          | 0.0001                 | 0.0026                 |
| PCOD8288490        | 14.45                       | 19.50                                 | 0.15                           | 1.6050                          | 0.0127               | 2.6204                          | 0.0387               | 3.0604                          | 0.0647               | 0.0545          | 0.1745          | 0.2108          | 0.0002                 | 0.0005                 |
| PCOD8292952        | 14.46                       | 19.53                                 | 0.18                           | 1.6055                          | 0.0122               | 2.6213                          | 0.0338               | 3.0580                          | 0.0667               | 0.0485          | 0.1900          | 0.2348          | 0.0001                 | 0.0006                 |
| PCOD8297501        | 14.46                       | 20.19                                 | 0.64                           | 1.6058                          | 0.0108               | 2.6219                          | 0.0330               | 3.0570                          | 0.0830               | 0.0357          | 0.1391          | 0.2603          | 0.0000                 | 0.0012                 |
| PCOD8323497        | 14.49                       | 20.15                                 | 0.63                           | 1.6020                          | 0.0112               | 2.6156                          | 0.0377               | 3.0775                          | 0.0651               | 0.0471          | 0.1386          | 0.1974          | 0.0001                 | 0.0029                 |
| PCOD8323427        | 14.49                       | 19.38                                 | 0.11                           | 1.6020                          | 0.0100               | 2.6158                          | 0.0288               | 3.0771                          | 0.0621               | 0.0406          | 0.1169          | 0.1984          | 0.0001                 | 0.0025                 |
| PCOD8330370        | 14.50                       | 19.37                                 | 0.11                           | 1.6020                          | 0.0101               | 2.6158                          | 0.0285               | 3.0770                          | 0.0622               | 0.0412          | 0.1157          | 0.2057          | 0.0001                 | 0.0024                 |
| PCOD8329430        | 14.51                       | 18.82                                 | 0.26                           | 1.6042                          | 0.0107               | 2.6193                          | 0.0313               | 3.0645                          | 0.0607               | 0.0360          | 0.1391          | 0.2137          | 0.0000                 | 0.0008                 |
| PCOD8287380        | 14.52                       | 19.61                                 | 0.30                           | 1.6041                          | 0.0119               | 2.6190                          | 0.0375               | 3.0662                          | 0.0788               | 0.0487          | 0.1991          | 0.2581          | 0.0002                 | 0.0020                 |
| PCOD8330339        | 14.53                       | 19.43                                 | 0.18                           | 1.6027                          | 0.0108               | 2.6166                          | 0.0388               | 3.0739                          | 0.0645               | 0.0370          | 0.1479          | 0.1941          | 0.0002                 | 0.0028                 |
| PCOD8265454        | 14.53                       | 19.06                                 | 0.07                           | 1.6033                          | 0.0090               | 2.6179                          | 0.0284               | 3.0695                          | 0.0704               | 0.0361          | 0.1153          | 0.2119          | 0.0000                 | 0.0016                 |
| PCOD8287569        | 14.55                       | 19.39                                 | 0.18                           | 1.6030                          | 0.0099               | 2.6172                          | 0.0366               | 3.0721                          | 0.0610               | 0.0378          | 0.1359          | 0.2547          | 0.0003                 | 0.0028                 |
| PCOD8275130        | 14.56                       | 19.30                                 | 0.12                           | 1.6051                          | 0.0057               | 2.6210                          | 0.0243               | 3.0613                          | 0.0566               | 0.0201          | 0.0876          | 0.1876          | 0.0002                 | 0.0022                 |
| PCOD8329341        | 14.57                       | 19.44                                 | 0.24                           | 1.6053                          | 0.0072               | 2.6212                          | 0.0317               | 3.0601                          | 0.0487               | 0.0240          | 0.1290          | 0.2263          | 0.0000                 | 0.0020                 |
| <u>PCOD8167047</u> | 14.59                       | 19.46                                 | 0.26                           | 1.6034                          | 0.0103               | 2.6176                          | 0.0334               | 3.0714                          | <u>0.1030</u>        | 0.0486          | 0.1665          | <u>0.3951</u>   | 0.0005                 | 0.0041                 |
| PCOD8330289        | 14.59                       | 19.46                                 | 0.26                           | 1.6055                          | 0.0120               | 2.6213                          | 0.0393               | 3.0583                          | 0.0794               | 0.0436          | 0.1996          | 0.2701          | 0.0002                 | 0.0013                 |
| PCOD8193855        | 14.60                       | 19.63                                 | 0.39                           | 1.6043                          | 0.0076               | 2.6195                          | 0.0286               | 3.0655                          | 0.0583               | 0.0310          | 0.1110          | 0.2142          | 0.0000                 | 0.0022                 |
| PCOD8258256        | 14.60                       | 19.60                                 | 0.37                           | 1.6042                          | 0.0069               | 2.6196                          | 0.0206               | 3.0657                          | 0.0582               | 0.0349          | 0.0773          | 0.1765          | 0.0002                 | 0.0023                 |
| PCOD8314357        | 14.60                       | 18.69                                 | 0.25                           | 1.6035                          | 0.0099               | 2.6182                          | 0.0345               | 3.0684                          | 0.0522               | 0.0420          | 0.1489          | 0.1643          | 0.0000                 | 0.0013                 |

| Structure code     | FD<br>(T nm <sup>-3</sup> ) | $\Delta E$<br>(kJ mol <sup>-1</sup> ) | $\nu$<br>(T nm <sup>-3</sup> ) | $\langle D_{TO} \rangle$<br>(Å) | $\sigma_{TO}$<br>(Å) | $\langle D_{OO} \rangle$<br>(Å) | $\sigma_{OO}$<br>(Å) | $\langle D_{TT} \rangle$<br>(Å) | $\sigma_{TT}$<br>(Å) | $R_{TO}$<br>(Å) | $R_{OO}$<br>(Å) | $R_{TT}$<br>(Å) | $\epsilon_{OO}$<br>(Å) | $\epsilon_{TT}$<br>(Å) |
|--------------------|-----------------------------|---------------------------------------|--------------------------------|---------------------------------|----------------------|---------------------------------|----------------------|---------------------------------|----------------------|-----------------|-----------------|-----------------|------------------------|------------------------|
| <b>PCOD8327944</b> | 14.63                       | 19.80                                 | 0.54                           | 1.6060                          | 0.0098               | 2.6223                          | 0.0340               | 3.0551                          | 0.0653               | 0.0339          | 0.1274          | 0.2002          | 0.0000                 | 0.0004                 |
| <b>PCOD8292750</b> | 14.65                       | 19.14                                 | 0.11                           | 1.6041                          | 0.0056               | 2.6193                          | 0.0232               | 3.0668                          | 0.0585               | 0.0228          | 0.0815          | 0.1886          | 0.0001                 | 0.0026                 |
| <b>PCOD8084708</b> | 14.66                       | 19.03                                 | 0.04                           | 1.6044                          | 0.0087               | 2.6195                          | 0.0319               | 3.0640                          | 0.0613               | 0.0367          | 0.1479          | 0.2000          | 0.0001                 | 0.0014                 |
| <b>PCOD8315717</b> | 14.66                       | 19.22                                 | 0.17                           | 1.6057                          | 0.0106               | 2.6218                          | 0.0277               | 3.0566                          | 0.0648               | 0.0571          | 0.1257          | 0.2256          | 0.0001                 | 0.0002                 |
| <b>PCOD8277571</b> | 14.66                       | 19.50                                 | 0.36                           | 1.6059                          | 0.0114               | 2.6220                          | 0.0326               | 3.0562                          | 0.0819               | 0.0487          | 0.1666          | 0.2911          | 0.0000                 | 0.0008                 |
| <b>PCOD8288185</b> | 14.66                       | 18.91                                 | 0.04                           | 1.6063                          | 0.0117               | 2.6227                          | 0.0312               | 3.0536                          | 0.0668               | 0.0416          | 0.1390          | 0.2310          | 0.0000                 | 0.0002                 |
| <b>PCOD8322647</b> | 14.69                       | 18.70                                 | 0.15                           | 1.6061                          | 0.0101               | 2.6226                          | 0.0282               | 3.0551                          | 0.0471               | 0.0462          | 0.1096          | 0.2031          | 0.0001                 | 0.0010                 |
| <b>PCOD8255673</b> | 14.70                       | 19.09                                 | 0.12                           | 1.6024                          | 0.0103               | 2.6165                          | 0.0282               | 3.0743                          | 0.0655               | 0.0414          | 0.0965          | 0.1969          | 0.0001                 | 0.0019                 |
| <b>PCOD8177390</b> | 14.72                       | 19.31                                 | 0.29                           | 1.6038                          | 0.0110               | 2.6187                          | 0.0341               | 3.0676                          | 0.0679               | 0.0476          | 0.1464          | 0.2624          | 0.0000                 | 0.0021                 |
| <b>PCOD8275859</b> | 14.74                       | 19.10                                 | 0.17                           | 1.6053                          | 0.0111               | 2.6211                          | 0.0309               | 3.0591                          | 0.0805               | 0.0469          | 0.1581          | 0.2726          | 0.0000                 | 0.0007                 |
| <b>PCOD8250146</b> | 14.74                       | 19.02                                 | 0.11                           | 1.6038                          | 0.0109               | 2.6186                          | 0.0348               | 3.0678                          | 0.0659               | 0.0462          | 0.1461          | 0.2482          | 0.0000                 | 0.0021                 |
| <b>PCOD8182441</b> | 14.76                       | 19.42                                 | 0.40                           | 1.6040                          | 0.0108               | 2.6189                          | 0.0355               | 3.0669                          | 0.0696               | 0.0441          | 0.1501          | 0.2531          | 0.0001                 | 0.0021                 |
| <b>PCOD8194789</b> | 14.77                       | 19.06                                 | 0.17                           | 1.6025                          | 0.0111               | 2.6166                          | 0.0316               | 3.0737                          | 0.0684               | 0.0443          | 0.1151          | 0.2391          | 0.0000                 | 0.0017                 |
| <b>PCOD8321687</b> | 14.77                       | 19.09                                 | 0.20                           | 1.6052                          | 0.0075               | 2.6211                          | 0.0342               | 3.0602                          | 0.0408               | 0.0232          | 0.1353          | 0.1584          | 0.0000                 | 0.0017                 |
| <b>PCOD8177901</b> | 14.78                       | 19.08                                 | 0.19                           | 1.6034                          | 0.0075               | 2.6181                          | 0.0281               | 3.0701                          | 0.0544               | 0.0315          | 0.1106          | 0.2281          | 0.0000                 | 0.0027                 |
| <b>PCOD8323210</b> | 14.79                       | 19.30                                 | 0.36                           | 1.6053                          | 0.0079               | 2.6211                          | 0.0332               | 3.0599                          | 0.0427               | 0.0295          | 0.1203          | 0.1837          | 0.0001                 | 0.0016                 |
| <b>PCOD8195078</b> | 14.80                       | 18.88                                 | 0.07                           | 1.6036                          | 0.0074               | 2.6185                          | 0.0263               | 3.0687                          | 0.0509               | 0.0327          | 0.0943          | 0.2254          | 0.0001                 | 0.0024                 |
| <b>PCOD8275951</b> | 14.80                       | 19.28                                 | 0.35                           | 1.6057                          | 0.0105               | 2.6215                          | 0.0393               | 3.0561                          | 0.0732               | 0.0396          | 0.1709          | 0.2702          | 0.0002                 | 0.0003                 |
| <b>PCOD8195292</b> | 14.80                       | 19.24                                 | 0.33                           | 1.6034                          | 0.0120               | 2.6180                          | 0.0270               | 3.0686                          | 0.0706               | 0.0435          | 0.1035          | 0.2473          | 0.0000                 | 0.0009                 |
| <b>PCOD8267707</b> | 14.81                       | 19.07                                 | 0.21                           | 1.6041                          | 0.0113               | 2.6191                          | 0.0358               | 3.0653                          | 0.0791               | 0.0467          | 0.1505          | 0.2595          | 0.0001                 | 0.0014                 |
| <b>PCOD8239101</b> | 14.81                       | 18.76                                 | 0.00                           | 1.6055                          | 0.0082               | 2.6217                          | 0.0216               | 3.0578                          | 0.0567               | 0.0292          | 0.0914          | 0.1927          | 0.0002                 | 0.0007                 |
| <b>PCOD8324829</b> | 14.82                       | 18.80                                 | 0.04                           | 1.6063                          | 0.0093               | 2.6228                          | 0.0290               | 3.0545                          | 0.0454               | 0.0404          | 0.1091          | 0.2087          | 0.0001                 | 0.0010                 |
| <b>PCOD8287405</b> | 14.82                       | 19.51                                 | 0.53                           | 1.6057                          | 0.0103               | 2.6218                          | 0.0309               | 3.0572                          | 0.0765               | 0.0460          | 0.1890          | 0.2409          | 0.0000                 | 0.0010                 |
| <b>PCOD8270297</b> | 14.84                       | 19.05                                 | 0.23                           | 1.6031                          | 0.0095               | 2.6176                          | 0.0250               | 3.0706                          | 0.0729               | 0.0455          | 0.1400          | 0.2665          | 0.0001                 | 0.0015                 |
| <b>PCOD8297791</b> | 14.84                       | 19.02                                 | 0.21                           | 1.6066                          | 0.0114               | 2.6231                          | 0.0357               | 3.0511                          | 0.0688               | 0.0458          | 0.1671          | 0.2348          | 0.0002                 | 0.0006                 |
| <b>PCOD8327297</b> | 14.84                       | 19.11                                 | 0.28                           | 1.6064                          | 0.0075               | 2.6231                          | 0.0278               | 3.0540                          | 0.0484               | 0.0364          | 0.0917          | 0.1725          | 0.0001                 | 0.0013                 |
| <b>PCOD8201211</b> | 14.84                       | 19.25                                 | 0.38                           | 1.6049                          | 0.0069               | 2.6206                          | 0.0303               | 3.0620                          | 0.0519               | 0.0307          | 0.1071          | 0.1965          | 0.0000                 | 0.0019                 |
| <b>PCOD8323974</b> | 14.85                       | 18.97                                 | 0.18                           | 1.6064                          | 0.0076               | 2.6230                          | 0.0280               | 3.0540                          | 0.0489               | 0.0372          | 0.0925          | 0.1715          | 0.0001                 | 0.0012                 |
| <b>PCOD8059487</b> | 14.85                       | 19.48                                 | 0.54                           | 1.6035                          | 0.0070               | 2.6182                          | 0.0241               | 3.0695                          | 0.0631               | 0.0312          | 0.0972          | 0.2066          | 0.0000                 | 0.0024                 |
| <b>PCOD8288184</b> | 14.86                       | 18.82                                 | 0.09                           | 1.6055                          | 0.0088               | 2.6215                          | 0.0252               | 3.0581                          | 0.0626               | 0.0477          | 0.1093          | 0.2095          | 0.0000                 | 0.0009                 |
| <b>PCOD8255854</b> | 14.86                       | 19.38                                 | 0.48                           | 1.6066                          | 0.0118               | 2.6233                          | 0.0342               | 3.0519                          | 0.0751               | 0.0449          | 0.2003          | 0.2419          | 0.0001                 | 0.0003                 |

| Structure code | FD<br>(T nm <sup>-3</sup> ) | $\Delta E$<br>(kJ mol <sup>-1</sup> ) | $\nu$<br>(T nm <sup>-3</sup> ) | $\langle D_{TO} \rangle$<br>(Å) | $\sigma_{TO}$<br>(Å) | $\langle D_{OO} \rangle$<br>(Å) | $\sigma_{OO}$<br>(Å) | $\langle D_{TT} \rangle$<br>(Å) | $\sigma_{TT}$<br>(Å) | $R_{TO}$<br>(Å) | $R_{OO}$<br>(Å) | $R_{TT}$<br>(Å) | $\epsilon_{OO}$<br>(Å) | $\epsilon_{TT}$<br>(Å) |
|----------------|-----------------------------|---------------------------------------|--------------------------------|---------------------------------|----------------------|---------------------------------|----------------------|---------------------------------|----------------------|-----------------|-----------------|-----------------|------------------------|------------------------|
| PCOD8078966    | 14.91                       | 18.17                                 | 0.30                           | 1.6061                          | 0.0114               | 2.6219                          | 0.0440               | 3.0539                          | 0.0574               | 0.0539          | 0.1700          | 0.1910          | 0.0005                 | 0.0005                 |
| PCOD8188014    | 14.91                       | 19.01                                 | 0.28                           | 1.6028                          | 0.0101               | 2.6171                          | 0.0269               | 3.0725                          | 0.0660               | 0.0403          | 0.1121          | 0.2324          | 0.0001                 | 0.0020                 |
| PCOD8316462    | 14.91                       | 18.53                                 | 0.05                           | 1.6070                          | 0.0082               | 2.6239                          | 0.0300               | 3.0493                          | 0.0588               | 0.0385          | 0.1231          | 0.2227          | 0.0000                 | 0.0007                 |
| PCOD8268335    | 14.92                       | 18.93                                 | 0.23                           | 1.6042                          | 0.0110               | 2.6192                          | 0.0363               | 3.0649                          | 0.0773               | 0.0441          | 0.1411          | 0.2415          | 0.0001                 | 0.0011                 |
| PCOD8206296    | 14.93                       | 19.05                                 | 0.32                           | 1.6030                          | 0.0099               | 2.6174                          | 0.0265               | 3.0715                          | 0.0664               | 0.0372          | 0.1164          | 0.2322          | 0.0001                 | 0.0019                 |
| PCOD8174197    | 14.95                       | 18.55                                 | 0.00                           | 1.6013                          | 0.0083               | 2.6146                          | 0.0221               | 3.0807                          | 0.0672               | 0.0311          | 0.1127          | 0.1838          | 0.0000                 | 0.0027                 |
| PCOD8318888    | 14.95                       | 18.54                                 | 0.01                           | 1.6041                          | 0.0101               | 2.6193                          | 0.0271               | 3.0654                          | 0.0591               | 0.0440          | 0.1528          | 0.1867          | 0.0000                 | 0.0015                 |
| PCOD8313047    | 14.97                       | 18.91                                 | 0.27                           | 1.6070                          | 0.0050               | 2.6241                          | 0.0241               | 3.0511                          | 0.0317               | 0.0237          | 0.1091          | 0.0992          | 0.0001                 | 0.0012                 |
| PCOD8288548    | 14.98                       | 19.04                                 | 0.37                           | 1.6042                          | 0.0124               | 2.6193                          | 0.0369               | 3.0638                          | 0.0736               | 0.0573          | 0.1840          | 0.2452          | 0.0001                 | 0.0005                 |
| PCOD8292983    | 14.98                       | 18.58                                 | 0.05                           | 1.6059                          | 0.0111               | 2.6221                          | 0.0311               | 3.0549                          | 0.0711               | 0.0438          | 0.1788          | 0.2330          | 0.0000                 | 0.0002                 |
| PCOD8250245    | 15.03                       | 18.74                                 | 0.21                           | 1.6036                          | 0.0112               | 2.6183                          | 0.0363               | 3.0678                          | 0.0665               | 0.0454          | 0.1411          | 0.2267          | 0.0001                 | 0.0015                 |
| PCOD8265597    | 15.04                       | 18.54                                 | 0.09                           | 1.6040                          | 0.0105               | 2.6191                          | 0.0283               | 3.0657                          | 0.0631               | 0.0503          | 0.1540          | 0.2318          | 0.0001                 | 0.0013                 |
| PCOD8250160    | 15.06                       | 18.66                                 | 0.19                           | 1.6044                          | 0.0096               | 2.6197                          | 0.0344               | 3.0637                          | 0.0674               | 0.0386          | 0.1380          | 0.2350          | 0.0000                 | 0.0012                 |
| PCOD8188016    | 15.06                       | 18.78                                 | 0.27                           | 1.6044                          | 0.0097               | 2.6196                          | 0.0343               | 3.0638                          | 0.0683               | 0.0386          | 0.1383          | 0.2352          | 0.0000                 | 0.0012                 |
| PCOD8224441    | 15.07                       | 18.33                                 | 0.03                           | 1.6032                          | 0.0083               | 2.6176                          | 0.0317               | 3.0708                          | 0.0616               | 0.0312          | 0.1336          | 0.1963          | 0.0000                 | 0.0022                 |
| PCOD8206321    | 15.08                       | 18.29                                 | 0.05                           | 1.6037                          | 0.0093               | 2.6185                          | 0.0349               | 3.0674                          | 0.0673               | 0.0388          | 0.1430          | 0.2424          | 0.0001                 | 0.0015                 |
| PCOD8323436    | 15.08                       | 18.41                                 | 0.04                           | 1.6052                          | 0.0065               | 2.6209                          | 0.0342               | 3.0602                          | 0.0487               | 0.0247          | 0.1318          | 0.1794          | 0.0000                 | 0.0014                 |
| PCOD8330439    | 15.09                       | 18.59                                 | 0.17                           | 1.6016                          | 0.0086               | 2.6152                          | 0.0263               | 3.0788                          | 0.0480               | 0.0331          | 0.0840          | 0.1654          | 0.0001                 | 0.0023                 |
| PCOD8188445    | 15.10                       | 18.45                                 | 0.09                           | 1.6021                          | 0.0100               | 2.6160                          | 0.0271               | 3.0758                          | 0.0601               | 0.0370          | 0.0973          | 0.2135          | 0.0000                 | 0.0021                 |
| PCOD8194773    | 15.10                       | 18.41                                 | 0.06                           | 1.6022                          | 0.0098               | 2.6161                          | 0.0271               | 3.0755                          | 0.0564               | 0.0407          | 0.1022          | 0.2298          | 0.0000                 | 0.0021                 |
| PCOD8246232    | 15.11                       | 18.58                                 | 0.18                           | 1.6047                          | 0.0068               | 2.6201                          | 0.0309               | 3.0631                          | 0.0445               | 0.0301          | 0.1186          | 0.2015          | 0.0000                 | 0.0019                 |
| PCOD8068543    | 15.11                       | 18.65                                 | 0.23                           | 1.6038                          | 0.0096               | 2.6188                          | 0.0310               | 3.0675                          | 0.0639               | 0.0418          | 0.1159          | 0.2457          | 0.0001                 | 0.0021                 |
| PCOD8268342    | 15.11                       | 18.24                                 | 0.05                           | 1.6048                          | 0.0109               | 2.6202                          | 0.0335               | 3.0611                          | 0.0778               | 0.0435          | 0.1563          | 0.2748          | 0.0001                 | 0.0002                 |
| PCOD8235824    | 15.11                       | 18.63                                 | 0.22                           | 1.6034                          | 0.0105               | 2.6180                          | 0.0313               | 3.0689                          | 0.0653               | 0.0406          | 0.1463          | 0.2403          | 0.0000                 | 0.0013                 |
| PCOD8188450    | 15.11                       | 18.65                                 | 0.23                           | 1.6035                          | 0.0105               | 2.6181                          | 0.0315               | 3.0685                          | 0.0654               | 0.0407          | 0.1501          | 0.2434          | 0.0000                 | 0.0013                 |
| PCOD8298585    | 15.12                       | 18.19                                 | 0.08                           | 1.6043                          | 0.0112               | 2.6195                          | 0.0345               | 3.0634                          | 0.0764               | 0.0452          | 0.1569          | 0.2687          | 0.0001                 | 0.0004                 |
| PCOD8321589    | 15.18                       | 18.56                                 | 0.24                           | 1.6014                          | 0.0098               | 2.6148                          | 0.0331               | 3.0794                          | 0.0647               | 0.0312          | 0.1186          | 0.2024          | 0.0001                 | 0.0019                 |
| PCOD8267763    | 15.19                       | 18.21                                 | 0.01                           | 1.6047                          | 0.0107               | 2.6200                          | 0.0335               | 3.0616                          | 0.0778               | 0.0407          | 0.1538          | 0.2660          | 0.0001                 | 0.0002                 |
| PCOD8298581    | 15.21                       | 18.17                                 | 0.00                           | 1.6045                          | 0.0113               | 2.6197                          | 0.0341               | 3.0626                          | 0.0764               | 0.0423          | 0.1542          | 0.2686          | 0.0001                 | 0.0003                 |
| PCOD8265036    | 15.22                       | 18.30                                 | 0.10                           | 1.6034                          | 0.0070               | 2.6180                          | 0.0312               | 3.0702                          | 0.0424               | 0.0232          | 0.1274          | 0.1834          | 0.0000                 | 0.0026                 |
| PCOD8287551    | 15.22                       | 18.45                                 | 0.20                           | 1.6034                          | 0.0074               | 2.6182                          | 0.0237               | 3.0695                          | 0.0632               | 0.0302          | 0.1059          | 0.1853          | 0.0001                 | 0.0020                 |



| Structure code            | FD<br>(T nm <sup>-3</sup> ) | $\Delta E$<br>(kJ mol <sup>-1</sup> ) | $\nu$<br>(T nm <sup>-3</sup> ) | $\langle D_{TO} \rangle$<br>(Å) | $\sigma_{TO}$<br>(Å) | $\langle D_{OO} \rangle$<br>(Å) | $\sigma_{OO}$<br>(Å) | $\langle D_{TT} \rangle$<br>(Å) | $\sigma_{TT}$<br>(Å) | $R_{TO}$<br>(Å) | $R_{OO}$<br>(Å) | $R_{TT}$<br>(Å) | $\epsilon_{OO}$<br>(Å) | $\epsilon_{TT}$<br>(Å) |
|---------------------------|-----------------------------|---------------------------------------|--------------------------------|---------------------------------|----------------------|---------------------------------|----------------------|---------------------------------|----------------------|-----------------|-----------------|-----------------|------------------------|------------------------|
| <b>PCOD8194038</b>        | 15.24                       | 18.34                                 | 0.14                           | 1.6027                          | 0.0100               | 2.6169                          | 0.0333               | 3.0726                          | 0.0577               | 0.0363          | 0.1229          | 0.1841          | 0.0001                 | 0.0018                 |
| <b>PCOD8084804</b>        | 15.24                       | 18.30                                 | 0.12                           | 1.6035                          | 0.0112               | 2.6181                          | 0.0340               | 3.0681                          | 0.0647               | 0.0523          | 0.1892          | 0.2523          | 0.0001                 | 0.0011                 |
| <b>PCOD8287407</b>        | 15.24                       | 18.31                                 | 0.13                           | 1.6047                          | 0.0113               | 2.6201                          | 0.0375               | 3.0617                          | 0.0791               | 0.0503          | 0.2089          | 0.2660          | 0.0002                 | 0.0007                 |
| <b>PCOD8191654</b>        | 15.25                       | 18.28                                 | 0.11                           | 1.6030                          | 0.0101               | 2.6173                          | 0.0324               | 3.0711                          | 0.0660               | 0.0438          | 0.1502          | 0.2306          | 0.0000                 | 0.0014                 |
| <b>PCOD8191655</b>        | 15.26                       | 18.29                                 | 0.13                           | 1.6032                          | 0.0102               | 2.6176                          | 0.0331               | 3.0700                          | 0.0659               | 0.0442          | 0.1649          | 0.2383          | 0.0000                 | 0.0013                 |
| <b>PCOD8275488</b>        | 15.26                       | 18.14                                 | 0.04                           | 1.6063                          | 0.0072               | 2.6225                          | 0.0317               | 3.0537                          | 0.0590               | 0.0380          | 0.1712          | 0.2547          | 0.0003                 | 0.0004                 |
| <b>PCOD8202737</b>        | 15.26                       | 18.37                                 | 0.19                           | 1.6032                          | 0.0098               | 2.6177                          | 0.0322               | 3.0700                          | 0.0668               | 0.0446          | 0.1516          | 0.2350          | 0.0000                 | 0.0013                 |
| <b>PCOD8224778</b>        | 15.28                       | 18.25                                 | 0.12                           | 1.6031                          | 0.0098               | 2.6176                          | 0.0320               | 3.0701                          | 0.0658               | 0.0431          | 0.1611          | 0.2369          | 0.0000                 | 0.0013                 |
| <b>PCOD8207674</b>        | 15.30                       | 17.79                                 | 0.17                           | 1.6024                          | 0.0110               | 2.6163                          | 0.0334               | 3.0738                          | 0.0709               | 0.0445          | 0.1377          | 0.2324          | 0.0000                 | 0.0013                 |
| <b>PCOD8323005</b>        | 15.31                       | 18.18                                 | 0.10                           | 1.6063                          | 0.0109               | 2.6225                          | 0.0346               | 3.0539                          | 0.0748               | 0.0510          | 0.2114          | 0.2574          | 0.0002                 | 0.0004                 |
| <b>PCOD8235822</b>        | 15.32                       | 18.53                                 | 0.36                           | 1.6040                          | 0.0104               | 2.6190                          | 0.0322               | 3.0655                          | 0.0686               | 0.0456          | 0.1635          | 0.2615          | 0.0000                 | 0.0011                 |
| <b>PCOD8327501</b>        | 15.35                       | 18.23                                 | 0.18                           | 1.6047                          | 0.0070               | 2.6202                          | 0.0263               | 3.0624                          | 0.0495               | 0.0276          | 0.1014          | 0.2073          | 0.0001                 | 0.0012                 |
| <b>PCOD8057587</b>        | 15.35                       | 18.33                                 | 0.25                           | 1.6041                          | 0.0068               | 2.6191                          | 0.0349               | 3.0664                          | 0.0457               | 0.0295          | 0.1400          | 0.2029          | 0.0001                 | 0.0023                 |
| <b>PCOD8207815</b>        | 15.35                       | 18.16                                 | 0.14                           | 1.6025                          | 0.0081               | 2.6166                          | 0.0256               | 3.0740                          | 0.0678               | 0.0388          | 0.1476          | 0.2033          | 0.0000                 | 0.0020                 |
| <b>PCOD8057582</b>        | 15.36                       | 18.68                                 | 0.50                           | 1.6044                          | 0.0098               | 2.6197                          | 0.0327               | 3.0633                          | 0.0679               | 0.0400          | 0.1491          | 0.2307          | 0.0000                 | 0.0009                 |
| <b>PCOD8270296</b>        | 15.38                       | 18.23                                 | 0.22                           | 1.6030                          | 0.0099               | 2.6174                          | 0.0241               | 3.0704                          | 0.0705               | 0.0445          | 0.1335          | 0.2526          | 0.0001                 | 0.0008                 |
| <b>PCOD8172547</b>        | 15.39                       | 18.51                                 | 0.41                           | 1.6041                          | 0.0107               | 2.6192                          | 0.0266               | 3.0649                          | 0.0594               | 0.0302          | 0.0898          | 0.1968          | 0.0001                 | 0.0008                 |
| <b>PCOD8246794</b>        | 15.39                       | 18.31                                 | 0.28                           | 1.6068                          | 0.0084               | 2.6235                          | 0.0333               | 3.0506                          | 0.0774               | 0.0298          | 0.1511          | 0.2451          | 0.0001                 | 0.0002                 |
| <b>PCOD8239268</b>        | 15.40                       | 18.35                                 | 0.32                           | 1.6028                          | 0.0095               | 2.6170                          | 0.0292               | 3.0724                          | 0.0503               | 0.0401          | 0.1277          | 0.2191          | 0.0000                 | 0.0018                 |
| <b>PCOD8068618</b>        | 15.42                       | 18.22                                 | 0.25                           | 1.6040                          | 0.0083               | 2.6190                          | 0.0316               | 3.0661                          | 0.0641               | 0.0392          | 0.1314          | 0.2282          | 0.0000                 | 0.0014                 |
| <b>PCOD8287233</b>        | 15.43                       | 17.88                                 | 0.02                           | 1.6047                          | 0.0108               | 2.6203                          | 0.0323               | 3.0615                          | 0.0618               | 0.0451          | 0.1495          | 0.2101          | 0.0000                 | 0.0006                 |
| <b>PCOD8293075</b>        | 15.46                       | 17.81                                 | 0.01                           | 1.6049                          | 0.0095               | 2.6200                          | 0.0342               | 3.0608                          | 0.0699               | 0.0507          | 0.1536          | 0.2760          | 0.0004                 | 0.0004                 |
| <b>PCOD8275312</b>        | 15.46                       | 18.05                                 | 0.17                           | 1.6051                          | 0.0076               | 2.6207                          | 0.0353               | 3.0618                          | 0.0624               | 0.0282          | 0.1381          | 0.2409          | 0.0002                 | 0.0029                 |
| <b>PCOD8069999</b>        | 15.47                       | 18.18                                 | 0.26                           | 1.6048                          | 0.0084               | 2.6204                          | 0.0289               | 3.0615                          | 0.0648               | 0.0382          | 0.1246          | 0.2230          | 0.0001                 | 0.0011                 |
| <b>PCOD8298395</b>        | 15.47                       | 17.68                                 | 0.08                           | 1.6044                          | 0.0106               | 2.6196                          | 0.0322               | 3.0627                          | 0.0789               | 0.0405          | 0.1569          | 0.2657          | 0.0001                 | 0.0002                 |
| <b><u>PCOD8202721</u></b> | 15.48                       | 18.44                                 | 0.45                           | 1.6029                          | 0.0125               | 2.6171                          | 0.0356               | 3.0711                          | 0.0713               | <u>0.0676</u>   | 0.1819          | 0.2450          | 0.0001                 | 0.0010                 |
| <b>PCOD8069998</b>        | 15.48                       | 18.27                                 | 0.34                           | 1.6049                          | 0.0083               | 2.6206                          | 0.0287               | 3.0610                          | 0.0652               | 0.0348          | 0.1169          | 0.2288          | 0.0001                 | 0.0010                 |
| <b>PCOD8292231</b>        | 15.48                       | 18.00                                 | 0.15                           | 1.6043                          | 0.0084               | 2.6195                          | 0.0288               | 3.0645                          | 0.0413               | 0.0302          | 0.1203          | 0.1857          | 0.0000                 | 0.0014                 |
| <b><u>PCOD8191641</u></b> | 15.48                       | 18.41                                 | 0.44                           | 1.6030                          | 0.0122               | 2.6173                          | 0.0358               | 3.0705                          | 0.0713               | <u>0.0685</u>   | 0.1903          | 0.2502          | 0.0001                 | 0.0010                 |
| <b>PCOD8164664</b>        | 15.51                       | 17.95                                 | 0.15                           | 1.6036                          | 0.0113               | 2.6185                          | 0.0260               | 3.0669                          | 0.0625               | 0.0366          | 0.1185          | 0.2018          | 0.0001                 | 0.0005                 |
| <b>PCOD8265788</b>        | 15.53                       | 17.65                                 | 0.03                           | 1.6027                          | 0.0104               | 2.6168                          | 0.0367               | 3.0716                          | 0.0488               | 0.0369          | 0.1835          | 0.1716          | 0.0001                 | 0.0007                 |

| Structure code | FD<br>(T nm <sup>-3</sup> ) | $\Delta E$<br>(kJ mol <sup>-1</sup> ) | $\nu$<br>(T nm <sup>-3</sup> ) | $\langle D_{TO} \rangle$<br>(Å) | $\sigma_{TO}$<br>(Å) | $\langle D_{OO} \rangle$<br>(Å) | $\sigma_{OO}$<br>(Å) | $\langle D_{TT} \rangle$<br>(Å) | $\sigma_{TT}$<br>(Å) | $R_{TO}$<br>(Å) | $R_{OO}$<br>(Å) | $R_{TT}$<br>(Å) | $\epsilon_{OO}$<br>(Å) | $\epsilon_{TT}$<br>(Å) |
|----------------|-----------------------------|---------------------------------------|--------------------------------|---------------------------------|----------------------|---------------------------------|----------------------|---------------------------------|----------------------|-----------------|-----------------|-----------------|------------------------|------------------------|
| PCOD8070119    | 15.53                       | 17.89                                 | 0.13                           | 1.6041                          | 0.0083               | 2.6192                          | 0.0305               | 3.0656                          | 0.0665               | 0.0409          | 0.1352          | 0.2483          | 0.0000                 | 0.0015                 |
| PCOD8329212    | 15.54                       | 17.84                                 | 0.10                           | 1.6034                          | 0.0092               | 2.6179                          | 0.0308               | 3.0688                          | 0.0568               | 0.0469          | 0.1302          | 0.2423          | 0.0000                 | 0.0010                 |
| PCOD8266005    | 15.54                       | 17.59                                 | 0.06                           | 1.6027                          | 0.0082               | 2.6169                          | 0.0226               | 3.0729                          | 0.0582               | 0.0304          | 0.0938          | 0.2095          | 0.0000                 | 0.0020                 |
| PCOD8194995    | 15.54                       | 17.89                                 | 0.14                           | 1.6033                          | 0.0106               | 2.6180                          | 0.0261               | 3.0679                          | 0.0684               | 0.0423          | 0.1196          | 0.2516          | 0.0001                 | 0.0001                 |
| PCOD8266251    | 15.55                       | 17.92                                 | 0.17                           | 1.6021                          | 0.0121               | 2.6157                          | 0.0386               | 3.0760                          | 0.0733               | 0.0550          | 0.1773          | 0.2506          | 0.0002                 | 0.0022                 |
| PCOD8250254    | 15.55                       | 17.79                                 | 0.09                           | 1.6034                          | 0.0078               | 2.6178                          | 0.0370               | 3.0690                          | 0.0543               | 0.0331          | 0.1537          | 0.1954          | 0.0003                 | 0.0016                 |
| PCOD8068380    | 15.56                       | 18.02                                 | 0.25                           | 1.6055                          | 0.0086               | 2.6215                          | 0.0267               | 3.0584                          | 0.0466               | 0.0382          | 0.0967          | 0.1742          | 0.0001                 | 0.0010                 |
| PCOD8323814    | 15.57                       | 17.66                                 | 0.01                           | 1.6028                          | 0.0064               | 2.6170                          | 0.0370               | 3.0716                          | 0.0781               | 0.0304          | 0.1826          | 0.2430          | 0.0001                 | 0.0011                 |
| PCOD8206142    | 15.57                       | 18.03                                 | 0.26                           | 1.6036                          | 0.0094               | 2.6182                          | 0.0349               | 3.0684                          | 0.0514               | 0.0434          | 0.1363          | 0.1859          | 0.0001                 | 0.0018                 |
| PCOD8266271    | 15.59                       | 17.92                                 | 0.21                           | 1.6030                          | 0.0081               | 2.6174                          | 0.0266               | 3.0715                          | 0.0571               | 0.0311          | 0.1103          | 0.1823          | 0.0001                 | 0.0019                 |
| PCOD8206791    | 15.60                       | 17.52                                 | 0.05                           | 1.6043                          | 0.0089               | 2.6196                          | 0.0278               | 3.0645                          | 0.0448               | 0.0409          | 0.1205          | 0.1364          | 0.0000                 | 0.0015                 |
| PCOD8230635    | 15.61                       | 17.71                                 | 0.09                           | 1.6014                          | 0.0109               | 2.6149                          | 0.0269               | 3.0789                          | 0.0614               | 0.0335          | 0.1298          | 0.1936          | 0.0001                 | 0.0016                 |
| PCOD8289850    | 15.62                       | 17.55                                 | 0.02                           | 1.6042                          | 0.0111               | 2.6192                          | 0.0348               | 3.0636                          | 0.0661               | 0.0456          | 0.1550          | 0.2476          | 0.0001                 | 0.0000                 |
| PCOD8057712    | 15.64                       | 17.70                                 | 0.11                           | 1.6037                          | 0.0061               | 2.6185                          | 0.0236               | 3.0681                          | 0.0483               | 0.0234          | 0.0963          | 0.1916          | 0.0001                 | 0.0019                 |
| PCOD8267340    | 15.65                       | 17.58                                 | 0.03                           | 1.6029                          | 0.0078               | 2.6171                          | 0.0334               | 3.0722                          | 0.0468               | 0.0281          | 0.1327          | 0.1720          | 0.0001                 | 0.0023                 |
| PCOD8298578    | 15.65                       | 17.52                                 | 0.01                           | 1.6018                          | 0.0092               | 2.6153                          | 0.0432               | 3.0764                          | 0.0485               | 0.0380          | 0.2015          | 0.1695          | 0.0002                 | 0.0012                 |
| PCOD8207623    | 15.67                       | 17.48                                 | 0.01                           | 1.6039                          | 0.0094               | 2.6190                          | 0.0265               | 3.0657                          | 0.0514               | 0.0324          | 0.1221          | 0.1931          | 0.0001                 | 0.0007                 |
| PCOD8196746    | 15.68                       | 17.82                                 | 0.23                           | 1.6024                          | 0.0068               | 2.6165                          | 0.0219               | 3.0748                          | 0.0619               | 0.0214          | 0.0989          | 0.1753          | 0.0001                 | 0.0023                 |
| PCOD8230113    | 15.69                       | 17.51                                 | 0.03                           | 1.6016                          | 0.0093               | 2.6152                          | 0.0276               | 3.0782                          | 0.0595               | 0.0338          | 0.1461          | 0.1877          | 0.0001                 | 0.0019                 |
| PCOD8286942    | 15.71                       | 17.60                                 | 0.11                           | 1.6017                          | 0.0083               | 2.6154                          | 0.0233               | 3.0778                          | 0.0613               | 0.0355          | 0.0896          | 0.1855          | 0.0000                 | 0.0021                 |
| PCOD8295265    | 15.71                       | 17.07                                 | 0.25                           | 1.6055                          | 0.0088               | 2.6215                          | 0.0267               | 3.0567                          | 0.0661               | 0.0342          | 0.1400          | 0.2071          | 0.0000                 | 0.0006                 |
| PCOD8323528    | 15.71                       | 17.44                                 | 0.00                           | 1.6072                          | 0.0060               | 2.6243                          | 0.0284               | 3.0492                          | 0.0364               | 0.0255          | 0.0899          | 0.1039          | 0.0001                 | 0.0002                 |
| PCOD8255844    | 15.71                       | 17.61                                 | 0.12                           | 1.6052                          | 0.0091               | 2.6208                          | 0.0392               | 3.0591                          | 0.0469               | 0.0324          | 0.1590          | 0.1972          | 0.0001                 | 0.0003                 |
| PCOD8079170    | 15.72                       | 17.66                                 | 0.16                           | 1.6039                          | 0.0083               | 2.6187                          | 0.0290               | 3.0667                          | 0.0481               | 0.0330          | 0.1278          | 0.1876          | 0.0000                 | 0.0014                 |
| PCOD8287412    | 15.74                       | 17.65                                 | 0.17                           | 1.6038                          | 0.0067               | 2.6185                          | 0.0273               | 3.0670                          | 0.0574               | 0.0307          | 0.1319          | 0.2100          | 0.0001                 | 0.0013                 |
| PCOD8114602    | 15.75                       | 17.51                                 | 0.09                           | 1.6022                          | 0.0060               | 2.6162                          | 0.0201               | 3.0755                          | 0.0691               | 0.0197          | 0.0985          | 0.1913          | 0.0001                 | 0.0019                 |
| PCOD8323410    | 15.78                       | 17.51                                 | 0.11                           | 1.6048                          | 0.0072               | 2.6204                          | 0.0279               | 3.0609                          | 0.0452               | 0.0253          | 0.0900          | 0.1519          | 0.0000                 | 0.0004                 |
| PCOD8230242    | 15.78                       | 17.35                                 | 0.01                           | 1.6044                          | 0.0106               | 2.6196                          | 0.0358               | 3.0628                          | 0.0520               | 0.0410          | 0.1319          | 0.1880          | 0.0001                 | 0.0003                 |
| PCOD8194699    | 15.79                       | 17.70                                 | 0.26                           | 1.6037                          | 0.0079               | 2.6186                          | 0.0287               | 3.0674                          | 0.0448               | 0.0304          | 0.1222          | 0.1802          | 0.0001                 | 0.0013                 |
| PCOD8256774    | 15.80                       | 17.32                                 | 0.01                           | 1.6011                          | 0.0082               | 2.6143                          | 0.0320               | 3.0809                          | 0.0528               | 0.0332          | 0.1271          | 0.1844          | 0.0000                 | 0.0022                 |
| PCOD8177285    | 15.80                       | 17.41                                 | 0.07                           | 1.6043                          | 0.0077               | 2.6195                          | 0.0246               | 3.0641                          | 0.0542               | 0.0296          | 0.0884          | 0.2056          | 0.0000                 | 0.0010                 |

| Structure code | FD<br>(T nm <sup>-3</sup> ) | $\Delta E$<br>(kJ mol <sup>-1</sup> ) | $\nu$<br>(T nm <sup>-3</sup> ) | $\langle D_{TO} \rangle$<br>(Å) | $\sigma_{TO}$<br>(Å) | $\langle D_{OO} \rangle$<br>(Å) | $\sigma_{OO}$<br>(Å) | $\langle D_{TT} \rangle$<br>(Å) | $\sigma_{TT}$<br>(Å) | $R_{TO}$<br>(Å) | $R_{OO}$<br>(Å) | $R_{TT}$<br>(Å) | $\epsilon_{OO}$<br>(Å) | $\epsilon_{TT}$<br>(Å) |
|----------------|-----------------------------|---------------------------------------|--------------------------------|---------------------------------|----------------------|---------------------------------|----------------------|---------------------------------|----------------------|-----------------|-----------------|-----------------|------------------------|------------------------|
| PCOD8070065    | 15.80                       | 17.42                                 | 0.08                           | 1.6032                          | 0.0087               | 2.6177                          | 0.0286               | 3.0694                          | 0.0648               | 0.0361          | 0.1449          | 0.2228          | 0.0000                 | 0.0008                 |
| PCOD8250376    | 15.81                       | 17.65                                 | 0.24                           | 1.6040                          | 0.0107               | 2.6191                          | 0.0319               | 3.0654                          | 0.0599               | 0.0436          | 0.1317          | 0.2070          | 0.0000                 | 0.0008                 |
| PCOD8224299    | 15.82                       | 17.43                                 | 0.11                           | 1.6044                          | 0.0078               | 2.6196                          | 0.0253               | 3.0638                          | 0.0538               | 0.0320          | 0.0904          | 0.1926          | 0.0000                 | 0.0009                 |
| PCOD8323613    | 15.82                       | 17.43                                 | 0.11                           | 1.6028                          | 0.0080               | 2.6169                          | 0.0384               | 3.0735                          | 0.0271               | 0.0299          | 0.1205          | 0.1269          | 0.0001                 | 0.0028                 |
| PCOD8278736    | 15.84                       | 17.33                                 | 0.05                           | 1.6018                          | 0.0067               | 2.6154                          | 0.0264               | 3.0775                          | 0.0721               | 0.0219          | 0.1254          | 0.2138          | 0.0000                 | 0.0020                 |
| PCOD8328559    | 15.85                       | 17.42                                 | 0.12                           | 1.6048                          | 0.0113               | 2.6204                          | 0.0279               | 3.0605                          | 0.0477               | 0.0457          | 0.1014          | 0.1703          | 0.0001                 | 0.0002                 |
| PCOD8255699    | 15.86                       | 17.55                                 | 0.23                           | 1.6031                          | 0.0100               | 2.6177                          | 0.0279               | 3.0691                          | 0.0690               | 0.0356          | 0.1306          | 0.2036          | 0.0001                 | 0.0004                 |
| PCOD8202513    | 15.91                       | 17.48                                 | 0.22                           | 1.6050                          | 0.0094               | 2.6207                          | 0.0304               | 3.0603                          | 0.0455               | 0.0401          | 0.1169          | 0.1477          | 0.0001                 | 0.0007                 |
| PCOD8078965    | 15.92                       | 17.55                                 | 0.29                           | 1.6041                          | 0.0109               | 2.6191                          | 0.0324               | 3.0653                          | 0.0620               | 0.0472          | 0.1339          | 0.2664          | 0.0001                 | 0.0011                 |
| PCOD8287612    | 15.94                       | 17.25                                 | 0.10                           | 1.6036                          | 0.0092               | 2.6182                          | 0.0324               | 3.0690                          | 0.0704               | 0.0381          | 0.1474          | 0.2471          | 0.0001                 | 0.0023                 |
| PCOD8329960    | 15.95                       | 17.39                                 | 0.20                           | 1.6023                          | 0.0112               | 2.6161                          | 0.0382               | 3.0744                          | 0.0660               | 0.0415          | 0.1676          | 0.2444          | 0.0001                 | 0.0015                 |
| PCOD8256053    | 15.97                       | 17.43                                 | 0.25                           | 1.6030                          | 0.0102               | 2.6173                          | 0.0338               | 3.0719                          | 0.0693               | 0.0410          | 0.1337          | 0.2408          | 0.0001                 | 0.0025                 |
| PCOD8177530    | 15.97                       | 16.94                                 | 0.08                           | 1.6026                          | 0.0092               | 2.6166                          | 0.0318               | 3.0727                          | 0.0564               | 0.0330          | 0.1276          | 0.2186          | 0.0000                 | 0.0011                 |
| PCOD8079061    | 15.97                       | 16.92                                 | 0.09                           | 1.6033                          | 0.0073               | 2.6178                          | 0.0337               | 3.0699                          | 0.0399               | 0.0315          | 0.1363          | 0.1495          | 0.0000                 | 0.0017                 |
| PCOD8062906    | 15.99                       | 17.05                                 | 0.01                           | 1.6022                          | 0.0095               | 2.6158                          | 0.0387               | 3.0740                          | 0.0677               | 0.0353          | 0.1710          | 0.2142          | 0.0002                 | 0.0004                 |
| PCOD8210685    | 15.99                       | 17.04                                 | 0.01                           | 1.6034                          | 0.0058               | 2.6180                          | 0.0276               | 3.0693                          | 0.0442               | 0.0218          | 0.1005          | 0.1766          | 0.0000                 | 0.0017                 |
| PCOD8210396    | 15.99                       | 17.46                                 | 0.30                           | 1.6033                          | 0.0091               | 2.6179                          | 0.0305               | 3.0691                          | 0.0532               | 0.0432          | 0.1206          | 0.2055          | 0.0000                 | 0.0010                 |
| PCOD8084987    | 16.01                       | 17.15                                 | 0.11                           | 1.6021                          | 0.0104               | 2.6157                          | 0.0373               | 3.0756                          | 0.0618               | 0.0556          | 0.1605          | 0.2574          | 0.0002                 | 0.0016                 |
| PCOD8225818    | 16.02                       | 17.02                                 | 0.02                           | 1.6022                          | 0.0095               | 2.6159                          | 0.0385               | 3.0735                          | 0.0680               | 0.0363          | 0.1929          | 0.2149          | 0.0002                 | 0.0003                 |
| PCOD8292985    | 16.02                       | 17.04                                 | 0.03                           | 1.6039                          | 0.0106               | 2.6189                          | 0.0259               | 3.0659                          | 0.0639               | 0.0424          | 0.1035          | 0.2255          | 0.0001                 | 0.0006                 |
| PCOD8328802    | 16.03                       | 17.42                                 | 0.31                           | 1.6017                          | 0.0099               | 2.6154                          | 0.0323               | 3.0765                          | 0.0586               | 0.0363          | 0.1275          | 0.2095          | 0.0001                 | 0.0008                 |
| PCOD8230406    | 16.05                       | 17.01                                 | 0.05                           | 1.6047                          | 0.0085               | 2.6201                          | 0.0352               | 3.0620                          | 0.0550               | 0.0366          | 0.1483          | 0.2155          | 0.0001                 | 0.0010                 |
| PCOD8206627    | 16.06                       | 17.09                                 | 0.11                           | 1.6036                          | 0.0081               | 2.6183                          | 0.0317               | 3.0673                          | 0.0528               | 0.0381          | 0.1511          | 0.1855          | 0.0001                 | 0.0009                 |
| PCOD8224431    | 16.07                       | 17.15                                 | 0.16                           | 1.6047                          | 0.0085               | 2.6201                          | 0.0286               | 3.0619                          | 0.0524               | 0.0341          | 0.1235          | 0.1752          | 0.0000                 | 0.0006                 |
| PCOD8177499    | 16.07                       | 17.15                                 | 0.16                           | 1.6047                          | 0.0085               | 2.6201                          | 0.0286               | 3.0619                          | 0.0524               | 0.0340          | 0.1234          | 0.1755          | 0.0000                 | 0.0006                 |
| PCOD8250241    | 16.08                       | 16.94                                 | 0.03                           | 1.6004                          | 0.0081               | 2.6132                          | 0.0226               | 3.0847                          | 0.0583               | 0.0283          | 0.0878          | 0.1810          | 0.0001                 | 0.0023                 |
| PCOD8210273    | 16.08                       | 17.05                                 | 0.11                           | 1.6031                          | 0.0050               | 2.6176                          | 0.0260               | 3.0703                          | 0.0336               | 0.0176          | 0.1076          | 0.1108          | 0.0000                 | 0.0014                 |
| PCOD8267131    | 16.10                       | 17.06                                 | 0.13                           | 1.6035                          | 0.0083               | 2.6183                          | 0.0256               | 3.0677                          | 0.0507               | 0.0289          | 0.0907          | 0.2166          | 0.0001                 | 0.0007                 |
| PCOD8267175    | 16.10                       | 17.13                                 | 0.18                           | 1.6035                          | 0.0086               | 2.6182                          | 0.0316               | 3.0680                          | 0.0459               | 0.0372          | 0.1426          | 0.2012          | 0.0000                 | 0.0010                 |
| PCOD8206619    | 16.11                       | 17.12                                 | 0.18                           | 1.6020                          | 0.0086               | 2.6157                          | 0.0287               | 3.0762                          | 0.0570               | 0.0295          | 0.1078          | 0.1792          | 0.0000                 | 0.0016                 |
| PCOD8275162    | 16.12                       | 16.81                                 | 0.02                           | 1.6029                          | 0.0040               | 2.6173                          | 0.0289               | 3.0722                          | 0.0317               | 0.0263          | 0.0888          | 0.1753          | 0.0000                 | 0.0025                 |

| Structure code | FD<br>(T nm <sup>-3</sup> ) | $\Delta E$<br>(kJ mol <sup>-1</sup> ) | $\nu$<br>(T nm <sup>-3</sup> ) | $\langle D_{TO} \rangle$<br>(Å) | $\sigma_{TO}$<br>(Å) | $\langle D_{OO} \rangle$<br>(Å) | $\sigma_{OO}$<br>(Å) | $\langle D_{TT} \rangle$<br>(Å) | $\sigma_{TT}$<br>(Å) | $R_{TO}$<br>(Å) | $R_{OO}$<br>(Å) | $R_{TT}$<br>(Å) | $\epsilon_{OO}$<br>(Å) | $\epsilon_{TT}$<br>(Å) |
|----------------|-----------------------------|---------------------------------------|--------------------------------|---------------------------------|----------------------|---------------------------------|----------------------|---------------------------------|----------------------|-----------------|-----------------|-----------------|------------------------|------------------------|
| PCOD8191840    | 16.14                       | 17.04                                 | 0.16                           | 1.6050                          | 0.0089               | 2.6206                          | 0.0306               | 3.0596                          | 0.0562               | 0.0329          | 0.1184          | 0.2041          | 0.0001                 | 0.0002                 |
| PCOD8323492    | 16.15                       | 16.98                                 | 0.13                           | 1.6049                          | 0.0062               | 2.6205                          | 0.0327               | 3.0615                          | 0.0326               | 0.0266          | 0.1170          | 0.1367          | 0.0000                 | 0.0012                 |
| PCOD8325695    | 16.17                       | 16.79                                 | 0.02                           | 1.6020                          | 0.0112               | 2.6153                          | 0.0422               | 3.0760                          | 0.0567               | 0.0546          | 0.2535          | 0.2429          | 0.0004                 | 0.0014                 |
| PCOD8275535    | 16.17                       | 17.05                                 | 0.19                           | 1.6044                          | 0.0103               | 2.6197                          | 0.0227               | 3.0629                          | 0.0673               | 0.0409          | 0.0943          | 0.1800          | 0.0001                 | 0.0002                 |
| PCOD8308140    | 16.18                       | 16.78                                 | 0.02                           | 1.6014                          | 0.0063               | 2.6149                          | 0.0297               | 3.0790                          | 0.0364               | 0.0308          | 0.1044          | 0.1766          | 0.0000                 | 0.0019                 |
| PCOD8068222    | 16.18                       | 17.08                                 | 0.23                           | 1.6014                          | 0.0077               | 2.6145                          | 0.0356               | 3.0794                          | 0.0585               | 0.0320          | 0.1608          | 0.2408          | 0.0002                 | 0.0021                 |
| PCOD8230860    | 16.19                       | 17.03                                 | 0.20                           | 1.6031                          | 0.0108               | 2.6175                          | 0.0387               | 3.0698                          | 0.0561               | 0.0434          | 0.1684          | 0.2318          | 0.0001                 | 0.0009                 |
| PCOD8086151    | 16.19                       | 16.99                                 | 0.17                           | 1.6039                          | 0.0091               | 2.6189                          | 0.0300               | 3.0661                          | 0.0611               | 0.0321          | 0.1102          | 0.2024          | 0.0001                 | 0.0009                 |
| PCOD8240750    | 16.19                       | 16.85                                 | 0.08                           | 1.6038                          | 0.0085               | 2.6187                          | 0.0296               | 3.0668                          | 0.0602               | 0.0326          | 0.1030          | 0.2091          | 0.0001                 | 0.0010                 |
| PCOD8057974    | 16.22                       | 16.90                                 | 0.15                           | 1.6032                          | 0.0052               | 2.6178                          | 0.0227               | 3.0700                          | 0.0402               | 0.0229          | 0.0745          | 0.1903          | 0.0001                 | 0.0017                 |
| PCOD8207762    | 16.23                       | 16.98                                 | 0.21                           | 1.6036                          | 0.0112               | 2.6184                          | 0.0275               | 3.0671                          | 0.0578               | 0.0399          | 0.1067          | 0.2286          | 0.0001                 | 0.0005                 |
| PCOD8256732    | 16.24                       | 16.87                                 | 0.14                           | 1.6010                          | 0.0081               | 2.6142                          | 0.0298               | 3.0806                          | 0.0330               | 0.0287          | 0.0975          | 0.1072          | 0.0001                 | 0.0014                 |
| PCOD8059987    | 16.24                       | 16.79                                 | 0.09                           | 1.6022                          | 0.0099               | 2.6160                          | 0.0313               | 3.0746                          | 0.0555               | 0.0396          | 0.1382          | 0.1796          | 0.0000                 | 0.0012                 |
| PCOD8208038    | 16.25                       | 16.65                                 | 0.00                           | 1.6030                          | 0.0079               | 2.6175                          | 0.0284               | 3.0710                          | 0.0390               | 0.0282          | 0.1040          | 0.1519          | 0.0001                 | 0.0015                 |
| PCOD8207692    | 16.25                       | 16.74                                 | 0.06                           | 1.6018                          | 0.0092               | 2.6155                          | 0.0307               | 3.0767                          | 0.0591               | 0.0370          | 0.1318          | 0.1821          | 0.0000                 | 0.0014                 |
| PCOD8241500    | 16.26                       | 16.96                                 | 0.23                           | 1.6017                          | 0.0121               | 2.6153                          | 0.0313               | 3.0768                          | 0.0578               | 0.0464          | 0.1272          | 0.2242          | 0.0000                 | 0.0009                 |
| PCOD8208037    | 16.27                       | 16.89                                 | 0.18                           | 1.6035                          | 0.0100               | 2.6183                          | 0.0284               | 3.0672                          | 0.0529               | 0.0351          | 0.1109          | 0.2114          | 0.0001                 | 0.0003                 |
| PCOD8217827    | 16.33                       | 16.78                                 | 0.17                           | 1.6022                          | 0.0087               | 2.6160                          | 0.0260               | 3.0752                          | 0.0546               | 0.0312          | 0.0936          | 0.1928          | 0.0000                 | 0.0017                 |
| PCOD8188235    | 16.34                       | 16.61                                 | 0.06                           | 1.6030                          | 0.0086               | 2.6174                          | 0.0278               | 3.0702                          | 0.0616               | 0.0333          | 0.1097          | 0.2121          | 0.0001                 | 0.0008                 |
| PCOD8269333    | 16.36                       | 16.54                                 | 0.03                           | 1.6021                          | 0.0102               | 2.6159                          | 0.0284               | 3.0746                          | 0.0579               | 0.0350          | 0.1298          | 0.2231          | 0.0001                 | 0.0005                 |
| PCOD8235524    | 16.37                       | 16.49                                 | 0.01                           | 1.6034                          | 0.0090               | 2.6180                          | 0.0300               | 3.0682                          | 0.0595               | 0.0348          | 0.1132          | 0.1670          | 0.0000                 | 0.0007                 |
| PCOD8230781    | 16.37                       | 16.67                                 | 0.14                           | 1.6049                          | 0.0094               | 2.6204                          | 0.0301               | 3.0605                          | 0.0609               | 0.0425          | 0.1255          | 0.2312          | 0.0000                 | 0.0003                 |
| PCOD8193306    | 16.38                       | 16.56                                 | 0.06                           | 1.6035                          | 0.0078               | 2.6182                          | 0.0265               | 3.0685                          | 0.0423               | 0.0290          | 0.1083          | 0.1690          | 0.0001                 | 0.0013                 |
| PCOD8255000    | 16.38                       | 16.54                                 | 0.06                           | 1.6035                          | 0.0078               | 2.6183                          | 0.0264               | 3.0684                          | 0.0422               | 0.0295          | 0.1040          | 0.1669          | 0.0001                 | 0.0013                 |
| PCOD8095196    | 16.39                       | 16.58                                 | 0.09                           | 1.6024                          | 0.0071               | 2.6164                          | 0.0282               | 3.0735                          | 0.0289               | 0.0237          | 0.0970          | 0.0865          | 0.0000                 | 0.0011                 |
| PCOD8058374    | 16.39                       | 16.49                                 | 0.04                           | 1.6034                          | 0.0085               | 2.6179                          | 0.0374               | 3.0683                          | 0.0397               | 0.0393          | 0.1650          | 0.1844          | 0.0001                 | 0.0008                 |
| PCOD8328480    | 16.40                       | 16.61                                 | 0.13                           | 1.6029                          | 0.0105               | 2.6173                          | 0.0273               | 3.0697                          | 0.0602               | 0.0436          | 0.1013          | 0.2239          | 0.0000                 | 0.0002                 |
| PCOD8258299    | 16.40                       | 16.52                                 | 0.07                           | 1.6025                          | 0.0071               | 2.6166                          | 0.0255               | 3.0731                          | 0.0317               | 0.0245          | 0.0916          | 0.1296          | 0.0001                 | 0.0010                 |
| PCOD8267808    | 16.40                       | 16.56                                 | 0.09                           | 1.6022                          | 0.0082               | 2.6161                          | 0.0308               | 3.0748                          | 0.0479               | 0.0313          | 0.1230          | 0.1662          | 0.0000                 | 0.0015                 |
| PCOD8079227    | 16.41                       | 16.74                                 | 0.22                           | 1.6043                          | 0.0069               | 2.6194                          | 0.0274               | 3.0644                          | 0.0399               | 0.0249          | 0.1160          | 0.1763          | 0.0000                 | 0.0011                 |
| PCOD8207879    | 16.41                       | 16.50                                 | 0.06                           | 1.6011                          | 0.0095               | 2.6143                          | 0.0286               | 3.0796                          | 0.0635               | 0.0404          | 0.1398          | 0.1977          | 0.0000                 | 0.0010                 |

| Structure code     | FD<br>(T nm <sup>-3</sup> ) | $\Delta E$<br>(kJ mol <sup>-1</sup> ) | $\nu$<br>(T nm <sup>-3</sup> ) | $\langle D_{TO} \rangle$<br>(Å) | $\sigma_{TO}$<br>(Å) | $\langle D_{OO} \rangle$<br>(Å) | $\sigma_{OO}$<br>(Å) | $\langle D_{TT} \rangle$<br>(Å) | $\sigma_{TT}$<br>(Å) | $R_{TO}$<br>(Å) | $R_{OO}$<br>(Å) | $R_{TT}$<br>(Å) | $\epsilon_{OO}$<br>(Å) | $\epsilon_{TT}$<br>(Å) |
|--------------------|-----------------------------|---------------------------------------|--------------------------------|---------------------------------|----------------------|---------------------------------|----------------------|---------------------------------|----------------------|-----------------|-----------------|-----------------|------------------------|------------------------|
| <b>PCOD8178950</b> | 16.43                       | 16.44                                 | 0.04                           | 1.6019                          | 0.0105               | 2.6156                          | 0.0307               | 3.0758                          | 0.0631               | 0.0415          | 0.1056          | 0.2066          | 0.0001                 | 0.0009                 |
| <b>PCOD8241484</b> | 16.44                       | 16.47                                 | 0.07                           | 1.6039                          | 0.0122               | 2.6187                          | 0.0334               | 3.0646                          | 0.0521               | 0.0482          | 0.1558          | 0.1944          | 0.0001                 | 0.0007                 |
| <b>PCOD8206399</b> | 16.47                       | 16.56                                 | 0.16                           | 1.6038                          | 0.0094               | 2.6185                          | 0.0366               | 3.0665                          | 0.0614               | 0.0537          | 0.1749          | 0.2612          | 0.0002                 | 0.0008                 |
| <b>PCOD8274259</b> | 16.47                       | 16.52                                 | 0.13                           | 1.6021                          | 0.0077               | 2.6160                          | 0.0245               | 3.0754                          | 0.0452               | 0.0283          | 0.0964          | 0.1699          | 0.0001                 | 0.0013                 |
| <b>PCOD8086115</b> | 16.49                       | 16.44                                 | 0.10                           | 1.6044                          | 0.0067               | 2.6198                          | 0.0267               | 3.0627                          | 0.0364               | 0.0276          | 0.1191          | 0.1587          | 0.0001                 | 0.0002                 |
| <b>PCOD8327034</b> | 16.50                       | 16.48                                 | 0.14                           | 1.6021                          | 0.0081               | 2.6159                          | 0.0300               | 3.0757                          | 0.0273               | 0.0308          | 0.0844          | 0.1033          | 0.0001                 | 0.0016                 |
| <b>PCOD8321602</b> | 16.51                       | 16.35                                 | 0.05                           | 1.6021                          | 0.0082               | 2.6159                          | 0.0300               | 3.0756                          | 0.0265               | 0.0303          | 0.0831          | 0.1018          | 0.0001                 | 0.0015                 |
| <b>PCOD8240361</b> | 16.53                       | 16.38                                 | 0.10                           | 1.6028                          | 0.0110               | 2.6170                          | 0.0308               | 3.0716                          | 0.0592               | 0.0379          | 0.1295          | 0.2158          | 0.0000                 | 0.0010                 |
| <b>PCOD8061081</b> | 16.55                       | 16.31                                 | 0.07                           | 1.6030                          | 0.0089               | 2.6174                          | 0.0308               | 3.0705                          | 0.0608               | 0.0373          | 0.1222          | 0.1929          | 0.0001                 | 0.0010                 |
| <b>PCOD8057904</b> | 16.55                       | 16.27                                 | 0.04                           | 1.6004                          | 0.0100               | 2.6132                          | 0.0292               | 3.0836                          | 0.0556               | 0.0284          | 0.1073          | 0.1763          | 0.0000                 | 0.0015                 |
| <b>PCOD8057902</b> | 16.56                       | 16.39                                 | 0.13                           | 1.6022                          | 0.0088               | 2.6161                          | 0.0330               | 3.0747                          | 0.0425               | 0.0371          | 0.1550          | 0.1548          | 0.0000                 | 0.0013                 |
| <b>PCOD8196809</b> | 16.58                       | 16.39                                 | 0.15                           | 1.6016                          | 0.0104               | 2.6152                          | 0.0274               | 3.0767                          | 0.0614               | 0.0460          | 0.1066          | 0.2394          | 0.0001                 | 0.0006                 |
| <b>PCOD8080521</b> | 16.59                       | 16.33                                 | 0.11                           | 1.6031                          | 0.0050               | 2.6176                          | 0.0260               | 3.0703                          | 0.0336               | 0.0176          | 0.1076          | 0.1108          | 0.0000                 | 0.0014                 |
| <b>PCOD8230494</b> | 16.60                       | 16.30                                 | 0.11                           | 1.6016                          | 0.0073               | 2.6151                          | 0.0336               | 3.0774                          | 0.0319               | 0.0360          | 0.1588          | 0.1575          | 0.0001                 | 0.0013                 |
| <b>PCOD8195148</b> | 16.61                       | 16.36                                 | 0.16                           | 1.6021                          | 0.0069               | 2.6160                          | 0.0285               | 3.0755                          | 0.0344               | 0.0296          | 0.0895          | 0.1699          | 0.0000                 | 0.0018                 |
| <b>PCOD8039026</b> | 16.62                       | 15.99                                 | 0.08                           | 1.6041                          | 0.0129               | 2.6191                          | 0.0280               | 3.0621                          | 0.0599               | 0.0485          | 0.1235          | 0.2094          | 0.0000                 | 0.0021                 |
| <b>PCOD8203076</b> | 16.64                       | 16.35                                 | 0.19                           | 1.6037                          | 0.0089               | 2.6186                          | 0.0253               | 3.0662                          | 0.0593               | 0.0439          | 0.1224          | 0.2066          | 0.0001                 | 0.0000                 |
| <b>PCOD8092398</b> | 16.64                       | 16.07                                 | 0.00                           | 1.6035                          | 0.0100               | 2.6183                          | 0.0284               | 3.0672                          | 0.0529               | 0.0351          | 0.1109          | 0.2114          | 0.0001                 | 0.0003                 |
| <b>PCOD8323621</b> | 16.64                       | 16.09                                 | 0.01                           | 1.6014                          | 0.0079               | 2.6149                          | 0.0321               | 3.0788                          | 0.0291               | 0.0342          | 0.0951          | 0.1023          | 0.0000                 | 0.0016                 |
| <b>PCOD8250952</b> | 16.65                       | 16.26                                 | 0.14                           | 1.6030                          | 0.0110               | 2.6172                          | 0.0334               | 3.0701                          | 0.0471               | 0.0507          | 0.1407          | 0.1958          | 0.0001                 | 0.0005                 |
| <b>PCOD8250953</b> | 16.66                       | 16.26                                 | 0.15                           | 1.6031                          | 0.0104               | 2.6174                          | 0.0320               | 3.0692                          | 0.0471               | 0.0476          | 0.1375          | 0.1987          | 0.0001                 | 0.0002                 |
| <b>PCOD8084263</b> | 16.67                       | 16.19                                 | 0.11                           | 1.6039                          | 0.0070               | 2.6188                          | 0.0341               | 3.0653                          | 0.0498               | 0.0306          | 0.1582          | 0.1761          | 0.0001                 | 0.0005                 |
| <b>PCOD8278785</b> | 16.67                       | 16.21                                 | 0.12                           | 1.6022                          | 0.0088               | 2.6161                          | 0.0330               | 3.0747                          | 0.0425               | 0.0371          | 0.1550          | 0.1548          | 0.0000                 | 0.0013                 |
| <b>PCOD8208422</b> | 16.69                       | 16.15                                 | 0.10                           | 1.6016                          | 0.0104               | 2.6152                          | 0.0274               | 3.0767                          | 0.0614               | 0.0460          | 0.1066          | 0.2394          | 0.0001                 | 0.0006                 |
| <b>PCOD8191720</b> | 16.69                       | 16.13                                 | 0.08                           | 1.6027                          | 0.0084               | 2.6168                          | 0.0331               | 3.0717                          | 0.0458               | 0.0339          | 0.1593          | 0.1453          | 0.0001                 | 0.0007                 |
| <b>PCOD8322663</b> | 16.70                       | 16.14                                 | 0.11                           | 1.6011                          | 0.0076               | 2.6144                          | 0.0326               | 3.0804                          | 0.0303               | 0.0362          | 0.1020          | 0.0994          | 0.0000                 | 0.0018                 |
| <b>PCOD8172642</b> | 16.70                       | 16.06                                 | 0.05                           | 1.6025                          | 0.0097               | 2.6167                          | 0.0250               | 3.0720                          | 0.0573               | 0.0383          | 0.1177          | 0.1865          | 0.0001                 | 0.0003                 |
| <b>PCOD8210381</b> | 16.72                       | 16.01                                 | 0.03                           | 1.6026                          | 0.0066               | 2.6168                          | 0.0276               | 3.0726                          | 0.0441               | 0.0235          | 0.1206          | 0.1750          | 0.0000                 | 0.0013                 |
| <b>PCOD8321603</b> | 16.73                       | 16.17                                 | 0.15                           | 1.6014                          | 0.0086               | 2.6149                          | 0.0337               | 3.0786                          | 0.0329               | 0.0311          | 0.1114          | 0.1142          | 0.0000                 | 0.0015                 |
| <b>PCOD8182548</b> | 16.74                       | 16.31                                 | 0.26                           | 1.6001                          | 0.0105               | 2.6126                          | 0.0313               | 3.0853                          | 0.0589               | 0.0344          | 0.1272          | 0.1804          | 0.0000                 | 0.0015                 |
| <b>PCOD8060448</b> | 16.75                       | 16.00                                 | 0.05                           | 1.6028                          | 0.0095               | 2.6172                          | 0.0263               | 3.0706                          | 0.0567               | 0.0317          | 0.1248          | 0.1866          | 0.0001                 | 0.0004                 |

| Structure code | FD<br>(T nm <sup>-3</sup> ) | $\Delta E$<br>(kJ mol <sup>-1</sup> ) | $\nu$<br>(T nm <sup>-3</sup> ) | $\langle D_{TO} \rangle$<br>(Å) | $\sigma_{TO}$<br>(Å) | $\langle D_{OO} \rangle$<br>(Å) | $\sigma_{OO}$<br>(Å) | $\langle D_{TT} \rangle$<br>(Å) | $\sigma_{TT}$<br>(Å) | $R_{TO}$<br>(Å) | $R_{OO}$<br>(Å) | $R_{TT}$<br>(Å) | $\epsilon_{OO}$<br>(Å) | $\epsilon_{TT}$<br>(Å) |
|----------------|-----------------------------|---------------------------------------|--------------------------------|---------------------------------|----------------------|---------------------------------|----------------------|---------------------------------|----------------------|-----------------|-----------------|-----------------|------------------------|------------------------|
| PCOD8235418    | 16.75                       | 16.14                                 | 0.15                           | 1.6014                          | 0.0094               | 2.6148                          | 0.0280               | 3.0785                          | 0.0539               | 0.0347          | 0.1102          | 0.1781          | 0.0000                 | 0.0011                 |
| PCOD8327059    | 16.76                       | 16.18                                 | 0.19                           | 1.6008                          | 0.0070               | 2.6139                          | 0.0328               | 3.0819                          | 0.0308               | 0.0374          | 0.1011          | 0.0929          | 0.0001                 | 0.0019                 |
| PCOD8278786    | 16.76                       | 16.06                                 | 0.11                           | 1.6040                          | 0.0098               | 2.6190                          | 0.0266               | 3.0639                          | 0.0499               | 0.0411          | 0.1094          | 0.1868          | 0.0000                 | 0.0006                 |
| PCOD8069007    | 16.77                       | 16.06                                 | 0.11                           | 1.6035                          | 0.0117               | 2.6182                          | 0.0291               | 3.0671                          | 0.0592               | 0.0474          | 0.1104          | 0.2426          | 0.0000                 | 0.0002                 |
| PCOD8251564    | 16.78                       | 16.03                                 | 0.10                           | 1.6022                          | 0.0091               | 2.6161                          | 0.0306               | 3.0745                          | 0.0447               | 0.0376          | 0.1216          | 0.1544          | 0.0000                 | 0.0012                 |
| PCOD8327031    | 16.78                       | 16.03                                 | 0.11                           | 1.6012                          | 0.0082               | 2.6145                          | 0.0316               | 3.0799                          | 0.0326               | 0.0400          | 0.1056          | 0.1116          | 0.0001                 | 0.0015                 |
| PCOD8312438    | 16.82                       | 15.95                                 | 0.09                           | 1.6022                          | 0.0056               | 2.6161                          | 0.0320               | 3.0748                          | 0.0246               | 0.0237          | 0.1075          | 0.1081          | 0.0000                 | 0.0014                 |
| PCOD8097531    | 16.82                       | 16.05                                 | 0.16                           | 1.6028                          | 0.0101               | 2.6169                          | 0.0321               | 3.0700                          | 0.0620               | 0.0402          | 0.1546          | 0.2057          | 0.0002                 | 0.0004                 |
| PCOD8321601    | 16.83                       | 15.85                                 | 0.03                           | 1.6003                          | 0.0078               | 2.6131                          | 0.0354               | 3.0846                          | 0.0334               | 0.0307          | 0.1132          | 0.0981          | 0.0000                 | 0.0020                 |
| PCOD8236883    | 16.84                       | 15.85                                 | 0.04                           | 1.6060                          | 0.0085               | 2.6221                          | 0.0352               | 3.0536                          | 0.0486               | 0.0409          | 0.1640          | 0.2120          | 0.0002                 | 0.0012                 |
| PCOD8082880    | 16.86                       | 15.82                                 | 0.04                           | 1.6049                          | 0.0083               | 2.6206                          | 0.0255               | 3.0609                          | 0.0479               | 0.0257          | 0.0999          | 0.1596          | 0.0000                 | 0.0010                 |
| PCOD8321883    | 16.86                       | 15.87                                 | 0.08                           | 1.6005                          | 0.0060               | 2.6134                          | 0.0330               | 3.0837                          | 0.0305               | 0.0163          | 0.0914          | 0.0751          | 0.0001                 | 0.0019                 |
| PCOD8098851    | 16.88                       | 15.97                                 | 0.16                           | 1.6031                          | 0.0094               | 2.6176                          | 0.0339               | 3.0690                          | 0.0563               | 0.0351          | 0.1401          | 0.2005          | 0.0000                 | 0.0001                 |
| PCOD8095713    | 16.88                       | 15.87                                 | 0.10                           | 1.6032                          | 0.0052               | 2.6178                          | 0.0227               | 3.0700                          | 0.0402               | 0.0229          | 0.0745          | 0.1903          | 0.0001                 | 0.0017                 |
| PCOD8322681    | 16.90                       | 15.82                                 | 0.08                           | 1.6010                          | 0.0081               | 2.6142                          | 0.0298               | 3.0806                          | 0.0330               | 0.0287          | 0.0975          | 0.1072          | 0.0001                 | 0.0014                 |
| PCOD8098730    | 16.91                       | 15.63                                 | 0.03                           | 1.6022                          | 0.0076               | 2.6161                          | 0.0289               | 3.0745                          | 0.0471               | 0.0323          | 0.1172          | 0.1835          | 0.0000                 | 0.0010                 |
| PCOD8202351    | 16.93                       | 15.79                                 | 0.10                           | 1.6028                          | 0.0113               | 2.6169                          | 0.0330               | 3.0708                          | 0.0657               | 0.0523          | 0.1892          | 0.3043          | 0.0001                 | 0.0003                 |
| PCOD8081675    | 16.94                       | 15.72                                 | 0.05                           | 1.6018                          | 0.0079               | 2.6154                          | 0.0253               | 3.0768                          | 0.0502               | 0.0306          | 0.0920          | 0.1895          | 0.0000                 | 0.0013                 |
| PCOD8318576    | 16.95                       | 15.63                                 | 0.00                           | 1.6024                          | 0.0057               | 2.6164                          | 0.0298               | 3.0734                          | 0.0299               | 0.0220          | 0.1117          | 0.1275          | 0.0000                 | 0.0009                 |
| PCOD8089713    | 16.95                       | 15.87                                 | 0.17                           | 1.6021                          | 0.0103               | 2.6158                          | 0.0348               | 3.0747                          | 0.0563               | 0.0447          | 0.1291          | 0.1916          | 0.0000                 | 0.0006                 |
| PCOD8080398    | 16.96                       | 15.77                                 | 0.10                           | 1.6014                          | 0.0077               | 2.6145                          | 0.0356               | 3.0794                          | 0.0585               | 0.0320          | 0.1608          | 0.2408          | 0.0002                 | 0.0021                 |
| PCOD8323706    | 16.98                       | 15.71                                 | 0.09                           | 1.6002                          | 0.0074               | 2.6129                          | 0.0312               | 3.0848                          | 0.0334               | 0.0278          | 0.0939          | 0.1036          | 0.0001                 | 0.0016                 |
| PCOD8085501    | 16.99                       | 15.66                                 | 0.06                           | 1.5983                          | 0.0109               | 2.6097                          | 0.0269               | 3.0938                          | 0.0594               | 0.0309          | 0.1147          | 0.1710          | 0.0000                 | 0.0013                 |
| PCOD8070627    | 16.99                       | 15.63                                 | 0.04                           | 1.6058                          | 0.0093               | 2.6220                          | 0.0260               | 3.0542                          | 0.0570               | 0.0309          | 0.0993          | 0.1886          | 0.0001                 | 0.0018                 |
| PCOD8211431    | 17.01                       | 15.62                                 | 0.05                           | 1.6017                          | 0.0075               | 2.6153                          | 0.0301               | 3.0767                          | 0.0625               | 0.0240          | 0.1023          | 0.2205          | 0.0001                 | 0.0011                 |
| PCOD8060446    | 17.01                       | 15.67                                 | 0.09                           | 1.6022                          | 0.0104               | 2.6160                          | 0.0343               | 3.0737                          | 0.0666               | 0.0471          | 0.1436          | 0.2592          | 0.0001                 | 0.0002                 |
| PCOD8290013    | 17.02                       | 15.65                                 | 0.08                           | 1.6021                          | 0.0105               | 2.6159                          | 0.0304               | 3.0744                          | 0.0646               | 0.0393          | 0.1207          | 0.2116          | 0.0000                 | 0.0006                 |
| PCOD8060562    | 17.02                       | 15.60                                 | 0.05                           | 1.6021                          | 0.0103               | 2.6159                          | 0.0343               | 3.0739                          | 0.0663               | 0.0504          | 0.1450          | 0.2546          | 0.0001                 | 0.0002                 |
| PCOD8257504    | 17.03                       | 15.76                                 | 0.18                           | 1.6006                          | 0.0065               | 2.6135                          | 0.0279               | 3.0825                          | 0.0370               | 0.0292          | 0.0954          | 0.1285          | 0.0001                 | 0.0012                 |
| PCOD8067544    | 17.04                       | 15.62                                 | 0.08                           | 1.6006                          | 0.0086               | 2.6136                          | 0.0273               | 3.0825                          | 0.0551               | 0.0286          | 0.0949          | 0.1523          | 0.0001                 | 0.0015                 |
| PCOD8085973    | 17.05                       | 15.64                                 | 0.11                           | 1.6040                          | 0.0098               | 2.6190                          | 0.0266               | 3.0639                          | 0.0499               | 0.0411          | 0.1094          | 0.1868          | 0.0000                 | 0.0006                 |

| Structure code | FD<br>(T nm <sup>-3</sup> ) | $\Delta E$<br>(kJ mol <sup>-1</sup> ) | $\nu$<br>(T nm <sup>-3</sup> ) | $\langle D_{TO} \rangle$<br>(Å) | $\sigma_{TO}$<br>(Å) | $\langle D_{OO} \rangle$<br>(Å) | $\sigma_{OO}$<br>(Å) | $\langle D_{TT} \rangle$<br>(Å) | $\sigma_{TT}$<br>(Å) | $R_{TO}$<br>(Å) | $R_{OO}$<br>(Å) | $R_{TT}$<br>(Å) | $\epsilon_{OO}$<br>(Å) | $\epsilon_{TT}$<br>(Å) |
|----------------|-----------------------------|---------------------------------------|--------------------------------|---------------------------------|----------------------|---------------------------------|----------------------|---------------------------------|----------------------|-----------------|-----------------|-----------------|------------------------|------------------------|
| PCOD8323672    | 17.08                       | 15.50                                 | 0.04                           | 1.6001                          | 0.0078               | 2.6127                          | 0.0328               | 3.0852                          | 0.0338               | 0.0276          | 0.1145          | 0.1374          | 0.0001                 | 0.0016                 |
| PCOD8307622    | 17.08                       | 15.55                                 | 0.08                           | 1.6027                          | 0.0046               | 2.6170                          | 0.0314               | 3.0720                          | 0.0184               | 0.0171          | 0.0864          | 0.0668          | 0.0001                 | 0.0011                 |
| PCOD8207078    | 17.09                       | 15.54                                 | 0.07                           | 1.6043                          | 0.0098               | 2.6196                          | 0.0284               | 3.0623                          | 0.0544               | 0.0402          | 0.1196          | 0.1660          | 0.0000                 | 0.0006                 |
| PCOD8085277    | 17.11                       | 15.57                                 | 0.12                           | 1.6005                          | 0.0090               | 2.6134                          | 0.0251               | 3.0829                          | 0.0503               | 0.0274          | 0.0881          | 0.1805          | 0.0001                 | 0.0013                 |
| PCOD8321848    | 17.11                       | 15.57                                 | 0.12                           | 1.6005                          | 0.0087               | 2.6133                          | 0.0280               | 3.0831                          | 0.0351               | 0.0281          | 0.0787          | 0.1207          | 0.0001                 | 0.0012                 |
| PCOD8070958    | 17.11                       | 15.59                                 | 0.13                           | 1.6030                          | 0.0097               | 2.6171                          | 0.0372               | 3.0691                          | 0.0639               | 0.0404          | 0.1535          | 0.2374          | 0.0003                 | 0.0003                 |
| PCOD8323709    | 17.12                       | 15.41                                 | 0.02                           | 1.5994                          | 0.0083               | 2.6115                          | 0.0310               | 3.0889                          | 0.0372               | 0.0334          | 0.1051          | 0.1016          | 0.0000                 | 0.0017                 |
| PCOD8323711    | 17.15                       | 15.46                                 | 0.09                           | 1.5998                          | 0.0078               | 2.6123                          | 0.0301               | 3.0865                          | 0.0342               | 0.0290          | 0.1016          | 0.1325          | 0.0001                 | 0.0015                 |
| PCOD8323707    | 17.16                       | 15.48                                 | 0.11                           | 1.5998                          | 0.0079               | 2.6123                          | 0.0310               | 3.0865                          | 0.0351               | 0.0249          | 0.0977          | 0.1341          | 0.0001                 | 0.0014                 |
| PCOD8268895    | 17.17                       | 15.47                                 | 0.12                           | 1.6016                          | 0.0078               | 2.6151                          | 0.0316               | 3.0775                          | 0.0489               | 0.0310          | 0.1201          | 0.1657          | 0.0000                 | 0.0011                 |
| PCOD8327151    | 17.19                       | 15.30                                 | 0.02                           | 1.5994                          | 0.0075               | 2.6116                          | 0.0302               | 3.0886                          | 0.0331               | 0.0309          | 0.0917          | 0.1247          | 0.0001                 | 0.0016                 |
| PCOD8327150    | 17.20                       | 15.33                                 | 0.04                           | 1.5994                          | 0.0076               | 2.6115                          | 0.0307               | 3.0888                          | 0.0346               | 0.0325          | 0.0963          | 0.1308          | 0.0001                 | 0.0016                 |
| PCOD8059902    | 17.22                       | 15.37                                 | 0.09                           | 1.6029                          | 0.0089               | 2.6173                          | 0.0281               | 3.0694                          | 0.0565               | 0.0356          | 0.1211          | 0.1923          | 0.0001                 | 0.0005                 |
| PCOD8178240    | 17.22                       | 15.34                                 | 0.07                           | 1.6038                          | 0.0103               | 2.6186                          | 0.0330               | 3.0654                          | 0.0590               | 0.0456          | 0.1384          | 0.2242          | 0.0000                 | 0.0003                 |
| PCOD8080986    | 17.23                       | 15.39                                 | 0.12                           | 1.6001                          | 0.0087               | 2.6126                          | 0.0302               | 3.0853                          | 0.0462               | 0.0331          | 0.1193          | 0.1638          | 0.0000                 | 0.0016                 |
| PCOD8242436    | 17.23                       | 15.39                                 | 0.12                           | 1.6013                          | 0.0097               | 2.6146                          | 0.0297               | 3.0785                          | 0.0523               | 0.0341          | 0.1666          | 0.1811          | 0.0000                 | 0.0006                 |
| PCOD8272108    | 17.26                       | 15.38                                 | 0.14                           | 1.5997                          | 0.0074               | 2.6121                          | 0.0342               | 3.0869                          | 0.0384               | 0.0288          | 0.1168          | 0.1202          | 0.0000                 | 0.0015                 |
| PCOD8321849    | 17.30                       | 15.21                                 | 0.06                           | 1.5993                          | 0.0075               | 2.6115                          | 0.0288               | 3.0889                          | 0.0328               | 0.0309          | 0.0845          | 0.1244          | 0.0001                 | 0.0015                 |
| PCOD8271074    | 17.30                       | 15.23                                 | 0.08                           | 1.6010                          | 0.0106               | 2.6142                          | 0.0287               | 3.0791                          | 0.0586               | 0.0504          | 0.1297          | 0.2289          | 0.0000                 | 0.0000                 |
| PCOD8330616    | 17.32                       | 15.14                                 | 0.04                           | 1.6023                          | 0.0120               | 2.6161                          | 0.0318               | 3.0725                          | 0.0558               | 0.0550          | 0.1589          | 0.2299          | 0.0000                 | 0.0006                 |
| PCOD8241081    | 17.33                       | 15.21                                 | 0.10                           | 1.6041                          | 0.0102               | 2.6192                          | 0.0282               | 3.0630                          | 0.0554               | 0.0395          | 0.1263          | 0.2378          | 0.0000                 | 0.0009                 |
| PCOD8280633    | 17.34                       | 15.19                                 | 0.09                           | 1.6018                          | 0.0072               | 2.6155                          | 0.0270               | 3.0763                          | 0.0378               | 0.0293          | 0.0786          | 0.1356          | 0.0000                 | 0.0010                 |
| PCOD8236886    | 17.34                       | 15.27                                 | 0.14                           | 1.6065                          | 0.0102               | 2.6232                          | 0.0273               | 3.0503                          | 0.0704               | 0.0302          | 0.1029          | 0.2172          | 0.0001                 | 0.0018                 |
| PCOD8209586    | 17.34                       | 15.18                                 | 0.09                           | 1.6004                          | 0.0091               | 2.6130                          | 0.0354               | 3.0827                          | 0.0546               | 0.0418          | 0.1554          | 0.1734          | 0.0002                 | 0.0006                 |
| PCOD8168221    | 17.35                       | 15.20                                 | 0.11                           | 1.6007                          | 0.0092               | 2.6134                          | 0.0362               | 3.0817                          | 0.0550               | 0.0385          | 0.1572          | 0.1727          | 0.0002                 | 0.0008                 |
| PCOD8240622    | 17.36                       | 15.27                                 | 0.17                           | 1.6022                          | 0.0114               | 2.6161                          | 0.0310               | 3.0738                          | 0.0539               | 0.0419          | 0.1215          | 0.2041          | 0.0000                 | 0.0004                 |
| PCOD8313199    | 17.37                       | 15.18                                 | 0.11                           | 1.6003                          | 0.0067               | 2.6131                          | 0.0284               | 3.0841                          | 0.0512               | 0.0200          | 0.1096          | 0.1773          | 0.0001                 | 0.0015                 |
| PCOD8330413    | 17.37                       | 15.09                                 | 0.06                           | 1.6037                          | 0.0059               | 2.6185                          | 0.0302               | 3.0657                          | 0.0379               | 0.0243          | 0.1055          | 0.1296          | 0.0001                 | 0.0002                 |
| PCOD8313976    | 17.38                       | 15.06                                 | 0.04                           | 1.6022                          | 0.0078               | 2.6161                          | 0.0309               | 3.0738                          | 0.0397               | 0.0348          | 0.1124          | 0.1577          | 0.0000                 | 0.0006                 |
| PCOD8183502    | 17.40                       | 15.05                                 | 0.06                           | 1.6041                          | 0.0083               | 2.6186                          | 0.0449               | 3.0628                          | 0.0591               | 0.0333          | 0.2287          | 0.2344          | 0.0006                 | 0.0010                 |
| PCOD8088327    | 17.42                       | 15.08                                 | 0.10                           | 1.6023                          | 0.0102               | 2.6162                          | 0.0315               | 3.0729                          | 0.0591               | 0.0419          | 0.1528          | 0.2073          | 0.0000                 | 0.0000                 |

| Structure code | FD<br>(T nm <sup>-3</sup> ) | $\Delta E$<br>(kJ mol <sup>-1</sup> ) | $\nu$<br>(T nm <sup>-3</sup> ) | $\langle D_{TO} \rangle$<br>(Å) | $\sigma_{TO}$<br>(Å) | $\langle D_{OO} \rangle$<br>(Å) | $\sigma_{OO}$<br>(Å) | $\langle D_{TT} \rangle$<br>(Å) | $\sigma_{TT}$<br>(Å) | $R_{TO}$<br>(Å) | $R_{OO}$<br>(Å) | $R_{TT}$<br>(Å) | $\epsilon_{OO}$<br>(Å) | $\epsilon_{TT}$<br>(Å) |
|----------------|-----------------------------|---------------------------------------|--------------------------------|---------------------------------|----------------------|---------------------------------|----------------------|---------------------------------|----------------------|-----------------|-----------------|-----------------|------------------------|------------------------|
| PCOD8065963    | 17.42                       | 15.06                                 | 0.08                           | 1.6037                          | 0.0105               | 2.6184                          | 0.0372               | 3.0648                          | 0.0509               | 0.0434          | 0.1511          | 0.1543          | 0.0002                 | 0.0011                 |
| PCOD8107740    | 17.43                       | 15.04                                 | 0.08                           | 1.6018                          | 0.0092               | 2.6155                          | 0.0235               | 3.0755                          | 0.0512               | 0.0390          | 0.1176          | 0.1656          | 0.0001                 | 0.0000                 |
| PCOD8179034    | 17.44                       | 15.03                                 | 0.08                           | 1.6038                          | 0.0091               | 2.6186                          | 0.0369               | 3.0641                          | 0.0589               | 0.0350          | 0.1791          | 0.2162          | 0.0001                 | 0.0013                 |
| PCOD8275742    | 17.45                       | 15.05                                 | 0.11                           | 1.6010                          | 0.0074               | 2.6142                          | 0.0245               | 3.0798                          | 0.0573               | 0.0254          | 0.1024          | 0.1947          | 0.0000                 | 0.0007                 |
| PCOD8270138    | 17.45                       | 15.02                                 | 0.09                           | 1.6031                          | 0.0071               | 2.6176                          | 0.0276               | 3.0692                          | 0.0346               | 0.0322          | 0.1124          | 0.1272          | 0.0001                 | 0.0002                 |
| PCOD8070315    | 17.47                       | 14.94                                 | 0.06                           | 1.6017                          | 0.0094               | 2.6153                          | 0.0317               | 3.0757                          | 0.0544               | 0.0419          | 0.1108          | 0.1911          | 0.0001                 | 0.0000                 |
| PCOD8318118    | 17.49                       | 14.80                                 | 0.02                           | 1.6009                          | 0.0099               | 2.6139                          | 0.0352               | 3.0800                          | 0.0515               | 0.0441          | 0.1700          | 0.1962          | 0.0001                 | 0.0005                 |
| PCOD8268116    | 17.51                       | 15.03                                 | 0.16                           | 1.6029                          | 0.0093               | 2.6172                          | 0.0316               | 3.0696                          | 0.0470               | 0.0468          | 0.1378          | 0.1785          | 0.0000                 | 0.0005                 |
| PCOD8081812    | 17.52                       | 14.90                                 | 0.07                           | 1.5998                          | 0.0096               | 2.6122                          | 0.0300               | 3.0863                          | 0.0480               | 0.0277          | 0.1025          | 0.1796          | 0.0000                 | 0.0011                 |
| PCOD8183073    | 17.53                       | 14.80                                 | 0.01                           | 1.6029                          | 0.0084               | 2.6173                          | 0.0285               | 3.0694                          | 0.0477               | 0.0491          | 0.1399          | 0.1941          | 0.0001                 | 0.0006                 |
| PCOD8285178    | 17.53                       | 14.81                                 | 0.02                           | 1.6002                          | 0.0076               | 2.6130                          | 0.0251               | 3.0836                          | 0.0502               | 0.0305          | 0.1011          | 0.1609          | 0.0001                 | 0.0006                 |
| PCOD8244280    | 17.53                       | 14.80                                 | 0.02                           | 1.5991                          | 0.0065               | 2.6111                          | 0.0321               | 3.0896                          | 0.0222               | 0.0260          | 0.1405          | 0.1154          | 0.0001                 | 0.0013                 |
| PCOD8178224    | 17.54                       | 14.92                                 | 0.11                           | 1.6026                          | 0.0057               | 2.6167                          | 0.0327               | 3.0721                          | 0.0301               | 0.0235          | 0.1259          | 0.1197          | 0.0001                 | 0.0009                 |
| PCOD8070185    | 17.61                       | 14.84                                 | 0.12                           | 1.5988                          | 0.0096               | 2.6107                          | 0.0237               | 3.0908                          | 0.0532               | 0.0315          | 0.1164          | 0.1779          | 0.0001                 | 0.0009                 |
| PCOD8086466    | 17.61                       | 14.70                                 | 0.03                           | 1.6014                          | 0.0078               | 2.6148                          | 0.0271               | 3.0777                          | 0.0408               | 0.0313          | 0.0950          | 0.1644          | 0.0000                 | 0.0004                 |
| PCOD8070992    | 17.62                       | 14.71                                 | 0.04                           | 1.6021                          | 0.0111               | 2.6160                          | 0.0280               | 3.0731                          | 0.0558               | 0.0407          | 0.1148          | 0.1876          | 0.0001                 | 0.0008                 |
| PCOD8251680    | 17.62                       | 14.82                                 | 0.12                           | 1.6023                          | 0.0103               | 2.6163                          | 0.0286               | 3.0723                          | 0.0518               | 0.0396          | 0.1209          | 0.1919          | 0.0000                 | 0.0005                 |
| PCOD8060522    | 17.62                       | 14.85                                 | 0.13                           | 1.6026                          | 0.0094               | 2.6167                          | 0.0300               | 3.0706                          | 0.0606               | 0.0399          | 0.1497          | 0.2418          | 0.0000                 | 0.0008                 |
| PCOD8166716    | 17.62                       | 15.11                                 | 0.32                           | 1.6025                          | 0.0099               | 2.6165                          | 0.0321               | 3.0717                          | 0.0566               | 0.0468          | 0.1240          | 0.1973          | 0.0000                 | 0.0003                 |
| PCOD8059969    | 17.63                       | 14.69                                 | 0.04                           | 1.6027                          | 0.0045               | 2.6168                          | 0.0310               | 3.0720                          | 0.0303               | 0.0151          | 0.1019          | 0.1001          | 0.0001                 | 0.0010                 |
| PCOD8198870    | 17.63                       | 14.87                                 | 0.16                           | 1.6011                          | 0.0065               | 2.6142                          | 0.0276               | 3.0798                          | 0.0551               | 0.0259          | 0.1078          | 0.1849          | 0.0000                 | 0.0009                 |
| PCOD8290879    | 17.64                       | 14.74                                 | 0.08                           | 1.6020                          | 0.0054               | 2.6156                          | 0.0359               | 3.0751                          | 0.0403               | 0.0229          | 0.1410          | 0.2125          | 0.0001                 | 0.0006                 |
| PCOD8257779    | 17.64                       | 14.83                                 | 0.15                           | 1.6030                          | 0.0086               | 2.6173                          | 0.0268               | 3.0698                          | 0.0561               | 0.0358          | 0.1332          | 0.2246          | 0.0000                 | 0.0002                 |
| PCOD8217837    | 17.65                       | 14.57                                 | 0.02                           | 1.6019                          | 0.0073               | 2.6158                          | 0.0193               | 3.0749                          | 0.0577               | 0.0249          | 0.1024          | 0.1881          | 0.0001                 | 0.0002                 |
| PCOD8206946    | 17.66                       | 14.64                                 | 0.03                           | 1.6030                          | 0.0085               | 2.6174                          | 0.0276               | 3.0693                          | 0.0395               | 0.0381          | 0.1025          | 0.1294          | 0.0000                 | 0.0002                 |
| PCOD8290182    | 17.68                       | 14.71                                 | 0.10                           | 1.6006                          | 0.0087               | 2.6135                          | 0.0321               | 3.0817                          | 0.0364               | 0.0361          | 0.1357          | 0.1391          | 0.0000                 | 0.0005                 |
| PCOD8198644    | 17.68                       | 14.65                                 | 0.07                           | 1.6015                          | 0.0076               | 2.6149                          | 0.0332               | 3.0772                          | 0.0547               | 0.0305          | 0.1370          | 0.2007          | 0.0001                 | 0.0003                 |
| PCOD8186345    | 17.70                       | 14.75                                 | 0.15                           | 1.6024                          | 0.0065               | 2.6163                          | 0.0366               | 3.0730                          | 0.0255               | 0.0179          | 0.1135          | 0.0662          | 0.0001                 | 0.0004                 |
| PCOD8309700    | 17.71                       | 14.53                                 | 0.00                           | 1.5994                          | 0.0064               | 2.6116                          | 0.0321               | 3.0879                          | 0.0213               | 0.0272          | 0.1539          | 0.0915          | 0.0000                 | 0.0011                 |
| PCOD8186339    | 17.71                       | 14.70                                 | 0.13                           | 1.6004                          | 0.0094               | 2.6132                          | 0.0326               | 3.0830                          | 0.0390               | 0.0376          | 0.1293          | 0.1712          | 0.0000                 | 0.0010                 |
| PCOD8179872    | 17.72                       | 14.61                                 | 0.08                           | 1.6013                          | 0.0092               | 2.6147                          | 0.0266               | 3.0780                          | 0.0444               | 0.0327          | 0.0968          | 0.1708          | 0.0001                 | 0.0003                 |



| Structure code | FD<br>(T nm <sup>-3</sup> ) | $\Delta E$<br>(kJ mol <sup>-1</sup> ) | $\nu$<br>(T nm <sup>-3</sup> ) | $\langle D_{TO} \rangle$<br>(Å) | $\sigma_{TO}$<br>(Å) | $\langle D_{OO} \rangle$<br>(Å) | $\sigma_{OO}$<br>(Å) | $\langle D_{TT} \rangle$<br>(Å) | $\sigma_{TT}$<br>(Å) | $R_{TO}$<br>(Å) | $R_{OO}$<br>(Å) | $R_{TT}$<br>(Å) | $\epsilon_{OO}$<br>(Å) | $\epsilon_{TT}$<br>(Å) |
|----------------|-----------------------------|---------------------------------------|--------------------------------|---------------------------------|----------------------|---------------------------------|----------------------|---------------------------------|----------------------|-----------------|-----------------|-----------------|------------------------|------------------------|
| PCOD8290045    | 17.73                       | 14.73                                 | 0.16                           | 1.6011                          | 0.0086               | 2.6143                          | 0.0298               | 3.0794                          | 0.0508               | 0.0316          | 0.1074          | 0.1737          | 0.0000                 | 0.0004                 |
| PCOD8087069    | 17.73                       | 14.60                                 | 0.08                           | 1.6017                          | 0.0070               | 2.6152                          | 0.0285               | 3.0768                          | 0.0360               | 0.0273          | 0.1187          | 0.1305          | 0.0000                 | 0.0008                 |
| PCOD8095286    | 17.74                       | 14.67                                 | 0.13                           | 1.6031                          | 0.0087               | 2.6176                          | 0.0257               | 3.0689                          | 0.0393               | 0.0356          | 0.1076          | 0.1355          | 0.0001                 | 0.0002                 |
| PCOD8231237    | 17.76                       | 14.55                                 | 0.08                           | 1.6016                          | 0.0080               | 2.6151                          | 0.0296               | 3.0763                          | 0.0513               | 0.0350          | 0.1510          | 0.1744          | 0.0000                 | 0.0000                 |
| PCOD8178144    | 17.77                       | 14.54                                 | 0.07                           | 1.6026                          | 0.0071               | 2.6166                          | 0.0308               | 3.0716                          | 0.0367               | 0.0347          | 0.1089          | 0.1320          | 0.0001                 | 0.0000                 |
| PCOD8088442    | 17.78                       | 14.57                                 | 0.11                           | 1.6011                          | 0.0091               | 2.6142                          | 0.0362               | 3.0794                          | 0.0379               | 0.0364          | 0.1382          | 0.1385          | 0.0001                 | 0.0007                 |
| PCOD8243411    | 17.79                       | 14.49                                 | 0.06                           | 1.6007                          | 0.0095               | 2.6136                          | 0.0327               | 3.0809                          | 0.0474               | 0.0377          | 0.1311          | 0.1551          | 0.0000                 | 0.0001                 |
| PCOD8070036    | 17.81                       | 14.47                                 | 0.07                           | 1.6031                          | 0.0071               | 2.6175                          | 0.0324               | 3.0687                          | 0.0367               | 0.0266          | 0.1329          | 0.1468          | 0.0000                 | 0.0004                 |
| PCOD8211480    | 17.81                       | 14.71                                 | 0.23                           | 1.6007                          | 0.0094               | 2.6134                          | 0.0353               | 3.0807                          | 0.0597               | 0.0454          | 0.1630          | 0.1993          | 0.0002                 | 0.0001                 |
| PCOD8240405    | 17.82                       | 14.48                                 | 0.08                           | 1.6031                          | 0.0071               | 2.6175                          | 0.0323               | 3.0686                          | 0.0367               | 0.0264          | 0.1291          | 0.1594          | 0.0000                 | 0.0004                 |
| PCOD8315377    | 17.82                       | 14.35                                 | 0.00                           | 1.5996                          | 0.0064               | 2.6118                          | 0.0324               | 3.0871                          | 0.0212               | 0.0284          | 0.1537          | 0.1066          | 0.0000                 | 0.0009                 |
| PCOD8330788    | 17.82                       | 14.43                                 | 0.05                           | 1.6029                          | 0.0052               | 2.6173                          | 0.0293               | 3.0701                          | 0.0288               | 0.0170          | 0.0903          | 0.1233          | 0.0000                 | 0.0002                 |
| PCOD8231670    | 17.83                       | 14.43                                 | 0.06                           | 1.6033                          | 0.0091               | 2.6177                          | 0.0358               | 3.0672                          | 0.0434               | 0.0364          | 0.1598          | 0.1792          | 0.0001                 | 0.0009                 |
| PCOD8294496    | 17.84                       | 14.30                                 | 0.01                           | 1.6029                          | 0.0077               | 2.6171                          | 0.0300               | 3.0693                          | 0.0579               | 0.0333          | 0.1292          | 0.2339          | 0.0002                 | 0.0004                 |
| PCOD8178875    | 17.84                       | 14.46                                 | 0.10                           | 1.6020                          | 0.0076               | 2.6158                          | 0.0272               | 3.0742                          | 0.0343               | 0.0270          | 0.1007          | 0.1225          | 0.0000                 | 0.0002                 |
| PCOD8254984    | 17.85                       | 14.41                                 | 0.07                           | 1.6025                          | 0.0091               | 2.6166                          | 0.0277               | 3.0717                          | 0.0626               | 0.0379          | 0.1234          | 0.1981          | 0.0000                 | 0.0001                 |
| PCOD8066215    | 17.85                       | 14.20                                 | 0.07                           | 1.6041                          | 0.0104               | 2.6187                          | 0.0432               | 3.0636                          | 0.0461               | 0.0389          | 0.2156          | 0.1995          | 0.0004                 | 0.0008                 |
| PCOD8086461    | 17.86                       | 14.51                                 | 0.14                           | 1.6005                          | 0.0087               | 2.6133                          | 0.0317               | 3.0822                          | 0.0469               | 0.0306          | 0.1197          | 0.1754          | 0.0000                 | 0.0005                 |
| PCOD8028858    | 17.88                       | 14.38                                 | 0.08                           | 1.6016                          | 0.0077               | 2.6152                          | 0.0297               | 3.0770                          | 0.0512               | 0.0324          | 0.1149          | 0.1838          | 0.0000                 | 0.0008                 |
| PCOD8096832    | 17.89                       | 14.39                                 | 0.10                           | 1.5999                          | 0.0075               | 2.6124                          | 0.0322               | 3.0862                          | 0.0353               | 0.0310          | 0.1061          | 0.1461          | 0.0001                 | 0.0017                 |
| PCOD8061492    | 17.91                       | 14.36                                 | 0.09                           | 1.6013                          | 0.0076               | 2.6145                          | 0.0358               | 3.0785                          | 0.0259               | 0.0306          | 0.1317          | 0.1015          | 0.0002                 | 0.0008                 |
| PCOD8074541    | 17.93                       | 14.27                                 | 0.05                           | 1.6025                          | 0.0061               | 2.6166                          | 0.0307               | 3.0718                          | 0.0432               | 0.0248          | 0.1113          | 0.1701          | 0.0001                 | 0.0003                 |
| PCOD8235604    | 17.93                       | 14.51                                 | 0.21                           | 1.6016                          | 0.0083               | 2.6148                          | 0.0395               | 3.0768                          | 0.0364               | 0.0414          | 0.1522          | 0.1480          | 0.0003                 | 0.0004                 |
| PCOD8267927    | 17.93                       | 14.22                                 | 0.02                           | 1.6009                          | 0.0087               | 2.6140                          | 0.0250               | 3.0800                          | 0.0502               | 0.0347          | 0.1137          | 0.1904          | 0.0001                 | 0.0002                 |
| PCOD8073415    | 17.94                       | 14.23                                 | 0.03                           | 1.6004                          | 0.0085               | 2.6132                          | 0.0334               | 3.0834                          | 0.0320               | 0.0320          | 0.1155          | 0.1101          | 0.0000                 | 0.0011                 |
| PCOD8198046    | 17.94                       | 14.26                                 | 0.06                           | 1.6003                          | 0.0085               | 2.6131                          | 0.0232               | 3.0828                          | 0.0536               | 0.0346          | 0.1009          | 0.1858          | 0.0001                 | 0.0001                 |
| PCOD8331133    | 17.96                       | 14.24                                 | 0.05                           | 1.6027                          | 0.0066               | 2.6168                          | 0.0283               | 3.0705                          | 0.0535               | 0.0424          | 0.1268          | 0.1997          | 0.0001                 | 0.0004                 |
| PCOD8225116    | 17.96                       | 14.22                                 | 0.04                           | 1.6021                          | 0.0079               | 2.6159                          | 0.0290               | 3.0734                          | 0.0476               | 0.0335          | 0.1008          | 0.1732          | 0.0000                 | 0.0004                 |
| PCOD8237027    | 17.96                       | 14.25                                 | 0.07                           | 1.6028                          | 0.0050               | 2.6171                          | 0.0342               | 3.0708                          | 0.0245               | 0.0156          | 0.1077          | 0.1110          | 0.0001                 | 0.0006                 |
| PCOD8070936    | 17.96                       | 14.22                                 | 0.05                           | 1.6021                          | 0.0085               | 2.6159                          | 0.0291               | 3.0735                          | 0.0445               | 0.0308          | 0.1380          | 0.1513          | 0.0001                 | 0.0003                 |
| PCOD8315376    | 17.98                       | 14.05                                 | 0.04                           | 1.5998                          | 0.0063               | 2.6121                          | 0.0327               | 3.0860                          | 0.0210               | 0.0294          | 0.1548          | 0.1113          | 0.0000                 | 0.0007                 |

| Structure code | FD<br>(T nm <sup>-3</sup> ) | $\Delta E$<br>(kJ mol <sup>-1</sup> ) | $\nu$<br>(T nm <sup>-3</sup> ) | $\langle D_{TO} \rangle$<br>(Å) | $\sigma_{TO}$<br>(Å) | $\langle D_{OO} \rangle$<br>(Å) | $\sigma_{OO}$<br>(Å) | $\langle D_{TT} \rangle$<br>(Å) | $\sigma_{TT}$<br>(Å) | $R_{TO}$<br>(Å) | $R_{OO}$<br>(Å) | $R_{TT}$<br>(Å) | $\epsilon_{OO}$<br>(Å) | $\epsilon_{TT}$<br>(Å) |
|----------------|-----------------------------|---------------------------------------|--------------------------------|---------------------------------|----------------------|---------------------------------|----------------------|---------------------------------|----------------------|-----------------|-----------------|-----------------|------------------------|------------------------|
| PCOD8095289    | 18.01                       | 14.13                                 | 0.03                           | 1.6026                          | 0.0089               | 2.6168                          | 0.0281               | 3.0709                          | 0.0357               | 0.0371          | 0.1083          | 0.1480          | 0.0001                 | 0.0008                 |
| PCOD8209245    | 18.01                       | 14.23                                 | 0.11                           | 1.6015                          | 0.0090               | 2.6150                          | 0.0313               | 3.0763                          | 0.0528               | 0.0389          | 0.1330          | 0.2134          | 0.0000                 | 0.0004                 |
| PCOD8188707    | 18.02                       | 14.16                                 | 0.07                           | 1.6043                          | 0.0067               | 2.6197                          | 0.0228               | 3.0625                          | 0.0411               | 0.0243          | 0.0849          | 0.1186          | 0.0001                 | 0.0004                 |
| PCOD8307665    | 18.02                       | 14.15                                 | 0.06                           | 1.6009                          | 0.0061               | 2.6140                          | 0.0341               | 3.0807                          | 0.0310               | 0.0212          | 0.1059          | 0.0795          | 0.0000                 | 0.0011                 |
| PCOD8279136    | 18.05                       | 14.12                                 | 0.07                           | 1.6009                          | 0.0075               | 2.6140                          | 0.0304               | 3.0800                          | 0.0449               | 0.0304          | 0.1166          | 0.1741          | 0.0001                 | 0.0004                 |
| PCOD8243507    | 18.07                       | 14.01                                 | 0.01                           | 1.5999                          | 0.0087               | 2.6123                          | 0.0279               | 3.0848                          | 0.0501               | 0.0308          | 0.1295          | 0.1822          | 0.0000                 | 0.0001                 |
| PCOD8179173    | 18.08                       | 14.05                                 | 0.05                           | 1.6018                          | 0.0064               | 2.6156                          | 0.0282               | 3.0754                          | 0.0343               | 0.0267          | 0.0989          | 0.1071          | 0.0001                 | 0.0003                 |
| PCOD8063144    | 18.08                       | 14.05                                 | 0.06                           | 1.6008                          | 0.0075               | 2.6139                          | 0.0264               | 3.0799                          | 0.0404               | 0.0294          | 0.1019          | 0.1519          | 0.0001                 | 0.0001                 |
| PCOD8257777    | 18.09                       | 14.04                                 | 0.05                           | 1.6043                          | 0.0089               | 2.6196                          | 0.0277               | 3.0616                          | 0.0517               | 0.0293          | 0.1100          | 0.1847          | 0.0001                 | 0.0015                 |
| PCOD8063232    | 18.12                       | 14.02                                 | 0.08                           | 1.6014                          | 0.0082               | 2.6148                          | 0.0248               | 3.0772                          | 0.0319               | 0.0335          | 0.1099          | 0.1187          | 0.0001                 | 0.0003                 |
| PCOD8103956    | 18.13                       | 13.91                                 | 0.00                           | 1.6029                          | 0.0089               | 2.6172                          | 0.0328               | 3.0694                          | 0.0448               | 0.0394          | 0.1367          | 0.1970          | 0.0001                 | 0.0005                 |
| PCOD8213046    | 18.15                       | 13.92                                 | 0.03                           | 1.6009                          | 0.0098               | 2.6141                          | 0.0247               | 3.0796                          | 0.0441               | 0.0350          | 0.1013          | 0.1678          | 0.0001                 | 0.0004                 |
| PCOD8182998    | 18.16                       | 13.94                                 | 0.06                           | 1.6020                          | 0.0099               | 2.6158                          | 0.0271               | 3.0737                          | 0.0450               | 0.0425          | 0.1335          | 0.1526          | 0.0001                 | 0.0008                 |
| PCOD8320305    | 18.17                       | 13.93                                 | 0.06                           | 1.6029                          | 0.0085               | 2.6172                          | 0.0277               | 3.0689                          | 0.0490               | 0.0371          | 0.1217          | 0.1949          | 0.0000                 | 0.0011                 |
| PCOD8243020    | 18.17                       | 13.99                                 | 0.10                           | 1.6016                          | 0.0074               | 2.6151                          | 0.0291               | 3.0760                          | 0.0517               | 0.0294          | 0.1298          | 0.1849          | 0.0000                 | 0.0005                 |
| PCOD8219153    | 18.17                       | 13.93                                 | 0.06                           | 1.6010                          | 0.0100               | 2.6139                          | 0.0334               | 3.0795                          | 0.0406               | 0.0367          | 0.1494          | 0.1646          | 0.0002                 | 0.0000                 |
| PCOD8088115    | 18.18                       | 13.94                                 | 0.07                           | 1.6009                          | 0.0082               | 2.6139                          | 0.0321               | 3.0801                          | 0.0348               | 0.0373          | 0.1405          | 0.1529          | 0.0001                 | 0.0005                 |
| PCOD8189533    | 18.20                       | 13.83                                 | 0.02                           | 1.5993                          | 0.0084               | 2.6113                          | 0.0338               | 3.0885                          | 0.0332               | 0.0287          | 0.1260          | 0.1128          | 0.0000                 | 0.0010                 |
| PCOD8073438    | 18.21                       | 13.86                                 | 0.05                           | 1.5994                          | 0.0090               | 2.6116                          | 0.0329               | 3.0881                          | 0.0356               | 0.0327          | 0.1170          | 0.1285          | 0.0000                 | 0.0011                 |
| PCOD8225131    | 18.21                       | 13.82                                 | 0.02                           | 1.6021                          | 0.0100               | 2.6159                          | 0.0311               | 3.0738                          | 0.0378               | 0.0358          | 0.1239          | 0.1456          | 0.0000                 | 0.0002                 |
| PCOD8209392    | 18.22                       | 14.06                                 | 0.20                           | 1.6001                          | 0.0104               | 2.6126                          | 0.0347               | 3.0832                          | 0.0506               | 0.0464          | 0.1573          | 0.1974          | 0.0001                 | 0.0004                 |
| PCOD8258339    | 18.23                       | 13.84                                 | 0.06                           | 1.6012                          | 0.0070               | 2.6146                          | 0.0293               | 3.0785                          | 0.0309               | 0.0255          | 0.1118          | 0.1007          | 0.0001                 | 0.0003                 |
| PCOD8099688    | 18.23                       | 13.78                                 | 0.02                           | 1.6020                          | 0.0087               | 2.6158                          | 0.0258               | 3.0736                          | 0.0569               | 0.0318          | 0.1143          | 0.1888          | 0.0000                 | 0.0007                 |
| PCOD8262315    | 18.24                       | 13.86                                 | 0.08                           | 1.6031                          | 0.0088               | 2.6176                          | 0.0297               | 3.0681                          | 0.0387               | 0.0322          | 0.1167          | 0.1474          | 0.0000                 | 0.0008                 |
| PCOD8072345    | 18.24                       | 13.86                                 | 0.09                           | 1.5999                          | 0.0082               | 2.6122                          | 0.0313               | 3.0854                          | 0.0450               | 0.0339          | 0.1166          | 0.1616          | 0.0001                 | 0.0005                 |
| PCOD8209934    | 18.24                       | 13.88                                 | 0.10                           | 1.6003                          | 0.0088               | 2.6130                          | 0.0287               | 3.0826                          | 0.0497               | 0.0376          | 0.1294          | 0.1794          | 0.0001                 | 0.0000                 |
| PCOD8110532    | 18.25                       | 13.79                                 | 0.05                           | 1.6021                          | 0.0066               | 2.6159                          | 0.0313               | 3.0738                          | 0.0471               | 0.0308          | 0.1363          | 0.1977          | 0.0000                 | 0.0002                 |
| PCOD8243266    | 18.25                       | 13.87                                 | 0.10                           | 1.6012                          | 0.0067               | 2.6144                          | 0.0330               | 3.0790                          | 0.0248               | 0.0297          | 0.1053          | 0.0761          | 0.0000                 | 0.0007                 |
| PCOD8073440    | 18.26                       | 13.85                                 | 0.09                           | 1.5991                          | 0.0092               | 2.6110                          | 0.0320               | 3.0897                          | 0.0359               | 0.0364          | 0.1124          | 0.1353          | 0.0000                 | 0.0010                 |
| PCOD8098327    | 18.28                       | 13.78                                 | 0.07                           | 1.6014                          | 0.0077               | 2.6147                          | 0.0355               | 3.0777                          | 0.0297               | 0.0335          | 0.1363          | 0.1112          | 0.0000                 | 0.0003                 |
| PCOD8210062    | 18.28                       | 13.83                                 | 0.11                           | 1.6006                          | 0.0090               | 2.6134                          | 0.0325               | 3.0811                          | 0.0484               | 0.0374          | 0.1361          | 0.1921          | 0.0001                 | 0.0003                 |

| Structure code | FD<br>(T nm <sup>-3</sup> ) | $\Delta E$<br>(kJ mol <sup>-1</sup> ) | $\nu$<br>(T nm <sup>-3</sup> ) | $\langle D_{TO} \rangle$<br>(Å) | $\sigma_{TO}$<br>(Å) | $\langle D_{OO} \rangle$<br>(Å) | $\sigma_{OO}$<br>(Å) | $\langle D_{TT} \rangle$<br>(Å) | $\sigma_{TT}$<br>(Å) | $R_{TO}$<br>(Å) | $R_{OO}$<br>(Å) | $R_{TT}$<br>(Å) | $\epsilon_{OO}$<br>(Å) | $\epsilon_{TT}$<br>(Å) |
|----------------|-----------------------------|---------------------------------------|--------------------------------|---------------------------------|----------------------|---------------------------------|----------------------|---------------------------------|----------------------|-----------------|-----------------|-----------------|------------------------|------------------------|
| PCOD8325566    | 18.31                       | 13.75                                 | 0.07                           | 1.6017                          | 0.0095               | 2.6151                          | 0.0391               | 3.0753                          | 0.0461               | 0.0334          | 0.1453          | 0.1495          | 0.0001                 | 0.0005                 |
| PCOD8073500    | 18.32                       | 13.73                                 | 0.07                           | 1.5997                          | 0.0085               | 2.6120                          | 0.0345               | 3.0862                          | 0.0326               | 0.0302          | 0.1269          | 0.1019          | 0.0000                 | 0.0007                 |
| PCOD8300086    | 18.33                       | 13.90                                 | 0.20                           | 1.6011                          | 0.0086               | 2.6141                          | 0.0359               | 3.0789                          | 0.0407               | 0.0319          | 0.1891          | 0.1637          | 0.0001                 | 0.0000                 |
| PCOD8273328    | 18.34                       | 13.70                                 | 0.07                           | 1.6007                          | 0.0090               | 2.6138                          | 0.0249               | 3.0799                          | 0.0459               | 0.0408          | 0.1074          | 0.1590          | 0.0001                 | 0.0006                 |
| PCOD8273359    | 18.34                       | 13.73                                 | 0.09                           | 1.6014                          | 0.0103               | 2.6147                          | 0.0278               | 3.0765                          | 0.0484               | 0.0525          | 0.1312          | 0.2021          | 0.0000                 | 0.0009                 |
| PCOD8073258    | 18.35                       | 13.65                                 | 0.05                           | 1.6025                          | 0.0072               | 2.6166                          | 0.0306               | 3.0720                          | 0.0359               | 0.0289          | 0.1382          | 0.1315          | 0.0000                 | 0.0000                 |
| PCOD8242749    | 18.36                       | 13.68                                 | 0.07                           | 1.6007                          | 0.0062               | 2.6137                          | 0.0289               | 3.0807                          | 0.0325               | 0.0277          | 0.1329          | 0.1400          | 0.0001                 | 0.0001                 |
| PCOD8276325    | 18.36                       | 13.59                                 | 0.02                           | 1.6010                          | 0.0082               | 2.6141                          | 0.0328               | 3.0785                          | 0.0453               | 0.0330          | 0.1251          | 0.1910          | 0.0001                 | 0.0006                 |
| PCOD8052423    | 18.38                       | 13.69                                 | 0.11                           | 1.5988                          | 0.0087               | 2.6106                          | 0.0308               | 3.0907                          | 0.0324               | 0.0316          | 0.1107          | 0.1058          | 0.0000                 | 0.0009                 |
| PCOD8166818    | 18.38                       | 13.61                                 | 0.05                           | 1.5993                          | 0.0080               | 2.6114                          | 0.0319               | 3.0882                          | 0.0302               | 0.0307          | 0.1193          | 0.1049          | 0.0000                 | 0.0008                 |
| PCOD8319635    | 18.39                       | 13.69                                 | 0.12                           | 1.6004                          | 0.0077               | 2.6130                          | 0.0340               | 3.0822                          | 0.0265               | 0.0437          | 0.1497          | 0.1106          | 0.0001                 | 0.0000                 |
| PCOD8236328    | 18.40                       | 13.64                                 | 0.09                           | 1.5995                          | 0.0096               | 2.6115                          | 0.0352               | 3.0871                          | 0.0376               | 0.0398          | 0.1464          | 0.1309          | 0.0001                 | 0.0003                 |
| PCOD8211717    | 18.41                       | 13.56                                 | 0.05                           | 1.6014                          | 0.0070               | 2.6147                          | 0.0292               | 3.0776                          | 0.0305               | 0.0314          | 0.1269          | 0.1331          | 0.0000                 | 0.0001                 |
| PCOD8186416    | 18.41                       | 13.69                                 | 0.14                           | 1.5995                          | 0.0104               | 2.6115                          | 0.0357               | 3.0868                          | 0.0496               | 0.0394          | 0.1606          | 0.1921          | 0.0002                 | 0.0000                 |
| PCOD8232428    | 18.44                       | 13.60                                 | 0.10                           | 1.6021                          | 0.0060               | 2.6159                          | 0.0309               | 3.0743                          | 0.0250               | 0.0249          | 0.1222          | 0.0807          | 0.0000                 | 0.0003                 |
| PCOD8074064    | 18.45                       | 13.54                                 | 0.07                           | 1.6000                          | 0.0090               | 2.6126                          | 0.0313               | 3.0845                          | 0.0341               | 0.0287          | 0.1133          | 0.1154          | 0.0000                 | 0.0005                 |
| PCOD8073543    | 18.46                       | 13.50                                 | 0.05                           | 1.6007                          | 0.0091               | 2.6137                          | 0.0303               | 3.0804                          | 0.0424               | 0.0297          | 0.1125          | 0.1628          | 0.0001                 | 0.0004                 |
| PCOD8090218    | 18.47                       | 13.51                                 | 0.07                           | 1.6002                          | 0.0086               | 2.6128                          | 0.0293               | 3.0831                          | 0.0482               | 0.0396          | 0.1607          | 0.2075          | 0.0000                 | 0.0001                 |
| PCOD8300489    | 18.47                       | 13.61                                 | 0.14                           | 1.5989                          | 0.0100               | 2.6107                          | 0.0308               | 3.0901                          | 0.0387               | 0.0450          | 0.1329          | 0.1588          | 0.0000                 | 0.0006                 |
| PCOD8098002    | 18.48                       | 13.43                                 | 0.03                           | 1.5985                          | 0.0087               | 2.6102                          | 0.0251               | 3.0914                          | 0.0310               | 0.0271          | 0.1114          | 0.1156          | 0.0001                 | 0.0001                 |
| PCOD8183105    | 18.48                       | 13.55                                 | 0.11                           | 1.6027                          | 0.0070               | 2.6171                          | 0.0255               | 3.0698                          | 0.0486               | 0.0303          | 0.1064          | 0.1849          | 0.0001                 | 0.0009                 |
| PCOD8087731    | 18.52                       | 13.47                                 | 0.09                           | 1.6028                          | 0.0069               | 2.6171                          | 0.0225               | 3.0697                          | 0.0406               | 0.0242          | 0.0965          | 0.1542          | 0.0001                 | 0.0009                 |
| PCOD8326815    | 18.53                       | 13.10                                 | 0.15                           | 1.5990                          | 0.0089               | 2.6109                          | 0.0246               | 3.0881                          | 0.0458               | 0.0462          | 0.1314          | 0.2202          | 0.0000                 | 0.0010                 |
| PCOD8262847    | 18.53                       | 13.87                                 | 0.38                           | 1.6007                          | 0.0069               | 2.6135                          | 0.0337               | 3.0815                          | 0.0327               | 0.0278          | 0.1299          | 0.1449          | 0.0001                 | 0.0008                 |
| PCOD8241793    | 18.55                       | 13.36                                 | 0.04                           | 1.6010                          | 0.0068               | 2.6141                          | 0.0281               | 3.0797                          | 0.0338               | 0.0244          | 0.1096          | 0.1210          | 0.0000                 | 0.0002                 |
| PCOD8182952    | 18.55                       | 13.45                                 | 0.11                           | 1.6038                          | 0.0081               | 2.6189                          | 0.0259               | 3.0637                          | 0.0379               | 0.0291          | 0.0970          | 0.1584          | 0.0001                 | 0.0017                 |
| PCOD8106072    | 18.56                       | 13.36                                 | 0.05                           | 1.5998                          | 0.0086               | 2.6122                          | 0.0289               | 3.0855                          | 0.0305               | 0.0306          | 0.1197          | 0.1185          | 0.0001                 | 0.0003                 |
| PCOD8225456    | 18.56                       | 13.36                                 | 0.06                           | 1.6005                          | 0.0095               | 2.6133                          | 0.0310               | 3.0818                          | 0.0427               | 0.0334          | 0.1340          | 0.1387          | 0.0000                 | 0.0001                 |
| PCOD8259991    | 18.58                       | 13.62                                 | 0.26                           | 1.6017                          | 0.0060               | 2.6153                          | 0.0300               | 3.0760                          | 0.0292               | 0.0250          | 0.1047          | 0.1092          | 0.0000                 | 0.0003                 |
| PCOD8290468    | 18.58                       | 13.33                                 | 0.06                           | 1.6015                          | 0.0070               | 2.6149                          | 0.0263               | 3.0764                          | 0.0438               | 0.0303          | 0.1005          | 0.1871          | 0.0000                 | 0.0004                 |
| PCOD8243564    | 18.59                       | 13.35                                 | 0.08                           | 1.6017                          | 0.0073               | 2.6153                          | 0.0264               | 3.0753                          | 0.0445               | 0.0278          | 0.0980          | 0.1478          | 0.0001                 | 0.0006                 |

| Structure code | FD<br>(T nm <sup>-3</sup> ) | $\Delta E$<br>(kJ mol <sup>-1</sup> ) | $\nu$<br>(T nm <sup>-3</sup> ) | $\langle D_{TO} \rangle$<br>(Å) | $\sigma_{TO}$<br>(Å) | $\langle D_{OO} \rangle$<br>(Å) | $\sigma_{OO}$<br>(Å) | $\langle D_{TT} \rangle$<br>(Å) | $\sigma_{TT}$<br>(Å) | $R_{TO}$<br>(Å) | $R_{OO}$<br>(Å) | $R_{TT}$<br>(Å) | $\epsilon_{OO}$<br>(Å) | $\epsilon_{TT}$<br>(Å) |
|----------------|-----------------------------|---------------------------------------|--------------------------------|---------------------------------|----------------------|---------------------------------|----------------------|---------------------------------|----------------------|-----------------|-----------------|-----------------|------------------------|------------------------|
| PCOD8246643    | 18.60                       | 13.29                                 | 0.05                           | 1.6016                          | 0.0097               | 2.6151                          | 0.0277               | 3.0761                          | 0.0357               | 0.0322          | 0.0917          | 0.1357          | 0.0001                 | 0.0004                 |
| PCOD8258969    | 18.62                       | 13.37                                 | 0.13                           | 1.5997                          | 0.0082               | 2.6120                          | 0.0269               | 3.0856                          | 0.0314               | 0.0319          | 0.1138          | 0.1143          | 0.0001                 | 0.0002                 |
| PCOD8325644    | 18.63                       | 13.21                                 | 0.02                           | 1.6004                          | 0.0102               | 2.6132                          | 0.0319               | 3.0810                          | 0.0406               | 0.0360          | 0.1477          | 0.1443          | 0.0000                 | 0.0010                 |
| PCOD8088193    | 18.63                       | 13.46                                 | 0.19                           | 1.6002                          | 0.0076               | 2.6129                          | 0.0254               | 3.0829                          | 0.0520               | 0.0277          | 0.1167          | 0.1784          | 0.0000                 | 0.0001                 |
| PCOD8211701    | 18.64                       | 13.24                                 | 0.06                           | 1.6012                          | 0.0091               | 2.6144                          | 0.0290               | 3.0770                          | 0.0512               | 0.0530          | 0.1359          | 0.2095          | 0.0001                 | 0.0012                 |
| PCOD8219945    | 18.65                       | 13.40                                 | 0.18                           | 1.6011                          | 0.0090               | 2.6142                          | 0.0302               | 3.0788                          | 0.0457               | 0.0409          | 0.1486          | 0.1725          | 0.0000                 | 0.0000                 |
| PCOD8327844    | 18.65                       | 13.26                                 | 0.08                           | 1.6021                          | 0.0054               | 2.6160                          | 0.0249               | 3.0733                          | 0.0339               | 0.0211          | 0.0770          | 0.0999          | 0.0001                 | 0.0007                 |
| PCOD8198832    | 18.66                       | 13.27                                 | 0.10                           | 1.5990                          | 0.0089               | 2.6109                          | 0.0325               | 3.0895                          | 0.0365               | 0.0316          | 0.1178          | 0.1330          | 0.0000                 | 0.0003                 |
| PCOD8097783    | 18.67                       | 13.15                                 | 0.02                           | 1.6004                          | 0.0070               | 2.6131                          | 0.0351               | 3.0828                          | 0.0341               | 0.0337          | 0.1285          | 0.1507          | 0.0001                 | 0.0007                 |
| PCOD8072054    | 18.70                       | 13.23                                 | 0.11                           | 1.5994                          | 0.0086               | 2.6115                          | 0.0336               | 3.0872                          | 0.0353               | 0.0377          | 0.1512          | 0.1288          | 0.0001                 | 0.0003                 |
| PCOD8088719    | 18.73                       | 13.18                                 | 0.10                           | 1.6015                          | 0.0091               | 2.6149                          | 0.0292               | 3.0765                          | 0.0467               | 0.0430          | 0.1083          | 0.1912          | 0.0001                 | 0.0005                 |
| PCOD8259023    | 18.73                       | 13.17                                 | 0.10                           | 1.5994                          | 0.0082               | 2.6115                          | 0.0312               | 3.0872                          | 0.0524               | 0.0287          | 0.1138          | 0.1707          | 0.0001                 | 0.0002                 |
| PCOD8173427    | 18.73                       | 13.14                                 | 0.08                           | 1.5996                          | 0.0076               | 2.6118                          | 0.0354               | 3.0866                          | 0.0390               | 0.0312          | 0.1365          | 0.1440          | 0.0001                 | 0.0004                 |
| PCOD8259711    | 18.73                       | 13.10                                 | 0.05                           | 1.5998                          | 0.0102               | 2.6121                          | 0.0334               | 3.0842                          | 0.0426               | 0.0443          | 0.1775          | 0.1636          | 0.0001                 | 0.0008                 |
| PCOD8189576    | 18.74                       | 13.01                                 | 0.00                           | 1.5991                          | 0.0086               | 2.6110                          | 0.0313               | 3.0888                          | 0.0493               | 0.0302          | 0.1128          | 0.1422          | 0.0001                 | 0.0004                 |
| PCOD8092706    | 18.75                       | 13.02                                 | 0.02                           | 1.6001                          | 0.0097               | 2.6126                          | 0.0310               | 3.0834                          | 0.0459               | 0.0352          | 0.1340          | 0.1407          | 0.0001                 | 0.0004                 |
| PCOD8103054    | 18.80                       | 13.13                                 | 0.13                           | 1.6008                          | 0.0097               | 2.6138                          | 0.0310               | 3.0792                          | 0.0477               | 0.0426          | 0.1338          | 0.1793          | 0.0000                 | 0.0011                 |
| PCOD8065409    | 18.81                       | 12.99                                 | 0.05                           | 1.5994                          | 0.0085               | 2.6115                          | 0.0283               | 3.0873                          | 0.0379               | 0.0380          | 0.1254          | 0.1395          | 0.0000                 | 0.0004                 |
| PCOD8232239    | 18.82                       | 12.58                                 | 0.21                           | 1.6012                          | 0.0072               | 2.6145                          | 0.0297               | 3.0774                          | 0.0312               | 0.0318          | 0.1379          | 0.1173          | 0.0000                 | 0.0008                 |
| PCOD8064289    | 18.84                       | 12.94                                 | 0.05                           | 1.6015                          | 0.0099               | 2.6148                          | 0.0315               | 3.0755                          | 0.0496               | 0.0331          | 0.1416          | 0.1958          | 0.0001                 | 0.0013                 |
| PCOD8099355    | 18.84                       | 13.00                                 | 0.09                           | 1.5989                          | 0.0087               | 2.6106                          | 0.0338               | 3.0901                          | 0.0334               | 0.0328          | 0.1336          | 0.1076          | 0.0001                 | 0.0004                 |
| PCOD8074749    | 18.84                       | 13.05                                 | 0.13                           | 1.5991                          | 0.0096               | 2.6109                          | 0.0330               | 3.0889                          | 0.0490               | 0.0391          | 0.1252          | 0.1955          | 0.0001                 | 0.0004                 |
| PCOD8243691    | 18.86                       | 12.85                                 | 0.01                           | 1.5997                          | 0.0084               | 2.6119                          | 0.0315               | 3.0856                          | 0.0386               | 0.0376          | 0.1413          | 0.1605          | 0.0001                 | 0.0003                 |
| PCOD8263681    | 18.86                       | 13.07                                 | 0.17                           | 1.6019                          | 0.0098               | 2.6156                          | 0.0296               | 3.0734                          | 0.0512               | 0.0400          | 0.1239          | 0.1956          | 0.0000                 | 0.0015                 |
| PCOD8260013    | 18.88                       | 12.82                                 | 0.01                           | 1.5987                          | 0.0084               | 2.6104                          | 0.0311               | 3.0908                          | 0.0319               | 0.0298          | 0.1012          | 0.0982          | 0.0000                 | 0.0003                 |
| PCOD8073501    | 18.89                       | 13.12                                 | 0.23                           | 1.6007                          | 0.0075               | 2.6135                          | 0.0325               | 3.0806                          | 0.0310               | 0.0365          | 0.1332          | 0.1121          | 0.0001                 | 0.0000                 |
| PCOD8219361    | 18.91                       | 12.83                                 | 0.04                           | 1.6009                          | 0.0090               | 2.6140                          | 0.0298               | 3.0789                          | 0.0411               | 0.0429          | 0.1056          | 0.1708          | 0.0000                 | 0.0007                 |
| PCOD8213334    | 18.92                       | 13.19                                 | 0.30                           | 1.6004                          | 0.0083               | 2.6130                          | 0.0316               | 3.0824                          | 0.0369               | 0.0333          | 0.1151          | 0.1257          | 0.0001                 | 0.0001                 |
| PCOD8075380    | 18.92                       | 12.93                                 | 0.13                           | 1.5985                          | 0.0084               | 2.6101                          | 0.0312               | 3.0917                          | 0.0378               | 0.0358          | 0.1456          | 0.1373          | 0.0000                 | 0.0003                 |
| PCOD8259425    | 18.93                       | 12.84                                 | 0.08                           | 1.6006                          | 0.0095               | 2.6135                          | 0.0274               | 3.0801                          | 0.0467               | 0.0464          | 0.1144          | 0.1804          | 0.0000                 | 0.0011                 |
| PCOD8189960    | 18.94                       | 12.78                                 | 0.04                           | 1.6008                          | 0.0081               | 2.6139                          | 0.0235               | 3.0796                          | 0.0264               | 0.0271          | 0.0965          | 0.0803          | 0.0001                 | 0.0006                 |

| Structure code | FD<br>(T nm <sup>-3</sup> ) | $\Delta E$<br>(kJ mol <sup>-1</sup> ) | $\nu$<br>(T nm <sup>-3</sup> ) | $\langle D_{TO} \rangle$<br>(Å) | $\sigma_{TO}$<br>(Å) | $\langle D_{OO} \rangle$<br>(Å) | $\sigma_{OO}$<br>(Å) | $\langle D_{TT} \rangle$<br>(Å) | $\sigma_{TT}$<br>(Å) | $R_{TO}$<br>(Å) | $R_{OO}$<br>(Å) | $R_{TT}$<br>(Å) | $\epsilon_{OO}$<br>(Å) | $\epsilon_{TT}$<br>(Å) |
|----------------|-----------------------------|---------------------------------------|--------------------------------|---------------------------------|----------------------|---------------------------------|----------------------|---------------------------------|----------------------|-----------------|-----------------|-----------------|------------------------|------------------------|
| PCOD8252799    | 18.94                       | 12.71                                 | 0.01                           | 1.6017                          | 0.0071               | 2.6153                          | 0.0301               | 3.0754                          | 0.0308               | 0.0279          | 0.1156          | 0.1047          | 0.0000                 | 0.0003                 |
| PCOD8103186    | 18.95                       | 12.80                                 | 0.07                           | 1.6001                          | 0.0080               | 2.6127                          | 0.0278               | 3.0834                          | 0.0448               | 0.0295          | 0.1191          | 0.1666          | 0.0000                 | 0.0002                 |
| PCOD8141547    | 18.95                       | 12.42                                 | 0.19                           | 1.6029                          | 0.0087               | 2.6169                          | 0.0370               | 3.0680                          | 0.0543               | 0.0417          | 0.1665          | 0.1896          | 0.0003                 | 0.0019                 |
| PCOD8064489    | 18.95                       | 12.80                                 | 0.07                           | 1.6001                          | 0.0080               | 2.6127                          | 0.0285               | 3.0833                          | 0.0373               | 0.0328          | 0.1160          | 0.1317          | 0.0000                 | 0.0003                 |
| PCOD8159596    | 18.96                       | 12.75                                 | 0.04                           | 1.6019                          | 0.0086               | 2.6155                          | 0.0348               | 3.0739                          | 0.0372               | 0.0342          | 0.1360          | 0.1328          | 0.0002                 | 0.0008                 |
| PCOD8264773    | 18.97                       | 12.76                                 | 0.05                           | 1.5987                          | 0.0073               | 2.6104                          | 0.0327               | 3.0909                          | 0.0455               | 0.0276          | 0.1338          | 0.1619          | 0.0000                 | 0.0002                 |
| PCOD8245244    | 18.98                       | 12.71                                 | 0.03                           | 1.5987                          | 0.0090               | 2.6104                          | 0.0315               | 3.0905                          | 0.0372               | 0.0351          | 0.1043          | 0.1355          | 0.0000                 | 0.0001                 |
| PCOD8104545    | 19.01                       | 12.68                                 | 0.05                           | 1.5991                          | 0.0087               | 2.6111                          | 0.0304               | 3.0883                          | 0.0297               | 0.0372          | 0.1174          | 0.1126          | 0.0000                 | 0.0000                 |
| PCOD8101405    | 19.01                       | 12.67                                 | 0.04                           | 1.6027                          | 0.0066               | 2.6169                          | 0.0226               | 3.0698                          | 0.0431               | 0.0264          | 0.0843          | 0.1474          | 0.0001                 | 0.0012                 |
| PCOD8232833    | 19.02                       | 12.64                                 | 0.02                           | 1.5992                          | 0.0097               | 2.6112                          | 0.0321               | 3.0879                          | 0.0373               | 0.0316          | 0.1241          | 0.1239          | 0.0000                 | 0.0003                 |
| PCOD8238549    | 19.02                       | 12.64                                 | 0.02                           | 1.6008                          | 0.0059               | 2.6138                          | 0.0262               | 3.0793                          | 0.0456               | 0.0212          | 0.0961          | 0.1304          | 0.0000                 | 0.0011                 |
| PCOD8223545    | 19.04                       | 12.90                                 | 0.23                           | 1.5994                          | 0.0082               | 2.6113                          | 0.0381               | 3.0864                          | 0.0434               | 0.0318          | 0.2148          | 0.1862          | 0.0003                 | 0.0006                 |
| PCOD8308701    | 19.08                       | 12.56                                 | 0.02                           | 1.6027                          | 0.0067               | 2.6169                          | 0.0261               | 3.0702                          | 0.0284               | 0.0209          | 0.0832          | 0.0841          | 0.0000                 | 0.0009                 |
| PCOD8175779    | 19.08                       | 12.53                                 | 0.01                           | 1.5995                          | 0.0075               | 2.6116                          | 0.0325               | 3.0867                          | 0.0254               | 0.0301          | 0.1215          | 0.1086          | 0.0000                 | 0.0001                 |
| PCOD8167566    | 19.09                       | 12.52                                 | 0.02                           | 1.5993                          | 0.0063               | 2.6114                          | 0.0320               | 3.0876                          | 0.0197               | 0.0239          | 0.1103          | 0.0762          | 0.0000                 | 0.0000                 |
| PCOD8166844    | 19.10                       | 12.56                                 | 0.05                           | 1.5993                          | 0.0063               | 2.6115                          | 0.0317               | 3.0874                          | 0.0201               | 0.0246          | 0.1090          | 0.0764          | 0.0000                 | 0.0000                 |
| PCOD8273381    | 19.10                       | 12.60                                 | 0.08                           | 1.5994                          | 0.0073               | 2.6115                          | 0.0308               | 3.0872                          | 0.0396               | 0.0247          | 0.1137          | 0.1455          | 0.0000                 | 0.0001                 |
| PCOD8099864    | 19.11                       | 12.57                                 | 0.07                           | 1.6021                          | 0.0061               | 2.6158                          | 0.0326               | 3.0733                          | 0.0292               | 0.0224          | 0.1461          | 0.1269          | 0.0001                 | 0.0006                 |
| PCOD8073265    | 19.13                       | 12.58                                 | 0.09                           | 1.6005                          | 0.0089               | 2.6134                          | 0.0271               | 3.0807                          | 0.0514               | 0.0411          | 0.1186          | 0.1747          | 0.0000                 | 0.0009                 |
| PCOD8102090    | 19.14                       | 12.60                                 | 0.12                           | 1.5999                          | 0.0088               | 2.6123                          | 0.0348               | 3.0841                          | 0.0382               | 0.0386          | 0.1652          | 0.1562          | 0.0001                 | 0.0004                 |
| PCOD8142649    | 19.14                       | 12.47                                 | 0.03                           | 1.6014                          | 0.0088               | 2.6146                          | 0.0354               | 3.0762                          | 0.0441               | 0.0338          | 0.1523          | 0.1592          | 0.0002                 | 0.0011                 |
| PCOD8280240    | 19.15                       | 12.69                                 | 0.19                           | 1.6014                          | 0.0099               | 2.6148                          | 0.0291               | 3.0758                          | 0.0440               | 0.0417          | 0.1472          | 0.1932          | 0.0000                 | 0.0013                 |
| PCOD8049981    | 19.15                       | 12.46                                 | 0.04                           | 1.6015                          | 0.0087               | 2.6148                          | 0.0355               | 3.0758                          | 0.0434               | 0.0327          | 0.1571          | 0.1620          | 0.0002                 | 0.0011                 |
| PCOD8212629    | 19.17                       | 12.68                                 | 0.20                           | 1.6001                          | 0.0083               | 2.6124                          | 0.0389               | 3.0833                          | 0.0403               | 0.0313          | 0.2338          | 0.1552          | 0.0002                 | 0.0005                 |
| PCOD8263321    | 19.17                       | 12.43                                 | 0.03                           | 1.6024                          | 0.0087               | 2.6164                          | 0.0301               | 3.0703                          | 0.0455               | 0.0495          | 0.1252          | 0.2087          | 0.0000                 | 0.0023                 |
| PCOD8279905    | 19.18                       | 12.52                                 | 0.10                           | 1.6017                          | 0.0059               | 2.6153                          | 0.0237               | 3.0753                          | 0.0281               | 0.0199          | 0.1001          | 0.1027          | 0.0001                 | 0.0006                 |
| PCOD8166947    | 19.18                       | 12.46                                 | 0.07                           | 1.6001                          | 0.0076               | 2.6126                          | 0.0294               | 3.0835                          | 0.0296               | 0.0284          | 0.1179          | 0.1022          | 0.0001                 | 0.0004                 |
| PCOD8299839    | 19.18                       | 12.43                                 | 0.05                           | 1.5996                          | 0.0073               | 2.6119                          | 0.0277               | 3.0856                          | 0.0307               | 0.0336          | 0.0986          | 0.1158          | 0.0000                 | 0.0004                 |
| PCOD8074186    | 19.19                       | 12.68                                 | 0.22                           | 1.6028                          | 0.0045               | 2.6170                          | 0.0345               | 3.0693                          | 0.0211               | 0.0189          | 0.1551          | 0.0733          | 0.0001                 | 0.0010                 |
| PCOD8203264    | 19.21                       | 12.42                                 | 0.07                           | 1.6013                          | 0.0100               | 2.6145                          | 0.0296               | 3.0761                          | 0.0503               | 0.0505          | 0.1499          | 0.2099          | 0.0001                 | 0.0016                 |
| PCOD8263142    | 19.25                       | 12.05                                 | 0.15                           | 1.6023                          | 0.0071               | 2.6164                          | 0.0202               | 3.0710                          | 0.0373               | 0.0281          | 0.0881          | 0.1154          | 0.0001                 | 0.0019                 |

| Structure code | FD<br>(T nm <sup>-3</sup> ) | $\Delta E$<br>(kJ mol <sup>-1</sup> ) | $\nu$<br>(T nm <sup>-3</sup> ) | $\langle D_{TO} \rangle$<br>(Å) | $\sigma_{TO}$<br>(Å) | $\langle D_{OO} \rangle$<br>(Å) | $\sigma_{OO}$<br>(Å) | $\langle D_{TT} \rangle$<br>(Å) | $\sigma_{TT}$<br>(Å) | $R_{TO}$<br>(Å) | $R_{OO}$<br>(Å) | $R_{TT}$<br>(Å) | $\epsilon_{OO}$<br>(Å) | $\epsilon_{TT}$<br>(Å) |
|----------------|-----------------------------|---------------------------------------|--------------------------------|---------------------------------|----------------------|---------------------------------|----------------------|---------------------------------|----------------------|-----------------|-----------------|-----------------|------------------------|------------------------|
| PCOD8184109    | 19.25                       | 12.35                                 | 0.06                           | 1.6009                          | 0.0079               | 2.6140                          | 0.0223               | 3.0791                          | 0.0360               | 0.0312          | 0.0884          | 0.1340          | 0.0001                 | 0.0009                 |
| PCOD8244420    | 19.26                       | 12.20                                 | 0.03                           | 1.6014                          | 0.0064               | 2.6148                          | 0.0241               | 3.0763                          | 0.0382               | 0.0269          | 0.1146          | 0.1536          | 0.0001                 | 0.0012                 |
| PCOD8212659    | 19.27                       | 12.80                                 | 0.38                           | 1.6012                          | 0.0069               | 2.6143                          | 0.0344               | 3.0777                          | 0.0334               | 0.0251          | 0.1753          | 0.1232          | 0.0001                 | 0.0006                 |
| PCOD8030566    | 19.29                       | 12.21                                 | 0.00                           | 1.6017                          | 0.0097               | 2.6154                          | 0.0244               | 3.0745                          | 0.0574               | 0.0410          | 0.0941          | 0.1941          | 0.0001                 | 0.0012                 |
| PCOD8092485    | 19.29                       | 12.28                                 | 0.05                           | 1.5998                          | 0.0080               | 2.6123                          | 0.0258               | 3.0841                          | 0.0455               | 0.0312          | 0.1012          | 0.1819          | 0.0001                 | 0.0009                 |
| PCOD8226345    | 19.29                       | 12.24                                 | 0.03                           | 1.6024                          | 0.0062               | 2.6166                          | 0.0193               | 3.0710                          | 0.0357               | 0.0241          | 0.0796          | 0.1209          | 0.0002                 | 0.0015                 |
| PCOD8226678    | 19.30                       | 12.24                                 | 0.03                           | 1.5995                          | 0.0066               | 2.6118                          | 0.0305               | 3.0860                          | 0.0231               | 0.0282          | 0.1160          | 0.0884          | 0.0001                 | 0.0005                 |
| PCOD8064814    | 19.31                       | 12.22                                 | 0.04                           | 1.5982                          | 0.0071               | 2.6094                          | 0.0397               | 3.0934                          | 0.0397               | 0.0274          | 0.1680          | 0.1588          | 0.0002                 | 0.0004                 |
| PCOD8253793    | 19.32                       | 12.24                                 | 0.05                           | 1.6010                          | 0.0058               | 2.6142                          | 0.0236               | 3.0788                          | 0.0290               | 0.0180          | 0.0898          | 0.1258          | 0.0001                 | 0.0006                 |
| PCOD8106914    | 19.33                       | 11.45                                 | 0.48                           | 1.6014                          | 0.0068               | 2.6149                          | 0.0235               | 3.0758                          | 0.0337               | 0.0242          | 0.1045          | 0.1355          | 0.0001                 | 0.0016                 |
| PCOD8100187    | 19.34                       | 12.18                                 | 0.03                           | 1.5992                          | 0.0076               | 2.6111                          | 0.0349               | 3.0876                          | 0.0389               | 0.0323          | 0.1496          | 0.1713          | 0.0001                 | 0.0004                 |
| PCOD8126287    | 19.35                       | 12.37                                 | 0.18                           | 1.5976                          | 0.0086               | 2.6085                          | 0.0344               | 3.0959                          | 0.0336               | 0.0269          | 0.1367          | 0.1240          | 0.0001                 | 0.0000                 |
| PCOD8108172    | 19.36                       | 12.10                                 | 0.00                           | 1.6030                          | 0.0080               | 2.6174                          | 0.0253               | 3.0673                          | 0.0432               | 0.0314          | 0.1157          | 0.2056          | 0.0000                 | 0.0022                 |
| PCOD8053556    | 19.37                       | 12.17                                 | 0.06                           | 1.5997                          | 0.0090               | 2.6120                          | 0.0297               | 3.0847                          | 0.0382               | 0.0383          | 0.1066          | 0.1203          | 0.0000                 | 0.0010                 |
| PCOD8262533    | 19.37                       | 12.18                                 | 0.07                           | 1.5999                          | 0.0077               | 2.6122                          | 0.0283               | 3.0842                          | 0.0453               | 0.0324          | 0.1210          | 0.1849          | 0.0001                 | 0.0007                 |
| PCOD8107265    | 19.38                       | 12.16                                 | 0.06                           | 1.5997                          | 0.0058               | 2.6120                          | 0.0314               | 3.0855                          | 0.0276               | 0.0211          | 0.1110          | 0.0939          | 0.0000                 | 0.0002                 |
| PCOD8238333    | 19.39                       | 12.20                                 | 0.09                           | 1.5977                          | 0.0087               | 2.6089                          | 0.0280               | 3.0952                          | 0.0364               | 0.0365          | 0.1211          | 0.1514          | 0.0001                 | 0.0001                 |
| PCOD8252568    | 19.40                       | 12.06                                 | 0.01                           | 1.5999                          | 0.0086               | 2.6121                          | 0.0295               | 3.0840                          | 0.0436               | 0.0369          | 0.1260          | 0.1995          | 0.0001                 | 0.0008                 |
| PCOD8204154    | 19.40                       | 12.09                                 | 0.03                           | 1.6017                          | 0.0059               | 2.6154                          | 0.0228               | 3.0750                          | 0.0286               | 0.0211          | 0.0963          | 0.1200          | 0.0001                 | 0.0008                 |
| PCOD8263726    | 19.42                       | 12.05                                 | 0.02                           | 1.5988                          | 0.0093               | 2.6105                          | 0.0309               | 3.0895                          | 0.0401               | 0.0396          | 0.1192          | 0.1494          | 0.0000                 | 0.0007                 |
| PCOD8259339    | 19.42                       | 12.13                                 | 0.08                           | 1.5998                          | 0.0062               | 2.6120                          | 0.0333               | 3.0846                          | 0.0330               | 0.0294          | 0.1422          | 0.1579          | 0.0001                 | 0.0008                 |
| PCOD8280218    | 19.43                       | 12.00                                 | 0.00                           | 1.6028                          | 0.0082               | 2.6172                          | 0.0227               | 3.0678                          | 0.0479               | 0.0326          | 0.1001          | 0.1771          | 0.0001                 | 0.0025                 |
| PCOD8186502    | 19.46                       | 11.50                                 | 0.31                           | 1.6016                          | 0.0080               | 2.6150                          | 0.0292               | 3.0740                          | 0.0478               | 0.0488          | 0.1406          | 0.1884          | 0.0000                 | 0.0024                 |
| PCOD8066265    | 19.47                       | 11.99                                 | 0.03                           | 1.6001                          | 0.0063               | 2.6126                          | 0.0304               | 3.0833                          | 0.0269               | 0.0239          | 0.1001          | 0.1043          | 0.0001                 | 0.0004                 |
| PCOD8106085    | 19.52                       | 11.92                                 | 0.04                           | 1.5985                          | 0.0077               | 2.6100                          | 0.0307               | 3.0911                          | 0.0360               | 0.0290          | 0.1041          | 0.1498          | 0.0000                 | 0.0004                 |
| PCOD8190086    | 19.54                       | 11.98                                 | 0.09                           | 1.5969                          | 0.0090               | 2.6075                          | 0.0324               | 3.0992                          | 0.0317               | 0.0304          | 0.1163          | 0.1256          | 0.0000                 | 0.0001                 |
| PCOD8053512    | 19.55                       | 11.88                                 | 0.04                           | 1.6030                          | 0.0066               | 2.6176                          | 0.0212               | 3.0674                          | 0.0408               | 0.0248          | 0.0786          | 0.1286          | 0.0001                 | 0.0020                 |
| PCOD8074925    | 19.56                       | 11.90                                 | 0.06                           | 1.6011                          | 0.0085               | 2.6142                          | 0.0287               | 3.0774                          | 0.0388               | 0.0417          | 0.1328          | 0.1561          | 0.0000                 | 0.0016                 |
| PCOD8063798    | 19.57                       | 11.84                                 | 0.03                           | 1.6010                          | 0.0068               | 2.6142                          | 0.0301               | 3.0783                          | 0.0253               | 0.0259          | 0.1057          | 0.1005          | 0.0000                 | 0.0008                 |
| PCOD8066118    | 19.58                       | 11.58                                 | 0.14                           | 1.6021                          | 0.0104               | 2.6159                          | 0.0323               | 3.0714                          | 0.0324               | 0.0517          | 0.1684          | 0.1374          | 0.0001                 | 0.0025                 |
| PCOD8101543    | 19.58                       | 11.82                                 | 0.02                           | 1.6017                          | 0.0070               | 2.6153                          | 0.0268               | 3.0746                          | 0.0441               | 0.0284          | 0.0981          | 0.1424          | 0.0000                 | 0.0013                 |

| Structure code | FD<br>(T nm <sup>-3</sup> ) | $\Delta E$<br>(kJ mol <sup>-1</sup> ) | $\nu$<br>(T nm <sup>-3</sup> ) | $\langle D_{TO} \rangle$<br>(Å) | $\sigma_{TO}$<br>(Å) | $\langle D_{OO} \rangle$<br>(Å) | $\sigma_{OO}$<br>(Å) | $\langle D_{TT} \rangle$<br>(Å) | $\sigma_{TT}$<br>(Å) | $R_{TO}$<br>(Å) | $R_{OO}$<br>(Å) | $R_{TT}$<br>(Å) | $\epsilon_{OO}$<br>(Å) | $\epsilon_{TT}$<br>(Å) |
|----------------|-----------------------------|---------------------------------------|--------------------------------|---------------------------------|----------------------|---------------------------------|----------------------|---------------------------------|----------------------|-----------------|-----------------|-----------------|------------------------|------------------------|
| PCOD8103191    | 19.59                       | 12.06                                 | 0.20                           | 1.5987                          | 0.0087               | 2.6103                          | 0.0327               | 3.0900                          | 0.0429               | 0.0374          | 0.1609          | 0.1515          | 0.0001                 | 0.0005                 |
| PCOD8253792    | 19.59                       | 12.13                                 | 0.25                           | 1.6021                          | 0.0057               | 2.6160                          | 0.0238               | 3.0725                          | 0.0220               | 0.0263          | 0.1090          | 0.0853          | 0.0001                 | 0.0015                 |
| PCOD8065512    | 19.59                       | 11.95                                 | 0.12                           | 1.5997                          | 0.0080               | 2.6121                          | 0.0263               | 3.0847                          | 0.0403               | 0.0295          | 0.1044          | 0.1395          | 0.0001                 | 0.0009                 |
| PCOD8108886    | 19.61                       | 11.80                                 | 0.05                           | 1.5996                          | 0.0064               | 2.6118                          | 0.0270               | 3.0855                          | 0.0341               | 0.0259          | 0.0922          | 0.1329          | 0.0000                 | 0.0007                 |
| PCOD8260200    | 19.63                       | 11.79                                 | 0.06                           | 1.5992                          | 0.0077               | 2.6112                          | 0.0290               | 3.0871                          | 0.0428               | 0.0304          | 0.1138          | 0.1479          | 0.0000                 | 0.0008                 |
| PCOD8175660    | 19.64                       | 11.77                                 | 0.06                           | 1.5980                          | 0.0079               | 2.6093                          | 0.0276               | 3.0931                          | 0.0368               | 0.0275          | 0.0963          | 0.1410          | 0.0000                 | 0.0007                 |
| PCOD8100640    | 19.65                       | 11.66                                 | 0.02                           | 1.6015                          | 0.0079               | 2.6149                          | 0.0307               | 3.0746                          | 0.0419               | 0.0424          | 0.1312          | 0.1889          | 0.0001                 | 0.0020                 |
| PCOD8106132    | 19.65                       | 11.89                                 | 0.14                           | 1.5974                          | 0.0088               | 2.6083                          | 0.0299               | 3.0962                          | 0.0368               | 0.0313          | 0.1134          | 0.1443          | 0.0000                 | 0.0005                 |
| PCOD8101754    | 19.65                       | 11.74                                 | 0.05                           | 1.5998                          | 0.0074               | 2.6121                          | 0.0303               | 3.0844                          | 0.0260               | 0.0396          | 0.1120          | 0.1092          | 0.0000                 | 0.0009                 |
| PCOD8106011    | 19.66                       | 11.59                                 | 0.05                           | 1.5985                          | 0.0082               | 2.6100                          | 0.0303               | 3.0908                          | 0.0351               | 0.0296          | 0.1123          | 0.1447          | 0.0000                 | 0.0008                 |
| PCOD8253230    | 19.66                       | 11.90                                 | 0.17                           | 1.5997                          | 0.0092               | 2.6119                          | 0.0357               | 3.0846                          | 0.0393               | 0.0453          | 0.1582          | 0.1361          | 0.0001                 | 0.0011                 |
| PCOD8076067    | 19.67                       | 11.75                                 | 0.07                           | 1.5976                          | 0.0099               | 2.6085                          | 0.0325               | 3.0953                          | 0.0377               | 0.0410          | 0.1387          | 0.1493          | 0.0001                 | 0.0007                 |
| PCOD8212295    | 19.68                       | 11.62                                 | 0.01                           | 1.6020                          | 0.0071               | 2.6158                          | 0.0258               | 3.0723                          | 0.0419               | 0.0300          | 0.1046          | 0.1313          | 0.0000                 | 0.0021                 |
| PCOD8106010    | 19.69                       | 11.68                                 | 0.04                           | 1.5991                          | 0.0079               | 2.6110                          | 0.0306               | 3.0878                          | 0.0329               | 0.0311          | 0.1115          | 0.1386          | 0.0000                 | 0.0008                 |
| PCOD8074911    | 19.70                       | 11.75                                 | 0.10                           | 1.6023                          | 0.0079               | 2.6163                          | 0.0279               | 3.0706                          | 0.0377               | 0.0475          | 0.1309          | 0.1251          | 0.0000                 | 0.0022                 |
| PCOD8071734    | 19.70                       | 11.36                                 | 0.17                           | 1.6005                          | 0.0094               | 2.6132                          | 0.0297               | 3.0802                          | 0.0428               | 0.0432          | 0.1166          | 0.1897          | 0.0000                 | 0.0017                 |
| PCOD8170247    | 19.71                       | 11.67                                 | 0.05                           | 1.5966                          | 0.0084               | 2.6069                          | 0.0332               | 3.1004                          | 0.0347               | 0.0308          | 0.1151          | 0.1317          | 0.0000                 | 0.0004                 |
| PCOD8102052    | 19.74                       | 11.66                                 | 0.07                           | 1.5986                          | 0.0080               | 2.6102                          | 0.0308               | 3.0902                          | 0.0337               | 0.0341          | 0.1423          | 0.1357          | 0.0000                 | 0.0008                 |
| PCOD8189478    | 19.76                       | 11.60                                 | 0.05                           | 1.6025                          | 0.0072               | 2.6167                          | 0.0233               | 3.0695                          | 0.0425               | 0.0262          | 0.0821          | 0.1268          | 0.0001                 | 0.0023                 |
| PCOD8189713    | 19.76                       | 11.57                                 | 0.04                           | 1.6017                          | 0.0069               | 2.6152                          | 0.0304               | 3.0739                          | 0.0315               | 0.0362          | 0.1557          | 0.1227          | 0.0001                 | 0.0020                 |
| PCOD8103161    | 19.78                       | 11.61                                 | 0.08                           | 1.5993                          | 0.0087               | 2.6114                          | 0.0303               | 3.0863                          | 0.0353               | 0.0347          | 0.1295          | 0.1470          | 0.0000                 | 0.0012                 |
| PCOD8238064    | 19.80                       | 11.27                                 | 0.13                           | 1.5991                          | 0.0081               | 2.6110                          | 0.0303               | 3.0872                          | 0.0308               | 0.0344          | 0.1581          | 0.1590          | 0.0000                 | 0.0014                 |
| PCOD8100218    | 19.81                       | 11.53                                 | 0.05                           | 1.5985                          | 0.0085               | 2.6101                          | 0.0294               | 3.0903                          | 0.0360               | 0.0364          | 0.1045          | 0.1521          | 0.0000                 | 0.0012                 |
| PCOD8253969    | 19.81                       | 11.44                                 | 0.01                           | 1.5984                          | 0.0079               | 2.6099                          | 0.0293               | 3.0909                          | 0.0321               | 0.0336          | 0.1548          | 0.1668          | 0.0000                 | 0.0010                 |
| PCOD8108406    | 19.81                       | 11.46                                 | 0.02                           | 1.5996                          | 0.0087               | 2.6119                          | 0.0299               | 3.0848                          | 0.0329               | 0.0360          | 0.1302          | 0.1382          | 0.0000                 | 0.0013                 |
| PCOD8049791    | 19.83                       | 11.41                                 | 0.01                           | 1.6018                          | 0.0089               | 2.6154                          | 0.0329               | 3.0736                          | 0.0505               | 0.0271          | 0.1519          | 0.1983          | 0.0000                 | 0.0017                 |
| PCOD8237350    | 19.83                       | 11.43                                 | 0.01                           | 1.6004                          | 0.0092               | 2.6132                          | 0.0258               | 3.0807                          | 0.0403               | 0.0388          | 0.0886          | 0.1685          | 0.0000                 | 0.0015                 |
| PCOD8180088    | 19.85                       | 11.49                                 | 0.07                           | 1.5987                          | 0.0089               | 2.6105                          | 0.0297               | 3.0892                          | 0.0383               | 0.0273          | 0.1004          | 0.1305          | 0.0001                 | 0.0013                 |
| PCOD8220674    | 19.85                       | 12.03                                 | 0.44                           | 1.5996                          | 0.0083               | 2.6118                          | 0.0290               | 3.0854                          | 0.0386               | 0.0350          | 0.1486          | 0.1718          | 0.0001                 | 0.0007                 |
| PCOD8233108    | 19.86                       | 11.30                                 | 0.05                           | 1.6002                          | 0.0073               | 2.6128                          | 0.0252               | 3.0816                          | 0.0424               | 0.0417          | 0.1155          | 0.1732          | 0.0000                 | 0.0017                 |
| PCOD8109096    | 19.87                       | 11.32                                 | 0.02                           | 1.6008                          | 0.0066               | 2.6139                          | 0.0256               | 3.0785                          | 0.0177               | 0.0241          | 0.1145          | 0.0608          | 0.0001                 | 0.0017                 |

| Structure code     | FD<br>(T nm <sup>-3</sup> ) | $\Delta E$<br>(kJ mol <sup>-1</sup> ) | $\nu$<br>(T nm <sup>-3</sup> ) | $\langle D_{TO} \rangle$<br>(Å) | $\sigma_{TO}$<br>(Å) | $\langle D_{OO} \rangle$<br>(Å) | $\sigma_{OO}$<br>(Å) | $\langle D_{TT} \rangle$<br>(Å) | $\sigma_{TT}$<br>(Å) | $R_{TO}$<br>(Å) | $R_{OO}$<br>(Å) | $R_{TT}$<br>(Å) | $\epsilon_{OO}$<br>(Å) | $\epsilon_{TT}$<br>(Å) |
|--------------------|-----------------------------|---------------------------------------|--------------------------------|---------------------------------|----------------------|---------------------------------|----------------------|---------------------------------|----------------------|-----------------|-----------------|-----------------|------------------------|------------------------|
| <b>PCOD8330772</b> | 19.88                       | 11.34                                 | 0.00                           | 1.6014                          | 0.0075               | 2.6149                          | 0.0208               | 3.0753                          | 0.0386               | 0.0332          | 0.0931          | 0.1766          | 0.0001                 | 0.0022                 |
| <b>PCOD8062708</b> | 19.88                       | 11.34                                 | 0.00                           | 1.5991                          | 0.0082               | 2.6109                          | 0.0273               | 3.0879                          | 0.0384               | 0.0341          | 0.1108          | 0.1581          | 0.0000                 | 0.0009                 |
| <b>PCOD8213655</b> | 19.88                       | 12.01                                 | 0.46                           | 1.5999                          | 0.0069               | 2.6122                          | 0.0303               | 3.0840                          | 0.0392               | 0.0265          | 0.1176          | 0.1433          | 0.0001                 | 0.0008                 |
| <b>PCOD8210118</b> | 19.89                       | 11.34                                 | 0.01                           | 1.5997                          | 0.0078               | 2.6119                          | 0.0272               | 3.0848                          | 0.0364               | 0.0331          | 0.1139          | 0.1456          | 0.0000                 | 0.0010                 |
| <b>PCOD8173853</b> | 19.90                       | 11.55                                 | 0.16                           | 1.6009                          | 0.0066               | 2.6141                          | 0.0250               | 3.0781                          | 0.0271               | 0.0240          | 0.1002          | 0.0955          | 0.0001                 | 0.0016                 |
| <b>PCOD8107094</b> | 19.90                       | 11.10                                 | 0.15                           | 1.5987                          | 0.0070               | 2.6103                          | 0.0311               | 3.0896                          | 0.0306               | 0.0313          | 0.1164          | 0.1377          | 0.0001                 | 0.0011                 |
| <b>PCOD8065286</b> | 19.90                       | 11.34                                 | 0.02                           | 1.6026                          | 0.0065               | 2.6167                          | 0.0274               | 3.0691                          | 0.0419               | 0.0262          | 0.1149          | 0.1662          | 0.0000                 | 0.0025                 |
| <b>PCOD8280920</b> | 19.94                       | 11.27                                 | 0.01                           | 1.6013                          | 0.0058               | 2.6148                          | 0.0213               | 3.0763                          | 0.0265               | 0.0212          | 0.0896          | 0.0930          | 0.0001                 | 0.0014                 |
| <b>PCOD8075297</b> | 19.94                       | 11.29                                 | 0.02                           | 1.6016                          | 0.0074               | 2.6151                          | 0.0300               | 3.0737                          | 0.0382               | 0.0341          | 0.1364          | 0.1579          | 0.0000                 | 0.0026                 |
| <b>PCOD8254037</b> | 19.95                       | 11.86                                 | 0.42                           | 1.5997                          | 0.0068               | 2.6116                          | 0.0408               | 3.0848                          | 0.0393               | 0.0365          | 0.1878          | 0.1500          | 0.0003                 | 0.0010                 |
| <b>PCOD8308388</b> | 19.95                       | 11.28                                 | 0.03                           | 1.5970                          | 0.0073               | 2.6075                          | 0.0362               | 3.0980                          | 0.0302               | 0.0255          | 0.1468          | 0.1095          | 0.0002                 | 0.0006                 |
| <b>PCOD8154046</b> | 19.95                       | 11.31                                 | 0.05                           | 1.5977                          | 0.0066               | 2.6084                          | 0.0365               | 3.0946                          | 0.0441               | 0.0280          | 0.1564          | 0.1642          | 0.0003                 | 0.0011                 |
| <b>PCOD8260399</b> | 19.98                       | 11.21                                 | 0.01                           | 1.5999                          | 0.0082               | 2.6124                          | 0.0253               | 3.0831                          | 0.0467               | 0.0312          | 0.1032          | 0.1480          | 0.0001                 | 0.0017                 |
| <b>PCOD8273476</b> | 19.99                       | 11.31                                 | 0.09                           | 1.5991                          | 0.0089               | 2.6110                          | 0.0287               | 3.0872                          | 0.0410               | 0.0374          | 0.1064          | 0.1167          | 0.0000                 | 0.0014                 |



**Table S3.** 153 unfeasible hypothetical frameworks detected by the TTT criteria.

|                    |                                               |                                               |
|--------------------|-----------------------------------------------|-----------------------------------------------|
| <b>PCOD8326122</b> | 5-RingminTTT [ <u>100.5</u> , <u>107.1</u> ]  | 10-RingminTTT [ <u>140.3</u> , <u>140.3</u> ] |
| <b>PCOD8200684</b> | 10-RingmaxTTT [ <u>173.5</u> , <u>173.6</u> ] |                                               |
| <b>PCOD8320054</b> | 9-RingmaxTTT [ <u>158.3</u> , <u>158.3</u> ]  |                                               |
| <b>PCOD8315654</b> | 14-RingminTTT [ <u>140.7</u> , <u>140.7</u> ] | 14-RingmaxTTT [ <u>173.7</u> , <u>173.7</u> ] |
| <b>PCOD8320524</b> | 9-RingmaxTTT [ <u>157.5</u> , <u>157.5</u> ]  |                                               |
| <b>PCOD8327476</b> | 5-RingminTTT [ <u>107.6</u> , <u>107.6</u> ]  |                                               |
| <b>PCOD8325055</b> | 5-RingminTTT [ <u>107.4</u> , <u>107.4</u> ]  |                                               |
| <b>PCOD8322022</b> | 5-RingmaxTTT [ <u>130.1</u> , <u>134.4</u> ]  | 5-Ringspan-TTT [ <u>42.5</u> , <u>47.6</u> ]  |
| <b>PCOD8193831</b> | 12-RingmaxTTT [ <u>177.4</u> , <u>177.4</u> ] |                                               |
| <b>PCOD8196409</b> | 12-RingmaxTTT [ <u>177.4</u> , <u>177.4</u> ] |                                               |
| <b>PCOD8320017</b> | 7-Ringspan-TTT [ <u>11.1</u> , <u>11.1</u> ]  |                                               |
| <b>PCOD8196708</b> | 12-RingmaxTTT [ <u>177.4</u> , <u>177.4</u> ] |                                               |
| <b>PCOD8324447</b> | 5-Ringspan-TTT [ <u>19.6</u> , <u>36.2</u> ]  |                                               |
| <b>PCOD8298138</b> | 5-RingminTTT [ <u>104.2</u> , <u>106.9</u> ]  |                                               |
| <b>PCOD8265553</b> | 10-RingmaxTTT [ <u>174.2</u> , <u>174.2</u> ] | 10-Ringspan-TTT [ <u>56.1</u> , <u>56.1</u> ] |
| <b>PCOD8255421</b> | 9-RingmaxTTT [ <u>137.3</u> , <u>137.3</u> ]  | 11-RingmaxTTT [ <u>136.5</u> , <u>136.5</u> ] |
|                    | 11-RingminTTT [ <u>94.7</u> , <u>94.7</u> ]   | 11-Ringspan-TTT [ <u>41.8</u> , <u>41.8</u> ] |
| <b>PCOD8265558</b> | 5-RingminTTT [ <u>107.8</u> , <u>107.8</u> ]  |                                               |
| <b>PCOD8329746</b> | 10-RingmaxTTT [ <u>159.1</u> , <u>159.1</u> ] |                                               |
| <b>PCOD8313111</b> | 6-RingminTTT [ <u>75.6</u> , <u>119.1</u> ]   |                                               |
| <b>PCOD8196694</b> | 12-RingmaxTTT [ <u>177.4</u> , <u>177.4</u> ] |                                               |
| <b>PCOD8326816</b> | 10-RingmaxTTT [ <u>152.7</u> , <u>152.7</u> ] |                                               |
| <b>PCOD8316043</b> | 7-RingminTTT [ <u>85.9</u> , <u>96.1</u> ]    | 10-RingmaxTTT [ <u>156.7</u> , <u>156.7</u> ] |
| <b>PCOD8316036</b> | 7-Ringspan-TTT [ <u>10.2</u> , <u>10.2</u> ]  |                                               |
| <b>PCOD8312314</b> | 10-RingmaxTTT [ <u>154.3</u> , <u>154.3</u> ] |                                               |
| <b>PCOD8307105</b> | 10-RingmaxTTT [ <u>160.0</u> , <u>160.0</u> ] |                                               |
| <b>PCOD8116632</b> | 5-Ringspan-TTT [ <u>25.8</u> , <u>36.2</u> ]  |                                               |
| <b>PCOD8287212</b> | 12-RingmaxTTT [ <u>118.8</u> , <u>118.8</u> ] |                                               |
| <b>PCOD8330297</b> | 5-RingminTTT [ <u>107.6</u> , <u>107.6</u> ]  |                                               |
| <b>PCOD8297228</b> | 7-RingmaxTTT [ <u>122.8</u> , <u>141.0</u> ]  | 7-RingminTTT [ <u>89.6</u> , <u>106.5</u> ]   |
| <b>PCOD8275427</b> | 7-RingmaxTTT [ <u>122.5</u> , <u>142.5</u> ]  | 7-RingminTTT [ <u>89.7</u> , <u>106.8</u> ]   |
| <b>PCOD8307101</b> | 5-Ringspan-TTT [ <u>18.3</u> , <u>36.3</u> ]  |                                               |
| <b>PCOD8274173</b> | 7-RingminTTT [ <u>88.9</u> , <u>91.1</u> ]    |                                               |
| <b>PCOD8312121</b> | 4-RingmaxTTT [ <u>90.1</u> , <u>97.3</u> ]    |                                               |
| <b>PCOD8275276</b> | 5-RingminTTT [ <u>106.6</u> , <u>107.3</u> ]  |                                               |
| <b>PCOD8297400</b> | 7-RingmaxTTT [ <u>122.2</u> , <u>141.1</u> ]  | 7-RingminTTT [ <u>89.6</u> , <u>108.0</u> ]   |
| <b>PCOD8265260</b> | 5-RingminTTT [ <u>105.6</u> , <u>107.0</u> ]  |                                               |
| <b>PCOD8298127</b> | 7-RingmaxTTT [ <u>123.5</u> , <u>145.6</u> ]  | 7-RingminTTT [ <u>85.7</u> , <u>108.0</u> ]   |
| <b>PCOD8275748</b> | 7-RingmaxTTT [ <u>121.8</u> , <u>143.2</u> ]  | 7-RingminTTT [ <u>89.2</u> , <u>107.9</u> ]   |
| <b>PCOD8275707</b> | 7-RingmaxTTT [ <u>121.8</u> , <u>141.2</u> ]  | 7-RingminTTT [ <u>89.0</u> , <u>107.2</u> ]   |
| <b>PCOD8316327</b> | 10-RingminTTT [ <u>141.1</u> , <u>141.1</u> ] |                                               |
| <b>PCOD8323380</b> | 10-RingminTTT [ <u>86.2</u> , <u>107.9</u> ]  | 10-Ringspan-TTT [ <u>39.3</u> , <u>56.7</u> ] |
|                    | 16-RingmaxTTT [ <u>157.8</u> , <u>157.8</u> ] | 16-RingminTTT [ <u>147.2</u> , <u>147.2</u> ] |
|                    |                                               | 16-Ringspan-TTT [ <u>10.6</u> , <u>10.6</u> ] |
| <b>PCOD8322639</b> | 5-RingminTTT [ <u>107.5</u> , <u>107.5</u> ]  | 7-RingmaxTTT [ <u>142.8</u> , <u>142.8</u> ]  |
| <b>PCOD8056809</b> | 6-RingminTTT [ <u>75.9</u> , <u>119.4</u> ]   |                                               |
| <b>PCOD8275094</b> | 10-Ringspan-TTT [ <u>3.6</u> , <u>3.6</u> ]   |                                               |
| <b>PCOD8287229</b> | 5-Ringspan-TTT [ <u>18.3</u> , <u>35.8</u> ]  |                                               |
| <b>PCOD8327305</b> | 5-RingminTTT [ <u>107.4</u> , <u>107.4</u> ]  |                                               |

**PCOD8325399** 5-RingminTTT [107.3, 107.3]  
**PCOD8265609** 12-RingmaxTTT [122.6, 122.6]  
**PCOD8330275** 5-RingminTTT [107.4, 107.4] 9-RingminTTT [125.1, 125.1]  
**PCOD8287165** 5-RingmaxTTT [100.7, 100.7]  
**PCOD8330350** 7-RingmaxTTT [138.1, 138.1]  
**PCOD8287111** 12-RingmaxTTT [115.9, 145.1]  
**PCOD8314793** 9-RingmaxTTT [149.6, 151.0]  
**PCOD8311295** 9-RingmaxTTT [150.0, 150.0]  
**PCOD8288263** 12-RingmaxTTT [117.0, 117.0]  
**PCOD8328754** 7-RingmaxTTT [147.8, 147.8] 7-Ringspan-TTT [56.2, 56.3]  
**PCOD8326837** 5-RingmaxTTT [120.0, 127.4] 5-Ringspan-TTT [23.5, 37.5]  
**PCOD8317699** 9-RingminTTT [133.3, 133.3]  
**PCOD8275237** 10-RingmaxTTT [153.6, 153.6]  
**PCOD8224235** 5-Ringspan-TTT [15.0, 35.7]  
**PCOD8297653** 7-RingmaxTTT [138.9, 140.4]  
**PCOD8275569** 7-RingmaxTTT [152.6, 154.9] 5-Ringspan-TTT [48.0, 49.9]  
**PCOD8267700** 5-Ringspan-TTT [11.3, 37.2]  
**PCOD8325760** 14-RingmaxTTT [146.4, 146.4] 14-RingminTTT [89.7, 89.9] 14-Ringspan-TTT [56.4, 56.7]  
**PCOD8312182** 16-RingmaxTTT [159.6, 159.6] 16-RingminTTT [155.2, 155.2] 16-Ringspan-TTT [4.4, 4.4]  
**PCOD8287561** 7-RingmaxTTT [142.8, 142.8]  
**PCOD8287401** 7-RingmaxTTT [137.4, 137.4] 7-RingminTTT [83.3, 83.4] 7-Ringspan-TTT [54.1, 54.1]  
**PCOD8288490** 10-RingmaxTTT [159.1, 159.1]  
**PCOD8265454** 12-Ringmax [115.5, 145.6]  
**PCOD8287569** 5-RingmaxTTT [108.1, 126.5]  
**PCOD8167047** 5-Ringspan-TTT [7.6, 37.2]  
**PCOD8288185** 5-Ringspan-TTT [36.2, 36.2] 7-RingmaxTTT [145.3, 145.3] 7-Ringspan-TTT [49.7, 49.7]  
**PCOD8177390** 16-RingmaxTTT [147.5, 147.5] 16-RingminTTT [115.7, 115.7] 16-Ringspan-TTT [31.8, 31.8]  
**PCOD8250146** 16-RingmaxTTT [147.1, 147.1] 16-RingminTTT [115.1, 115.1] 16-Ringspan-TTT [31.9, 31.9]  
**PCOD8182441** 16-RingmaxTTT [147.8, 147.8] 16-RingminTTT [115.8, 115.8] 16-Ringspan-TTT [32.0, 32.0]  
**PCOD8275951** 6-RingmaxTTT [114.0, 152.9]  
**PCOD8267707** 12-RingmaxTTT [116.8, 116.8]  
**PCOD8239101** 16-RingmaxTTT [148.1, 148.1] 16-RingminTTT [115.3, 115.3] 16-Ringspan-TTT [32.8, 32.8]  
**PCOD8297791** 10-RingmaxTTT [161.5, 161.5] 10-Ringspan-TTT [49.9, 67.9]  
**PCOD8288184** 7-RingmaxTTT [140.5, 140.5]  
**PCOD8268335** 12-RingmaxTTT [116.5, 116.5]  
**PCOD8250245** 16-RingmaxTTT [148.0, 148.0] 16-RingminTTT [119.5, 119.5] 16-Ringspan-TTT [28.5, 28.5]  
**PCOD8265597** 16-RingmaxTTT [145.9, 145.9] 16-RingminTTT [105.9, 122.9] 16-Ringspan-TTT [23.0, 40.0]  
**PCOD8250160** 16-RingminTTT [115.2, 115.2] 16-Ringspan-TTT [33.9, 34.0]  
**PCOD8188016** 16-RingminTTT [115.3, 115.3] 16-Ringspan-TTT [33.8, 33.8]  
**PCOD8330439** 5-RingminTTT [107.6, 107.6]  
**PCOD8068543** 16-RingmaxTTT [144.8, 144.8] 16-RingminTTT [116.1, 116.1] 16-Ringspan-TTT [28.7, 28.7]  
**PCOD8275488** 7-RingmaxTTT [139.4, 139.4]  
**PCOD8323005** 5-Ringspan-TTT [10.4, 41.0]  
**PCOD8235822** 16-RingminTTT [119.6, 119.6] 16-Ringspan-TTT [31.3, 31.3]  
**PCOD8068618** 16-RingmaxTTT [146.3, 146.3] 16-RingminTTT [119.2, 119.2] 16-Ringspan-TTT [27.1, 27.1]  
**PCOD8287233** 5-RingspanTTT [12.7, 38.0]  
**PCOD8293075** 7-RingmaxTTT [141.9, 141.9] 7-Ringspan-TTT [48.2, 48.2]  
**PCOD8275312** 5-RingspanTTT [24.5, 40.5] 16-RingminTTT [111.7, 111.7] 16-Ringspan-TTT [37.7, 37.7]  
**PCOD8069999** 16-RingmaxTTT [146.5, 146.5] 16-RingminTTT [118.0, 118.0] 16-Ringspan-TTT [28.6, 28.6]  
**PCOD8069998** 16-RingmaxTTT [146.7, 146.7] 16-RingminTTT [114.8, 114.9] 16-Ringspan-TTT [31.8, 31.8]

**PCOD8070119** 16-RingmaxTTT [146.6, 146.6] 16-RingminTTT [119.8, 119.8] 16-Ringspan-TTT [26.8, 26.8]  
**PCOD8250254** 14-RingmaxTTT [145.3, 145.3]  
**PCOD8068380** 14-RingminTTT [134.9, 134.9] 14-Ringspan-TTT [13.5, 13.5]  
**PCOD8206142** 9-RingmaxTTT [136.8, 143.7] 16-RingmaxTTT [143.7, 143.7] 16-Ringspan-TTT [39.5, 39.2]  
**PCOD8298578** 5-RingminTTT [95.2, 107.2] 10-Ringspan-TTT [4.5, 6.4]  
**PCOD8286942** 5-RingSpan-TTT [1.0, 2.4]  
**PCOD8295265** 7-RingmaxTTT [139.2, 139.2]  
**PCOD8323528** 10-RingminTTT [82.8, 82.8] 10-Ringspan-TTT [62.2, 62.2]  
**PCOD8287412** 14-RingmaxTTT [145.0, 146.0] 14-RingminTTT [94.1, 132.1] 14-RingSpan-TTT [12.9, 51.9]  
**PCOD8202513** 16-RingmaxTTT [147.3, 147.3] 16-RingminTTT [123.7, 123.7] 16-Ringspan-TTT [23.6, 23.6]  
**PCOD8078965** 16-RingmaxTTT [148.2, 148.2] 16-RingminTTT [122.2, 122.2] 16-Ringspan-TTT [26.0, 26.0]  
**PCOD8287612** 16-RingmaxTTT [129.6, 147.5] 16-RingminTTT [110.6, 123.0] 16-Ringspan-TTT [7.9, 35.8]  
**PCOD8256053** 16-RingmaxTTT [134.1, 147.1] 16-RingminTTT [111.4, 121.8] 16-Ringspan-TTT [22.5, 35.5]  
**PCOD8177530** 12-RingmaxTTT [117.1, 145.0]  
**PCOD8084987** 14-RingmaxTTT [146.0, 146.0] 14-Ringspan-TTT [25.8, 25.8]  
**PCOD8230406** 14-Ringspan-TTT [26.0, 26.0]  
**PCOD8206627** 16-RingmaxTTT [146.5, 146.5] 16-RingminTTT [125.9, 125.9] 16-Ringspan-TTT [20.6, 20.6]  
**PCOD8068222** 16-RingmaxTTT [143.4, 143.4] 16-RingminTTT [118.0, 118.0] 16-Ringspan-TTT [25.4, 25.4]  
**PCOD8230860** 6-RingminTTT [77.5, 117.2]  
**PCOD8188235** 12-RingmaxTTT [118.1, 148.2]  
**PCOD8230781** 14-RingSpan-TTT [24.3, 24.3]  
**PCOD8207879** 16-RingmaxTT [144.8, 144.8] 16-RingminTTT [125.4, 125.4] 16-Ringspan-TTT [19.4, 19.4]  
**PCOD8241484** 14-RingmaxTTT [158.1, 158.1]  
**PCOD8206399** 14-RingmaxTTT [145.4, 145.4] 14-RingminTTT [129.4, 129.4] 14-RingSpan-TTT [16.1, 16.1]  
**PCOD8086115** 7-RingmaxTTT [140.3, 140.3]  
**PCOD8061081** 14-RingmaxTTT [145.6, 145.6] 14-Ringspan-TTT [18.2, 18.2]  
**PCOD8057902** 14-RingmaxTTT [145.5, 145.5] 14-Ringspan-TTT [22.0, 22.0]  
**PCOD8230494** 9-RingmaxTTT [136.9, 138.8]  
**PCOD8039026** 16-RingmaxTTT [136.0, 136.0] 16-RingminTTT [111.8, 111.8] 16-Ringspan-TTT [24.2, 24.2]  
**PCOD8092398** 9-RingmaxTTT [137.2, 138.8]  
**PCOD8084263** 7-RingminTTT [89.0, 89.0] 12-RingmaxTTT [126.4, 126.4]  
14-RingmaxTTT [137.8, 141.4] 14-RingminTTT [103.2, 108.1]  
**PCOD8210381** 14-RingmaxTTT [140.1, 140.1] 14-Ringspan-TTT [24.6, 24.6]  
**PCOD8097531** 10-RingmaxTTT [152.5, 153.0] 10-Ringspan-TTT [39.8, 60.2]  
**PCOD8236883** 10-RingmaxTTT [152.3, 152.3] 10-Ringspan-TTT [47.1, 62.5]  
**PCOD8082880** 5-RingmaxTTT [100.0, 117.3]  
**PCOD8098730** 14-RingmaxTTT [140.5, 141.6] 14-Ringspan-TTT [23.5, 24.5]  
**PCOD8059902** 14-RingmaxTTT [144.0, 144.0] 14-Ringspan-TTT [16.8, 16.8]  
**PCOD8178240** 5-Ringspan-TTT [20.0, 42.2]  
**PCOD8242436** 14-RingmaxTTT [136.9, 136.9] 14-Ringspan-TTT [20.6, 20.6]  
**PCOD8236886** 16-RingmaxTTT [155.6, 155.6] 16-Ringspan-TTT [52.1, 52.1]  
**PCOD8318118** 7-Ringspan-TTT [7.8, 22.6]  
**PCOD8294496** 7-Ringspan-TTT [7.9, 41.3] 16-RingminTTT [114.7, 115.8] 16-Ringspan-TTT [37.6, 38.7]  
**PCOD8061492** 9-RingmaxTTT [134.5, 139.0]  
**PCOD8257777** 14-RingminTTT [85.3, 90.9] 14-Ringspan-TTT [60.2, 65.7]  
**PCOD8103956** 7-RingmaxTTT [138.0, 142.2] 7-Ringspan-TTT [41.5, 48.7]  
**PCOD8110532** 10-RingmaxTTT [131.9, 153.7]  
**PCOD8073258** 7-RingmaxTTT [139.5, 139.6]  
**PCOD8236328** 9-RingmaxTTT [135.8, 140.0]  
**PCOD8198832** 14-RingmaxTTT [138.0, 138.2] 14-RingminTTT [101.8, 102.0]

**PCOD8141547** 7-RingminTTT [81.6, 106.4] 7-Ringspan-TTT [23.1, 48.2]  
**PCOD8142649** 7-RingminTTT [85.8, 85.8]  
**PCOD8049981** 7-RingminTTT [85.7, 85.7]  
**PCOD8226678** 7-RingmaxTTT [138.2, 138.3]  
**PCOD8190086** 7-RingmaxTTT [118.6, 133.1]  
**PCOD8066118** 5-Ringspan-TTT [18.3, 35.8]  
**PCOD8101754** 7-RingmaxTTT [137.3, 137.3]  
**PCOD8189713** 9-RingmaxTTT [156.5, 156.5]

---

**Table S4** Shortest non-adjacent O...O distances for different sizes of rings among 231 existing zeolites.

| <b>Zeolite</b> | <b>4-Ring (nm)</b> | <b>5-Ring (nm)</b> | <b>6-Ring (nm)</b> | <b>7-Ring (nm)</b> | <b>8-Ring (nm)</b> | <b>9-Ring (nm)</b> | <b>10-Ring (nm)</b> | <b>12-Ring (nm)</b> |
|----------------|--------------------|--------------------|--------------------|--------------------|--------------------|--------------------|---------------------|---------------------|
| <b>ABW</b>     | 0.3605             |                    | 0.3914             |                    | 0.4318             |                    |                     |                     |
| <b>ACO</b>     | 0.3717             |                    |                    |                    | 0.4462             |                    |                     |                     |
| <b>AEI</b>     | 0.3365             |                    | 0.3984             |                    | 0.4386             |                    |                     |                     |
| <b>AEL</b>     | 0.3556             |                    | 0.3407             |                    |                    |                    | 0.4471              |                     |
| <b>AEN</b>     | 0.3518             |                    | 0.3454             |                    | 0.3785             |                    |                     |                     |
| <b>AET</b>     | 0.2941             |                    | 0.3075             |                    |                    |                    |                     |                     |
| <b>AFG</b>     | 0.3584             |                    | 0.3835             |                    |                    |                    |                     |                     |
| <b>AFI</b>     | 0.3629             |                    | 0.3551             |                    |                    |                    |                     | 0.4909              |
| <b>AFN</b>     | 0.3280             |                    | 0.3539             |                    | 0.4057             |                    |                     |                     |
| <b>AFO</b>     | 0.3478             |                    | 0.3402             |                    |                    |                    | 0.4287              |                     |
| <b>AFR</b>     | 0.3425             |                    | 0.3629             |                    | 0.4386             |                    |                     | 0.4437              |
| <b>AFS</b>     | 0.3366             |                    | 0.3613             |                    | 0.4372             |                    |                     | 0.4194              |
| <b>AFT</b>     | 0.3363             |                    | 0.4013             |                    | 0.4732             |                    |                     |                     |
| <b>AFV</b>     | 0.3347             |                    | 0.3863             |                    | 0.4408             |                    |                     |                     |
| <b>AFX</b>     | 0.3363             |                    | 0.4027             |                    | 0.4486             |                    |                     |                     |
| <b>AFY</b>     | 0.3234             |                    |                    |                    | 0.4606             |                    |                     | 0.4258              |
| <b>AHT</b>     | 0.2994             |                    | 0.3223             |                    |                    |                    | 0.4365              |                     |
| <b>ANA</b>     | 0.3682             |                    | 0.4279             |                    | 0.3683             |                    |                     |                     |
| <b>APC</b>     | 0.3066             |                    | 0.4293             |                    | 0.4081             |                    |                     |                     |
| <b>APD</b>     | 0.3321             |                    | 0.3475             |                    | 0.3724             |                    |                     |                     |
| <b>AST</b>     | 0.3683             |                    | 0.3485             |                    |                    |                    |                     |                     |
| <b>ASV</b>     | 0.3660             |                    | 0.3085             |                    |                    |                    |                     | 0.3575              |
| <b>ATN</b>     | 0.3516             |                    | 0.3613             |                    | 0.3516             |                    |                     |                     |
| <b>ATO</b>     | 0.3326             |                    | 0.3367             |                    |                    |                    |                     | 0.4120              |
| <b>ATS</b>     | 0.3553             |                    | 0.3617             |                    |                    |                    |                     | 0.4715              |
| <b>ATT</b>     | 0.3495             |                    | 0.3681             |                    | 0.4010             |                    |                     |                     |
| <b>ATV</b>     | 0.3660             |                    | 0.3565             |                    | 0.4207             |                    |                     |                     |
| <b>AVL</b>     | 0.3277             |                    | 0.3864             |                    | 0.4412             |                    |                     |                     |
| <b>AWO</b>     | 0.3351             |                    | 0.3317             |                    | 0.4264             |                    |                     |                     |
| <b>AWW</b>     | 0.3450             |                    | 0.3351             |                    | 0.4678             |                    |                     |                     |

|             |        |        |        |        |        |        |
|-------------|--------|--------|--------|--------|--------|--------|
| <b>BCT</b>  | 0.3695 |        | 0.3759 | 0.3814 |        |        |
| <b>BEA</b>  | 0.3168 | 0.3568 | 0.3480 |        |        | 0.4718 |
| <b>BEC</b>  | 0.3254 | 0.3564 | 0.3888 |        |        | 0.4728 |
| <b>BIK</b>  |        | 0.3616 | 0.3599 | 0.3964 |        |        |
| <b>BOF</b>  | 0.3517 | 0.3752 | 0.3308 |        | 0.4105 |        |
| <b>BOG</b>  | 0.3362 | 0.3648 | 0.3375 |        | 0.4759 | 0.4632 |
| <b>BOZ</b>  | 0.3313 |        | 0.3668 | 0.4208 | 0.4603 |        |
| <b>BPH</b>  | 0.3366 |        | 0.3611 | 0.4173 |        | 0.4200 |
| <b>BRE</b>  | 0.3613 | 0.3229 | 0.3698 | 0.3458 |        |        |
| <b>BSV</b>  | 0.3116 |        | 0.4093 |        |        | 0.3439 |
| <b>CAN</b>  | 0.3630 |        | 0.3791 |        |        | 0.3791 |
| <b>CAS</b>  |        | 0.3558 | 0.3361 | 0.3361 |        |        |
| <b>CDO</b>  |        | 0.3163 |        | 0.3972 |        |        |
| <b>CFI</b>  | 0.3657 | 0.3228 | 0.3885 |        |        |        |
| <b>CGF</b>  | 0.3420 |        | 0.3390 | 0.4001 | 0.3422 |        |
| <b>CGS</b>  | 0.3434 |        | 0.3683 | 0.3917 | 0.3879 |        |
| <b>CHA</b>  | 0.3398 |        | 0.4012 | 0.4490 |        |        |
| <b>-CHI</b> | 0.3528 | 0.3893 | 0.3345 |        | 0.3583 |        |
| <b>-CLO</b> | 0.3531 |        | 0.3824 | 0.4637 |        |        |
| <b>CON</b>  | 0.3281 | 0.3474 | 0.3473 |        | 0.4546 | 0.4536 |
| <b>CSV</b>  | 0.3361 | 0.3326 | 0.3243 | 0.3980 | 0.4568 |        |
| <b>CZP</b>  | 0.3094 |        |        | 0.3007 |        | 0.3321 |
| <b>DAC</b>  | 0.3500 | 0.3359 |        | 0.4336 | 0.3725 |        |
| <b>DDR</b>  | 0.3540 | 0.3059 | 0.4429 | 0.4429 |        |        |
| <b>DFO</b>  | 0.3274 |        | 0.3070 | 0.4165 | 0.4687 | 0.3761 |
| <b>DFT</b>  | 0.3298 |        | 0.3650 | 0.3650 |        |        |
| <b>DOH</b>  | 0.3538 | 0.3275 | 0.3902 |        |        |        |
| <b>DON</b>  | 0.3253 | 0.3343 | 0.3553 |        |        |        |
| <b>EAB</b>  | 0.3492 |        | 0.3880 | 0.4270 |        |        |
| <b>EDI</b>  | 0.3719 |        |        | 0.4206 |        |        |
| <b>EEI</b>  | 0.3453 | 0.3043 | 0.3441 | 0.4215 |        |        |
| <b>EMT</b>  | 0.3301 |        | 0.3828 |        |        | 0.4900 |
| <b>EON</b>  | 0.3325 | 0.3445 | 0.3882 | 0.3723 |        | 0.4406 |

| <b>Zeolite</b> | <b>4-Ring (nm)</b> | <b>5-Ring (nm)</b> | <b>6-Ring (nm)</b> | <b>7-Ring (nm)</b> | <b>8-Ring (nm)</b> | <b>9-Ring (nm)</b> | <b>10-Ring (nm)</b> | <b>12-Ring (nm)</b> |
|----------------|--------------------|--------------------|--------------------|--------------------|--------------------|--------------------|---------------------|---------------------|
| <b>EPI</b>     | 0.3745             | 0.3252             |                    |                    | 0.4008             |                    |                     |                     |
| <b>ERI</b>     | 0.3554             |                    | 0.3680             |                    | 0.4233             |                    |                     |                     |
| <b>ESV</b>     | 0.3443             | 0.3339             | 0.3627             |                    | 0.4336             |                    |                     |                     |
| <b>ETR</b>     | 0.3359             |                    | 0.3617             |                    | 0.3301             |                    |                     |                     |
| <b>EUO</b>     | 0.3173             | 0.3158             | 0.3531             |                    |                    |                    | 0.4497              |                     |
| <b>-EWT</b>    | 0.3235             | 0.3179             | 0.3131             | 0.3142             |                    |                    | 0.4295              |                     |
| <b>EZT</b>     | 0.3410             |                    | 0.3211             |                    | 0.3989             |                    |                     | 0.3864              |
| <b>FAR</b>     | 0.3594             |                    | 0.3843             |                    |                    |                    |                     |                     |
| <b>FAU</b>     | 0.3355             |                    | 0.3827             |                    |                    |                    |                     | 0.4902              |
| <b>FER</b>     |                    | 0.3294             | 0.3693             |                    | 0.3933             |                    | 0.3933              |                     |
| <b>FRA</b>     | 0.3442             |                    | 0.3457             |                    |                    |                    |                     |                     |
| <b>GIS</b>     | 0.3400             |                    |                    |                    | 0.4801             |                    |                     |                     |
| <b>GIU</b>     | 0.3435             |                    | 0.3712             |                    |                    |                    |                     |                     |
| <b>GME</b>     | 0.3332             |                    | 0.4058             |                    | 0.4500             |                    |                     | 0.4724              |
| <b>GON</b>     | 0.3306             | 0.3633             | 0.3720             |                    | 0.3843             |                    |                     | 0.4523              |
| <b>GOO</b>     | 0.3381             |                    | 0.3480             |                    | 0.3648             |                    |                     |                     |
| <b>HEU</b>     | 0.3617             | 0.3496             |                    |                    | 0.3528             |                    | 0.3528              |                     |
| <b>IFO</b>     | 0.3389             |                    | 0.3192             |                    |                    |                    |                     |                     |
| <b>IFR</b>     | 0.3370             | 0.3596             | 0.3241             |                    |                    |                    |                     | 0.4539              |
| <b>-IFU</b>    | 0.3343             | 0.3208             | 0.3959             |                    | 0.3547             |                    |                     | 0.4856              |
| <b>IFW</b>     | 0.3302             | 0.3243             | 0.3727             |                    | 0.4102             |                    | 0.4695              |                     |
| <b>IFY</b>     | 0.3200             |                    | 0.3254             |                    | 0.3145             |                    |                     |                     |
| <b>IHW</b>     | 0.3506             | 0.3341             | 0.3321             |                    | 0.4073             |                    |                     |                     |
| <b>IMF</b>     | 0.3187             | 0.3135             | 0.3088             |                    |                    |                    | 0.4508              |                     |
| <b>IRN</b>     | 0.3493             | 0.3289             | 0.3407             | 0.4079             | 0.4411             |                    |                     |                     |
| <b>IRR</b>     | 0.3537             | 0.3209             | 0.4109             |                    |                    |                    |                     | 0.4817              |
| <b>-IRY</b>    | 0.3239             | 0.3138             | 0.3928             |                    |                    |                    |                     |                     |
| <b>ISV</b>     | 0.3295             | 0.3468             | 0.3840             |                    |                    |                    |                     | 0.4230              |
| <b>ITE</b>     | 0.3153             | 0.3476             | 0.3491             |                    | 0.3952             |                    |                     |                     |
| <b>ITG</b>     | 0.3345             | 0.3328             | 0.3377             |                    |                    |                    | 0.4389              | 0.4680              |
| <b>ITH</b>     | 0.3427             | 0.3410             | 0.3679             |                    |                    | 0.4265             | 0.4497              |                     |
| <b>-ITN</b>    | 0.3061             | 0.3256             | 0.3342             |                    |                    |                    | 0.4629              | 0.4605              |

| <b>Zeolite</b> | <b>4-Ring (nm)</b> | <b>5-Ring (nm)</b> | <b>6-Ring (nm)</b> | <b>7-Ring (nm)</b> | <b>8-Ring (nm)</b> | <b>9-Ring (nm)</b> | <b>10-Ring (nm)</b> | <b>12-Ring (nm)</b> |
|----------------|--------------------|--------------------|--------------------|--------------------|--------------------|--------------------|---------------------|---------------------|
| <b>ITR</b>     | 0.3367             | 0.3476             | 0.3524             |                    |                    | 0.4253             | 0.4506              |                     |
| <b>ITT</b>     | 0.3453             | 0.3146             | 0.3574             |                    |                    |                    | 0.4802              |                     |
| <b>-ITV</b>    | 0.3495             |                    | 0.3448             |                    |                    |                    |                     |                     |
| <b>ITW</b>     | 0.3490             | 0.3192             | 0.3929             |                    | 0.3994             |                    |                     |                     |
| <b>IWR</b>     | 0.2986             | 0.3939             | 0.3165             |                    |                    |                    | 0.4587              | 0.4108              |
| <b>IWS</b>     | 0.3002             | 0.3289             | 0.3508             |                    |                    |                    |                     | 0.4875              |
| <b>IWV</b>     | 0.3262             | 0.3196             | 0.3643             |                    |                    |                    |                     | 0.4791              |
| <b>IWW</b>     | 0.3347             | 0.3315             | 0.3486             |                    | 0.3804             |                    | 0.4486              | 0.4798              |
| <b>JBW</b>     | 0.3660             |                    | 0.3720             |                    | 0.4313             |                    |                     |                     |
| <b>JNT</b>     | 0.3007             |                    | 0.3248             |                    | 0.3454             |                    |                     |                     |
| <b>JOZ</b>     | 0.3195             |                    |                    |                    | 0.3787             |                    |                     |                     |
| <b>JRY</b>     | 0.3472             |                    | 0.4133             |                    |                    |                    | 0.3982              |                     |
| <b>JSN</b>     | 0.3476             |                    | 0.3309             |                    | 0.4138             |                    |                     |                     |
| <b>JSR</b>     | 0.3476             |                    | 0.3265             |                    |                    |                    |                     |                     |
| <b>JST</b>     |                    |                    | 0.3982             |                    |                    |                    | 0.4074              |                     |
| <b>JSW</b>     | 0.3406             |                    | 0.3552             |                    | 0.3562             |                    |                     |                     |
| <b>KFI</b>     | 0.3389             |                    | 0.3962             |                    | 0.4195             |                    |                     |                     |
| <b>LAU</b>     | 0.3479             |                    | 0.3278             |                    |                    |                    | 0.4153              |                     |
| <b>LEV</b>     | 0.3540             |                    | 0.3835             |                    | 0.4292             |                    |                     |                     |
| <b>LIO</b>     | 0.3573             |                    | 0.3841             |                    |                    |                    |                     |                     |
| <b>-LIT</b>    | 0.3380             |                    | 0.3618             |                    | 0.3948             |                    | 0.3138              |                     |
| <b>LOS</b>     | 0.3570             |                    | 0.3858             |                    |                    |                    |                     |                     |
| <b>LOV</b>     | 0.3417             |                    | 0.3678             |                    | 0.3848             | 0.3934             |                     |                     |
| <b>LTA</b>     | 0.3685             |                    | 0.3853             |                    | 0.4678             |                    |                     |                     |
| <b>LTF</b>     | 0.3337             | 0.3648             | 0.3613             |                    | 0.3678             |                    |                     | 0.4311              |
| <b>LTJ</b>     | 0.3669             |                    | 0.3406             |                    | 0.4112             |                    |                     |                     |
| <b>LTL</b>     | 0.3455             |                    | 0.3589             |                    | 0.3280             |                    |                     | 0.5009              |
| <b>LTN</b>     | 0.3484             |                    | 0.3921             |                    | 0.4369             |                    |                     |                     |
| <b>MAR</b>     | 0.3591             |                    | 0.3842             |                    |                    |                    |                     |                     |
| <b>MAZ</b>     | 0.3342             | 0.3670             | 0.3889             |                    | 0.3726             |                    |                     | 0.4977              |
| <b>MEI</b>     | 0.3551             | 0.3358             |                    | 0.4227             |                    |                    |                     | 0.4692              |
| <b>MEL</b>     | 0.3450             | 0.3296             | 0.3468             |                    | 0.3468             |                    | 0.4515              |                     |



| <b>Zeolite</b> | <b>4-Ring (nm)</b> | <b>5-Ring (nm)</b> | <b>6-Ring (nm)</b> | <b>7-Ring (nm)</b> | <b>8-Ring (nm)</b> | <b>9-Ring (nm)</b> | <b>10-Ring (nm)</b> | <b>12-Ring (nm)</b> |
|----------------|--------------------|--------------------|--------------------|--------------------|--------------------|--------------------|---------------------|---------------------|
| <b>MEP</b>     |                    | 0.3055             | 0.3944             |                    |                    |                    |                     |                     |
| <b>MER</b>     | 0.3362             |                    |                    |                    | 0.4134             |                    |                     |                     |
| <b>MFI</b>     | 0.3374             | 0.3292             | 0.3334             |                    |                    |                    | 0.4606              |                     |
| <b>MFS</b>     | 0.3388             | 0.3433             | 0.3397             |                    | 0.4079             |                    | 0.4689              |                     |
| <b>MON</b>     | 0.3646             | 0.3628             |                    |                    | 0.3800             |                    |                     |                     |
| <b>MOR</b>     | 0.3467             | 0.3353             |                    |                    | 0.3804             |                    |                     | 0.4416              |
| <b>MOZ</b>     | 0.3428             |                    | 0.3607             |                    | 0.3244             |                    |                     | 0.4264              |
| <b>MRE</b>     | 0.3218             | 0.3333             | 0.3402             |                    |                    |                    | 0.4623              |                     |
| <b>MSE</b>     | 0.3289             | 0.3283             | 0.3591             |                    |                    |                    | 0.4619              | 0.4619              |
| <b>MSO</b>     | 0.3512             |                    | 0.3408             |                    |                    |                    |                     |                     |
| <b>MTF</b>     | 0.3503             | 0.3420             | 0.3382             |                    | 0.4647             |                    |                     |                     |
| <b>MTN</b>     |                    | 0.3089             | 0.4085             |                    |                    |                    |                     |                     |
| <b>MTT</b>     |                    | 0.3268             | 0.3440             |                    |                    |                    | 0.4644              |                     |
| <b>MTW</b>     | 0.3546             | 0.3370             | 0.3295             |                    |                    |                    |                     | 0.3878              |
| <b>MVY</b>     | 0.3115             |                    | 0.3583             |                    |                    |                    | 0.3803              |                     |
| <b>MWF</b>     | 0.3323             |                    | 0.4279             |                    | 0.4023             |                    |                     |                     |
| <b>MWW</b>     | 0.3567             | 0.3506             | 0.3408             |                    |                    |                    | 0.4510              |                     |
| <b>NAB</b>     | 0.3752             |                    |                    |                    | 0.4503             | 0.4343             |                     |                     |
| <b>NAT</b>     | 0.3710             |                    |                    |                    | 0.4072             | 0.3833             |                     |                     |
| <b>NES</b>     | 0.3499             | 0.3064             | 0.3697             |                    |                    |                    | 0.4511              |                     |
| <b>NON</b>     | 0.3608             | 0.3132             | 0.3487             |                    |                    |                    |                     |                     |
| <b>NPO</b>     |                    |                    | 0.3622             |                    |                    |                    |                     | 0.4176              |
| <b>NPT</b>     | 0.3745             |                    |                    |                    | 0.4460             |                    |                     |                     |
| <b>NSI</b>     |                    | 0.3609             | 0.3524             |                    | 0.3839             |                    |                     |                     |
| <b>OBW</b>     | 0.3745             |                    |                    |                    | 0.4283             |                    | 0.4609              |                     |
| <b>OFF</b>     | 0.3499             |                    | 0.3680             |                    | 0.4214             |                    |                     | 0.4214              |
| <b>OKO</b>     | 0.3382             | 0.3044             | 0.3569             |                    |                    |                    | 0.4645              | 0.4490              |
| <b>OSI</b>     | 0.3400             |                    | 0.3564             |                    |                    |                    |                     | 0.4659              |
| <b>OSO</b>     |                    |                    |                    |                    | 0.4170             |                    |                     |                     |
| <b>OWE</b>     | 0.3340             |                    | 0.3337             |                    | 0.3337             |                    |                     |                     |
| <b>-PAR</b>    | 0.3485             |                    | 0.3169             |                    | 0.3119             |                    | 0.4267              |                     |
| <b>PAU</b>     | 0.3321             |                    | 0.4277             |                    | 0.4054             |                    |                     |                     |

| <b>Zeolite</b> | <b>4-Ring (nm)</b> | <b>5-Ring (nm)</b> | <b>6-Ring (nm)</b> | <b>7-Ring (nm)</b> | <b>8-Ring (nm)</b> | <b>9-Ring (nm)</b> | <b>10-Ring (nm)</b> | <b>12-Ring (nm)</b> |
|----------------|--------------------|--------------------|--------------------|--------------------|--------------------|--------------------|---------------------|---------------------|
| <b>PCR</b>     |                    | 0.3191             | 0.3474             |                    | 0.4065             |                    | 0.4068              |                     |
| <b>PHI</b>     | 0.3373             |                    |                    |                    | 0.4063             |                    |                     |                     |
| <b>PON</b>     | 0.3391             |                    | 0.3293             |                    |                    |                    | 0.3832              |                     |
| <b>POS</b>     | 0.3080             | 0.3129             | 0.3830             |                    |                    |                    |                     | 0.4856              |
| <b>PSI</b>     | 0.3450             |                    | 0.3205             |                    | 0.3540             |                    | 0.4337              |                     |
| <b>PUN</b>     | 0.3275             |                    |                    |                    | 0.4042             |                    | 0.4411              |                     |
| <b>RHO</b>     | 0.3321             |                    | 0.4275             |                    | 0.4616             |                    |                     |                     |
| <b>-RON</b>    | 0.3751             |                    | 0.3329             |                    |                    |                    | 0.4437              | 0.3356              |
| <b>RRO</b>     | 0.3247             | 0.3629             |                    |                    | 0.4384             |                    | 0.4483              |                     |
| <b>RSN</b>     | 0.3450             | 0.3543             | 0.3652             |                    | 0.3910             | 0.3955             |                     |                     |
| <b>RTE</b>     | 0.3241             | 0.3563             | 0.3641             |                    | 0.4664             |                    |                     |                     |
| <b>RTH</b>     | 0.3180             | 0.3471             | 0.3765             |                    | 0.4678             |                    |                     |                     |
| <b>RUT</b>     | 0.3442             | 0.3412             | 0.3471             |                    | 0.4673             |                    |                     |                     |
| <b>RWR</b>     | 0.3228             | 0.3362             | 0.3254             |                    | 0.4303             |                    |                     |                     |
| <b>RWY</b>     |                    |                    |                    |                    | 0.3872             |                    |                     | 0.4345              |
| <b>SAF</b>     | 0.3441             |                    | 0.3226             |                    |                    |                    |                     | 0.4787              |
| <b>SAO</b>     | 0.3354             |                    | 0.3384             |                    |                    |                    |                     | 0.4763              |
| <b>SAS</b>     | 0.3450             |                    | 0.3679             |                    | 0.4673             |                    |                     |                     |
| <b>SAT</b>     | 0.3573             |                    | 0.3848             |                    | 0.4055             |                    |                     |                     |
| <b>SAV</b>     | 0.3294             |                    | 0.3837             |                    | 0.4256             |                    |                     |                     |
| <b>SBE</b>     | 0.3469             |                    | 0.3442             |                    | 0.4006             |                    |                     | 0.4914              |
| <b>SBN</b>     | 0.3736             |                    |                    |                    | 0.4484             |                    |                     |                     |
| <b>SBS</b>     | 0.3439             |                    | 0.3731             |                    | 0.3454             |                    |                     | 0.4759              |
| <b>SBT</b>     | 0.3429             |                    | 0.3612             |                    | 0.3466             |                    |                     | 0.4761              |
| <b>SEW</b>     | 0.3139             | 0.3487             | 0.3315             |                    |                    |                    | 0.4587              | 0.4742              |
| <b>SFE</b>     | 0.3486             | 0.3299             | 0.3689             |                    |                    |                    |                     | 0.4580              |
| <b>SFF</b>     | 0.3367             | 0.3352             | 0.3241             |                    |                    |                    | 0.4771              |                     |
| <b>SFG</b>     | 0.3287             | 0.3365             | 0.3350             | 0.4074             |                    |                    | 0.4686              |                     |
| <b>SFH</b>     | 0.3478             | 0.3159             | 0.3098             |                    |                    |                    |                     |                     |
| <b>SFN</b>     | 0.3453             | 0.3325             | 0.3516             |                    |                    |                    |                     |                     |
| <b>SFO</b>     | 0.3458             |                    | 0.3627             |                    | 0.4390             |                    |                     | 0.4877              |
| <b>SFS</b>     | 0.3442             | 0.3253             | 0.3410             |                    |                    |                    | 0.4488              | 0.4645              |

| <b>Zeolite</b> | <b>4-Ring (nm)</b> | <b>5-Ring (nm)</b> | <b>6-Ring (nm)</b> | <b>7-Ring (nm)</b> | <b>8-Ring (nm)</b> | <b>9-Ring (nm)</b> | <b>10-Ring (nm)</b> | <b>12-Ring (nm)</b> |
|----------------|--------------------|--------------------|--------------------|--------------------|--------------------|--------------------|---------------------|---------------------|
| <b>SFV</b>     | 0.3262             | 0.3266             | 0.3305             |                    | 0.3213             |                    | 0.4736              | 0.4608              |
| <b>SFW</b>     | 0.3329             |                    | 0.4027             |                    | 0.4487             |                    |                     |                     |
| <b>SGT</b>     | 0.3259             | 0.3332             | 0.3415             |                    |                    |                    |                     |                     |
| <b>SIV</b>     | 0.3373             |                    |                    |                    | 0.4056             |                    |                     |                     |
| <b>SOD</b>     | 0.3680             |                    | 0.3999             |                    |                    |                    |                     |                     |
| <b>SOF</b>     | 0.3223             | 0.3096             |                    |                    |                    | 0.4004             |                     | 0.4276              |
| <b>SOS</b>     | 0.3152             |                    | 0.3149             |                    | 0.3149             |                    |                     | 0.4488              |
| <b>SSF</b>     | 0.3296             | 0.3553             | 0.3659             |                    |                    |                    |                     | 0.4767              |
| <b>-SSO</b>    | 0.3506             | 0.3134             | 0.3492             |                    |                    |                    |                     |                     |
| <b>SSY</b>     | 0.3444             | 0.3357             | 0.3555             |                    |                    |                    |                     | 0.4613              |
| <b>STF</b>     | 0.3374             | 0.3315             | 0.3202             |                    |                    |                    | 0.4711              |                     |
| <b>STI</b>     | 0.3599             | 0.3389             | 0.4197             |                    | 0.4075             |                    | 0.4206              |                     |
| <b>STO</b>     | 0.3289             | 0.3302             | 0.3462             |                    |                    |                    |                     | 0.4699              |
| <b>STT</b>     | 0.3044             | 0.3261             | 0.3196             | 0.3988             |                    | 0.4474             |                     |                     |
| <b>STW</b>     | 0.3415             | 0.3029             |                    |                    | 0.3860             |                    | 0.4590              |                     |
| <b>SVR</b>     | 0.3253             | 0.3193             | 0.3282             |                    |                    |                    | 0.4512              |                     |
| <b>SVV</b>     | 0.3426             | 0.3389             | 0.3460             |                    |                    |                    |                     |                     |
| <b>SZR</b>     | 0.3507             | 0.3525             | 0.3611             |                    | 0.4051             |                    | 0.4587              |                     |
| <b>TER</b>     | 0.3394             | 0.3440             | 0.3482             |                    |                    |                    | 0.4275              |                     |
| <b>THO</b>     | 0.3721             |                    |                    |                    | 0.4244             |                    |                     |                     |
| <b>TOL</b>     | 0.3464             |                    | 0.3790             |                    |                    |                    |                     |                     |
| <b>TON</b>     |                    | 0.3602             | 0.3515             |                    |                    |                    | 0.4595              |                     |
| <b>TSC</b>     | 0.3284             |                    | 0.3749             |                    | 0.4140             |                    |                     |                     |
| <b>TUN</b>     | 0.3266             | 0.3259             | 0.3171             |                    |                    |                    | 0.4581              |                     |
| <b>UEI</b>     | 0.3352             |                    | 0.3328             |                    | 0.4254             |                    |                     |                     |
| <b>UFI</b>     | 0.3476             | 0.3433             | 0.3775             |                    | 0.4686             |                    |                     |                     |
| <b>UOS</b>     | 0.3502             | 0.3417             | 0.4061             |                    | 0.3773             |                    | 0.3773              |                     |
| <b>UOV</b>     | 0.3278             | 0.3168             | 0.3295             |                    |                    |                    | 0.4413              | 0.3696              |
| <b>UOZ</b>     | 0.3629             |                    | 0.3089             |                    | 0.3463             |                    |                     |                     |
| <b>USI</b>     | 0.3412             |                    | 0.3267             |                    |                    |                    | 0.4515              | 0.4494              |
| <b>UTL</b>     | 0.3255             | 0.3069             | 0.3319             |                    |                    |                    |                     | 0.4632              |
| <b>UWY</b>     | 0.3412             | 0.3200             | 0.3809             |                    |                    |                    | 0.4456              | 0.4746              |

| <b>Zeolite</b> | <b>4-Ring (nm)</b> | <b>5-Ring (nm)</b> | <b>6-Ring (nm)</b> | <b>7-Ring (nm)</b> | <b>8-Ring (nm)</b> | <b>9-Ring (nm)</b> | <b>10-Ring (nm)</b> | <b>12-Ring (nm)</b> |
|----------------|--------------------|--------------------|--------------------|--------------------|--------------------|--------------------|---------------------|---------------------|
| <b>VET</b>     |                    | 0.3288             | 0.3752             | 0.3634             | 0.3842             |                    |                     | 0.4708              |
| <b>VFI</b>     | 0.2935             |                    | 0.3380             |                    |                    |                    |                     |                     |
| <b>VNI</b>     | 0.3656             | 0.3504             |                    |                    | 0.3631             |                    |                     |                     |
| <b>VSV</b>     | 0.3737             | 0.3545             |                    |                    | 0.3862             | 0.3910             |                     |                     |
| <b>WEI</b>     | 0.3465             |                    | 0.3207             |                    | 0.4538             |                    | 0.4502              |                     |
| <b>-WEN</b>    | 0.3507             |                    | 0.3665             |                    | 0.3833             |                    | 0.3833              |                     |
| <b>YUG</b>     | 0.3649             | 0.3541             |                    |                    | 0.4046             |                    |                     |                     |
| <b>ZON</b>     | 0.3504             |                    | 0.3317             |                    | 0.3860             |                    |                     |                     |

**Table S5** Shortest non-adjacent O...O distances for different sizes of rings among 941 hypothetical zeolites. Unfeasible structures detected by the closest non-adjacent O...O pair criteria are underlined.

| Structure code     | 4-Ring (nm)   | 5-Ring (nm)   | 6-Ring (nm) | 8-Ring (nm)   | 10-Ring (nm) | 12-Ring (nm) |
|--------------------|---------------|---------------|-------------|---------------|--------------|--------------|
| <u>PCOD8312971</u> | <u>0.2831</u> |               |             | 0.3867        |              |              |
| PCOD8329332        | 0.2976        |               | 0.4103      |               |              |              |
| <u>PCOD8322921</u> | <u>0.2873</u> | 0.3986        | 0.3890      |               | 0.4985       |              |
| PCOD8321585        | 0.2949        |               | 0.3991      |               |              |              |
| <u>PCOD8326122</u> | <u>0.2825</u> | 0.3635        | 0.3653      |               | 0.4777       |              |
| <u>PCOD8330856</u> | <u>0.2727</u> |               | 0.3481      | 0.3697        |              |              |
| <u>PCOD8200794</u> | <u>0.2786</u> |               | 0.4064      | 0.3992        |              |              |
| <u>PCOD8329851</u> | <u>0.2829</u> | 0.3351        | 0.3996      | 0.3984        |              |              |
| <u>PCOD8327563</u> | <u>0.2811</u> |               | 0.3369      | 0.4239        |              |              |
| <u>PCOD8292630</u> | <u>0.2821</u> |               | 0.4037      | 0.4414        |              | 0.4338       |
| <u>PCOD8196363</u> | <u>0.2790</u> |               | 0.4053      | 0.4208        |              |              |
| <u>PCOD8200851</u> | <u>0.2936</u> |               | 0.4152      | 0.4019        |              |              |
| <u>PCOD8200684</u> | <u>0.2535</u> |               | 0.4049      | 0.3960        | 0.4588       |              |
| <u>PCOD8313092</u> | <u>0.2693</u> | 0.3282        | 0.3398      | <u>0.2945</u> |              |              |
| <u>PCOD8321996</u> | <u>0.2898</u> |               | 0.3401      |               |              |              |
| <u>PCOD8320054</u> | <u>0.2878</u> | 0.3560        | 0.3497      | 0.4425        |              |              |
| <u>PCOD8315654</u> | <u>0.2630</u> | 0.3699        | 0.3322      |               |              |              |
| <u>PCOD8261270</u> | <u>0.2822</u> |               | 0.4114      | 0.4474        |              |              |
| PCOD8319194        | 0.2971        |               | 0.3792      | 0.3791        |              |              |
| <u>PCOD8274922</u> | <u>0.2869</u> |               | 0.3709      | 0.4448        |              | 0.4472       |
| <u>PCOD8320524</u> | <u>0.2851</u> | 0.3552        | 0.4400      | 0.4472        |              |              |
| <u>PCOD8292620</u> | <u>0.2800</u> |               | 0.3891      | 0.4697        | 0.4214       | 0.4513       |
| <u>PCOD8327293</u> | <u>0.2865</u> | 0.4144        | 0.4073      | 0.3470        |              |              |
| <u>PCOD8322015</u> | <u>0.2794</u> | 0.3374        | 0.3033      |               |              |              |
| PCOD8327476        | 0.2947        | 0.4068        | 0.3383      | 0.3931        |              |              |
| <u>PCOD8323834</u> | <u>0.2668</u> | 0.3459        |             | 0.3587        |              |              |
| <u>PCOD8308288</u> | <u>0.2857</u> |               | 0.3956      | 0.4528        |              |              |
| <u>PCOD8307691</u> | <u>0.2829</u> | 0.3825        | 0.3985      | 0.4530        |              |              |
| PCOD8318323        | 0.2953        | 0.3568        | 0.4268      |               |              |              |
| PCOD8325055        | 0.2905        | 0.4052        | 0.3399      | 0.3926        |              |              |
| <u>PCOD8329781</u> | <u>0.2723</u> | 0.3394        | 0.3020      | 0.3344        |              |              |
| <u>PCOD8307129</u> | <u>0.2853</u> | 0.3825        | 0.3913      | 0.4534        |              |              |
| <u>PCOD8316367</u> | <u>0.2883</u> | 0.3475        | 0.4089      |               |              | 0.4695       |
| <u>PCOD8322022</u> | <u>0.2690</u> | <u>0.2750</u> | 0.3974      |               |              |              |
| <u>PCOD8200818</u> | <u>0.2858</u> |               | 0.4124      | 0.4033        |              |              |
| <u>PCOD8323191</u> | <u>0.2649</u> | 0.3413        | 0.4180      | 0.4636        |              |              |
| <u>PCOD8301757</u> | <u>0.2748</u> |               | 0.4072      | 0.4457        | 0.4451       |              |
| <u>PCOD8320103</u> | <u>0.2828</u> | 0.3808        |             | 0.4534        |              |              |
| <u>PCOD8309325</u> | <u>0.2858</u> | 0.3820        |             | 0.3505        |              |              |
| <u>PCOD8261275</u> | <u>0.2830</u> |               | 0.3836      | 0.4578        |              | 0.4389       |
| <u>PCOD8326900</u> | <u>0.2748</u> | 0.3576        | 0.3351      |               |              |              |
| <u>PCOD8196364</u> | <u>0.2774</u> |               | 0.4050      | 0.4203        |              |              |
| <u>PCOD8193831</u> | <u>0.2722</u> | 0.3531        | 0.4137      | 0.4397        |              | 0.4306       |
| <u>PCOD8196409</u> | <u>0.2714</u> |               | 0.3854      | 0.4240        |              | 0.4199       |
| <u>PCOD8307109</u> | <u>0.2620</u> |               | 0.3085      | 0.2946        |              |              |

| Structure code     | 4-Ring (nm)   | 5-Ring (nm) | 6-Ring (nm)   | 8-Ring (nm) | 10-Ring (nm) | 12-Ring (nm) |
|--------------------|---------------|-------------|---------------|-------------|--------------|--------------|
| <u>PCOD8196416</u> | <u>0.2782</u> |             | 0.4114        | 0.4263      |              |              |
| <u>PCOD8329412</u> | <u>0.2682</u> | 0.3363      | 0.3387        | 0.4527      |              |              |
| <u>PCOD8312657</u> | <u>0.2652</u> | 0.3863      | 0.3539        | 0.3810      |              |              |
| <u>PCOD8316869</u> | <u>0.2969</u> |             | 0.4021        | 0.3968      |              |              |
| <u>PCOD8196412</u> | <u>0.2881</u> |             | 0.3952        | 0.4350      |              |              |
| <u>PCOD8200870</u> | <u>0.2788</u> |             | 0.4288        | 0.4568      | 0.4483       | 0.4483       |
| <u>PCOD8200919</u> | <u>0.2874</u> |             | 0.4099        | 0.4033      |              |              |
| <u>PCOD8200940</u> | <u>0.2804</u> |             | 0.4177        | 0.4716      | 0.4309       | 0.4529       |
| <u>PCOD8323349</u> | <u>0.2934</u> |             | 0.4206        | 0.4449      |              |              |
| <u>PCOD8320017</u> | <u>0.2890</u> | 0.3882      | 0.4102        | 0.3863      |              |              |
| <u>PCOD8196419</u> | <u>0.2870</u> |             | 0.3908        | 0.4265      |              |              |
| <u>PCOD8328225</u> | <u>0.2901</u> | 0.3916      | 0.3681        | 0.4650      |              |              |
| <u>PCOD8329775</u> | <u>0.2606</u> | 0.3527      | 0.4067        | 0.4215      |              |              |
| <u>PCOD8196708</u> | <u>0.2705</u> |             | 0.3916        | 0.4485      |              | 0.4221       |
| <u>PCOD8315762</u> | <u>0.2841</u> | 0.4048      | 0.3561        | 0.4178      |              |              |
| <u>PCOD8316868</u> | <u>0.2804</u> |             | 0.4194        | 0.4668      |              | 0.4327       |
| <u>PCOD8196446</u> | <u>0.2735</u> |             | 0.3793        | 0.4218      |              |              |
| <u>PCOD8315708</u> | <u>0.2693</u> | 0.3516      | 0.4382        |             |              |              |
| <u>PCOD8324447</u> | <u>0.2719</u> | 0.3327      | 0.3180        |             |              |              |
| <u>PCOD8327278</u> | <u>0.2887</u> |             | 0.4258        | 0.4587      |              | 0.4464       |
| <u>PCOD8196712</u> | <u>0.2878</u> |             | 0.4024        | 0.4236      |              |              |
| <u>PCOD8200941</u> | <u>0.2847</u> |             | 0.4433        | 0.4056      |              |              |
| <u>PCOD8326718</u> | <u>0.2814</u> | 0.3827      | 0.3279        |             | 0.4535       |              |
| <u>PCOD8292641</u> | <u>0.2802</u> | 0.3676      | 0.4124        | 0.4689      |              | 0.4320       |
| <u>PCOD8196417</u> | <u>0.2773</u> |             | 0.4379        | 0.4266      |              |              |
| <u>PCOD8307383</u> | <u>0.2839</u> |             | 0.4121        | 0.4309      |              |              |
| <u>PCOD8298138</u> | <u>0.2865</u> | 0.4067      | 0.3362        | 0.3962      |              |              |
| <u>PCOD8265553</u> | <u>0.2461</u> |             | 0.3965        | 0.4403      | 0.4073       |              |
| <u>PCOD8255421</u> | <u>0.2792</u> | 0.3652      | 0.3884        |             |              | 0.4412       |
| <u>PCOD8310673</u> | <u>0.2732</u> | 0.3761      | 0.4075        | 0.4680      |              | 0.4392       |
| <u>PCOD8307474</u> | <u>0.2768</u> |             | 0.3505        | 0.4336      |              |              |
| <u>PCOD8255713</u> | <u>0.2722</u> |             | 0.3853        | 0.3993      |              |              |
| <u>PCOD8312377</u> | <u>0.2852</u> |             | 0.3555        | 0.4291      |              |              |
| <u>PCOD8265558</u> | <u>0.2892</u> | 0.4056      | 0.3386        | 0.3917      |              |              |
| <u>PCOD8317669</u> | <u>0.2891</u> |             | 0.3970        | 0.3956      |              |              |
| <u>PCOD8329746</u> | <u>0.2799</u> | 0.3478      | 0.4309        |             | 0.4528       |              |
| <u>PCOD8288252</u> | <u>0.2719</u> |             | 0.3819        | 0.3959      |              |              |
| <u>PCOD8292631</u> | <u>0.2779</u> | 0.3738      | 0.4118        | 0.4689      |              | 0.4293       |
| <u>PCOD8287200</u> | <u>0.2735</u> |             | 0.4150        | 0.4115      |              |              |
| <u>PCOD8316033</u> | <u>0.2927</u> | 0.3570      | 0.3252        | 0.4443      |              |              |
| <u>PCOD8313111</u> | <u>0.2540</u> |             | <u>0.2759</u> | 0.4253      |              |              |
| <u>PCOD8196694</u> | <u>0.2693</u> | 0.3110      | 0.3492        | 0.4208      |              | 0.4446       |
| <u>PCOD8307137</u> | <u>0.2902</u> |             | 0.3660        | 0.3090      |              |              |
| <u>PCOD8321916</u> | <u>0.2748</u> | 0.3500      | 0.3828        |             | 0.4540       |              |
| <u>PCOD8196447</u> | <u>0.2887</u> |             | 0.3975        | 0.4386      |              |              |
| <u>PCOD8316532</u> | <u>0.2742</u> | 0.3215      | 0.3335        | 0.4353      |              |              |
| <u>PCOD8297460</u> | <u>0.2953</u> |             | 0.3833        |             |              |              |
| <u>PCOD8316376</u> | <u>0.2731</u> | 0.3759      | 0.4006        | 0.3110      |              | 0.4985       |

| Structure code     | 4-Ring (nm)   | 5-Ring (nm) | 6-Ring (nm) | 8-Ring (nm) | 10-Ring (nm)  | 12-Ring (nm) |
|--------------------|---------------|-------------|-------------|-------------|---------------|--------------|
| <u>PCOD8326816</u> | <u>0.2773</u> | 0.3401      | 0.3808      |             | 0.4668        |              |
| <u>PCOD8307682</u> | <u>0.2877</u> | 0.3641      | 0.4125      | 0.4687      |               | 0.4165       |
| <u>PCOD8303097</u> | <u>0.2886</u> |             | 0.4099      | 0.4278      |               |              |
| <u>PCOD8316035</u> | <u>0.2914</u> |             | 0.3947      | 0.4351      |               |              |
| <u>PCOD8313398</u> | <u>0.2753</u> |             | 0.3552      | 0.4550      |               |              |
| <u>PCOD8319437</u> | <u>0.2706</u> | 0.3500      | 0.3558      |             |               |              |
| <u>PCOD8196713</u> | <u>0.2865</u> |             | 0.3910      | 0.4196      |               |              |
| <u>PCOD8329305</u> | <u>0.2723</u> |             | 0.3666      | 0.4624      |               |              |
| <u>PCOD8317985</u> | <u>0.2834</u> |             | 0.3810      | 0.4046      |               |              |
| <u>PCOD8196411</u> | <u>0.2892</u> |             | 0.3928      | 0.4280      |               |              |
| <u>PCOD8316043</u> | <u>0.2827</u> | 0.3315      | 0.4008      | 0.3804      | 0.4379        |              |
| <u>PCOD8312321</u> | <u>0.2751</u> | 0.3723      | 0.3082      | 0.4523      |               |              |
| <u>PCOD8304708</u> | <u>0.2751</u> |             | 0.3104      |             | <u>0.3399</u> |              |
| <u>PCOD8193833</u> | <u>0.2781</u> | 0.3542      | 0.4140      | 0.4234      |               |              |
| <u>PCOD8292632</u> | <u>0.2762</u> |             | 0.4196      | 0.4475      | 0.4368        | 0.4368       |
| <u>PCOD8316036</u> | <u>0.2777</u> | 0.3715      | 0.4426      | 0.4504      |               |              |
| <u>PCOD8328510</u> | <u>0.3104</u> | 0.3333      | 0.4021      | 0.4227      |               |              |
| <u>PCOD8312314</u> | <u>0.2837</u> | 0.3425      | 0.3223      | 0.3977      | 0.4639        |              |
| <u>PCOD8305122</u> | <u>0.2809</u> | 0.3483      | 0.3741      | 0.3741      |               |              |
| <u>PCOD8322944</u> | <u>0.2581</u> | 0.3370      | 0.4415      | 0.4632      |               |              |
| <u>PCOD8318338</u> | <u>0.2367</u> |             | 0.4402      |             | 0.4498        |              |
| <u>PCOD8328255</u> | <u>0.2741</u> |             | 0.4009      | 0.4113      |               |              |
| <u>PCOD8307972</u> | <u>0.3119</u> | 0.3233      | 0.3298      |             |               |              |
| <u>PCOD8313826</u> | <u>0.2757</u> | 0.3485      | 0.4130      |             |               | 0.4619       |
| <u>PCOD8307105</u> | <u>0.2810</u> | 0.3629      | 0.3818      |             | 0.4562        |              |
| <u>PCOD8328256</u> | <u>0.2878</u> |             | 0.3899      | 0.4062      |               |              |
| <u>PCOD8297639</u> | <u>0.2924</u> |             | 0.3933      |             |               |              |
| <u>PCOD8325006</u> | <u>0.2765</u> | 0.3186      | 0.3779      | 0.4084      |               |              |
| <u>PCOD8116632</u> | <u>0.2615</u> | 0.3785      | 0.4133      | 0.4314      |               |              |
| <u>PCOD8306633</u> | <u>0.2884</u> |             | 0.3512      | 0.4572      |               |              |
| <u>PCOD8316365</u> | <u>0.2923</u> | 0.3639      | 0.4081      |             |               |              |
| <u>PCOD8288096</u> | <u>0.2854</u> |             | 0.3732      | 0.4003      |               |              |
| <u>PCOD8194776</u> | <u>0.2906</u> | 0.3613      | 0.4022      | 0.4284      |               |              |
| <u>PCOD8317687</u> | <u>0.2772</u> | 0.3537      | 0.3873      |             |               | 0.4641       |
| <u>PCOD8324911</u> | <u>0.2829</u> |             | 0.4105      | 0.4130      |               |              |
| <u>PCOD8196714</u> | <u>0.2881</u> |             | 0.4005      | 0.4237      |               |              |
| <u>PCOD8196690</u> | <u>0.2848</u> | 0.3363      | 0.4088      | 0.4217      |               |              |
| <u>PCOD8275019</u> | <u>0.2942</u> |             | 0.4098      | 0.4601      |               |              |
| <u>PCOD8301771</u> | <u>0.2957</u> | 0.3439      |             | 0.3717      |               | 0.4343       |
| <u>PCOD8194775</u> | <u>0.2866</u> | 0.3507      | 0.4119      | 0.4175      |               |              |
| <u>PCOD8201049</u> | <u>0.2833</u> |             | 0.4092      | 0.4405      |               |              |
| <u>PCOD8287212</u> | <u>0.2734</u> | 0.3528      | 0.3925      | 0.4155      |               |              |
| <u>PCOD8330297</u> | <u>0.2830</u> | 0.4096      | 0.3799      | 0.4273      |               |              |
| <u>PCOD8287211</u> | <u>0.2735</u> | 0.3516      | 0.3756      | 0.4040      |               |              |
| <u>PCOD8297228</u> | <u>0.2815</u> | 0.3817      | 0.3265      | 0.3265      |               |              |
| <u>PCOD8200993</u> | <u>0.2802</u> |             | 0.4206      | 0.4715      | 0.4276        | 0.4493       |
| <u>PCOD8315647</u> | <u>0.2788</u> | 0.3773      | 0.3427      | 0.4253      |               |              |
| <u>PCOD8297227</u> | <u>0.2920</u> | 0.3832      | 0.3287      | 0.3287      |               |              |

| Structure code     | 4-Ring (nm)   | 5-Ring (nm)   | 6-Ring (nm)   | 8-Ring (nm) | 10-Ring (nm) | 12-Ring (nm) |
|--------------------|---------------|---------------|---------------|-------------|--------------|--------------|
| <u>PCOD8301799</u> | <u>0.2838</u> | 0.4020        | 0.4122        | 0.3443      |              |              |
| <u>PCOD8274967</u> | <u>0.2870</u> |               | 0.4007        | 0.4398      |              | 0.4464       |
| <u>PCOD8322792</u> | <u>0.2770</u> |               | 0.3652        | 0.4188      |              |              |
| <u>PCOD8275427</u> | <u>0.2899</u> | 0.3738        | 0.3233        | 0.3233      |              |              |
| <u>PCOD8307101</u> | <u>0.2756</u> | <u>0.2995</u> | 0.3576        |             |              |              |
| <u>PCOD8255618</u> | <u>0.2736</u> |               | 0.3741        | 0.4143      |              |              |
| <u>PCOD8274173</u> | <u>0.2894</u> | 0.3476        | 0.3175        | 0.3405      |              |              |
| <u>PCOD8288100</u> | <u>0.2728</u> | 0.3485        | 0.3830        | 0.3948      |              |              |
| <u>PCOD8312121</u> | <u>0.2775</u> | 0.3713        | 0.3437        | 0.4116      |              |              |
| <u>PCOD8275276</u> | <u>0.2905</u> | 0.3744        | 0.3122        | 0.3122      |              |              |
| <u>PCOD8297400</u> | <u>0.2896</u> | 0.3778        | 0.3287        | 0.3287      |              |              |
| <u>PCOD8265260</u> | 0.2905        | 0.3658        | 0.3293        | 0.3297      |              |              |
| <u>PCOD8297423</u> | <u>0.2776</u> | 0.3502        | <u>0.2957</u> | 0.4414      |              |              |
| <u>PCOD8324833</u> | <u>0.2807</u> |               | 0.3725        | 0.4005      |              |              |
| <u>PCOD8196413</u> | <u>0.2873</u> |               | 0.3979        | 0.4280      |              |              |
| <u>PCOD8288108</u> | <u>0.2727</u> | 0.3472        | 0.3989        | 0.3933      |              |              |
| <u>PCOD8298127</u> | <u>0.2900</u> | 0.3792        | 0.3435        | 0.3175      |              |              |
| <u>PCOD8275748</u> | <u>0.2864</u> | 0.3559        | 0.3191        | 0.4457      |              |              |
| <u>PCOD8299383</u> | <u>0.2851</u> |               | 0.3485        | 0.4434      |              |              |
| <u>PCOD8275707</u> | <u>0.2879</u> | 0.3567        | 0.3205        | 0.4457      |              |              |
| <u>PCOD8196698</u> | <u>0.2874</u> | 0.3102        | 0.3490        | 0.4216      |              |              |
| <u>PCOD8316327</u> | <u>0.2887</u> | 0.3808        | 0.3749        | 0.3885      | 0.4872       |              |
| <u>PCOD8321872</u> | <u>0.2848</u> | 0.3824        | 0.4439        | 0.4012      |              |              |
| <u>PCOD8318347</u> | <u>0.2880</u> | 0.3279        | 0.3950        |             |              | 0.4570       |
| <u>PCOD8276280</u> | 0.2970        | 0.3377        |               | 0.3486      |              |              |
| <u>PCOD8292926</u> | <u>0.2728</u> |               | 0.3861        | 0.4017      |              |              |
| <u>PCOD8196448</u> | <u>0.2893</u> |               | 0.3936        | 0.4266      |              |              |
| <u>PCOD8287203</u> | <u>0.2738</u> |               | 0.3849        | 0.4095      |              |              |
| <u>PCOD8323380</u> | <u>0.2802</u> | 0.3275        | 0.3307        |             | 0.4700       |              |
| <u>PCOD8277636</u> | <u>0.2824</u> |               | 0.3620        | 0.4081      |              |              |
| <u>PCOD8255720</u> | <u>0.2733</u> |               | 0.3960        | 0.4080      |              |              |
| <u>PCOD8193832</u> | <u>0.2762</u> | 0.3546        | 0.4080        | 0.4270      |              | 0.4311       |
| <u>PCOD8287166</u> | <u>0.2875</u> |               | 0.3831        | 0.4280      |              |              |
| <u>PCOD8308290</u> | <u>0.2878</u> |               | 0.4262        | 0.4005      |              |              |
| <u>PCOD8287156</u> | <u>0.2688</u> | 0.3246        | 0.4042        | 0.3956      | 0.4447       |              |
| <u>PCOD8298160</u> | <u>0.2675</u> | 0.3651        | 0.3533        | 0.4505      | 0.4409       |              |
| <u>PCOD8297421</u> | <u>0.2873</u> |               | 0.3993        | 0.4281      |              |              |
| <u>PCOD8255661</u> | <u>0.2730</u> |               | 0.3834        | 0.3976      |              |              |
| <u>PCOD8322639</u> | <u>0.2822</u> | 0.3806        | 0.3492        | 0.4512      |              |              |
| <u>PCOD8200852</u> | 0.2924        |               | 0.4164        | 0.4026      |              |              |
| <u>PCOD8316048</u> | <u>0.2841</u> | 0.3201        | 0.3844        | 0.3955      |              |              |
| <u>PCOD8195611</u> | <u>0.2890</u> | 0.3647        | 0.4115        | 0.4469      |              |              |
| <u>PCOD8323357</u> | <u>0.2797</u> | 0.3730        | 0.3563        | 0.4269      |              |              |
| <u>PCOD8194009</u> | <u>0.2762</u> | 0.3471        | 0.4129        | 0.4377      |              |              |
| <u>PCOD8288182</u> | <u>0.2743</u> | 0.3466        | 0.3673        | 0.3832      |              |              |
| <u>PCOD8327491</u> | <u>0.2776</u> |               | 0.3984        | 0.3852      |              |              |
| <u>PCOD8256582</u> | <u>0.2736</u> |               | 0.3560        | 0.4033      |              |              |
| <u>PCOD8274203</u> | 0.2906        |               | 0.3707        | 0.4022      |              |              |



| Structure code     | 4-Ring (nm)   | 5-Ring (nm)   | 6-Ring (nm) | 8-Ring (nm) | 10-Ring (nm) | 12-Ring (nm) |
|--------------------|---------------|---------------|-------------|-------------|--------------|--------------|
| <u>PCOD8056809</u> | <u>0.2616</u> | 0.3169        | 0.3181      | 0.3480      |              |              |
| <u>PCOD8292736</u> | <u>0.2839</u> |               | 0.4024      | 0.4389      | 0.4458       | 0.4458       |
| <u>PCOD8323374</u> | <u>0.2857</u> | 0.3737        | 0.4314      | 0.3719      |              |              |
| <u>PCOD8193824</u> | <u>0.2758</u> | 0.3511        | 0.4106      | 0.4289      |              | 0.4515       |
| <u>PCOD8275094</u> | <u>0.2771</u> | 0.3904        | 0.4051      |             | 0.4611       |              |
| <u>PCOD8275711</u> | <u>0.2884</u> |               | 0.3689      | 0.4123      |              |              |
| <u>PCOD8323375</u> | <u>0.2832</u> | 0.3735        | 0.3691      | 0.3906      |              |              |
| <u>PCOD8256588</u> | <u>0.2745</u> |               | 0.3591      | 0.4000      |              |              |
| <u>PCOD8193821</u> | <u>0.2811</u> | 0.3576        | 0.3984      | 0.4546      |              |              |
| <u>PCOD8193996</u> | <u>0.2866</u> | 0.3470        | 0.4095      | 0.4297      |              |              |
| <u>PCOD8327934</u> | <u>0.2683</u> |               | 0.3685      |             |              |              |
| <u>PCOD8256627</u> | <u>0.2759</u> | 0.3360        | 0.3777      | 0.3710      |              |              |
| <u>PCOD8275789</u> | <u>0.2826</u> |               | 0.3636      | 0.3992      |              |              |
| <u>PCOD8317398</u> | <u>0.2885</u> |               | 0.4182      | 0.4252      |              |              |
| <u>PCOD8307693</u> | <u>0.2830</u> | 0.3565        | 0.4238      | 0.4654      | 0.4207       |              |
| <u>PCOD8314888</u> | <u>0.2853</u> | 0.3475        | 0.4120      | 0.4516      |              | 0.4123       |
| <u>PCOD8288254</u> | <u>0.2840</u> |               | 0.3739      | 0.4106      |              |              |
| <u>PCOD8311099</u> | 0.2922        | 0.3759        | 0.4347      | 0.4864      | 0.4179       |              |
| <u>PCOD8255716</u> | <u>0.2897</u> |               | 0.3833      |             |              |              |
| <u>PCOD8167045</u> | <u>0.2649</u> | 0.3424        | 0.3694      | 0.4312      |              |              |
| <u>PCOD8328373</u> | <u>0.2892</u> | 0.3770        | 0.3670      | 0.4541      |              | 0.5094       |
| <u>PCOD8194777</u> | <u>0.2843</u> | 0.3511        | 0.4107      | 0.4019      |              |              |
| <u>PCOD8316639</u> | <u>0.2827</u> |               | 0.3945      | 0.4472      |              |              |
| <u>PCOD8287229</u> | <u>0.2775</u> | <u>0.2985</u> | 0.4011      | 0.4051      | 0.3960       |              |
| <u>PCOD8317982</u> | <u>0.2862</u> |               | 0.4107      | 0.4223      |              |              |
| <u>PCOD8194963</u> | <u>0.2872</u> | 0.3589        | 0.4106      | 0.4199      |              |              |
| <u>PCOD8292723</u> | <u>0.2828</u> | 0.3623        | 0.3839      |             | 0.4418       | 0.4448       |
| <u>PCOD8309987</u> | <u>0.2784</u> | 0.3233        | 0.4368      |             |              |              |
| <u>PCOD8327305</u> | 0.3010        | 0.3821        | 0.3873      |             |              | 0.4738       |
| <u>PCOD8292725</u> | <u>0.2831</u> | 0.3559        | 0.4131      | 0.4715      | 0.4080       |              |
| <u>PCOD8325399</u> | 0.2996        | 0.3824        | 0.3856      |             |              | 0.4738       |
| <u>PCOD8265609</u> | 0.2959        | 0.3543        | 0.3745      | 0.4478      |              |              |
| <u>PCOD8275720</u> | <u>0.2831</u> |               | 0.3600      | 0.3989      |              |              |
| <u>PCOD8255657</u> | 0.2917        | 0.3465        | 0.3791      | 0.4309      |              |              |
| <u>PCOD8307183</u> | <u>0.2883</u> |               | 0.3973      | 0.4252      |              |              |
| <u>PCOD8195612</u> | 0.2911        | 0.3672        | 0.4121      | 0.4423      |              |              |
| <u>PCOD8289711</u> | <u>0.2853</u> |               | 0.4375      | 0.4127      |              |              |
| <u>PCOD8286879</u> | <u>0.2729</u> | 0.3674        | 0.4085      | 0.4669      | 0.4359       |              |
| <u>PCOD8288147</u> | 0.2902        |               | 0.3427      | 0.4141      |              |              |
| <u>PCOD8322931</u> | <u>0.2857</u> |               | 0.4040      | 0.3690      |              |              |
| <u>PCOD8330275</u> | 0.2961        | 0.3786        | 0.4025      |             |              | 0.4629       |
| <u>PCOD8297402</u> | <u>0.2861</u> |               | 0.3927      | 0.4238      |              |              |
| <u>PCOD8196467</u> | <u>0.2852</u> | 0.3241        | 0.3735      | 0.4160      |              |              |
| <u>PCOD8309151</u> | <u>0.2882</u> | 0.3863        | 0.3721      | 0.4052      |              |              |
| <u>PCOD8194964</u> | <u>0.2872</u> | 0.3458        | 0.4141      | 0.3981      |              |              |
| <u>PCOD8196422</u> | <u>0.2857</u> |               | 0.3929      | 0.4243      |              |              |
| <u>PCOD8292735</u> | 0.2980        | 0.3368        | 0.4125      | 0.4249      | 0.4429       | 0.4429       |
| <u>PCOD8196428</u> | <u>0.2864</u> |               | 0.3929      | 0.4234      |              |              |

| Structure code     | 4-Ring (nm)   | 5-Ring (nm)   | 6-Ring (nm) | 8-Ring (nm) | 10-Ring (nm) | 12-Ring (nm) |
|--------------------|---------------|---------------|-------------|-------------|--------------|--------------|
| PCOD8193988        | 0.2928        | 0.3599        | 0.4119      | 0.4313      |              |              |
| PCOD8195613        | 0.2941        | 0.3528        | 0.4080      | 0.4518      |              |              |
| <u>PCOD8286925</u> | <u>0.2721</u> | 0.3492        | 0.4098      | 0.4599      | 0.4473       |              |
| <u>PCOD8160775</u> | <u>0.2665</u> | 0.3214        | 0.3583      |             |              |              |
| <u>PCOD8297424</u> | <u>0.2790</u> |               | 0.3928      | 0.4430      |              |              |
| <u>PCOD8328266</u> | <u>0.2860</u> |               | 0.3972      | 0.3655      |              |              |
| <u>PCOD8307692</u> | <u>0.2854</u> | 0.3561        | 0.4108      | 0.4755      | 0.3956       |              |
| <u>PCOD8194772</u> | <u>0.2797</u> | 0.3551        | 0.3979      | 0.4137      |              |              |
| <u>PCOD8320075</u> | <u>0.2778</u> | 0.3273        | 0.3493      | 0.3691      |              |              |
| PCOD8287165        | 0.2953        | 0.3014        | 0.3819      | 0.4139      |              |              |
| <u>PCOD8330350</u> | <u>0.2623</u> | 0.3347        | 0.4147      | 0.4313      |              |              |
| <u>PCOD8193825</u> | <u>0.2789</u> | 0.3517        | 0.4200      | 0.4385      |              | 0.4423       |
| <u>PCOD8292652</u> | <u>0.2868</u> |               | 0.4005      | 0.4420      |              | 0.4494       |
| <u>PCOD8331110</u> | <u>0.2695</u> | 0.3694        | 0.2958      | 0.4096      |              | 0.4732       |
| <u>PCOD8200942</u> | <u>0.2859</u> |               | 0.4149      | 0.4031      |              |              |
| <u>PCOD8256583</u> | <u>0.2881</u> |               | 0.3724      | 0.4285      |              |              |
| PCOD8265568        | 0.2939        |               | 0.3868      | 0.4463      |              |              |
| <u>PCOD8196461</u> | <u>0.2843</u> | 0.3347        | 0.3946      | 0.4110      |              |              |
| PCOD8287111        | 0.2905        | 0.3509        | 0.3955      |             |              | 0.4290       |
| <u>PCOD8207798</u> | <u>0.2834</u> | 0.3257        | 0.3231      | 0.3981      |              |              |
| PCOD8256584        | 0.2910        |               | 0.4013      | 0.4091      |              |              |
| <u>PCOD8287218</u> | <u>0.2862</u> | 0.3489        | 0.4038      |             | 0.4768       |              |
| PCOD8313426        | 0.2936        | 0.3068        | 0.3191      |             |              |              |
| PCOD8195610        | 0.2932        | 0.3547        | 0.4002      | 0.4438      |              |              |
| <u>PCOD8255656</u> | <u>0.2878</u> |               | 0.3864      | 0.4272      |              |              |
| PCOD8265696        | 0.2939        |               | 0.4026      | 0.4099      |              |              |
| <u>PCOD8312122</u> | <u>0.2758</u> | 0.3372        | 0.3316      | 0.4137      |              |              |
| <u>PCOD8320052</u> | <u>0.2874</u> | 0.3597        | 0.3854      | 0.4721      | 0.4595       |              |
| PCOD8323836        | 0.2912        |               | 0.3347      |             |              | 0.4670       |
| <u>PCOD8298162</u> | <u>0.2806</u> |               | 0.3885      | 0.3934      |              |              |
| <u>PCOD8275115</u> | <u>0.2896</u> |               | 0.4218      | 0.4052      |              |              |
| PCOD8194967        | 0.2923        | 0.3601        | 0.4127      | 0.4269      |              |              |
| <u>PCOD8193851</u> | <u>0.2749</u> | 0.3547        | 0.4134      | 0.4341      |              | 0.4398       |
| PCOD8298141        | 0.2902        | 0.3508        | 0.3724      | 0.3988      |              |              |
| PCOD8329329        | 0.2933        |               | 0.4198      | 0.3321      |              | 0.5144       |
| <u>PCOD8194011</u> | <u>0.2860</u> | 0.3500        | 0.4095      | 0.4285      |              |              |
| <u>PCOD8298135</u> | <u>0.2758</u> |               | 0.3746      | 0.4016      |              |              |
| <u>PCOD8329327</u> | <u>0.2727</u> | 0.3607        | 0.3723      | 0.3282      |              | 0.5017       |
| <u>PCOD8308133</u> | <u>0.2832</u> |               | 0.3700      | 0.4624      |              |              |
| PCOD8328231        | 0.2919        | 0.3788        | 0.3198      | 0.3198      |              | 0.5027       |
| PCOD8274923        | 0.2906        |               | 0.4162      | 0.4025      |              |              |
| <u>PCOD8314793</u> | <u>0.2895</u> | <u>0.2902</u> | 0.3611      |             |              |              |
| <u>PCOD8314890</u> | <u>0.2778</u> | 0.3457        | 0.4162      | 0.4501      |              |              |
| <u>PCOD8269770</u> | <u>0.2862</u> |               | 0.3942      | 0.4217      |              |              |
| PCOD8311295        | 0.2910        | 0.3065        | 0.3931      |             |              |              |
| <u>PCOD8288263</u> | <u>0.2857</u> | 0.3347        | 0.4024      | 0.4027      |              |              |
| PCOD8303095        | 0.2911        | 0.3702        | 0.3284      | 0.4823      |              |              |
| <u>PCOD8288101</u> | <u>0.2869</u> |               | 0.3699      | 0.4233      |              |              |

| Structure code     | 4-Ring (nm)   | 5-Ring (nm)   | 6-Ring (nm) | 8-Ring (nm)   | 10-Ring (nm) | 12-Ring (nm) |
|--------------------|---------------|---------------|-------------|---------------|--------------|--------------|
| <u>PCOD8287396</u> | <u>0.2870</u> | 0.3429        | 0.3711      | 0.3711        |              |              |
| <u>PCOD8060369</u> | <u>0.2755</u> | 0.3626        | 0.3245      |               |              |              |
| <u>PCOD8328754</u> | <u>0.2790</u> |               | 0.4084      |               |              |              |
| <u>PCOD8196703</u> | <u>0.2862</u> | 0.3141        | 0.3489      | 0.4333        |              |              |
| <u>PCOD8197313</u> | <u>0.2884</u> | 0.3220        | 0.3665      | 0.4273        |              |              |
| <u>PCOD8265550</u> | <u>0.2734</u> | <u>0.2988</u> | 0.4069      | 0.3902        | 0.4254       |              |
| <u>PCOD8303406</u> | <u>0.2659</u> |               | 0.3721      | 0.4198        |              |              |
| <u>PCOD8301801</u> | 0.3060        | 0.3419        | 0.4193      | 0.3714        |              | 0.4611       |
| <u>PCOD8256590</u> | <u>0.2857</u> |               | 0.3654      | 0.4001        |              |              |
| <u>PCOD8195289</u> | <u>0.2830</u> | 0.3630        | 0.4033      | 0.4293        |              |              |
| <u>PCOD8325423</u> | 0.3241        | 0.3410        | 0.3663      | 0.4304        |              |              |
| <u>PCOD8265317</u> | <u>0.2777</u> | 0.3149        | 0.3747      |               | 0.4709       |              |
| <u>PCOD8196488</u> | 0.2943        |               | 0.3819      | 0.4429        |              |              |
| <u>PCOD8292270</u> | <u>0.2858</u> |               | 0.3699      | 0.4040        |              |              |
| <u>PCOD8196716</u> | <u>0.2867</u> |               | 0.3905      | 0.4200        |              |              |
| <u>PCOD8197302</u> | <u>0.2851</u> | 0.3366        | 0.4210      | 0.4200        |              |              |
| <u>PCOD8265707</u> | <u>0.2747</u> | 0.2917        | 0.3995      | 0.4243        | 0.4386       |              |
| <u>PCOD8326837</u> | 0.3072        | 0.3309        | 0.3710      |               |              | 0.4763       |
| <u>PCOD8328645</u> | <u>0.2743</u> |               | 0.3712      | 0.3712        |              | 0.5016       |
| <u>PCOD8317699</u> | <u>0.2742</u> | 0.3587        | 0.3948      |               |              |              |
| <u>PCOD8275237</u> | 0.2967        | 0.3191        | 0.3657      |               | 0.4578       |              |
| <u>PCOD8293227</u> | <u>0.2855</u> |               | 0.3699      | 0.4126        |              |              |
| <u>PCOD8265151</u> | <u>0.2853</u> | 0.3530        | 0.4077      | 0.3633        |              | 0.4829       |
| <u>PCOD8275122</u> | 0.2985        | 0.3370        | 0.4121      | 0.4331        | 0.4447       | 0.4447       |
| <u>PCOD8196700</u> | <u>0.2852</u> | 0.3310        | 0.3822      | 0.4200        |              |              |
| <u>PCOD8195290</u> | <u>0.2828</u> | 0.3512        | 0.4018      | 0.4089        |              |              |
| <u>PCOD8323838</u> | 0.3356        |               | 0.3715      | 0.3498        |              | 0.4776       |
| <u>PCOD8298125</u> | 0.2968        |               | 0.3571      | 0.4190        |              |              |
| <u>PCOD8267100</u> | <u>0.2898</u> |               | 0.3515      | 0.4655        |              |              |
| <u>PCOD8315812</u> | <u>0.2584</u> |               | 0.4121      | 0.4139        |              |              |
| <u>PCOD8256706</u> | <u>0.2807</u> |               | 0.3535      | 0.4026        |              |              |
| <u>PCOD8275117</u> | <u>0.2898</u> |               | 0.4206      | 0.4046        |              |              |
| <u>PCOD8297293</u> | 0.2910        | 0.3155        | 0.4283      | 0.4510        |              |              |
| <u>PCOD8287179</u> | <u>0.2890</u> | 0.3363        | 0.4058      | 0.3605        | 0.3605       |              |
| <u>PCOD8299421</u> | 0.2985        | 0.3327        | 0.4121      | 0.4345        |              |              |
| <u>PCOD8265367</u> | <u>0.2736</u> | 0.3280        | 0.4149      |               | 0.4220       |              |
| <u>PCOD8275293</u> | <u>0.2704</u> |               | 0.3716      |               |              |              |
| <u>PCOD8328391</u> | <u>0.2763</u> | 0.3744        | 0.3942      | <u>0.2997</u> |              |              |
| <u>PCOD8266160</u> | 0.3018        | <u>0.2910</u> | 0.3681      | 0.3926        |              |              |
| <u>PCOD8269892</u> | 0.2905        |               | 0.3925      | 0.4479        |              |              |
| <u>PCOD8319324</u> | <u>0.2869</u> | 0.3499        | 0.4273      | 0.3684        |              |              |
| <u>PCOD8200214</u> | <u>0.2814</u> | 0.3421        | 0.4034      | 0.4226        |              |              |
| <u>PCOD8328215</u> | 0.3440        |               | 0.3615      | 0.3495        |              | 0.4130       |
| <u>PCOD8256619</u> | <u>0.2826</u> |               | 0.3503      | 0.4038        |              |              |
| <u>PCOD8328398</u> | <u>0.2893</u> |               | 0.3780      | 0.4364        | 0.4613       | 0.4977       |
| <u>PCOD8197948</u> | <u>0.2840</u> | 0.3166        | 0.3663      | 0.4088        |              |              |
| <u>PCOD8224235</u> | <u>0.2633</u> | 0.3273        | 0.3437      |               |              |              |
| <u>PCOD8329311</u> | <u>0.2898</u> |               | 0.4042      | 0.4680        |              |              |

| Structure code     | 4-Ring (nm)   | 5-Ring (nm)   | 6-Ring (nm) | 8-Ring (nm) | 10-Ring (nm) | 12-Ring (nm) |
|--------------------|---------------|---------------|-------------|-------------|--------------|--------------|
| <u>PCOD8255636</u> | <u>0.2891</u> | 0.3332        | 0.4118      | 0.4181      | 0.3589       |              |
| <u>PCOD8207198</u> | 0.2903        | 0.3102        | 0.3506      | 0.3913      |              |              |
| <u>PCOD8287889</u> | 0.3086        | <u>0.2992</u> | 0.3890      | 0.4202      |              |              |
| <u>PCOD8275434</u> | 0.2970        | 0.3037        | 0.2871      | 0.4316      |              |              |
| <u>PCOD8328938</u> | <u>0.2791</u> |               | 0.3543      | 0.4466      |              | 0.5092       |
| <u>PCOD8256599</u> | <u>0.2888</u> | 0.3310        | 0.4068      | 0.3566      |              |              |
| <u>PCOD8266000</u> | <u>0.2763</u> | 0.3442        | 0.4147      | 0.4289      |              |              |
| <u>PCOD8267108</u> | <u>0.2863</u> | 0.3520        | 0.3990      | 0.3939      |              |              |
| <u>PCOD8297653</u> | <u>0.2738</u> | 0.3593        | 0.3812      | 0.4484      |              |              |
| <u>PCOD8298176</u> | <u>0.2730</u> | 0.3624        | 0.3634      | 0.4485      | 0.4550       |              |
| <u>PCOD8297464</u> | 0.2939        |               | 0.3690      | 0.4256      |              |              |
| <u>PCOD8330346</u> | 0.2924        |               | 0.4051      | 0.4377      |              |              |
| <u>PCOD8195614</u> | 0.2956        |               | 0.3975      | 0.4503      |              |              |
| <u>PCOD8275569</u> | <u>0.2823</u> | 0.3386        | 0.3038      | 0.3275      |              |              |
| <u>PCOD8172248</u> | <u>0.2774</u> | 0.3790        | 0.3898      | 0.3033      |              |              |
| <u>PCOD8217478</u> | <u>0.2615</u> | 0.3379        | 0.3769      |             |              |              |
| <u>PCOD8265628</u> | <u>0.2837</u> | 0.3146        | 0.3019      | 0.3019      |              |              |
| <u>PCOD8299431</u> | 0.3011        | 0.3186        | 0.4169      | 0.3309      |              |              |
| <u>PCOD8255669</u> | <u>0.2890</u> | 0.3357        | 0.4085      | 0.3605      |              |              |
| <u>PCOD8307695</u> | 0.3140        |               | 0.3309      | 0.4336      |              | 0.4744       |
| <u>PCOD8200326</u> | 0.2913        | 0.3336        | 0.4101      | 0.4294      |              |              |
| <u>PCOD8059486</u> | <u>0.2778</u> |               | 0.3514      | 0.4569      |              |              |
| <u>PCOD8293232</u> | <u>0.2891</u> | 0.4142        | 0.3265      | 0.3534      |              |              |
| <u>PCOD8309154</u> | 0.3354        |               | 0.3384      |             |              | 0.4811       |
| <u>PCOD8275433</u> | <u>0.2852</u> | 0.3226        | 0.4272      | 0.3712      |              |              |
| <u>PCOD8267700</u> | <u>0.2731</u> | 0.3004        | 0.3711      | 0.3782      | 0.4030       |              |
| <u>PCOD8325760</u> | 0.2902        |               | 0.3341      |             |              | 0.4975       |
| <u>PCOD8297555</u> | 0.2980        | 0.3226        | 0.3441      | 0.3449      |              |              |
| <u>PCOD8328689</u> | 0.2924        | 0.3644        | 0.3941      | 0.4452      |              | 0.5145       |
| <u>PCOD8312182</u> | 0.3307        | 0.3151        | 0.3008      | 0.2935      |              |              |
| <u>PCOD8255541</u> | 0.3056        | 0.3141        | 0.4185      | 0.4150      |              |              |
| <u>PCOD8271001</u> | <u>0.2888</u> | 0.3504        | 0.4064      | 0.4406      |              |              |
| <u>PCOD8292946</u> | <u>0.2875</u> | 0.3318        | 0.4019      | 0.3638      |              |              |
| <u>PCOD8268839</u> | <u>0.2879</u> | 0.3485        | 0.3892      | 0.4438      |              |              |
| <u>PCOD8316520</u> | 0.3232        | 0.3410        | 0.3671      | 0.4156      |              | 0.5006       |
| <u>PCOD8256296</u> | 0.2934        | 0.3222        | 0.4051      | 0.3744      |              |              |
| <u>PCOD8325449</u> | 0.3399        | <u>0.2870</u> | 0.3431      |             |              |              |
| <u>PCOD8319320</u> | 0.2906        | 0.3364        | 0.3817      | 0.4167      |              | 0.4404       |
| <u>PCOD8287561</u> | <u>0.2795</u> | 0.3062        | 0.3787      | 0.4029      |              |              |
| <u>PCOD8327295</u> | 0.3299        |               | 0.3752      | 0.3236      |              | 0.4887       |
| <u>PCOD8266162</u> | 0.2971        | 0.3276        | 0.4114      | 0.4170      |              |              |
| <u>PCOD8314904</u> | <u>0.2762</u> | 0.3333        | 0.3807      | 0.4192      |              | 0.4425       |
| <u>PCOD8297297</u> | 0.2985        | 0.3225        | 0.3975      | 0.3718      |              | 0.4197       |
| <u>PCOD8275449</u> | 0.2937        | 0.3202        | 0.3887      | 0.3335      |              |              |
| <u>PCOD8287401</u> | 0.3107        | 0.3190        | 0.3359      | 0.4244      |              |              |
| <u>PCOD8297441</u> | 0.2917        | 0.3204        | 0.4106      | 0.3412      |              |              |
| <u>PCOD8307496</u> | 0.3080        | 0.3442        | 0.4176      | 0.4455      |              |              |
| <u>PCOD8323479</u> | <u>0.2748</u> |               | 0.3326      | 0.4541      |              | 0.5023       |

| Structure code     | 4-Ring (nm)   | 5-Ring (nm)   | 6-Ring (nm)   | 8-Ring (nm) | 10-Ring (nm) | 12-Ring (nm)  |
|--------------------|---------------|---------------|---------------|-------------|--------------|---------------|
| PCOD8297785        | 0.2957        | 0.3260        | 0.4131        | 0.4219      |              |               |
| PCOD8288490        | 0.2930        | 0.3051        | 0.3842        | 0.3907      | 0.3949       |               |
| <u>PCOD8292952</u> | <u>0.2876</u> | 0.3291        | 0.4012        | 0.3606      |              |               |
| <u>PCOD8297501</u> | <u>0.2861</u> | <u>0.2959</u> | 0.3688        | 0.3372      |              |               |
| PCOD8323497        | 0.2918        | 0.3590        | 0.3818        | 0.4397      |              | 0.5105        |
| PCOD8323427        | 0.2914        | 0.3577        | 0.3843        |             | 0.4510       |               |
| PCOD8330370        | 0.2925        | 0.3568        | 0.3841        | 0.4275      | 0.4515       |               |
| <u>PCOD8329430</u> | <u>0.2777</u> | 0.3963        | 0.3172        | 0.4465      |              |               |
| PCOD8287380        | 0.2948        |               | 0.3709        |             |              |               |
| PCOD8330339        | 0.3030        |               | 0.3895        |             |              |               |
| PCOD8265454        | 0.2934        | 0.3518        | 0.3946        |             |              | 0.4231        |
| <u>PCOD8287569</u> | <u>0.2729</u> | 0.3266        | 0.3865        | 0.4574      |              |               |
| <u>PCOD8275130</u> | <u>0.2900</u> |               | 0.4199        | 0.4040      |              |               |
| PCOD8329341        | 0.3095        |               |               | 0.4492      |              | 0.4935        |
| <u>PCOD8167047</u> | <u>0.2722</u> | 0.3242        | 0.3358        |             |              |               |
| <u>PCOD8330289</u> | <u>0.2710</u> |               | 0.3338        |             |              | 0.4861        |
| <u>PCOD8193855</u> | <u>0.2871</u> |               | 0.3841        | 0.4194      |              | 0.4545        |
| PCOD8258256        | 0.2935        | 0.3319        | 0.4125        | 0.4382      | 0.4112       |               |
| PCOD8314357        | 0.3000        | 0.3269        | 0.3539        |             |              | 0.4915        |
| PCOD8327944        | 0.3074        | 0.3163        | 0.3636        | 0.3959      |              |               |
| <u>PCOD8292750</u> | <u>0.2831</u> |               | 0.4020        | 0.4419      | 0.4499       | 0.4499        |
| PCOD8084708        | 0.2973        | 0.3271        | 0.3229        |             |              | 0.4695        |
| <u>PCOD8315717</u> | <u>0.2617</u> | 0.3639        | 0.3289        | 0.4445      |              |               |
| PCOD8277571        | 0.2936        | 0.3059        | 0.3925        | 0.3408      |              |               |
| <u>PCOD8288185</u> | <u>0.2809</u> | <u>0.2873</u> | 0.3208        |             |              |               |
| PCOD8322647        | 0.3282        | 0.3468        | 0.4108        | 0.4288      |              |               |
| <u>PCOD8255673</u> | <u>0.2745</u> | 0.3716        | 0.3315        |             |              |               |
| PCOD8177390        | 0.2967        |               | 0.3914        | 0.4241      |              |               |
| <u>PCOD8275859</u> | <u>0.2822</u> | 0.3061        | 0.3848        | 0.3647      |              |               |
| PCOD8250146        | 0.2954        |               | 0.3855        | 0.4231      | 0.3884       |               |
| PCOD8182441        | 0.2954        |               | 0.3874        | 0.4238      |              |               |
| PCOD8194789        | 0.2929        | 0.3521        | 0.3943        | 0.4079      |              |               |
| PCOD8321687        | 0.3374        |               | 0.3657        |             |              |               |
| <u>PCOD8177901</u> | <u>0.2863</u> |               | 0.3938        | 0.4374      |              |               |
| PCOD8323210        | 0.3372        |               | 0.3636        |             | 0.4529       | 0.4899        |
| <u>PCOD8195078</u> | <u>0.2878</u> |               | 0.4029        | 0.4332      |              | 0.4688        |
| <u>PCOD8275951</u> | <u>0.2820</u> | 0.3219        | <u>0.2667</u> | 0.3799      |              |               |
| <u>PCOD8195292</u> | <u>0.2859</u> | 0.3505        | 0.3982        | 0.3870      |              |               |
| <u>PCOD8267707</u> | <u>0.2806</u> | 0.3392        | 0.3794        | 0.3862      |              |               |
| <u>PCOD8239101</u> | <u>0.2783</u> | 0.3573        | 0.3183        | 0.4446      |              |               |
| PCOD8324829        | 0.3551        | 0.3358        |               |             |              | 0.4692        |
| PCOD8287405        | 0.2951        | 0.3144        | 0.3482        | 0.3454      |              |               |
| <u>PCOD8270297</u> | <u>0.2870</u> | 0.3189        | 0.3595        | 0.4106      |              |               |
| <u>PCOD8297791</u> | <u>0.2785</u> | 0.3263        | 0.3715        |             | 0.3715       |               |
| PCOD8327297        | 0.3366        |               | 0.3611        | 0.4173      |              | 0.4200        |
| PCOD8201211        | 0.3049        |               | 0.4099        | 0.4112      |              | <u>0.3269</u> |
| PCOD8323974        | 0.3366        |               | 0.3613        | 0.4372      |              | 0.4194        |
| <u>PCOD8059487</u> | <u>0.2775</u> |               | 0.3517        | 0.4571      |              |               |

| Structure code     | 4-Ring (nm)   | 5-Ring (nm)   | 6-Ring (nm)   | 8-Ring (nm) | 10-Ring (nm) | 12-Ring (nm) |
|--------------------|---------------|---------------|---------------|-------------|--------------|--------------|
| <u>PCOD8288184</u> | <u>0.2899</u> |               | 0.3980        | 0.3649      |              |              |
| <u>PCOD8255854</u> | 0.2945        | 0.3092        | 0.3302        | 0.3549      |              |              |
| <u>PCOD8078966</u> | <u>0.2691</u> |               | 0.3059        |             |              |              |
| <u>PCOD8188014</u> | 0.3002        |               | 0.3789        | 0.4145      | 0.4706       | 0.4330       |
| <u>PCOD8316462</u> | 0.3004        | 0.3180        | 0.3365        | 0.3130      |              |              |
| <u>PCOD8268335</u> | <u>0.2778</u> | 0.3387        | 0.3747        | 0.3877      |              |              |
| <u>PCOD8206296</u> | 0.3021        |               | 0.3772        | 0.4160      |              |              |
| <u>PCOD8174197</u> | 0.2914        | 0.3664        | 0.3970        |             |              |              |
| <u>PCOD8318888</u> | <u>0.2790</u> | 0.3359        | 0.3996        | 0.3744      |              |              |
| <u>PCOD8313047</u> | 0.3424        |               | 0.3459        | 0.3299      |              | 0.4913       |
| <u>PCOD8288548</u> | 0.2904        | 0.3384        | 0.3666        | 0.3771      |              |              |
| <u>PCOD8292983</u> | <u>0.2891</u> | 0.3123        | 0.3754        | 0.3369      |              |              |
| <u>PCOD8250245</u> | 0.2904        |               | 0.3490        | 0.4010      |              |              |
| <u>PCOD8265597</u> | <u>0.2767</u> | 0.3254        | 0.3439        |             |              |              |
| <u>PCOD8250160</u> | <u>0.2897</u> |               | 0.3615        | 0.3891      |              |              |
| <u>PCOD8188016</u> | 0.2901        |               | 0.3607        | 0.3883      |              |              |
| <u>PCOD8224441</u> | 0.2998        |               | 0.3765        | 0.4263      |              |              |
| <u>PCOD8206321</u> | <u>0.2796</u> |               | 0.3546        | 0.4262      |              |              |
| <u>PCOD8323436</u> | 0.3226        |               | 0.3642        |             |              | 0.4822       |
| <u>PCOD8330439</u> | 0.3177        | 0.3964        | 0.3406        | 0.4060      |              |              |
| <u>PCOD8188445</u> | <u>0.2830</u> |               | 0.3894        | 0.4212      |              |              |
| <u>PCOD8194773</u> | <u>0.2859</u> |               | 0.3873        | 0.4236      |              | 0.4738       |
| <u>PCOD8246232</u> | 0.3072        |               | 0.3434        | 0.4560      | 0.4160       |              |
| <u>PCOD8068543</u> | <u>0.2869</u> |               | 0.3817        | 0.4205      |              |              |
| <u>PCOD8268342</u> | <u>0.2794</u> | 0.3336        | 0.3950        | 0.3748      | 0.4668       |              |
| <u>PCOD8235824</u> | <u>0.2887</u> |               | 0.3700        | 0.3886      | 0.4157       |              |
| <u>PCOD8188450</u> | <u>0.2893</u> |               | 0.3725        | 0.3871      |              |              |
| <u>PCOD8298585</u> | <u>0.2802</u> | 0.3329        | 0.3736        | 0.3736      |              |              |
| <u>PCOD8321589</u> | <u>0.2799</u> | 0.3315        | 0.4106        | 0.4289      |              | 0.5026       |
| <u>PCOD8267763</u> | <u>0.2817</u> | 0.3334        | 0.3579        | 0.3749      |              |              |
| <u>PCOD8298581</u> | <u>0.2780</u> | 0.3324        | 0.3857        | 0.3712      |              |              |
| <u>PCOD8265036</u> | 0.3063        |               | 0.3904        | 0.4538      |              |              |
| <u>PCOD8287551</u> | 0.2919        | 0.3267        | 0.4100        | 0.4175      |              |              |
| <u>PCOD8194038</u> | 0.2933        | 0.3514        | 0.4142        | 0.4265      |              |              |
| <u>PCOD8084804</u> | <u>0.2879</u> |               | 0.3604        | 0.3892      |              |              |
| <u>PCOD8287407</u> | 0.2925        | 0.3464        | 0.3855        | 0.3616      |              |              |
| <u>PCOD8191654</u> | <u>0.2880</u> |               | 0.3411        | 0.3804      |              |              |
| <u>PCOD8191655</u> | <u>0.2879</u> |               | 0.3669        | 0.3820      |              |              |
| <u>PCOD8275488</u> | 0.3120        | <u>0.2933</u> | <u>0.2749</u> | 0.4201      |              |              |
| <u>PCOD8202737</u> | <u>0.2883</u> |               | 0.3308        | 0.3779      |              |              |
| <u>PCOD8224778</u> | <u>0.2876</u> |               | 0.3210        | 0.3819      |              |              |
| <u>PCOD8207674</u> | <u>0.2884</u> |               | 0.3508        | 0.3850      |              |              |
| <u>PCOD8323005</u> | 0.3091        | <u>0.2684</u> | <u>0.2993</u> | 0.4370      |              |              |
| <u>PCOD8235822</u> | 0.2902        |               | 0.3470        | 0.3757      |              |              |
| <u>PCOD8327501</u> | <u>0.2760</u> | 0.3319        | 0.3576        | 0.4712      |              | 0.5041       |
| <u>PCOD8057587</u> | <u>0.2721</u> | 0.3612        | 0.3462        | 0.4501      | 0.4466       |              |
| <u>PCOD8207815</u> | 0.2954        | 0.3497        | 0.3660        |             |              |              |
| <u>PCOD8057582</u> | <u>0.2761</u> |               | 0.3696        | 0.3755      |              |              |

| Structure code     | 4-Ring (nm)   | 5-Ring (nm)   | 6-Ring (nm)   | 8-Ring (nm) | 10-Ring (nm) | 12-Ring (nm) |
|--------------------|---------------|---------------|---------------|-------------|--------------|--------------|
| <u>PCOD8270296</u> | <u>0.2823</u> | 0.3260        | 0.3667        | 0.4042      |              |              |
| <u>PCOD8172547</u> | <u>0.2750</u> | 0.3898        | 0.3236        | 0.4527      |              |              |
| <u>PCOD8246794</u> | 0.2967        |               | 0.3079        |             |              |              |
| <u>PCOD8239268</u> | <u>0.2892</u> |               | 0.3562        | 0.4055      |              |              |
| <u>PCOD8068618</u> | <u>0.2866</u> |               | 0.3575        | 0.3999      |              |              |
| <u>PCOD8287233</u> | <u>0.2794</u> | 0.3018        | 0.3343        | 0.4357      | 0.4102       |              |
| <u>PCOD8293075</u> | 0.3091        | <u>0.2917</u> | <u>0.2654</u> |             |              |              |
| <u>PCOD8275312</u> | 0.3251        | <u>0.2986</u> | 0.3309        | 0.4256      |              |              |
| <u>PCOD8069999</u> | <u>0.2820</u> |               | 0.3593        | 0.3994      |              |              |
| <u>PCOD8298395</u> | <u>0.2804</u> | 0.3289        | 0.3804        | 0.3644      |              |              |
| <u>PCOD8202721</u> | <u>0.2856</u> |               | 0.3677        | 0.3689      |              |              |
| <u>PCOD8069998</u> | <u>0.2822</u> |               | 0.3601        | 0.3960      |              |              |
| <u>PCOD8292231</u> | 0.3187        | 0.3454        | 0.3726        | 0.4613      | 0.4214       | 0.4859       |
| <u>PCOD8191641</u> | <u>0.2857</u> |               | 0.3659        | 0.3678      |              |              |
| <u>PCOD8164664</u> | <u>0.2719</u> | 0.3647        | 0.3098        | 0.4523      |              |              |
| <u>PCOD8265788</u> | <u>0.2892</u> | 0.3144        | 0.3314        | 0.4493      |              | 0.4481       |
| <u>PCOD8070119</u> | <u>0.2851</u> |               | 0.3525        | 0.4080      |              |              |
| <u>PCOD8329212</u> | 0.2916        | 0.3620        | 0.3500        | 0.3913      |              | 0.5074       |
| <u>PCOD8266005</u> | <u>0.2816</u> | 0.3527        | 0.4143        | 0.4394      |              |              |
| <u>PCOD8194995</u> | 0.2920        | 0.3202        | 0.3502        | 0.3861      |              |              |
| <u>PCOD8266251</u> | 0.2975        | 0.3544        | 0.3684        | 0.4163      |              |              |
| <u>PCOD8250254</u> | 0.2925        | 0.3382        | 0.3809        | 0.4482      | 0.4459       |              |
| <u>PCOD8068380</u> | 0.3025        | 0.3255        | 0.3572        | 0.4341      |              |              |
| <u>PCOD8323814</u> | 0.2969        |               | <u>0.2999</u> |             |              | 0.3840       |
| <u>PCOD8206142</u> | <u>0.2809</u> | 0.3475        | 0.3690        |             |              |              |
| <u>PCOD8266271</u> | 0.2960        | 0.3517        | 0.4004        | 0.4309      |              |              |
| <u>PCOD8206791</u> | 0.3133        | 0.3098        | 0.3997        | 0.3532      |              | 0.4731       |
| <u>PCOD8230635</u> | 0.3008        |               | 0.3769        | 0.4182      |              |              |
| <u>PCOD8289850</u> | <u>0.2747</u> | <u>0.2891</u> | 0.3620        |             | 0.4178       |              |
| <u>PCOD8057712</u> | <u>0.2848</u> | 0.3381        | 0.4223        | 0.4460      |              |              |
| <u>PCOD8267340</u> | 0.3076        |               | 0.3813        | 0.4344      |              | 0.4773       |
| <u>PCOD8298578</u> | 0.3255        | 0.3197        | 0.3505        |             | 0.4680       |              |
| <u>PCOD8207623</u> | 0.2946        |               | 0.3470        | 0.3470      |              |              |
| <u>PCOD8196746</u> | 0.2970        |               | 0.3959        | 0.4472      |              |              |
| <u>PCOD8230113</u> | 0.2995        |               | 0.3705        | 0.4179      | 0.4516       |              |
| <u>PCOD8286942</u> | <u>0.2825</u> | 0.3629        | 0.3958        |             | 0.4207       |              |
| <u>PCOD8295265</u> | 0.2923        | 0.3036        | 0.3243        |             |              |              |
| <u>PCOD8323528</u> | 0.3299        |               | <u>0.2824</u> |             |              | 0.4856       |
| <u>PCOD8255844</u> | 0.3025        | 0.3203        | 0.3587        | 0.4586      |              |              |
| <u>PCOD8079170</u> | 0.2912        | 0.3328        | 0.3809        | 0.4330      |              |              |
| <u>PCOD8287412</u> | 0.2921        | 0.3219        | 0.3403        |             |              |              |
| <u>PCOD8114602</u> | 0.2945        |               | 0.3732        | 0.3732      |              |              |
| <u>PCOD8323410</u> | 0.3235        |               | 0.3310        | 0.4383      |              | 0.5032       |
| <u>PCOD8230242</u> | 0.3161        | 0.3200        | 0.3697        | 0.4192      |              |              |
| <u>PCOD8194699</u> | 0.2975        |               | 0.3661        | 0.3447      |              |              |
| <u>PCOD8256774</u> | <u>0.2877</u> | 0.3840        | 0.4028        | 0.4134      |              |              |
| <u>PCOD8177285</u> | <u>0.2816</u> | 0.3389        | 0.3907        | 0.4215      |              |              |
| <u>PCOD8070065</u> | <u>0.2801</u> |               | 0.3732        |             |              |              |

| Structure code | 4-Ring (nm)   | 5-Ring (nm)   | 6-Ring (nm)   | 8-Ring (nm) | 10-Ring (nm) | 12-Ring (nm)  |
|----------------|---------------|---------------|---------------|-------------|--------------|---------------|
| PCOD8250376    | 0.3298        | 0.3448        | 0.3486        | 0.4227      |              |               |
| PCOD8224299    | <u>0.2770</u> | 0.3400        | 0.3955        | 0.4171      | 0.4305       |               |
| PCOD8323613    | 0.3372        |               | 0.3780        | 0.4451      |              |               |
| PCOD8278736    | 0.2903        | 0.3539        | 0.3555        |             |              |               |
| PCOD8328559    | 0.3223        | 0.3286        | 0.3560        | 0.4106      |              | 0.5025        |
| PCOD8255699    | <u>0.2804</u> |               | 0.3406        | 0.4333      |              |               |
| PCOD8202513    | 0.3153        | 0.3085        | 0.3185        | 0.3844      |              | 0.4953        |
| PCOD8078965    | 0.3353        | 0.3239        | <u>0.2784</u> | 0.4123      |              |               |
| PCOD8287612    | 0.3036        | 0.3113        | 0.3380        | 0.3933      |              |               |
| PCOD8329960    | 0.2907        | 0.3265        | 0.4109        | 0.4063      |              | 0.4885        |
| PCOD8256053    | 0.2972        | 0.3053        |               |             |              |               |
| PCOD8177530    | <u>0.2897</u> | 0.3461        | 0.3884        | 0.4194      |              | 0.4612        |
| PCOD8079061    | 0.3255        | 0.3659        | 0.3608        | 0.4057      |              |               |
| PCOD8062906    | <u>0.2753</u> | 0.3211        | 0.3880        |             |              |               |
| PCOD8210685    | 0.2917        |               | 0.3891        | 0.3297      |              |               |
| PCOD8210396    | 0.3126        | 0.3054        | 0.3683        | 0.3612      |              | 0.4745        |
| PCOD8084987    | <u>0.2778</u> | 0.3428        | 0.3892        | 0.4177      |              |               |
| PCOD8225818    | <u>0.2752</u> | 0.3203        | 0.3791        |             |              |               |
| PCOD8292985    | 0.3168        | 0.3173        | 0.3587        | 0.3658      |              |               |
| PCOD8328802    | <u>0.2774</u> | 0.3372        | 0.3169        | 0.4318      |              | 0.5003        |
| PCOD8230406    | 0.3012        | 0.3157        | 0.3666        | 0.4369      |              |               |
| PCOD8206627    | 0.2990        | 0.3179        | 0.3553        | 0.3553      |              | 0.4900        |
| PCOD8224431    | 0.2904        | 0.3322        | 0.3929        | 0.4296      |              |               |
| PCOD8177499    | 0.2905        | 0.3323        | 0.3916        | 0.4299      |              |               |
| PCOD8250241    | 0.2923        |               | 0.3774        |             |              |               |
| PCOD8210273    | 0.2945        | 0.3539        | 0.4059        | 0.3194      |              |               |
| PCOD8267131    | 0.3090        | <u>0.2941</u> | 0.3764        | 0.4146      |              |               |
| PCOD8267175    | 0.2971        | 0.3212        | 0.4135        | 0.3923      |              | 0.4830        |
| PCOD8206619    | 0.3051        |               | 0.3957        | 0.4138      |              | <u>0.3230</u> |
| PCOD8275162    | <u>0.2812</u> |               | 0.3991        | 0.4704      | 0.4638       | 0.4704        |
| PCOD8191840    | 0.2911        | 0.3416        | 0.3243        | 0.3956      |              |               |
| PCOD8323492    | 0.3297        |               | 0.3428        | 0.3428      |              | 0.4402        |
| PCOD8325695    | 0.3328        | <u>0.2891</u> | 0.3721        | 0.4390      |              |               |
| PCOD8275535    | 0.2967        | 0.3203        | 0.3741        | 0.3730      |              |               |
| PCOD8308140    | <u>0.2776</u> |               | 0.3606        | 0.4606      |              |               |
| PCOD8068222    | <u>0.2743</u> |               | <u>0.2984</u> |             |              |               |
| PCOD8230860    | 0.3107        | 0.3383        | 0.3142        | 0.4208      |              |               |
| PCOD8086151    | 0.3043        | 0.3169        | 0.3607        | 0.4118      |              |               |
| PCOD8240750    | 0.3029        | 0.3137        | 0.3581        | 0.4198      |              |               |
| PCOD8057974    | <u>0.2815</u> | 0.3391        | 0.4149        | 0.4645      |              | 0.4695        |
| PCOD8207762    | 0.3190        | <u>0.2932</u> | 0.3376        | 0.3762      |              | 0.4807        |
| PCOD8256732    | 0.3308        |               | 0.3500        | 0.3310      |              | 0.4807        |
| PCOD8059987    | 0.3116        | 0.3318        | 0.3787        | 0.4256      |              |               |
| PCOD8208038    | 0.3270        |               | 0.3768        | 0.4154      |              | 0.4784        |
| PCOD8207692    | 0.2994        |               | 0.3583        | 0.4300      |              | 0.3513        |
| PCOD8241500    | <u>0.2842</u> | 0.3421        | 0.4074        | 0.4115      |              |               |
| PCOD8208037    | 0.3266        | 0.2952        | 0.3714        | 0.3762      |              | 0.4901        |
| PCOD8217827    | <u>0.2815</u> | 0.3547        | 0.4142        | 0.4366      |              |               |



| Structure code     | 4-Ring (nm)   | 5-Ring (nm)   | 6-Ring (nm)   | 8-Ring (nm) | 10-Ring (nm) | 12-Ring (nm) |
|--------------------|---------------|---------------|---------------|-------------|--------------|--------------|
| <u>PCOD8188235</u> | <u>0.2848</u> | 0.3212        | 0.3817        | 0.3917      |              | 0.4012       |
| PCOD8269333        | 0.2972        | 0.3431        | 0.3925        | 0.3286      |              |              |
| PCOD8235524        | 0.2971        | 0.3212        | 0.4138        | 0.3923      |              |              |
| <u>PCOD8230781</u> | 0.3090        | <u>0.2941</u> | 0.3622        | 0.4146      |              |              |
| PCOD8193306        | 0.3208        |               | 0.3662        | 0.4284      |              | 0.4846       |
| PCOD8255000        | 0.3208        |               | 0.3669        | 0.4057      |              | 0.4868       |
| PCOD8095196        | 0.3434        |               | 0.3499        | 0.4358      |              | 0.4780       |
| PCOD8058374        | 0.3274        | 0.3216        | 0.3703        |             |              | 0.4605       |
| PCOD8328480        | 0.3237        | 0.3173        | 0.3259        | 0.4349      |              | 0.4320       |
| PCOD8258299        | 0.3297        |               | 0.3451        | 0.4335      |              | 0.4788       |
| PCOD8267808        | 0.3063        |               | 0.3780        | 0.4096      |              | 0.4766       |
| PCOD8079227        | 0.2997        | 0.3275        | 0.4004        |             |              | 0.4446       |
| PCOD8207879        | 0.2911        | 0.3582        | 0.3751        | 0.4070      |              |              |
| PCOD8178950        | 0.3001        | 0.3209        | 0.3846        | 0.4052      |              |              |
| PCOD8241484        | 0.3056        | 0.3466        | 0.3744        | 0.3872      |              |              |
| PCOD8206399        | 0.2960        |               | 0.3371        | 0.4168      |              | 0.4864       |
| PCOD8274259        | 0.3091        |               | 0.3197        | 0.4412      |              |              |
| PCOD8086115        | 0.3479        | 0.3849        | 0.3063        |             |              | 0.4957       |
| PCOD8327034        | 0.3484        |               | 0.3682        | 0.4204      |              |              |
| PCOD8321602        | 0.3554        |               | 0.3681        | 0.4233      |              |              |
| <u>PCOD8240361</u> | 0.3027        |               | <u>0.2929</u> | 0.4342      |              |              |
| PCOD8061081        | 0.2991        | 0.3289        | 0.3059        | 0.3866      |              |              |
| PCOD8057904        | 0.3056        |               | 0.3971        | 0.4041      |              |              |
| PCOD8057902        | 0.3035        | 0.3455        | 0.3162        | 0.4110      |              |              |
| PCOD8196809        | 0.2947        | 0.3197        | 0.3641        | 0.3944      |              | 0.4700       |
| PCOD8080521        | 0.3247        | 0.3212        | 0.4234        | 0.4042      | 0.3981       | 0.4449       |
| PCOD8230494        | 0.3306        | 0.3094        | 0.3936        |             |              | 0.4469       |
| <u>PCOD8195148</u> | <u>0.2856</u> |               | 0.3899        | 0.4307      | 0.4660       | 0.4706       |
| PCOD8039026        |               | 0.3158        | 0.3385        |             |              |              |
| PCOD8203076        | 0.3146        | 0.3067        | 0.3509        | 0.3733      |              | 0.4886       |
| PCOD8092398        | 0.3174        | 0.3103        | 0.3876        |             |              | 0.4798       |
| PCOD8323621        | 0.3523        |               | 0.3741        | 0.4199      |              |              |
| <u>PCOD8250952</u> | 0.3063        | <u>0.2981</u> | 0.3775        | 0.4163      |              |              |
| PCOD8250953        | 0.3419        | 0.2895        | 0.3700        | 0.4206      |              |              |
| PCOD8084263        | 0.3112        | 0.3105        | 0.3623        | 0.4377      | 0.4421       |              |
| PCOD8278785        | 0.3138        |               | 0.3333        | 0.4235      |              | 0.4816       |
| PCOD8208422        | 0.3360        |               | 0.3510        | 0.4070      |              | 0.4904       |
| PCOD8191720        | 0.3120        |               | 0.3506        | 0.4076      |              | 0.4888       |
| PCOD8322663        | 0.3461        |               | 0.3742        | 0.4159      |              |              |
| PCOD8172642        | 0.2961        | 0.3325        | 0.3532        | 0.3918      |              |              |
| PCOD8210381        | 0.2912        | 0.3516        | 0.3594        | 0.4444      |              |              |
| PCOD8321603        | 0.3467        |               | 0.3869        | 0.4105      |              |              |
| PCOD8182548        | 0.3029        |               | 0.3918        | 0.4131      |              |              |
| PCOD8060448        | 0.2962        | 0.3311        | 0.3192        |             |              |              |
| PCOD8235418        | 0.3061        |               | 0.3770        | 0.4026      |              |              |
| PCOD8327059        | 0.3451        |               | 0.3737        | 0.4147      |              |              |
| PCOD8278786        | 0.3129        |               | 0.3686        | 0.4282      |              | 0.4856       |
| <u>PCOD8069007</u> | 0.3333        | 0.3160        | <u>0.2801</u> |             |              |              |

| Structure code     | 4-Ring (nm)   | 5-Ring (nm)   | 6-Ring (nm)   | 8-Ring (nm) | 10-Ring (nm) | 12-Ring (nm) |
|--------------------|---------------|---------------|---------------|-------------|--------------|--------------|
| PCOD8251564        | 0.3139        | 0.3353        | 0.3949        | 0.4377      |              | 0.4660       |
| PCOD8327031        | 0.3496        |               | 0.3895        | 0.4142      |              |              |
| PCOD8312438        | 0.3333        |               | 0.3487        | 0.3927      |              |              |
| PCOD8097531        | 0.2996        | 0.3310        | 0.3849        | 0.3772      |              |              |
| PCOD8321601        | 0.3456        |               | 0.3795        | 0.4150      |              |              |
| PCOD8236883        | 0.3358        | 0.3327        | 0.3313        |             | 0.4145       | 0.4597       |
| PCOD8082880        | 0.3642        | 0.3221        | 0.3458        | 0.4230      |              | 0.4537       |
| PCOD8321883        | 0.3445        |               | 0.3971        | 0.4111      |              |              |
| PCOD8098851        | 0.2992        | 0.3509        | 0.3693        |             |              |              |
| PCOD8095713        | 0.3017        | 0.3221        | 0.3513        | 0.4012      |              |              |
| PCOD8322681        | 0.3440        |               | 0.3884        | 0.4030      |              |              |
| PCOD8098730        | 0.2909        | 0.3443        | 0.3802        | 0.4235      |              |              |
| <u>PCOD8202351</u> | <u>0.2709</u> | 0.3326        | 0.3735        | 0.3839      |              | 0.4786       |
| <u>PCOD8081675</u> | <u>0.2825</u> | 0.3469        | 0.4156        | 0.4365      |              | 0.4724       |
| PCOD8318576        | 0.3379        | 0.3336        |               | 0.3159      |              |              |
| PCOD8089713        | 0.3128        | 0.3568        | 0.3681        | 0.4618      |              | 0.4819       |
| PCOD8080398        | 0.3040        | 0.3091        | 0.4072        | 0.4243      |              |              |
| PCOD8323706        | 0.3469        |               | 0.3901        | 0.4010      |              |              |
| PCOD8085501        | 0.2961        |               | 0.4018        |             |              |              |
| PCOD8070627        | 0.3400        | 0.3063        | 0.3498        |             |              |              |
| <u>PCOD8211431</u> | <u>0.2892</u> | 0.3254        | 0.3547        | 0.3016      |              |              |
| <u>PCOD8060446</u> | <u>0.2801</u> | 0.3415        | 0.3776        | 0.3859      |              |              |
| PCOD8290013        | 0.3038        |               | 0.3092        | 0.4153      |              |              |
| <u>PCOD8060562</u> | <u>0.2805</u> | 0.3449        | 0.3658        | 0.3862      |              |              |
| PCOD8257504        | 0.3265        | 0.3515        | 0.3202        |             |              |              |
| PCOD8067544        | 0.3228        | 0.3355        | 0.3848        | 0.4092      |              | 0.4733       |
| <u>PCOD8085973</u> | 0.3348        | <u>0.2930</u> | <u>0.2774</u> |             |              |              |
| PCOD8323672        | 0.3455        |               | 0.3874        |             |              |              |
| PCOD8307622        | 0.3374        |               | 0.3458        | 0.3872      |              |              |
| PCOD8207078        | 0.3197        | 0.3154        | 0.3816        | 0.3835      |              |              |
| <u>PCOD8085277</u> | <u>0.2897</u> |               | 0.3825        | 0.4068      |              |              |
| PCOD8321848        | 0.3504        |               | 0.3824        | 0.3942      |              | 0.4265       |
| PCOD8070958        | 0.3071        | 0.2930        | 0.3641        | 0.4047      |              |              |
| PCOD8323709        | 0.3464        |               | 0.3815        | 0.3924      |              |              |
| PCOD8323711        | 0.3458        |               | 0.3853        | 0.3929      |              |              |
| PCOD8323707        | 0.3423        |               | 0.3775        | 0.3911      |              |              |
| PCOD8268895        | 0.3039        | 0.3449        | 0.3923        | 0.4301      |              | 0.3925       |
| PCOD8327151        | 0.3442        |               | 0.3827        | 0.3921      |              |              |
| PCOD8327150        | 0.3417        |               | 0.3921        | 0.3892      |              |              |
| <u>PCOD8059902</u> | <u>0.2750</u> | 0.3570        | 0.3724        | 0.3780      | 0.3845       |              |
| PCOD8178240        | 0.3085        | 0.2806        | 0.3255        | 0.3833      |              |              |
| PCOD8080986        | 0.3075        |               | 0.3875        | 0.4160      |              | 0.4540       |
| <u>PCOD8242436</u> | <u>0.2885</u> | 0.3492        | 0.3593        | 0.4074      |              |              |
| PCOD8272108        | 0.3369        | 0.4009        | 0.3936        | 0.3639      |              |              |
| PCOD8321849        | 0.3374        |               | 0.3859        | 0.3905      | 0.4592       |              |
| <u>PCOD8271074</u> | <u>0.2834</u> | 0.3367        | 0.3691        |             |              | 0.3942       |
| PCOD8330616        | 0.3136        | 0.3170        | 0.3771        | 0.3794      |              |              |
| <u>PCOD8241081</u> | 0.3378        | 0.3040        | <u>0.2835</u> |             |              |              |

| Structure code     | 4-Ring (nm)   | 5-Ring (nm)   | 6-Ring (nm)   | 8-Ring (nm)   | 10-Ring (nm) | 12-Ring (nm) |
|--------------------|---------------|---------------|---------------|---------------|--------------|--------------|
| PCOD8280633        | 0.3244        |               | 0.3944        | 0.3341        |              | 0.4795       |
| PCOD8236886        | 0.3389        |               | 0.3192        |               |              |              |
| PCOD8209586        | 0.3003        | 0.3478        | 0.3587        | 0.4229        |              | 0.4829       |
| PCOD8168221        | 0.3153        | 0.3465        | 0.3594        | 0.4178        |              | 0.4841       |
| <u>PCOD8240622</u> | 0.3166        |               | <u>0.2962</u> | 0.4135        |              | 0.4756       |
| PCOD8313199        | 0.2918        |               | 0.3997        | 0.4010        |              | 0.3991       |
| PCOD8330413        | 0.3313        | 0.3061        | 0.3165        | 0.4515        |              | 0.4923       |
| PCOD8313976        | 0.2977        | 0.3438        | 0.3851        | 0.4137        |              |              |
| <u>PCOD8183502</u> | 0.3298        | <u>0.2855</u> | 0.3644        |               |              |              |
| PCOD8088327        | 0.3226        | 0.3000        | 0.3762        | 0.4092        |              | 0.4844       |
| <u>PCOD8065963</u> | 0.3004        | <u>0.2886</u> | 0.3790        | 0.3790        |              |              |
| PCOD8107740        | 0.3064        | 0.3375        | 0.3750        | 0.4071        |              | 0.4597       |
| <u>PCOD8179034</u> | 0.3593        | <u>0.2832</u> | 0.3440        |               |              |              |
| PCOD8275742        | 0.2906        | 0.3508        | 0.3796        | 0.4264        |              | 0.3226       |
| PCOD8270138        | 0.3393        |               | 0.3458        | 0.3566        |              | 0.4851       |
| PCOD8070315        | 0.3209        | 0.3343        | 0.3760        | 0.3958        |              | 0.4751       |
| <u>PCOD8318118</u> | <u>0.2798</u> | 0.3371        | 0.3914        |               |              | 0.4854       |
| PCOD8268116        | 0.2947        |               | 0.3421        | 0.4032        | 0.4667       | 0.4924       |
| PCOD8081812        | 0.3061        |               | 0.3863        | 0.4003        |              | 0.4471       |
| PCOD8183073        | 0.3059        |               | 0.3535        |               |              | 0.4939       |
| PCOD8285178        | 0.3484        | 0.3398        | 0.3315        | 0.3890        |              | 0.4789       |
| PCOD8244280        | 0.3387        | 0.3487        | 0.3493        |               | 0.4059       |              |
| PCOD8178224        | 0.3193        |               | 0.3408        | 0.4083        |              |              |
| <u>PCOD8070185</u> | <u>0.2898</u> |               | 0.3843        |               |              |              |
| PCOD8086466        | 0.3533        |               | 0.3129        | 0.4185        |              | 0.4640       |
| PCOD8070992        | 0.3467        | 0.3316        | 0.3861        | 0.3866        |              | 0.4701       |
| PCOD8251680        | 0.3312        | 0.3197        | 0.3709        | 0.3751        |              | 0.4525       |
| <u>PCOD8060522</u> | <u>0.2823</u> | 0.3304        | 0.3678        | 0.3693        |              |              |
| PCOD8166716        | 0.3305        | 0.3249        | 0.3534        | 0.4042        |              | 0.4604       |
| PCOD8059969        | 0.3382        |               | 0.3243        | 0.4473        | 0.4494       |              |
| PCOD8198870        | 0.2938        | 0.3325        | 0.3672        | 0.4078        |              |              |
| <u>PCOD8290879</u> | <u>0.2841</u> | 0.3107        | 0.3622        | 0.3867        |              |              |
| <u>PCOD8257779</u> | 0.3085        | 0.3193        | 0.3757        | <u>0.2858</u> |              |              |
| PCOD8217837        | 0.2964        | 0.3103        | 0.3530        |               |              |              |
| PCOD8206946        | 0.3262        | 0.3214        | 0.4058        | 0.3519        |              | 0.3449       |
| PCOD8290182        | 0.3322        | 0.3667        | 0.3636        | 0.4333        |              |              |
| PCOD8198644        | 0.2993        | 0.3639        | 0.3675        | 0.3991        |              |              |
| PCOD8186345        | 0.3458        | 0.3763        |               | 0.3695        |              |              |
| PCOD8309700        | 0.3325        | 0.3455        | 0.3418        |               |              |              |
| PCOD8186339        | 0.3071        | 0.3586        | 0.3763        | 0.4288        |              |              |
| PCOD8179872        | 0.3341        |               | 0.3090        | 0.4161        |              | 0.4677       |
| PCOD8290045        | 0.3051        | 0.3124        | 0.3531        | 0.4004        |              | 0.3778       |
| PCOD8087069        | 0.3315        | 0.3389        | 0.4120        | 0.3974        |              |              |
| PCOD8095286        | 0.3209        |               | 0.3171        | 0.4069        |              | 0.4556       |
| PCOD8231237        | 0.3246        | 0.3460        | 0.4002        | 0.3218        |              | 0.4714       |
| PCOD8178144        | 0.3337        |               | 0.3322        | 0.4219        |              | 0.4776       |
| PCOD8088442        | 0.3160        | 0.3564        |               | 0.4392        |              |              |
| PCOD8243411        | 0.3183        | 0.3773        | 0.3575        | 0.3796        |              |              |

| Structure code     | 4-Ring (nm)   | 5-Ring (nm)   | 6-Ring (nm) | 8-Ring (nm) | 10-Ring (nm) | 12-Ring (nm) |
|--------------------|---------------|---------------|-------------|-------------|--------------|--------------|
| PCOD8070036        | 0.3344        |               | 0.3258      | 0.4161      |              | 0.4606       |
| PCOD8211480        | 0.2990        | 0.3466        | 0.3720      | 0.4393      |              | 0.4910       |
| PCOD8240405        | 0.3337        |               | 0.3258      | 0.4162      |              | 0.4522       |
| PCOD8315377        | 0.3331        | 0.3421        | 0.3444      | 0.4537      |              |              |
| PCOD8330788        | 0.3437        |               | 0.3884      | 0.3370      |              |              |
| PCOD8231670        | 0.3200        | 0.3123        | 0.3335      | 0.4074      |              | 0.3953       |
| PCOD8294496        | 0.3360        | 0.3232        | 0.2856      | 0.2673      |              |              |
| PCOD8178875        | 0.3343        |               | 0.3270      | 0.4084      |              | 0.4683       |
| PCOD8254984        | 0.3090        | 0.3052        | 0.3464      | 0.4363      |              |              |
| <u>PCOD8066215</u> | 0.3237        | <u>0.2949</u> | 0.3268      |             |              | 0.4700       |
| PCOD8086461        | 0.3044        |               | 0.3588      | 0.4072      |              | 0.4322       |
| PCOD8028858        | 0.3199        | 0.3459        | 0.2979      | 0.4382      |              | 0.4382       |
| PCOD8096832        | 0.3114        |               | 0.4123      | 0.4385      |              |              |
| PCOD8061492        | 0.3418        | 0.3165        | 0.4224      | 0.4277      |              |              |
| PCOD8074541        | 0.3327        | 0.3270        | 0.3604      | 0.4694      |              |              |
| PCOD8235604        | 0.3284        | 0.3418        | 0.3632      |             |              |              |
| <u>PCOD8267927</u> | <u>0.2880</u> | 0.3540        | 0.3748      | 0.4479      |              | 0.4055       |
| PCOD8073415        | 0.3411        |               | 0.4130      | 0.4092      | 0.4179       |              |
| PCOD8198046        | 0.2956        | 0.3577        | 0.3778      | 0.4156      |              |              |
| <u>PCOD8331133</u> | 0.3425        | <u>0.2893</u> | 0.3139      | 0.4320      |              | 0.4783       |
| PCOD8225116        | 0.3091        | 0.3589        | 0.4129      | 0.3268      |              | 0.4496       |
| PCOD8237027        | 0.3164        |               | 0.3311      | 0.4142      | 0.4145       |              |
| PCOD8070936        | 0.3220        |               | 0.3257      | 0.3979      |              | 0.4617       |
| PCOD8315376        | 0.3304        | 0.3386        | 0.3429      |             |              |              |
| PCOD8095289        | 0.3357        |               | 0.3266      | 0.3628      |              | 0.4803       |
| PCOD8209245        | 0.3113        | 0.3360        | 0.3997      | 0.3181      |              | 0.4717       |
| PCOD8188707        | 0.3222        | 0.3099        | 0.3618      | 0.3720      |              | 0.4367       |
| PCOD8307665        | 0.3342        |               | 0.4093      | 0.4093      |              |              |
| PCOD8279136        | 0.3161        | 0.3466        | 0.4107      | 0.3388      |              | 0.4570       |
| PCOD8243507        | 0.3034        | 0.3524        | 0.3844      | 0.4126      |              | 0.4605       |
| PCOD8179173        | 0.3362        |               | 0.3513      | 0.4112      |              |              |
| PCOD8063144        | 0.3552        |               | 0.3148      | 0.3978      |              | 0.4716       |
| PCOD8257777        | 0.3575        | 0.3489        | 0.3613      | 0.3926      | 0.4112       | 0.4686       |
| PCOD8063232        | 0.3349        |               | 0.3134      | 0.4084      |              | 0.4815       |
| PCOD8103956        | 0.3347        | 0.3598        | 0.3031      | 0.4225      |              |              |
| PCOD8213046        | 0.3430        |               | 0.3068      | 0.3956      |              | 0.4643       |
| PCOD8182998        | 0.3274        |               | 0.3244      | 0.3908      |              | 0.4619       |
| PCOD8320305        | 0.2915        | 0.3302        | 0.3846      | 0.3819      |              | 0.4766       |
| PCOD8243020        | 0.3278        | 0.3447        | 0.3937      | 0.3236      |              | 0.4703       |
| PCOD8219153        | 0.3260        | 0.3450        | 0.3945      | 0.4000      |              |              |
| PCOD8088115        | 0.3291        | 0.3460        | 0.3629      | 0.4167      | 0.4206       |              |
| PCOD8189533        | 0.3340        |               | 0.3989      | 0.4111      |              |              |
| PCOD8073438        | 0.3369        |               | 0.3926      | 0.4140      | 0.4014       |              |
| PCOD8225131        | 0.3322        | 0.3319        | 0.3883      | 0.4089      |              |              |
| PCOD8209392        | 0.3052        | 0.3520        | 0.3768      |             | 0.4517       | 0.4741       |
| PCOD8258339        | 0.3360        |               | 0.3570      | 0.3490      |              |              |
| PCOD8099688        | 0.3380        | 0.3356        | 0.3737      | 0.3112      |              | 0.4660       |
| PCOD8262315        | 0.3350        | 0.3442        | 0.4032      | 0.3652      |              |              |

| Structure code     | 4-Ring (nm)   | 5-Ring (nm) | 6-Ring (nm) | 8-Ring (nm)   | 10-Ring (nm) | 12-Ring (nm) |
|--------------------|---------------|-------------|-------------|---------------|--------------|--------------|
| PCOD8072345        | 0.3376        | 0.3269      | 0.3733      | 0.4026        | 0.4064       |              |
| PCOD8209934        | 0.3144        | 0.3252      | 0.3494      | 0.4170        | 0.4517       | 0.4824       |
| PCOD8110532        | 0.3429        | 0.3212      |             | 0.4318        |              |              |
| PCOD8243266        | 0.3379        |             | 0.4018      | 0.3783        | 0.4464       |              |
| PCOD8073440        | 0.3368        |             | 0.3868      | 0.4053        |              |              |
| PCOD8098327        | 0.3103        | 0.3481      | 0.3494      | 0.4087        |              |              |
| PCOD8210062        | 0.2903        | 0.3689      | 0.3419      | 0.4060        | 0.4127       |              |
| PCOD8325566        | 0.3284        | 0.3300      | 0.3660      | 0.4469        |              | 0.4917       |
| PCOD8073500        | 0.3269        |             | 0.3995      | 0.4090        |              |              |
| PCOD8300086        | 0.3125        | 0.3404      | 0.3498      | 0.4186        |              |              |
| PCOD8273328        | 0.3050        | 0.3203      | 0.3510      | 0.3924        |              | 0.4769       |
| <u>PCOD8273359</u> | <u>0.2642</u> | 0.3328      | 0.3504      | 0.3914        | 0.4366       | 0.4373       |
| PCOD8073258        | 0.3357        | 0.3314      | 0.4051      | 0.4548        | 0.4012       |              |
| PCOD8242749        | 0.3417        |             | 0.3420      | 0.3481        | 0.4134       |              |
| <u>PCOD8276325</u> | 0.3414        |             | 0.3475      | <u>0.2985</u> |              | 0.4885       |
| <u>PCOD8052423</u> | <u>0.2392</u> |             | 0.3924      | 0.3861        |              |              |
| PCOD8166818        | 0.3392        |             | 0.3926      | 0.3855        |              |              |
| PCOD8319635        | 0.3479        |             | 0.3286      | 0.3560        |              |              |
| PCOD8236328        | 0.3383        | 0.3287      | 0.3906      | 0.4066        |              |              |
| PCOD8211717        | 0.3368        |             | 0.3295      |               |              |              |
| PCOD8186416        | 0.2977        | 0.3753      | 0.3605      |               | 0.4572       |              |
| PCOD8232428        | 0.3335        |             | 0.3731      | 0.3888        |              |              |
| PCOD8074064        | 0.3286        |             | 0.3842      | 0.4038        |              |              |
| PCOD8073543        | 0.3412        |             | 0.3585      | 0.3903        |              |              |
| PCOD8090218        | 0.3053        | 0.3406      | 0.3863      | 0.4015        | 0.4113       |              |
| PCOD8300489        | 0.3241        | 0.3670      | 0.3623      | 0.4136        |              |              |
| PCOD8098002        | 0.3449        |             | 0.3665      | 0.3890        | 0.3772       |              |
| PCOD8183105        | 0.3252        | 0.3422      | 0.3750      | 0.3151        |              | 0.4645       |
| PCOD8087731        | 0.3290        |             | 0.3139      | 0.3770        |              | 0.4720       |
| PCOD8326815        | 0.3365        | 0.3266      | 0.3546      |               |              |              |
| PCOD8262847        | 0.3248        |             | 0.4076      | 0.3863        | 0.4010       |              |
| PCOD8241793        | 0.3247        | 0.3164      | 0.3585      | 0.4321        |              |              |
| PCOD8182952        | 0.3367        |             | 0.3168      | 0.3696        |              | 0.4747       |
| PCOD8106072        | 0.3383        |             | 0.3885      | 0.3761        |              |              |
| PCOD8225456        | 0.3170        | 0.3392      | 0.3864      | 0.4024        |              |              |
| PCOD8259991        | 0.3370        |             | 0.3904      | 0.3885        |              |              |
| PCOD8290468        | 0.3039        |             |             |               |              | 0.4753       |
| PCOD8243564        | 0.3239        | 0.3371      | 0.3945      | 0.3665        | 0.4683       |              |
| PCOD8246643        | 0.3404        | 0.3340      | 0.4080      | 0.3931        |              |              |
| PCOD8258969        | 0.3315        |             | 0.3650      | 0.3817        |              |              |
| PCOD8325644        | 0.3237        | 0.3503      | 0.3719      |               |              | 0.4962       |
| PCOD8088193        | 0.3050        | 0.3348      | 0.3828      |               |              | 0.4174       |
| <u>PCOD8211701</u> | <u>0.2789</u> | 0.3252      | 0.3637      |               | 0.4438       | 0.4926       |
| <u>PCOD8219945</u> | <u>0.2869</u> | 0.3440      | 0.3865      | 0.3615        | 0.4358       |              |
| PCOD8327844        | 0.3675        |             | 0.3476      | 0.3651        |              | 0.4913       |
| PCOD8198832        | 0.3052        | 0.3681      | 0.3524      | 0.4256        |              |              |
| PCOD8097783        | 0.3274        |             | 0.3014      | 0.3960        |              |              |
| PCOD8072054        | 0.3298        | 0.3343      | 0.3885      | 0.4235        |              |              |

| Structure code     | 4-Ring (nm)   | 5-Ring (nm) | 6-Ring (nm) | 8-Ring (nm) | 10-Ring (nm) | 12-Ring (nm) |
|--------------------|---------------|-------------|-------------|-------------|--------------|--------------|
| PCOD8088719        | 0.3206        | 0.3490      | 0.3957      | 0.3893      |              |              |
| PCOD8259023        | 0.3460        | 0.3213      | 0.3814      | 0.4034      | 0.4346       |              |
| PCOD8173427        | 0.3247        |             | 0.3294      | 0.3986      |              |              |
| PCOD8259711        | 0.2956        | 0.3446      | 0.3402      | 0.3930      |              |              |
| PCOD8189576        | 0.3394        | 0.3250      | 0.3485      | 0.4027      | 0.4100       |              |
| PCOD8092706        | 0.3309        | 0.3439      | 0.3737      | 0.3648      |              |              |
| PCOD8103054        | 0.2984        | 0.3388      | 0.3442      | 0.3792      |              |              |
| PCOD8065409        | 0.3159        | 0.3326      |             | 0.4148      |              |              |
| PCOD8232239        | 0.3427        |             | 0.3632      | 0.3578      |              |              |
| PCOD8064289        | 0.3242        | 0.3349      | 0.3205      | 0.3206      |              | 0.4188       |
| PCOD8099355        | 0.3233        |             | 0.3819      | 0.3818      |              |              |
| PCOD8074749        | 0.3500        | 0.3091      | 0.3691      | 0.4012      |              |              |
| PCOD8243691        | 0.3338        |             |             |             |              |              |
| <u>PCOD8263681</u> | <u>0.2898</u> | 0.3633      | 0.3450      | 0.3814      | 0.4653       |              |
| PCOD8260013        | 0.3289        |             | 0.3813      | 0.4165      | 0.4338       |              |
| PCOD8073501        | 0.3301        |             | 0.3978      | 0.3761      |              |              |
| PCOD8219361        | 0.3396        |             | 0.3769      | 0.3185      |              |              |
| PCOD8213334        | 0.3312        |             | 0.3724      | 0.4122      |              |              |
| PCOD8075380        | 0.3234        | 0.3455      | 0.4074      | 0.4241      | 0.4506       |              |
| <u>PCOD8259425</u> | <u>0.2881</u> | 0.3631      | 0.3411      | 0.3724      | 0.4315       |              |
| PCOD8189960        | 0.3413        |             | 0.3576      | 0.3666      | 0.4025       |              |
| PCOD8252799        | 0.3269        |             |             |             |              |              |
| PCOD8103186        | 0.3375        | 0.3259      | 0.3658      | 0.3834      | 0.4631       |              |
| PCOD8141547        | 0.3492        | 0.3214      | 0.3385      |             |              | 0.4570       |
| PCOD8064489        | 0.3194        | 0.3296      | 0.3564      | 0.3866      |              |              |
| PCOD8159596        | 0.3434        | 0.3253      |             | 0.3858      |              |              |
| PCOD8264773        | 0.3396        | 0.3687      | 0.3608      | 0.4432      |              |              |
| PCOD8245244        | 0.3252        |             | 0.3808      | 0.4015      |              |              |
| PCOD8104545        | 0.3324        | 0.3530      | 0.3387      | 0.4187      |              |              |
| PCOD8101405        | 0.3408        | 0.3296      | 0.3655      | 0.3717      |              |              |
| PCOD8232833        | 0.3362        |             | 0.3696      | 0.4360      | 0.4395       |              |
| PCOD8238549        | 0.3350        | 0.3156      | 0.3952      | 0.4606      |              |              |
| PCOD8223545        | 0.3430        | 0.3218      | 0.4330      | 0.4518      |              |              |
| PCOD8308701        | 0.3401        |             | 0.3781      | 0.3779      |              |              |
| PCOD8175779        | 0.3421        |             | 0.3770      | 0.4090      |              |              |
| PCOD8167566        | 0.3707        |             | 0.3805      | 0.3995      |              |              |
| PCOD8166844        | 0.3510        |             | 0.3834      | 0.3949      |              |              |
| PCOD8273381        | 0.3072        |             | 0.3672      | 0.3912      | 0.4155       |              |
| PCOD8099864        | 0.3410        | 0.3190      | 0.3314      | 0.4280      |              |              |
| PCOD8073265        | 0.3334        | 0.3275      | 0.3517      | 0.3854      | 0.4014       |              |
| PCOD8102090        | 0.3135        | 0.3559      | 0.3509      | 0.3941      |              |              |
| PCOD8142649        | 0.3267        | 0.3340      | 0.3274      |             |              |              |
| <u>PCOD8280240</u> | <u>0.2729</u> | 0.3751      | 0.3615      | 0.3650      | 0.4751       |              |
| PCOD8049981        | 0.3265        | 0.3337      | 0.3275      |             |              |              |
| PCOD8212629        | 0.3293        | 0.3606      | 0.3336      |             |              |              |
| PCOD8263321        | 0.2981        | 0.3549      | 0.3377      |             |              |              |
| PCOD8279905        | 0.3279        |             | 0.3355      | 0.4036      |              |              |
| PCOD8166947        | 0.3521        |             | 0.3699      | 0.4099      |              |              |

| Structure code     | 4-Ring (nm)   | 5-Ring (nm)   | 6-Ring (nm) | 8-Ring (nm) | 10-Ring (nm) | 12-Ring (nm) |
|--------------------|---------------|---------------|-------------|-------------|--------------|--------------|
| PCOD8299839        | 0.3315        | 0.3630        | 0.3654      | 0.3958      |              |              |
| PCOD8074186        | 0.3423        | 0.3690        | 0.3949      | 0.3770      | 0.4514       |              |
| PCOD8203264        | 0.3054        | 0.3446        | 0.3725      | 0.3361      |              | 0.4647       |
| PCOD8263142        | 0.3389        |               | 0.3250      | 0.4307      | 0.3834       |              |
| PCOD8184109        | 0.3445        |               | 0.3505      | 0.3505      |              |              |
| PCOD8244420        | 0.3570        | 0.3267        | 0.3802      | 0.3753      |              |              |
| PCOD8212659        | 0.3124        | 0.3622        | 0.3453      | 0.3950      | 0.4431       |              |
| PCOD8030566        | 0.3594        | 0.3168        | 0.3526      | 0.4468      |              |              |
| PCOD8092485        | 0.3282        | 0.3852        | 0.3098      | 0.4125      | 0.4283       |              |
| PCOD8226345        | 0.3352        |               | 0.3472      | 0.3647      |              |              |
| PCOD8226678        | 0.3499        |               | 0.3757      | 0.4370      |              |              |
| PCOD8064814        | 0.3080        |               | 0.3483      | 0.4170      |              |              |
| PCOD8253793        | 0.3455        |               | 0.3461      | 0.3779      |              |              |
| PCOD8106914        | 0.3463        |               | 0.3422      |             |              |              |
| PCOD8100187        | 0.3036        | 0.3439        | 0.3501      | 0.3896      |              |              |
| PCOD8126287        | 0.3407        |               | 0.3781      | 0.4074      |              |              |
| <u>PCOD8108172</u> | <u>0.2881</u> | 0.3799        | 0.3608      |             | 0.4764       |              |
| PCOD8053556        | 0.3415        | 0.3563        | 0.3709      | 0.3887      |              |              |
| PCOD8262533        | 0.3109        | 0.3220        | 0.3631      | 0.4242      |              |              |
| PCOD8107265        | 0.3492        |               | 0.3656      | 0.3716      | 0.4373       |              |
| PCOD8238333        | 0.2951        | 0.3421        | 0.4156      | 0.4026      |              |              |
| PCOD8252568        | 0.3441        | 0.3543        | 0.3929      | 0.4034      | 0.4629       |              |
| PCOD8204154        | 0.3318        |               | 0.3330      | 0.3944      |              |              |
| PCOD8263726        | 0.3138        |               | 0.3805      | 0.4025      | 0.4559       |              |
| PCOD8259339        | 0.3376        | 0.3511        | 0.3683      | 0.3417      | 0.4301       |              |
| PCOD8280218        | 0.3360        | 0.3271        | 0.3214      | 0.3073      |              | 0.4604       |
| PCOD8186502        | 0.2979        | 0.3564        | 0.3422      | 0.3477      |              |              |
| PCOD8066265        | 0.3333        | 0.3365        | 0.4068      | 0.3715      |              |              |
| PCOD8106085        | 0.3199        |               | 0.3792      | 0.4329      |              |              |
| PCOD8190086        | 0.3277        |               | 0.3883      | 0.3838      |              |              |
| PCOD8053512        | 0.3282        | 0.3337        | 0.3229      |             | 0.4148       |              |
| PCOD8074925        | 0.3106        |               | 0.3233      | 0.3822      |              |              |
| PCOD8063798        | 0.3285        |               | 0.3294      | 0.3699      |              |              |
| <u>PCOD8066118</u> | <u>0.2886</u> | <u>0.2946</u> | 0.3435      |             |              | 0.3643       |
| PCOD8101543        | 0.3276        | 0.3165        | 0.3260      | 0.3784      | 0.4522       |              |
| PCOD8103191        | 0.3125        | 0.3390        | 0.3288      |             |              |              |
| PCOD8253792        | 0.3500        |               | 0.3645      | 0.3676      |              |              |
| PCOD8065512        | 0.3118        | 0.3524        | 0.3628      | 0.3887      |              |              |
| PCOD8108886        | 0.3367        | 0.3447        | 0.4060      | 0.3977      |              |              |
| PCOD8260200        | 0.3080        |               | 0.3689      | 0.4067      |              |              |
| PCOD8175660        | 0.3235        |               | 0.3852      | 0.4179      |              |              |
| PCOD8100640        | 0.3287        | 0.3535        | 0.3128      | 0.3876      |              |              |
| PCOD8106132        | 0.3090        |               | 0.3860      | 0.4280      |              |              |
| PCOD8101754        | 0.3371        | 0.3378        | 0.4224      | 0.3568      |              |              |
| PCOD8106011        | 0.3168        |               | 0.3764      | 0.4166      |              |              |
| PCOD8253230        | 0.3146        |               | 0.3650      | 0.4107      |              |              |
| PCOD8076067        | 0.3176        |               | 0.3862      | 0.3862      |              |              |
| PCOD8212295        | 0.3310        | 0.3319        | 0.3606      | 0.3658      | 0.4431       |              |

| Structure code | 4-Ring (nm) | 5-Ring (nm) | 6-Ring (nm) | 8-Ring (nm) | 10-Ring (nm) | 12-Ring (nm) |
|----------------|-------------|-------------|-------------|-------------|--------------|--------------|
| PCOD8106010    | 0.3191      |             | 0.3768      | 0.4531      |              |              |
| PCOD8074911    | 0.3036      | 0.3580      | 0.3384      | 0.3809      |              |              |
| PCOD8071734    | 0.3127      | 0.3238      | 0.3676      | 0.3860      |              |              |
| PCOD8170247    | 0.3187      |             | 0.3767      | 0.4204      |              |              |
| PCOD8102052    | 0.3285      | 0.3626      | 0.3372      | 0.3833      | 0.4143       |              |
| PCOD8189478    | 0.3383      | 0.3220      | 0.3611      | 0.3697      |              |              |
| PCOD8189713    | 0.3446      | 0.3333      |             | 0.3577      |              |              |
| PCOD8103161    | 0.3053      |             | 0.3448      | 0.3909      |              |              |
| PCOD8238064    | 0.3135      |             | 0.3801      | 0.4232      |              |              |
| PCOD8100218    | 0.3419      |             | 0.3667      | 0.3829      |              |              |
| PCOD8253969    | 0.3166      |             | 0.3663      | 0.4215      |              |              |
| PCOD8108406    | 0.3493      | 0.3545      | 0.3944      | 0.3873      |              |              |
| PCOD8049791    | 0.3474      | 0.3194      | 0.3751      | 0.4055      |              |              |
| PCOD8237350    | 0.3412      | 0.3448      | 0.3147      | 0.3963      |              |              |
| PCOD8180088    | 0.3460      |             | 0.3711      | 0.3985      | 0.4396       |              |
| PCOD8220674    | 0.3192      | 0.3735      | 0.3792      | 0.3971      | 0.4281       |              |
| PCOD8233108    | 0.3170      | 0.3738      | 0.3506      | 0.3813      |              |              |
| PCOD8109096    | 0.3626      |             | 0.3633      | 0.3780      |              |              |
| PCOD8330772    | 0.2985      |             | 0.3815      | 0.3733      |              | 0.4810       |
| PCOD8062708    |             | 0.3599      | 0.3123      | 0.3975      |              |              |
| PCOD8213655    | 0.3245      |             | 0.3490      | 0.3876      |              |              |
| PCOD8210118    | 0.3243      |             | 0.3210      | 0.3734      |              |              |
| PCOD8173853    | 0.3360      |             | 0.3667      | 0.3667      |              |              |
| PCOD8107094    | 0.3259      |             | 0.3624      | 0.4315      |              |              |
| PCOD8065286    | 0.3197      |             | 0.3275      | 0.3275      | 0.3788       |              |
| PCOD8280920    |             | 0.3576      | 0.3343      | 0.3781      |              |              |
| PCOD8075297    |             | 0.3600      | 0.3504      | 0.4011      | 0.4381       |              |
| PCOD8254037    | 0.3120      | 0.3660      | 0.3540      | 0.3577      |              |              |
| PCOD8308388    | 0.3396      |             | 0.3625      | 0.4160      |              |              |
| PCOD8154046    |             | 0.3224      | 0.3456      |             |              |              |
| PCOD8260399    | 0.2982      | 0.3464      | 0.3751      | 0.4054      |              |              |
| PCOD8273476    | 0.3194      |             | 0.3579      | 0.3865      |              |              |
